# Supplementary material for: Visible-light-promoted hydroxysulfenylation of alkenes for the synthesis of β-hydroxysulfides
Source: Royal Society of Chemistry journal article supplement (doi:10.1039/d5ob01424g), 2025-01-01

## Visible-light-promoted hydroxysulfenylation of alkenes for the synthesis of $\beta$ -hydroxysulfides

Rekha Bai,<sup>a</sup> Yi-Xuan Jian,<sup>a</sup> Shih-Jie Chen,<sup>a</sup> Indrajit Karmakar<sup>a</sup> and Chin-Fa Lee<sup>\*a,b,c</sup>

<sup>a</sup> Department of Chemistry, National Chung Hsing University, Taichung, Taiwan 402, Republic of China. Email: [cfalee@dragon.nchu.edu.tw](mailto:cfalee@dragon.nchu.edu.tw)

<sup>b</sup> *i*-Center for Advanced Science and Technology (iCAST), National Chung Hsing University, Taichung, Taiwan 402, Republic of China.

<sup>c</sup> Innovation and Development Center of Sustainable Agriculture (IDCSA), National Chung Hsing University, Taichung, Taiwan 402, Republic of China.

| Entry | Contents                                                                | Pg. No   |
|-------|-------------------------------------------------------------------------|----------|
| 1     | Light on-off experiment                                                 | S2       |
| 2     | <sup>1</sup> H-NMR titration experiment                                 | S3-S5    |
| 3     | UV-vs spectroscopic studies                                             | S5-S6    |
| 4     | Stern–Volmer Studies                                                    | S6-S7    |
| 5     | EPR experiments                                                         | S7-S9    |
| 6     | References                                                              | S9       |
| 7     | Copies of <sup>1</sup> H, <sup>13</sup> C, <sup>19</sup> F-NMR and Mass | S10-S164 |

## Light on-off experiment<sup>S1</sup>

For the on-off experiments, five oven-dried 10 mL Schlenk tubes were charged with styrene **1a** (0.5 mmol), thiophenol **2a** (1.0 equiv.), DABCO (1.3 equiv.), and EtOH (2 mL). An oxygen-filled balloon was attached to each tube, after which the reaction mixtures were stirred and irradiated under 410 nm Blue-light emitting diode at room temperature. After 1h, the LED was turn off, and one tube was removed from the irradiation setup for analysis. The remaining four tubes were stirred in the absence of light for an additional 1 h. We than, one tube was removed for analysis, and light turn back to on to irradiate remaining three reaction mixtures. After an additional 1h of irradiation, the LED was turn off, and one tube removed for analysis. The remaining two tubes were stirred in the absence of light for an additional 1h. Then, one tube was removed for analysis and the blue LED was turned back on to irradiate the last one reaction mixture. After an additional 1h irradiation, the last one was analyzed. Yield was determined by <sup>1</sup>H NMR spectroscopy using 1,3,5 trimethoxy benzene as internal standard.

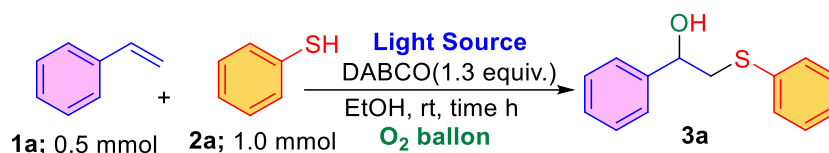

| Entry | Time (h) | Experiments | 3a yield (%) |
|-------|----------|-------------|--------------|
| 1     | 0        | -           | 0            |
| 2     | 1        | on          | 49           |
| 3     | 2        | off         | 50           |
| 4     | 3        | on          | 76           |
| 5     | 4        | off         | 77           |
| 6     | 5        | on          | 90           |

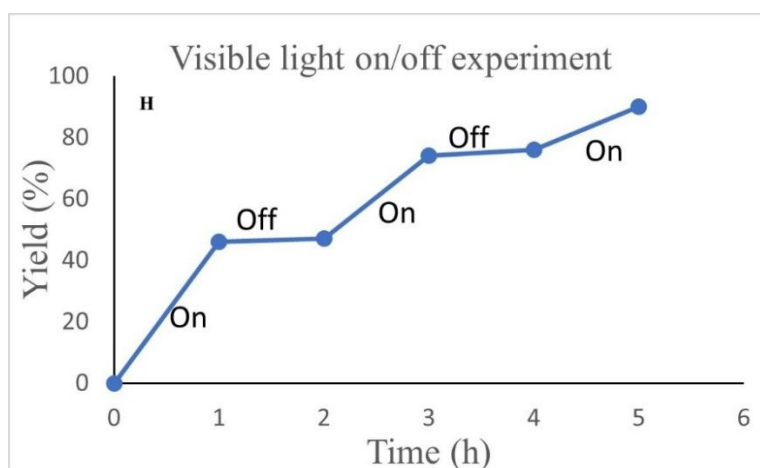

**Fig S1:** Light on-off experiments

### <sup>1</sup>H-NMR titration experiment to detect EDA complex formation<sup>S1</sup>

<sup>1</sup>H NMR experiments were carried out in CDCl<sub>3</sub> solution containing 4-methoxy styrene **1f** and 2-methyl thiol **2b** in varying ratio. As the concentration of 4-methoxy styrene **2f** increased, the methyl proton of **2b** shifted little up-field, while the methoxy protons of **1f** shifted little downfield. These reciprocal changes confirmed the formation of an electron donor-acceptor (EDA) complex between **1f** and **2b**

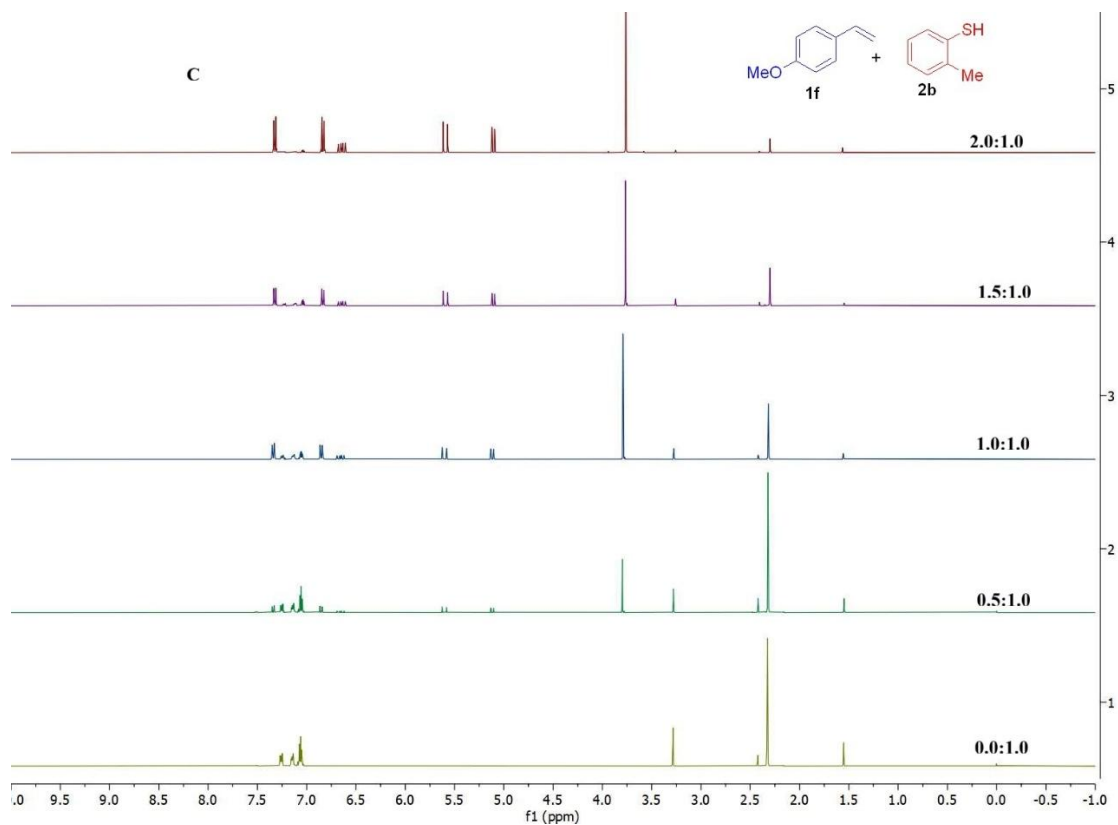

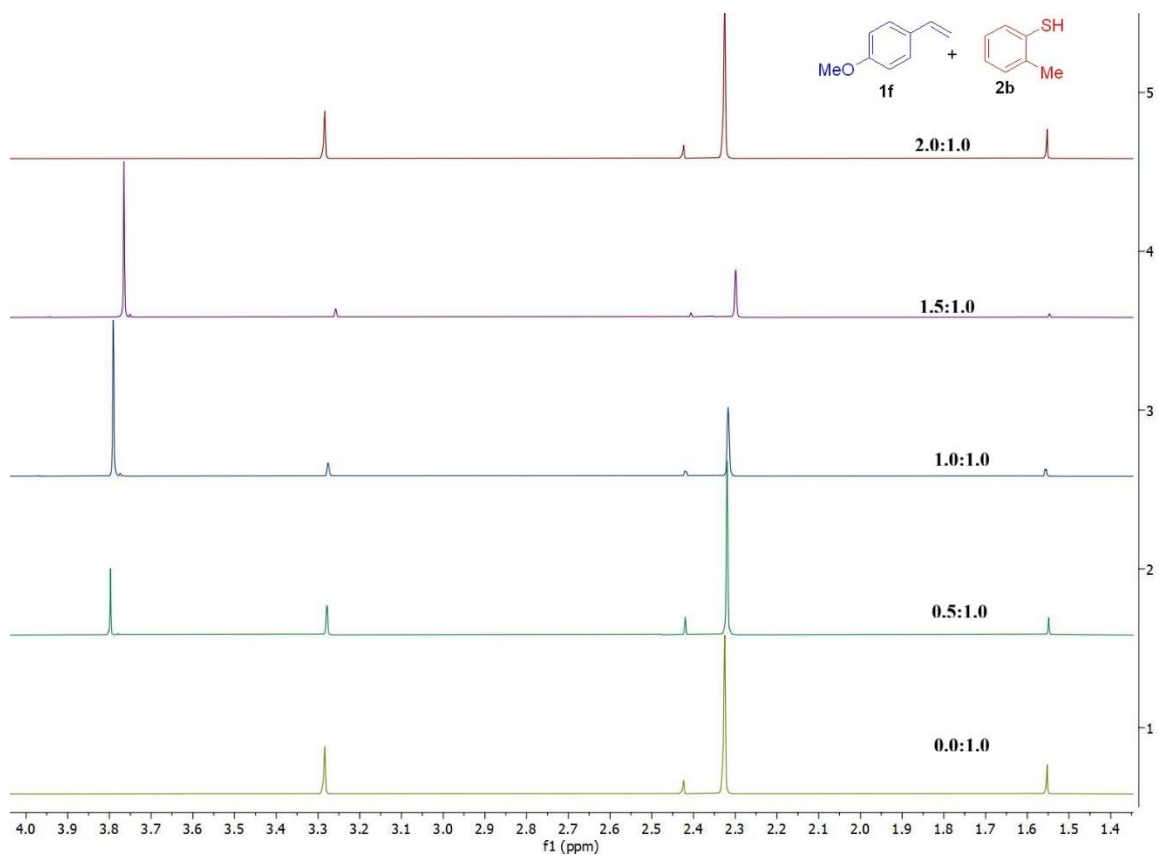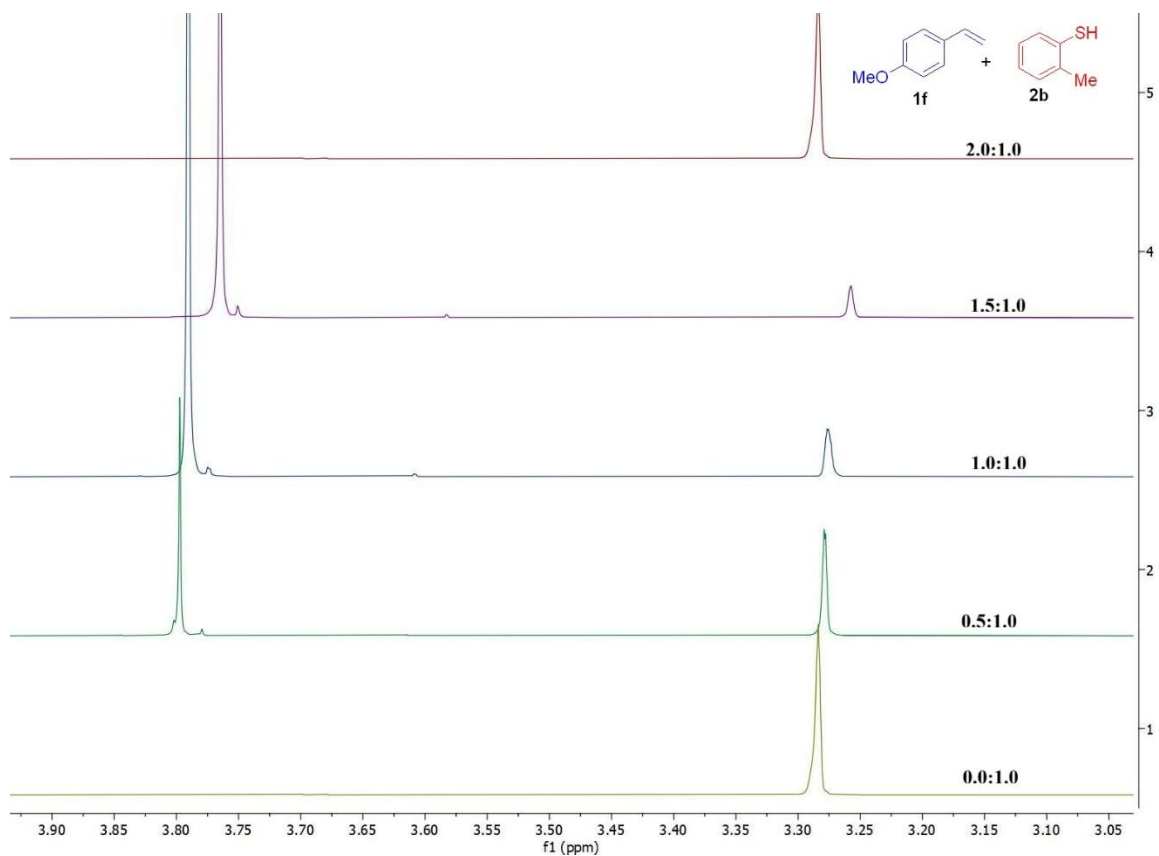

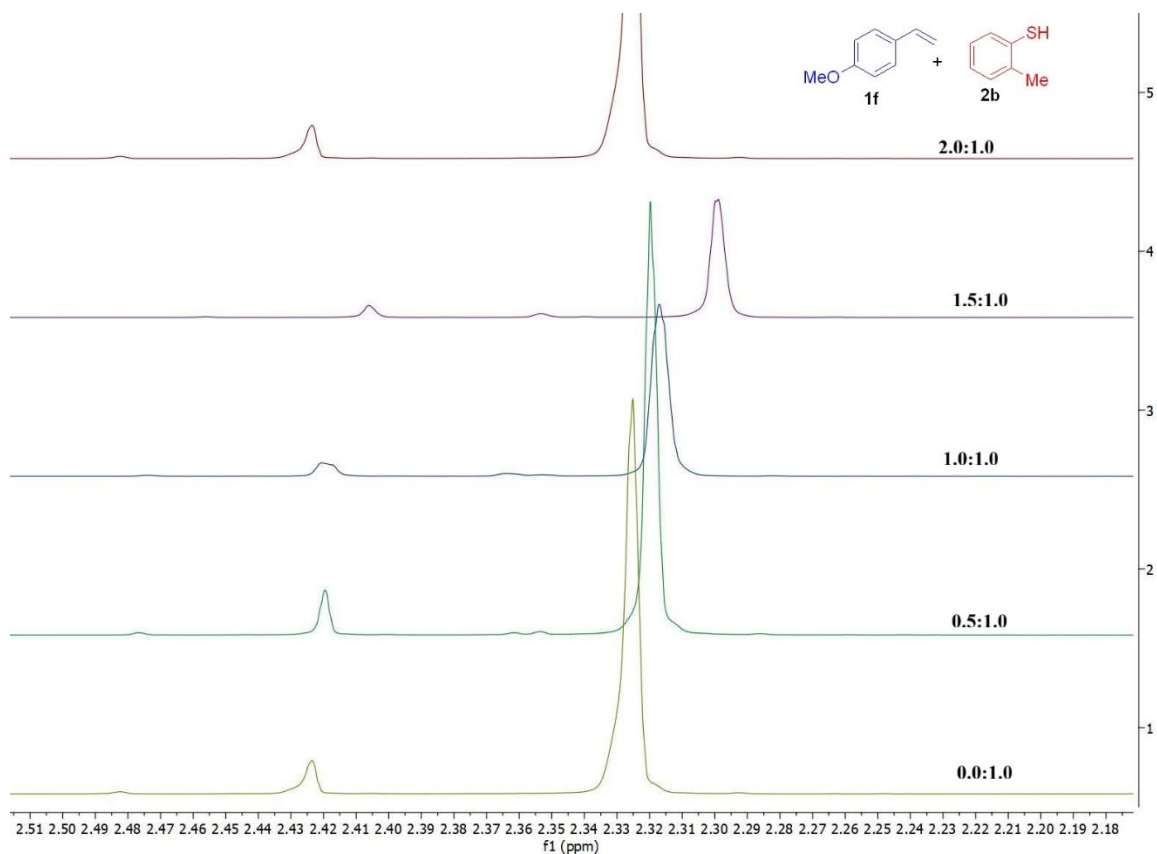

**Fig S2:** Evidence for the formation of Electron-donor-acceptor complex through  $^1\text{H}$  NMR

### Spectroscopic studies<sup>S1</sup>

The UV-Vis absorption spectra of styrene **1a** (25 mM), 2-methoxythiophenol **2d** (50 mM), and DABCO (50 mM) in ethanol were recorded using 1 cm quartz cuvettes on a U-3900 spectrophotometer (Fig. S3-S4). The spectra were obtained for each component individually as well as for their 1:1 binary mixture. In the mixed samples, two new absorption bands appear at wavelength above 300 nm, which were absent in the spectra of the individual components. The appearance of these additional bands suggests the formation of an EDA (electron donor-acceptor) complex between thiolate species and the styrene **1a**, thereby supporting the involvement of an EDA complex in this blue-LED driven reaction pathway.

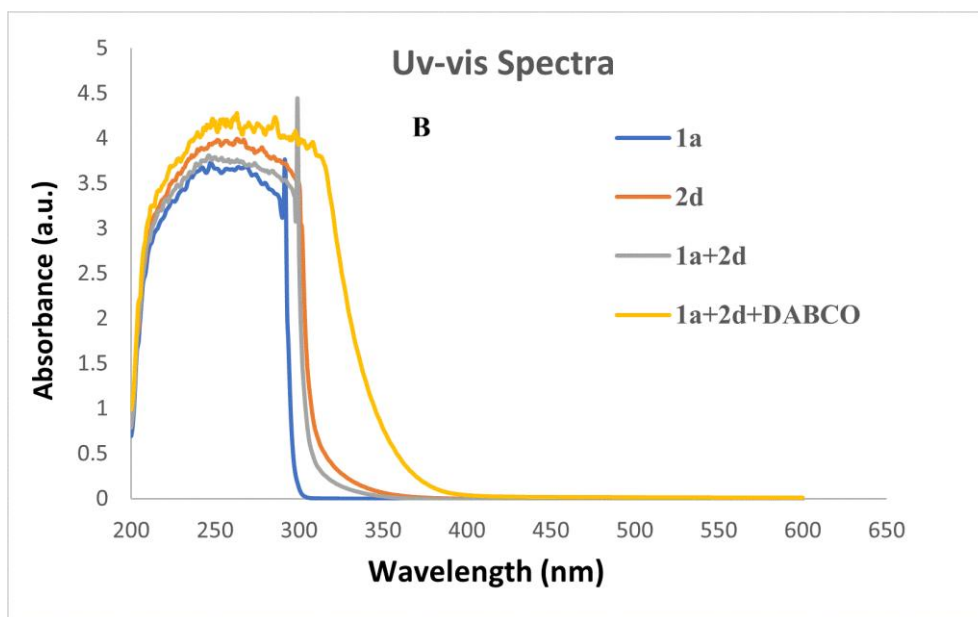

**Fig. S3:** UV-vis spectroscopic measurements on various **1a**, **2d**, and DABCO and their combination in EtOH

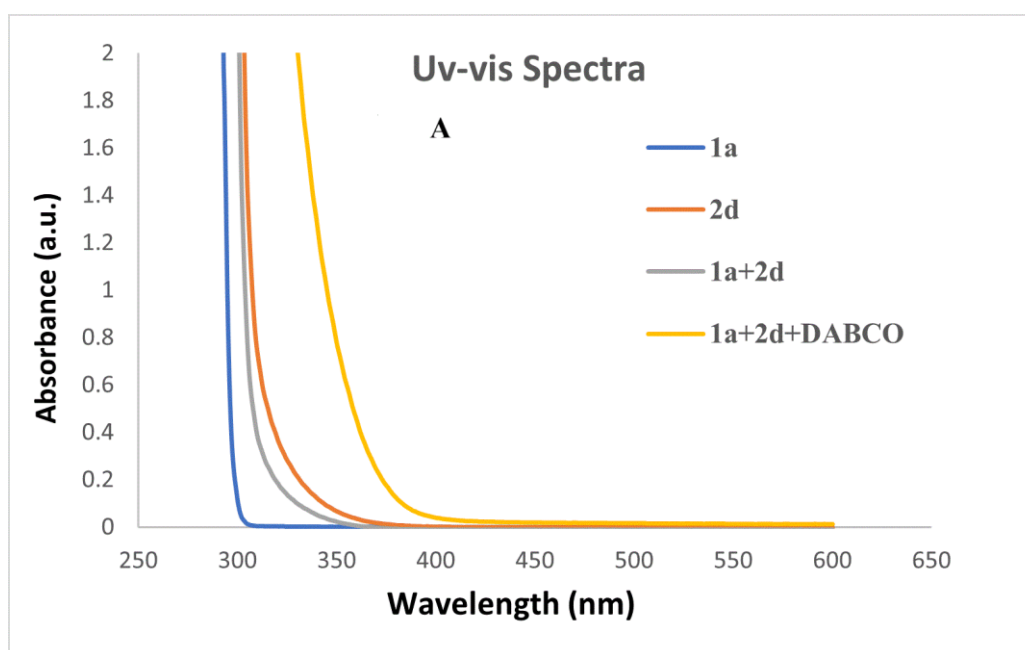

**Fig. S4:** UV-vis spectroscopic measurements on various **1a**, **2d** and DABCO their combination in EtOH

#### Fluorescence studies (Stern–Volmer Studies)

The fluorescence emission intensities were recorded on a F-7000 FL Spectrophotometer. The excitation wavelength was set at 240 nm, and the emission wavelength was measured over the range of 250–470 nm. Samples were prepared by mixing thiophenol **2a** ( $3.0 \times 10^{-5}$  mol/L) with varying concentration of styrene **1a** and DABCO in EtOH (total volume = 2.0 mL) in a quartz fluorescence cuvette. For each quenching experiment, 1.0 mL of styrene **1a** or DABCO stock solution at different concentration was added to 1.0 mL of the thiophenol solution, yielding a total volume of 2.0 mL. Then the emission

intensity was collected and the data were presented in Figure S5 and S6.

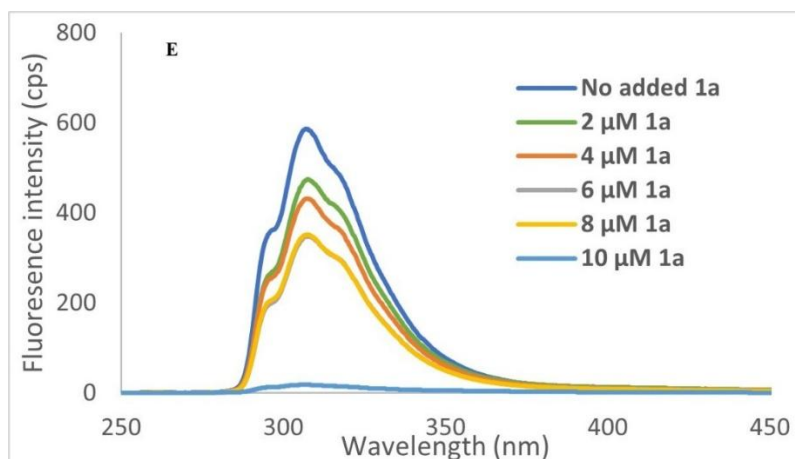

**Fig S5:** Fluorescence emission in the presence of Styrene (**1a**).

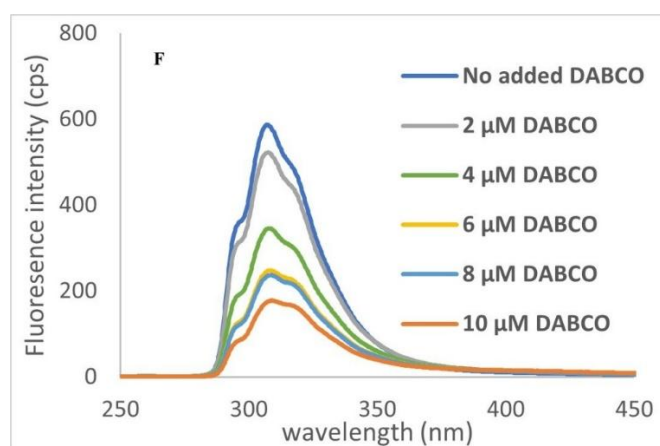

**Fig S6:** Fluorescence emission in the presence of DABCO

### EPR experiments<sup>S1</sup>

**Without Blue-LED irradiation:** A mixture of styrene **1a** (0.5 mmol), thiophenol **2a** (1.0 mmol), DABCO (1.3 equiv.), EtOH (3 mL), and DMPO (12 μL) was prepared and directly analyzed by EPR.

#### Standard reaction Conditions:

A mixture of styrene **1a** (0.5 mmol), thiophenol **2a** (1.0 mmol), DABCO (1.3 equiv.), EtOH (3 mL), and DMPO (12 μL) was stirred under Blue LED irradiation under oxygen atmosphere at room temperature. Aliquots were taken and analyzed by EPR after 1, 5, 10, 15, and 30 minutes of irradiation.

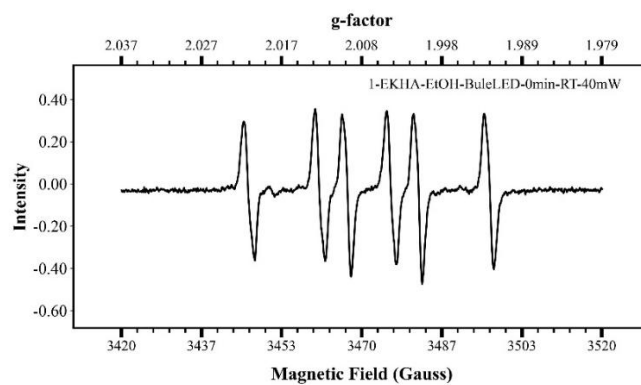

**Fig S7:** EPR Without Blue-LED irradiation

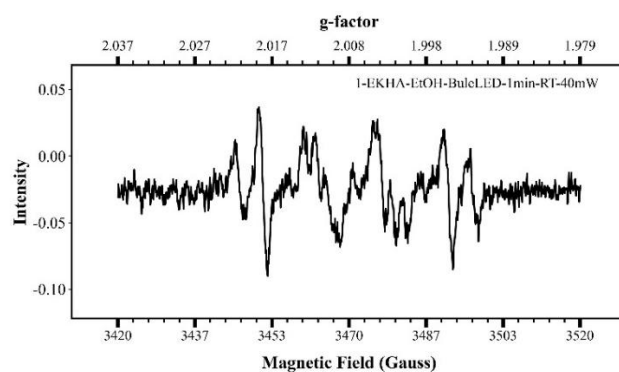

**Fig S8:** EPR under Blue-LED irradiation after 1 min.

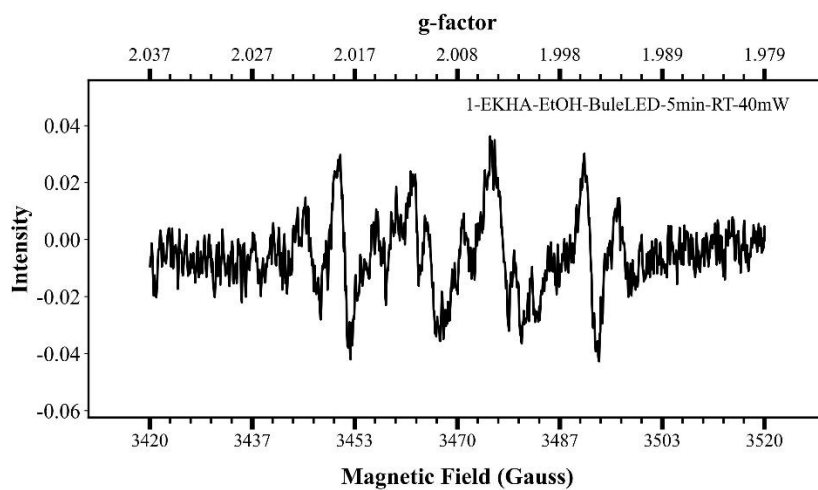

**Fig S9:** EPR under Blue-LED irradiation after 5 min.

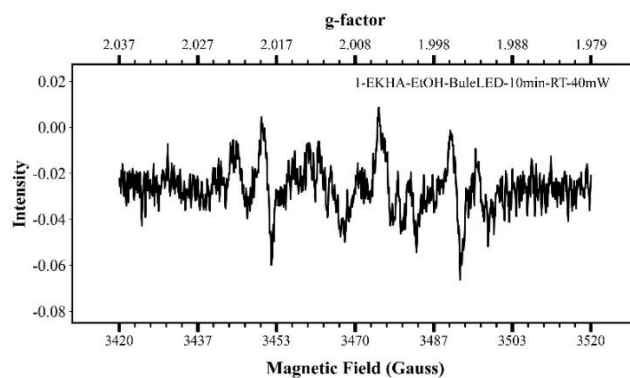

**Fig S9:** EPR under Blue-LED irradiation after 10 min.

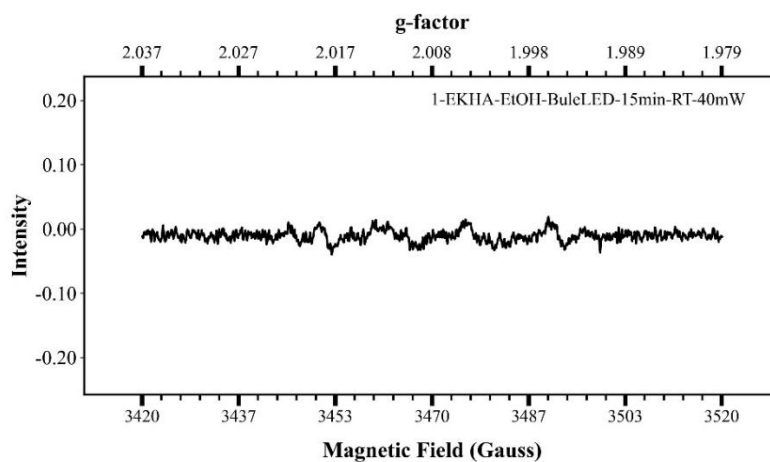

**Fig S10:** EPR under Blue-LED irradiation after 15 min.

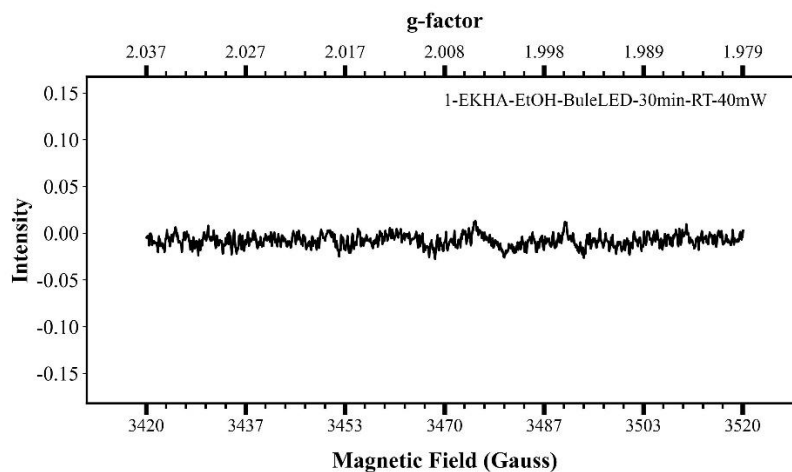

**Fig S11:** EPR under Blue-LED irradiation after 30 min.

## References:

S1 (a) H. Ruan, L.-G. Meng, L. Zhu and L. Wang, *Adv. Synth. Catal.*, 2019, **361**, 3217; (b) Z. Chen, F. Xue, T. Liu, B. Wang, Y. Zhang, W. Jin, Y. Xia, and C. Liu, *Green Chem.*, 2022, **24**, 3250; (c) J. Shi, X. W. Gao, Q. X. Tong, and J. J. Zhong, *J. Org. Chem.*, 2021, **86**, 12922; (d) J. E. Hong, Y. Jung, D. Min, M. Jang, S. Kim, J. Park, and Y. Park, *J. Org. Chem.*, 2022, **87**, 7378; (e) A. Das, and K. J. Thomas, *ACS omega*, 2023, **8**, 18275. (f) Z. Xing, M. Yang, H. Sun, Z. Wang, P. Chen, L. Liu, X. Wang, X. Xie and X. She, *Green Chem.*, 2018, **20**, 5117.

**Copies of  $^1\text{H}$ ,  $^{13}\text{C}$ ,  $^{19}\text{F}$ -NMR and Mass**

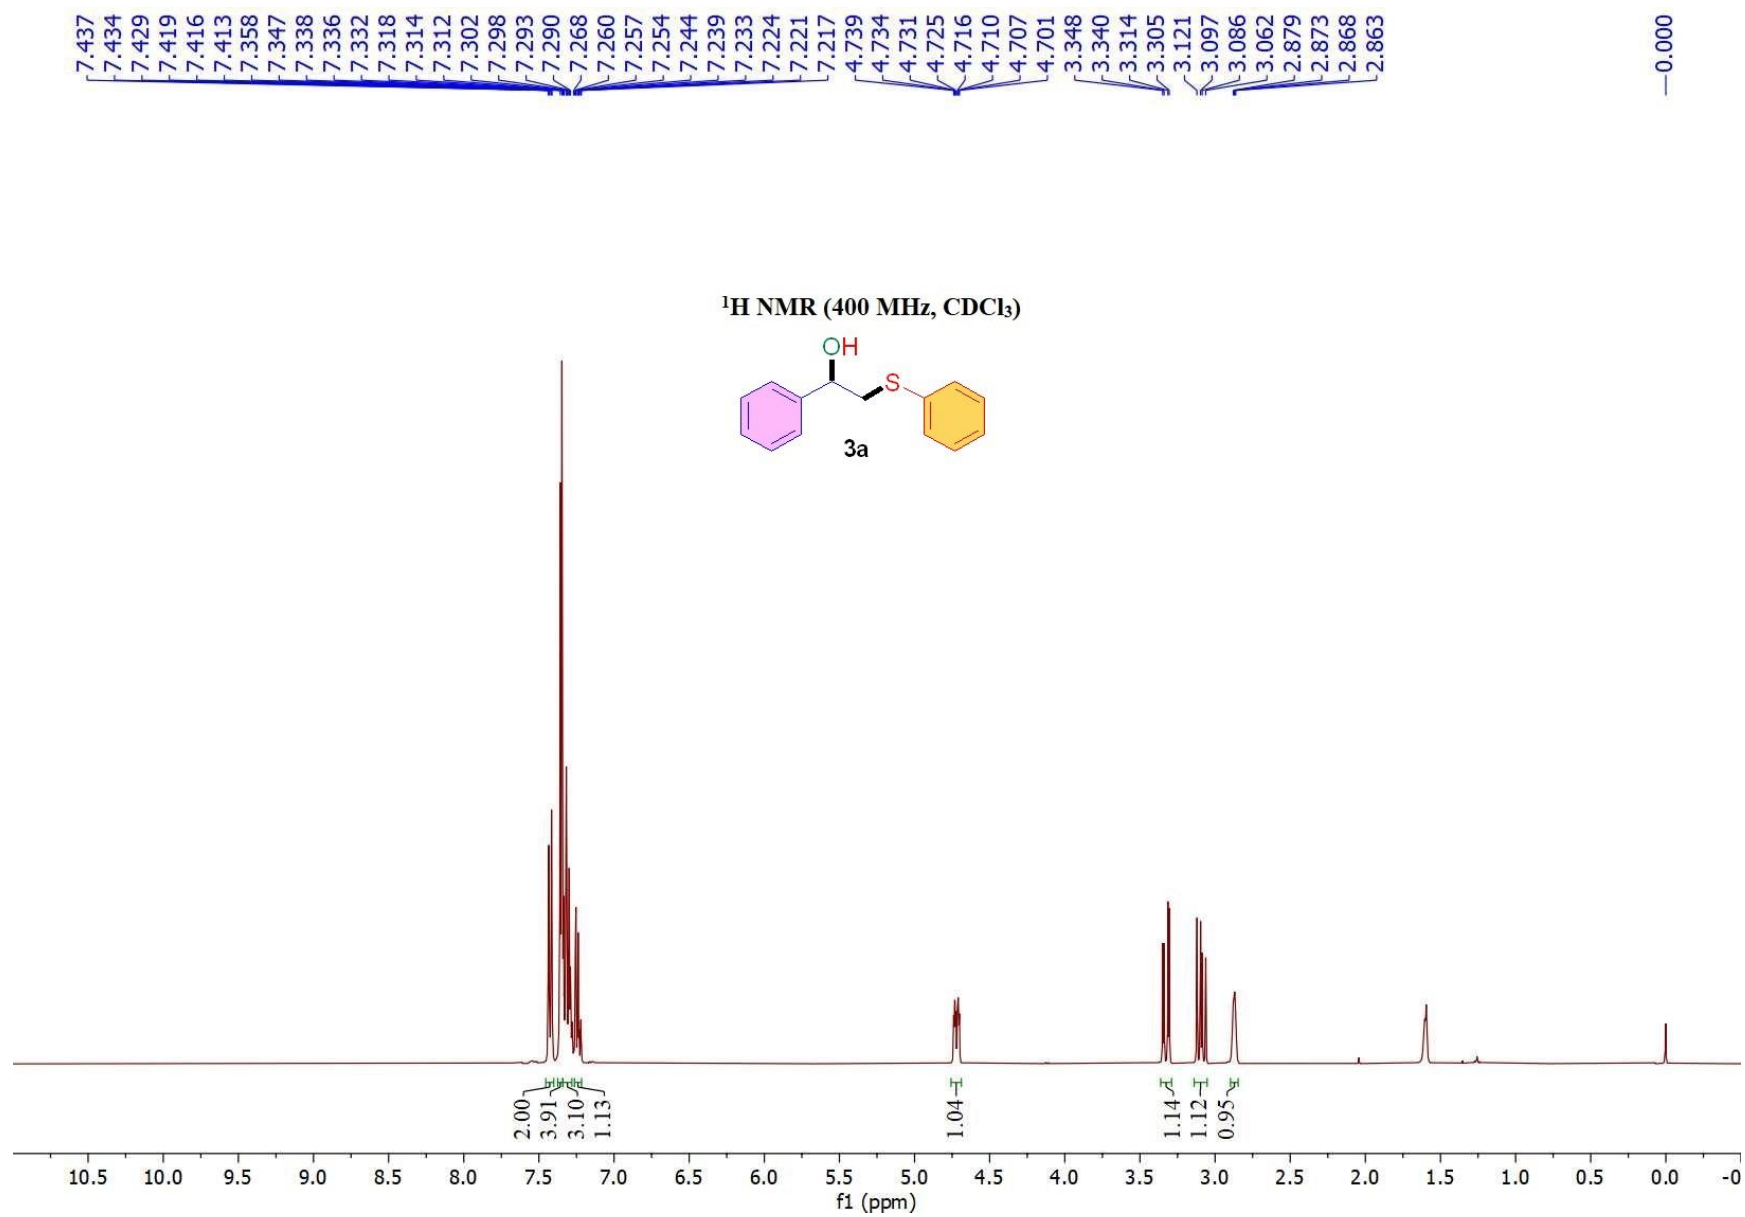

142.16  
134.86  
130.27  
129.22  
128.64  
128.08  
126.87  
125.91

77.42  
77.10  
76.78  
71.65

44.06

$^{13}\text{C}\{\text{H}\}$  NMR (100 MHz,  $\text{CDCl}_3$ )

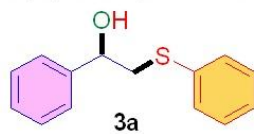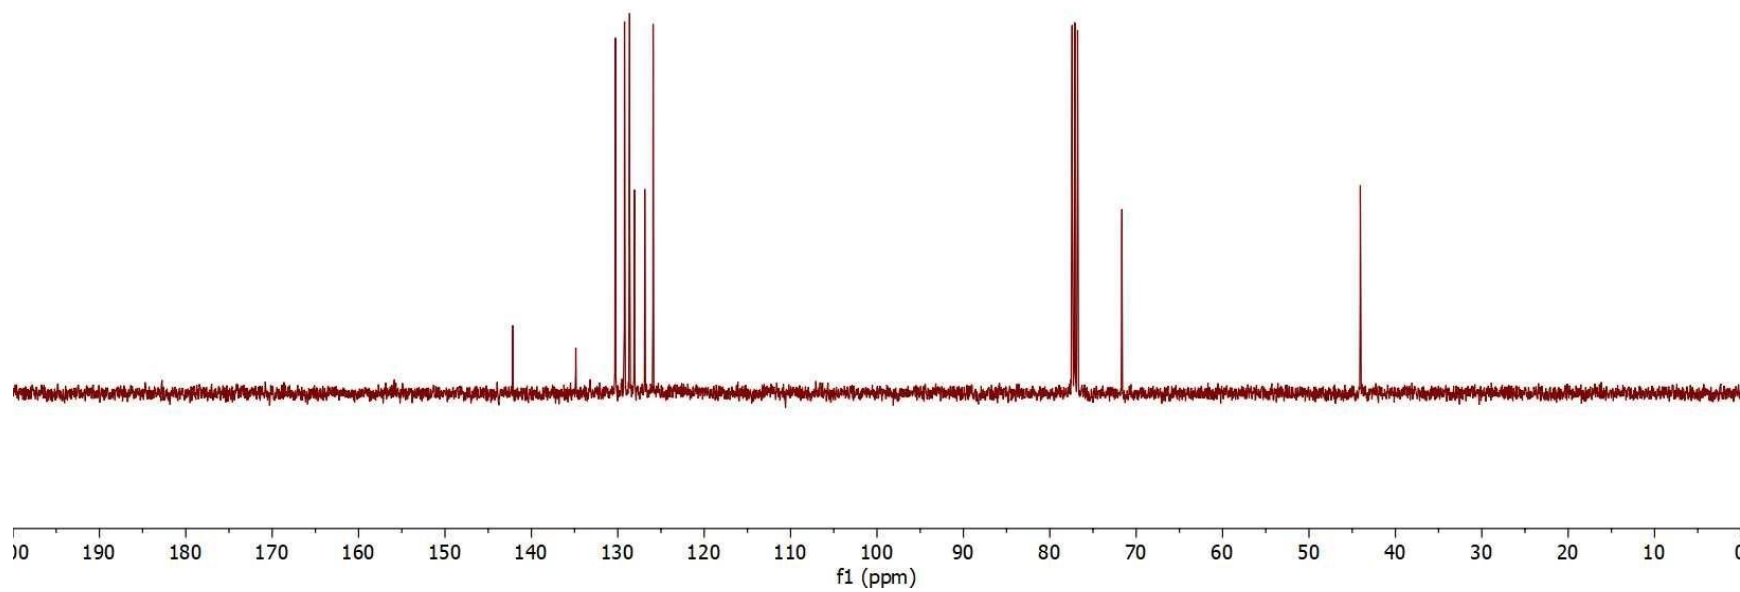

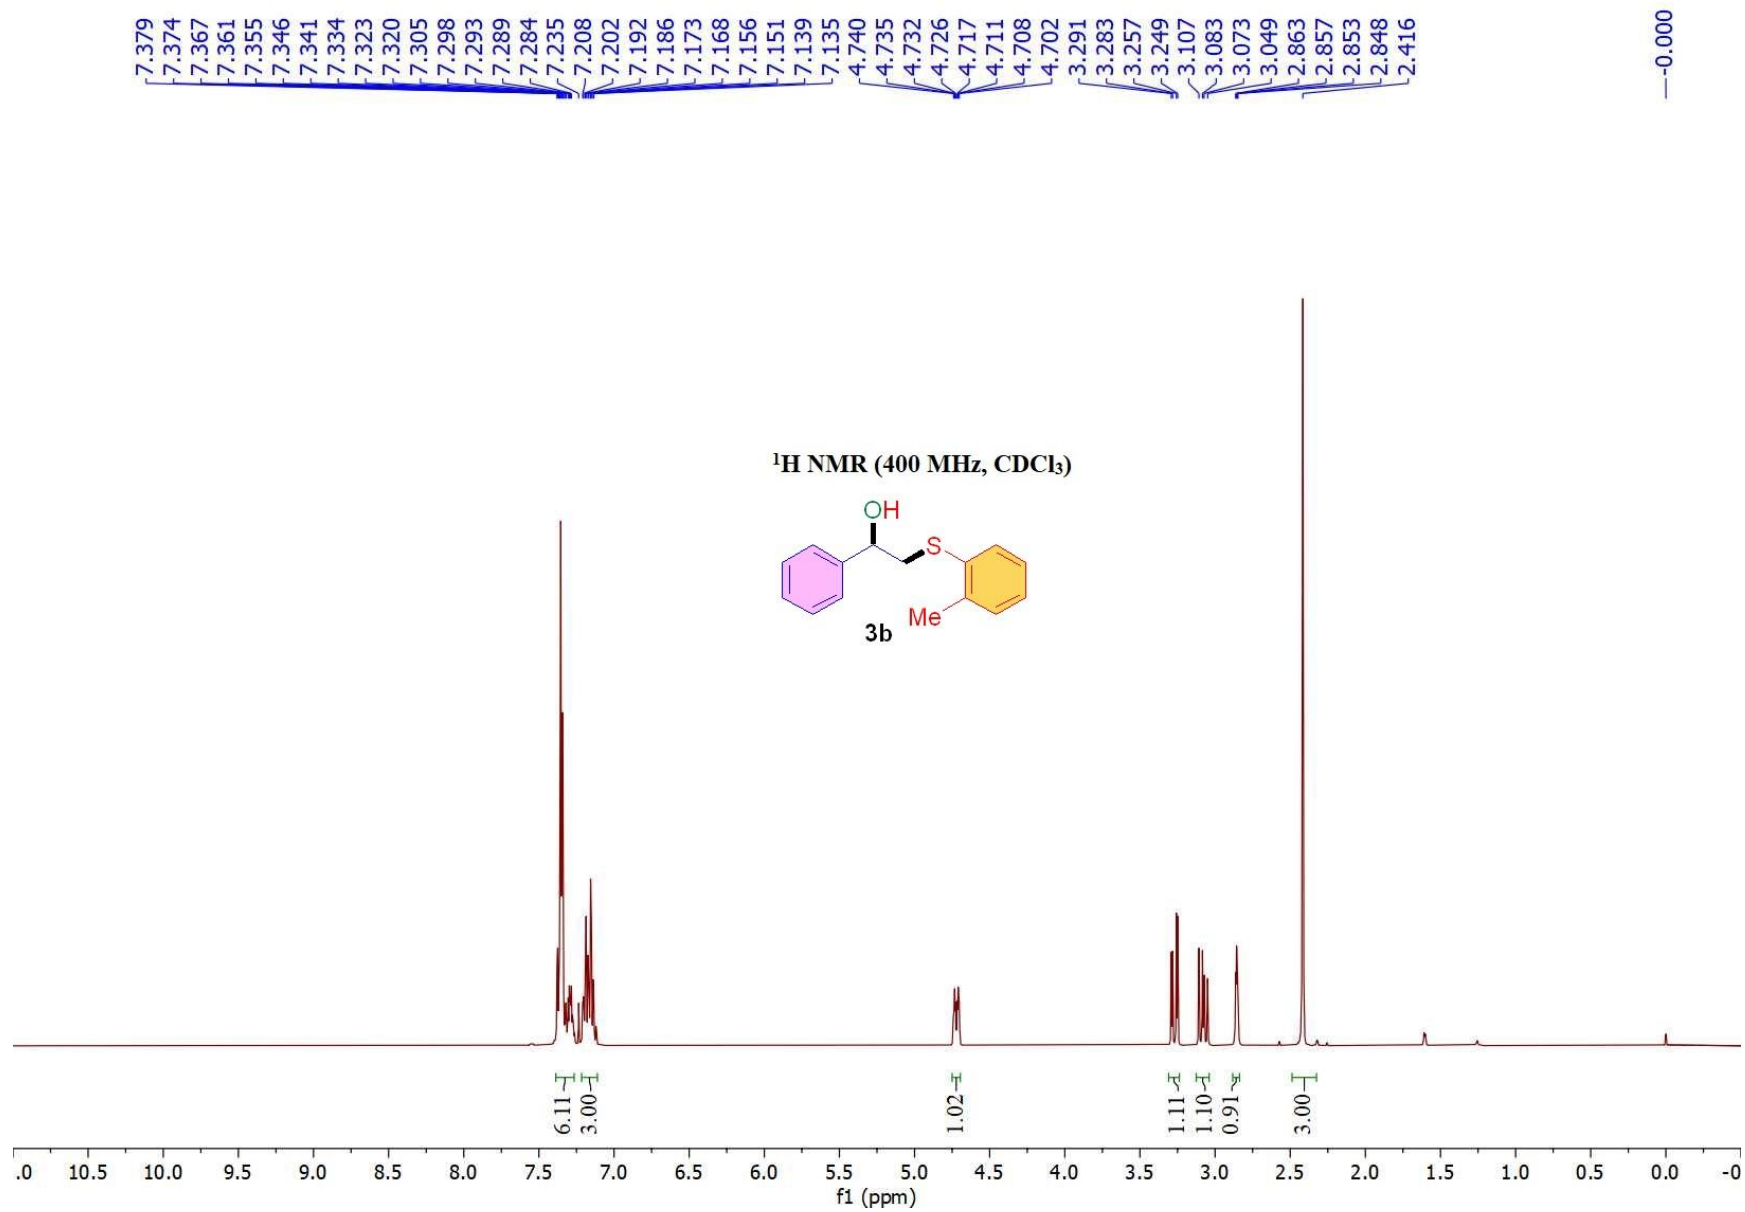

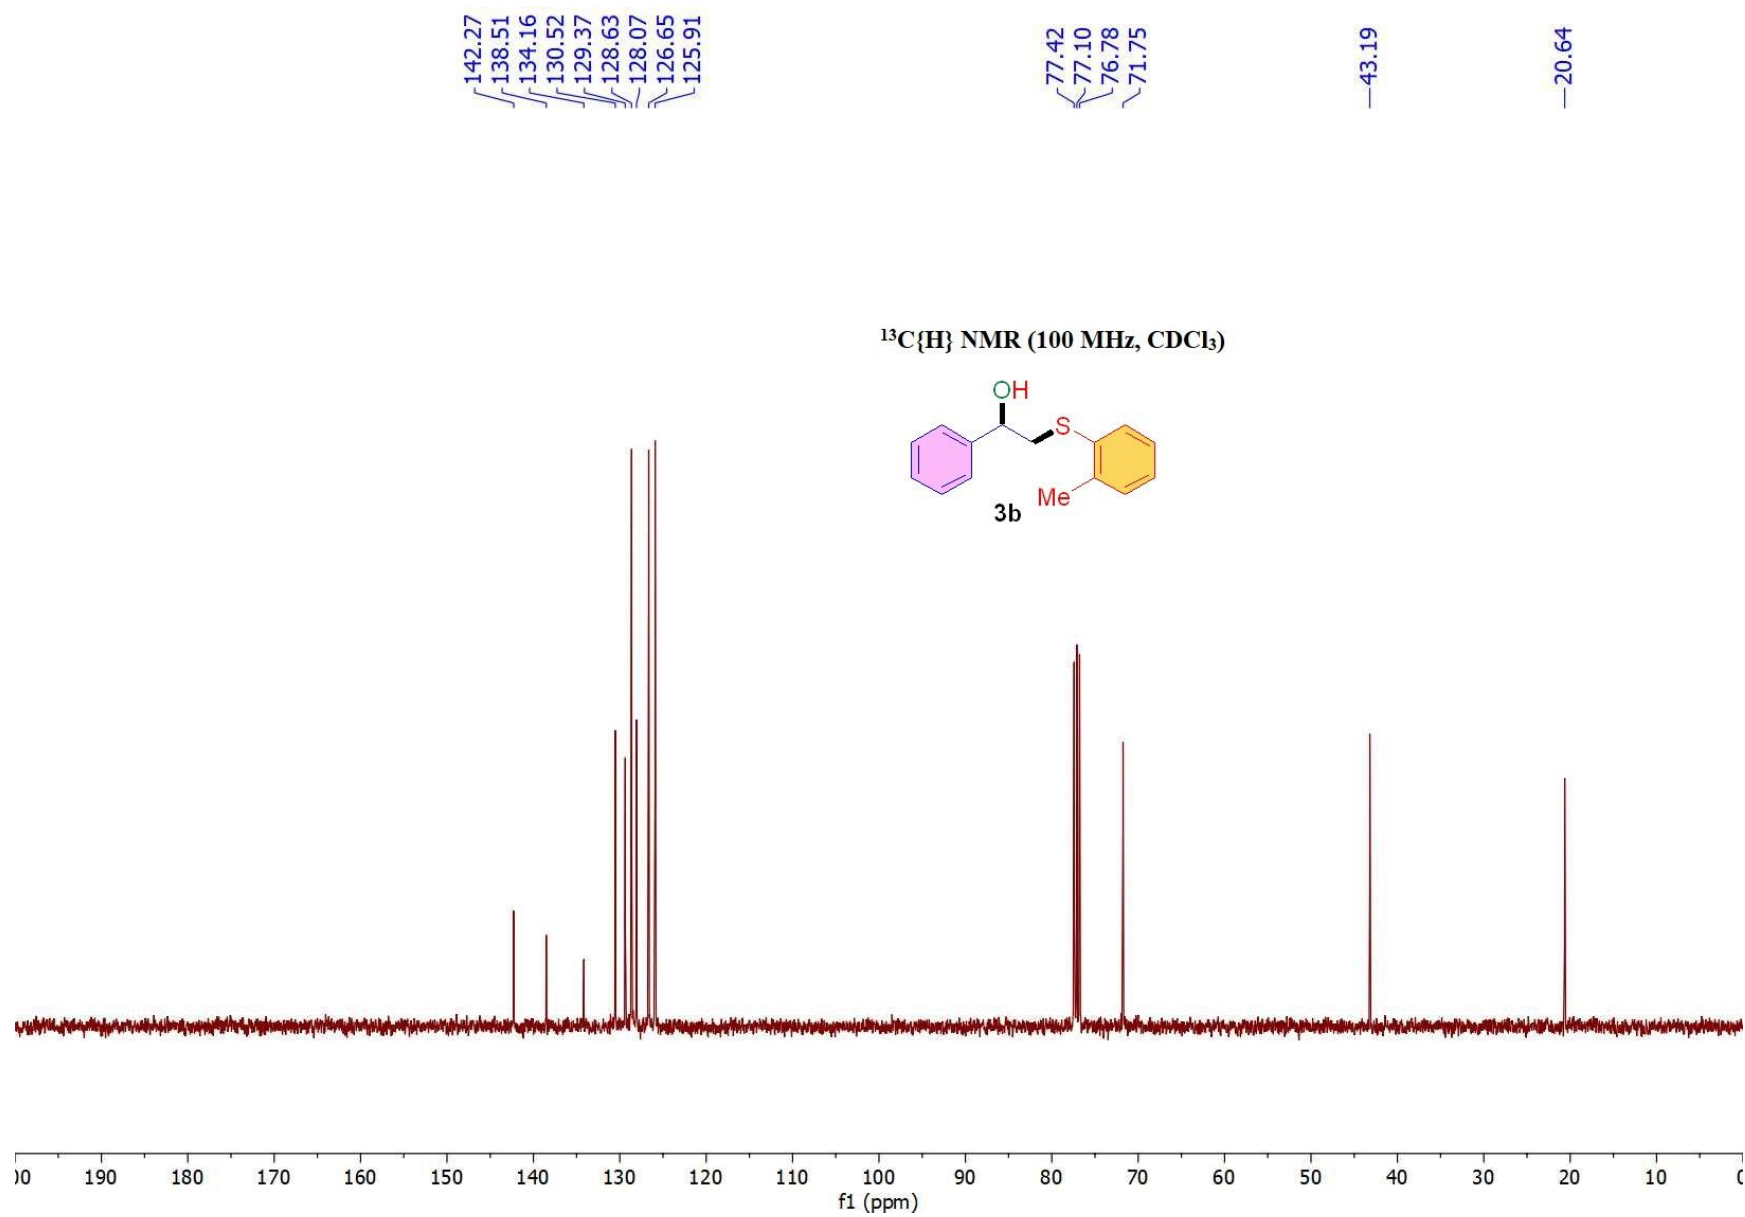

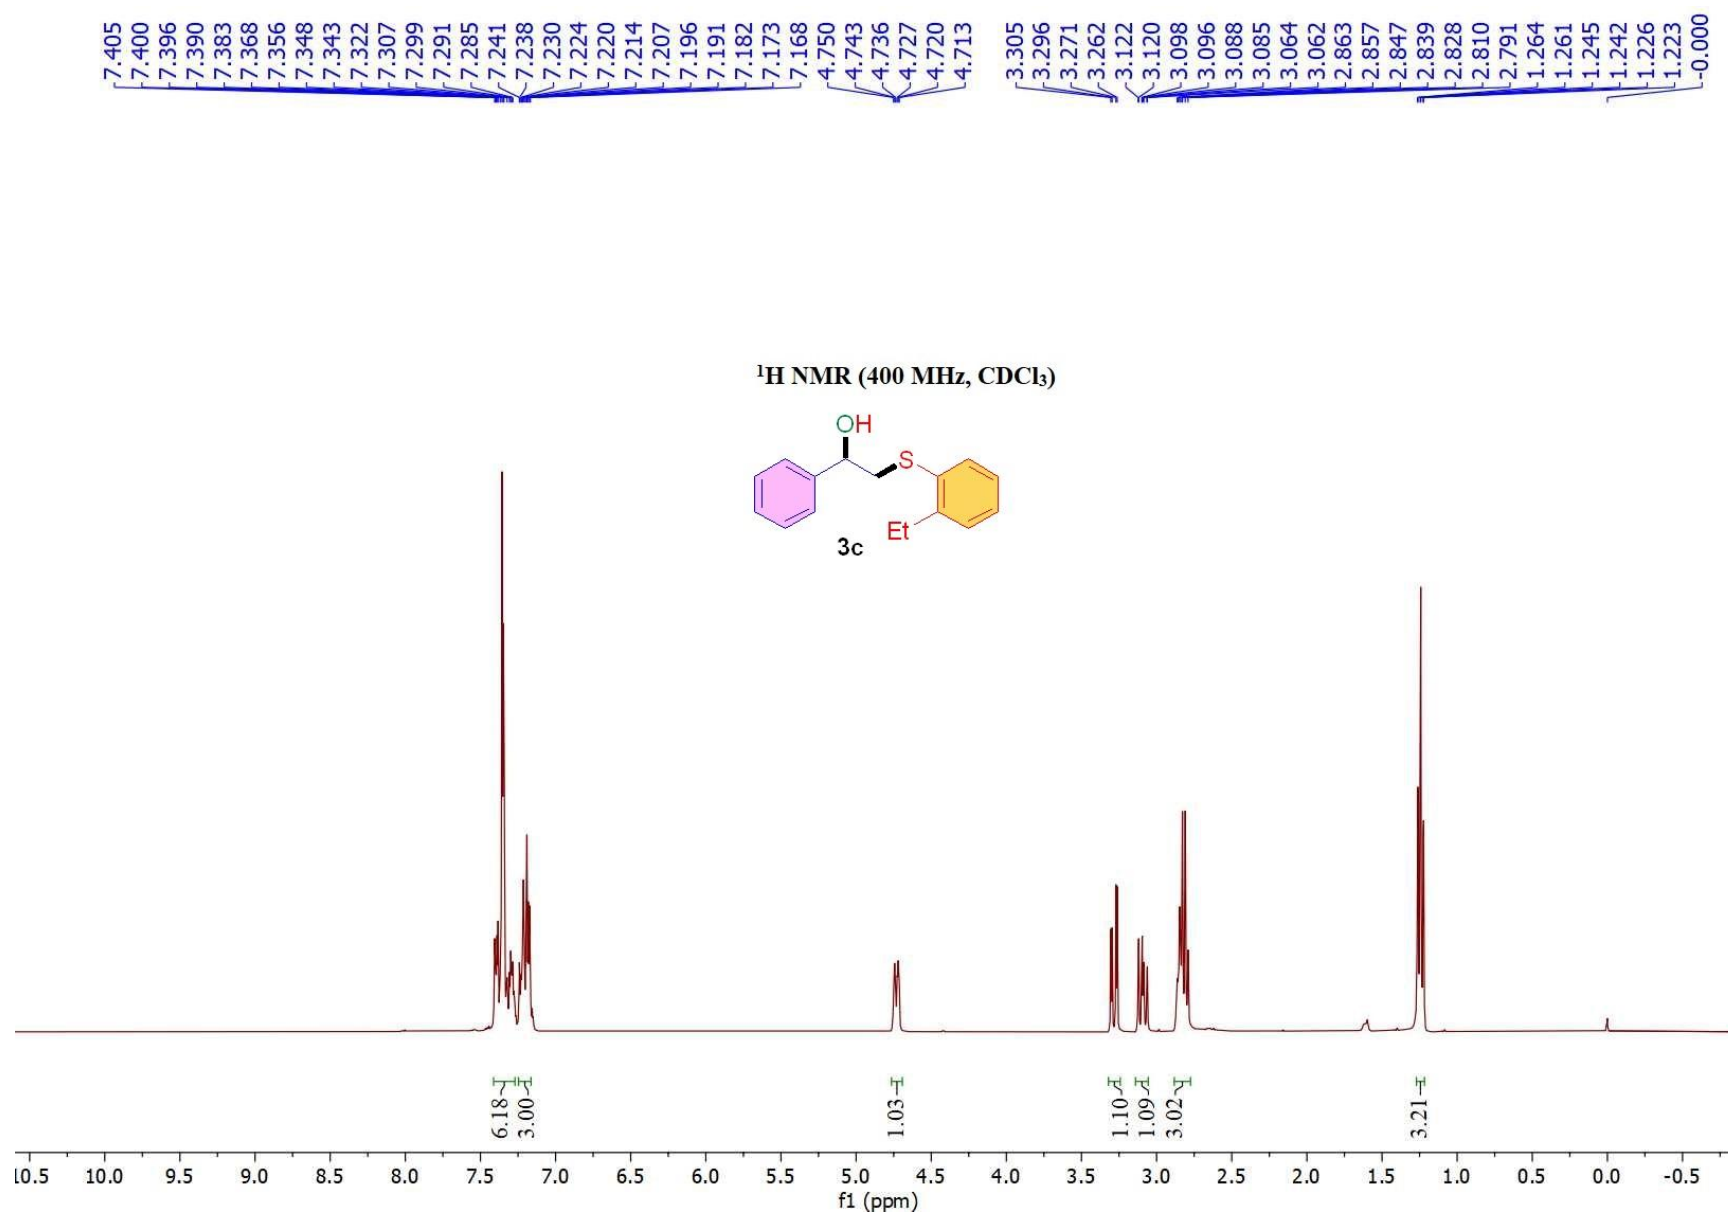

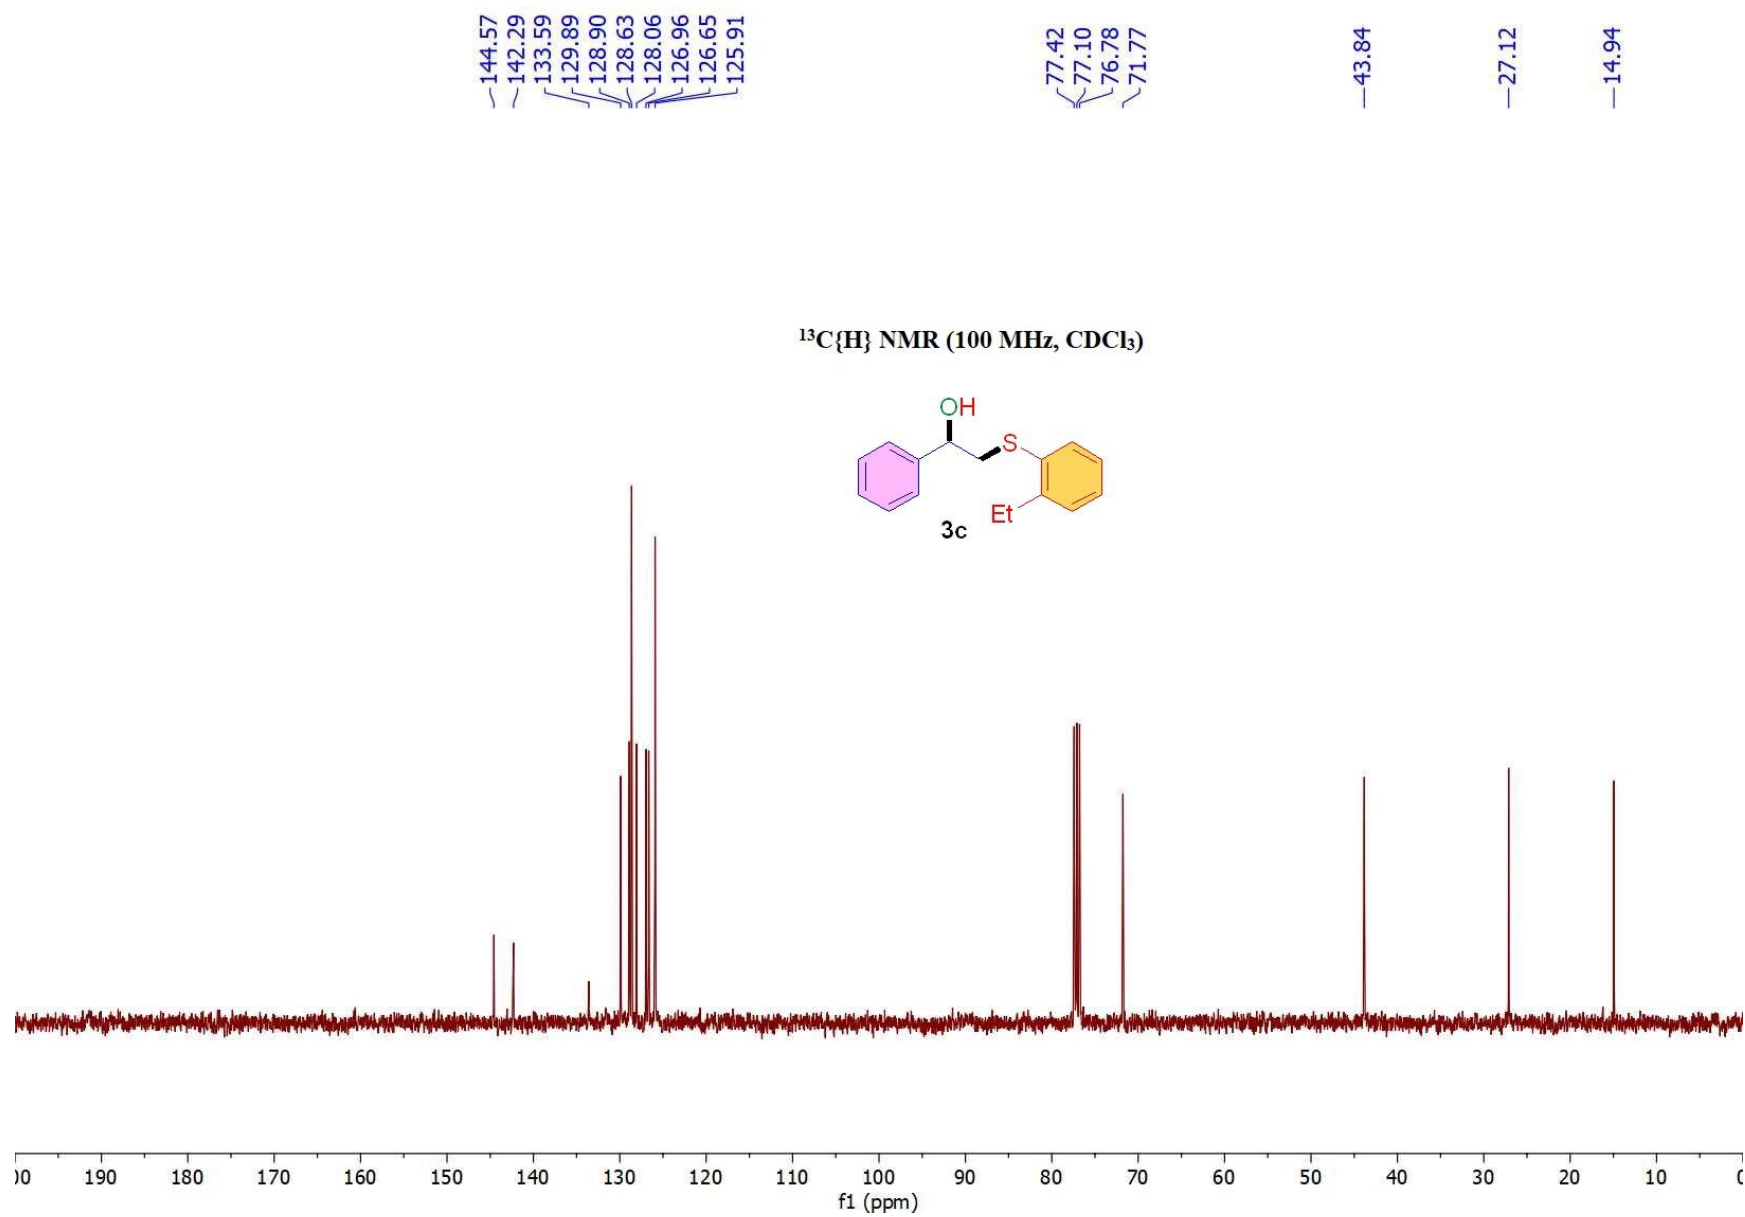

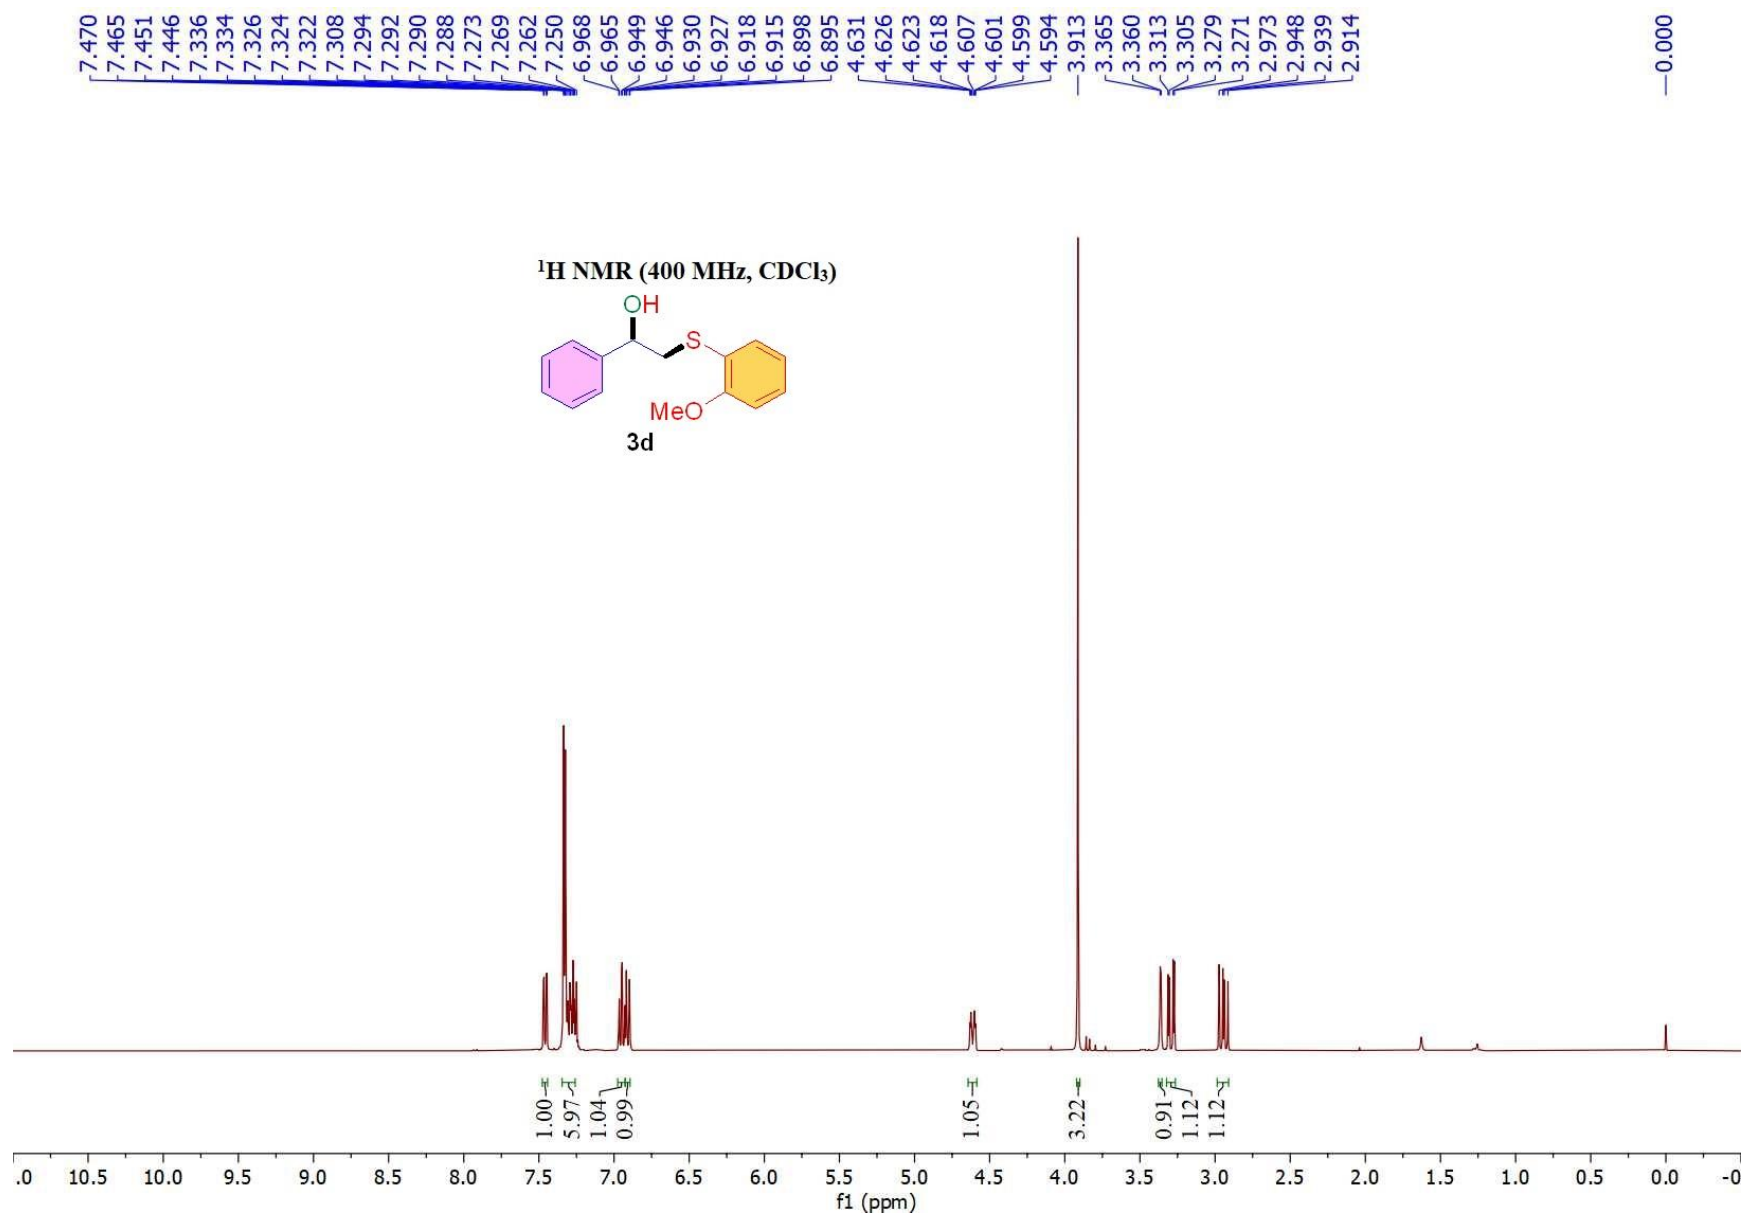

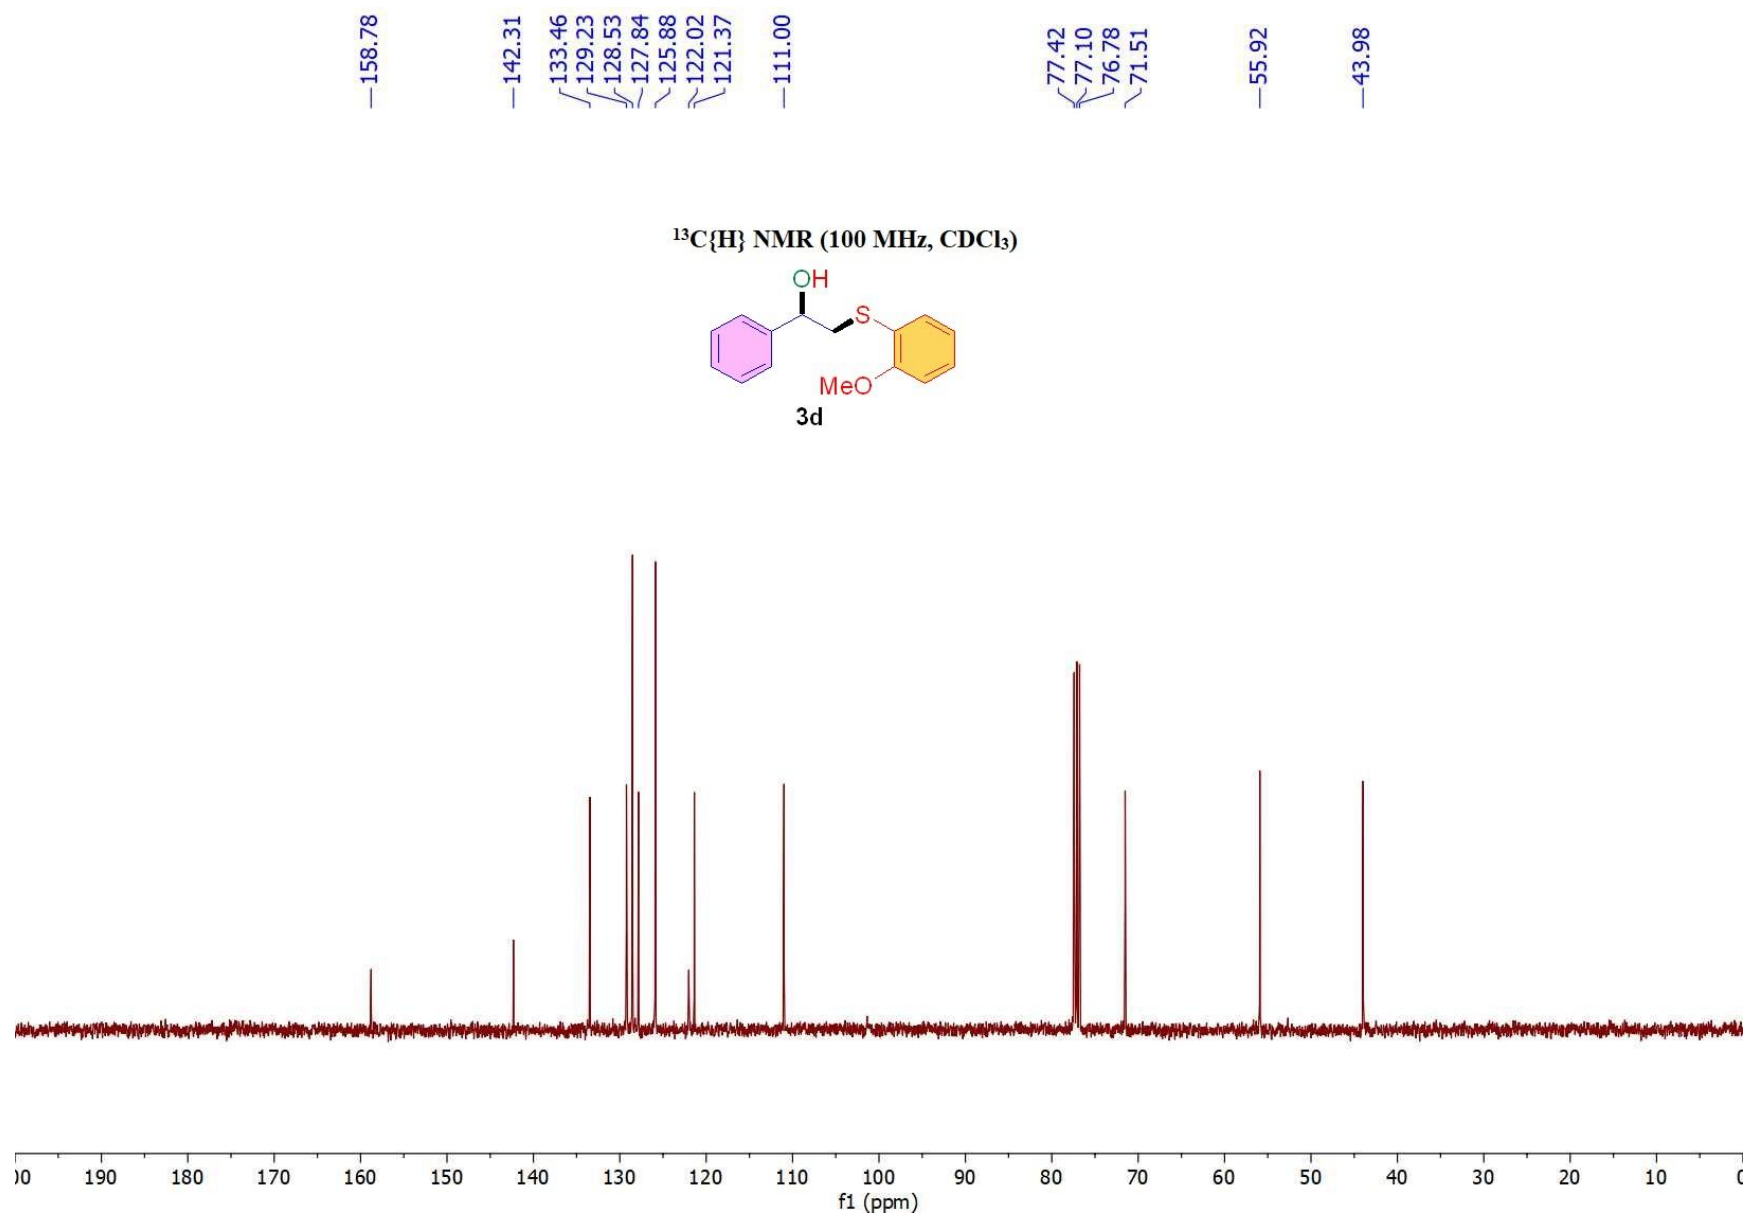

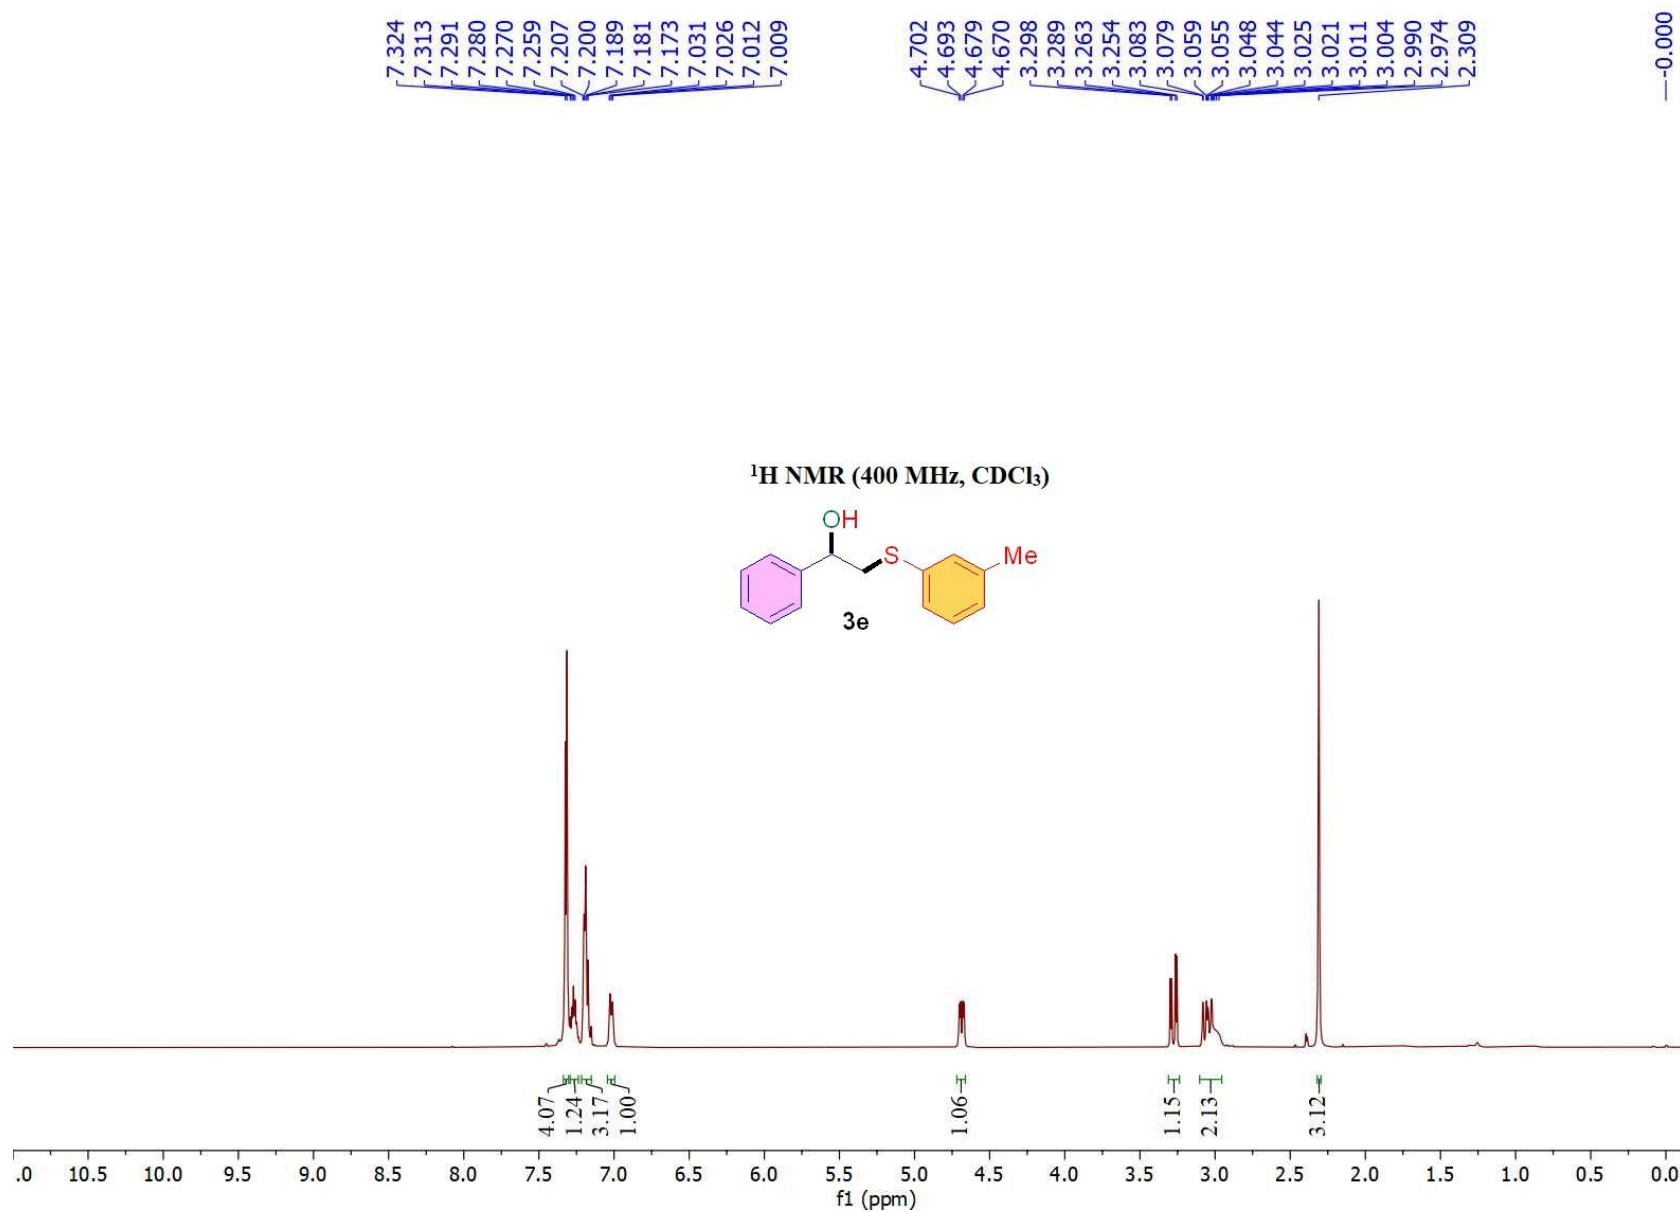

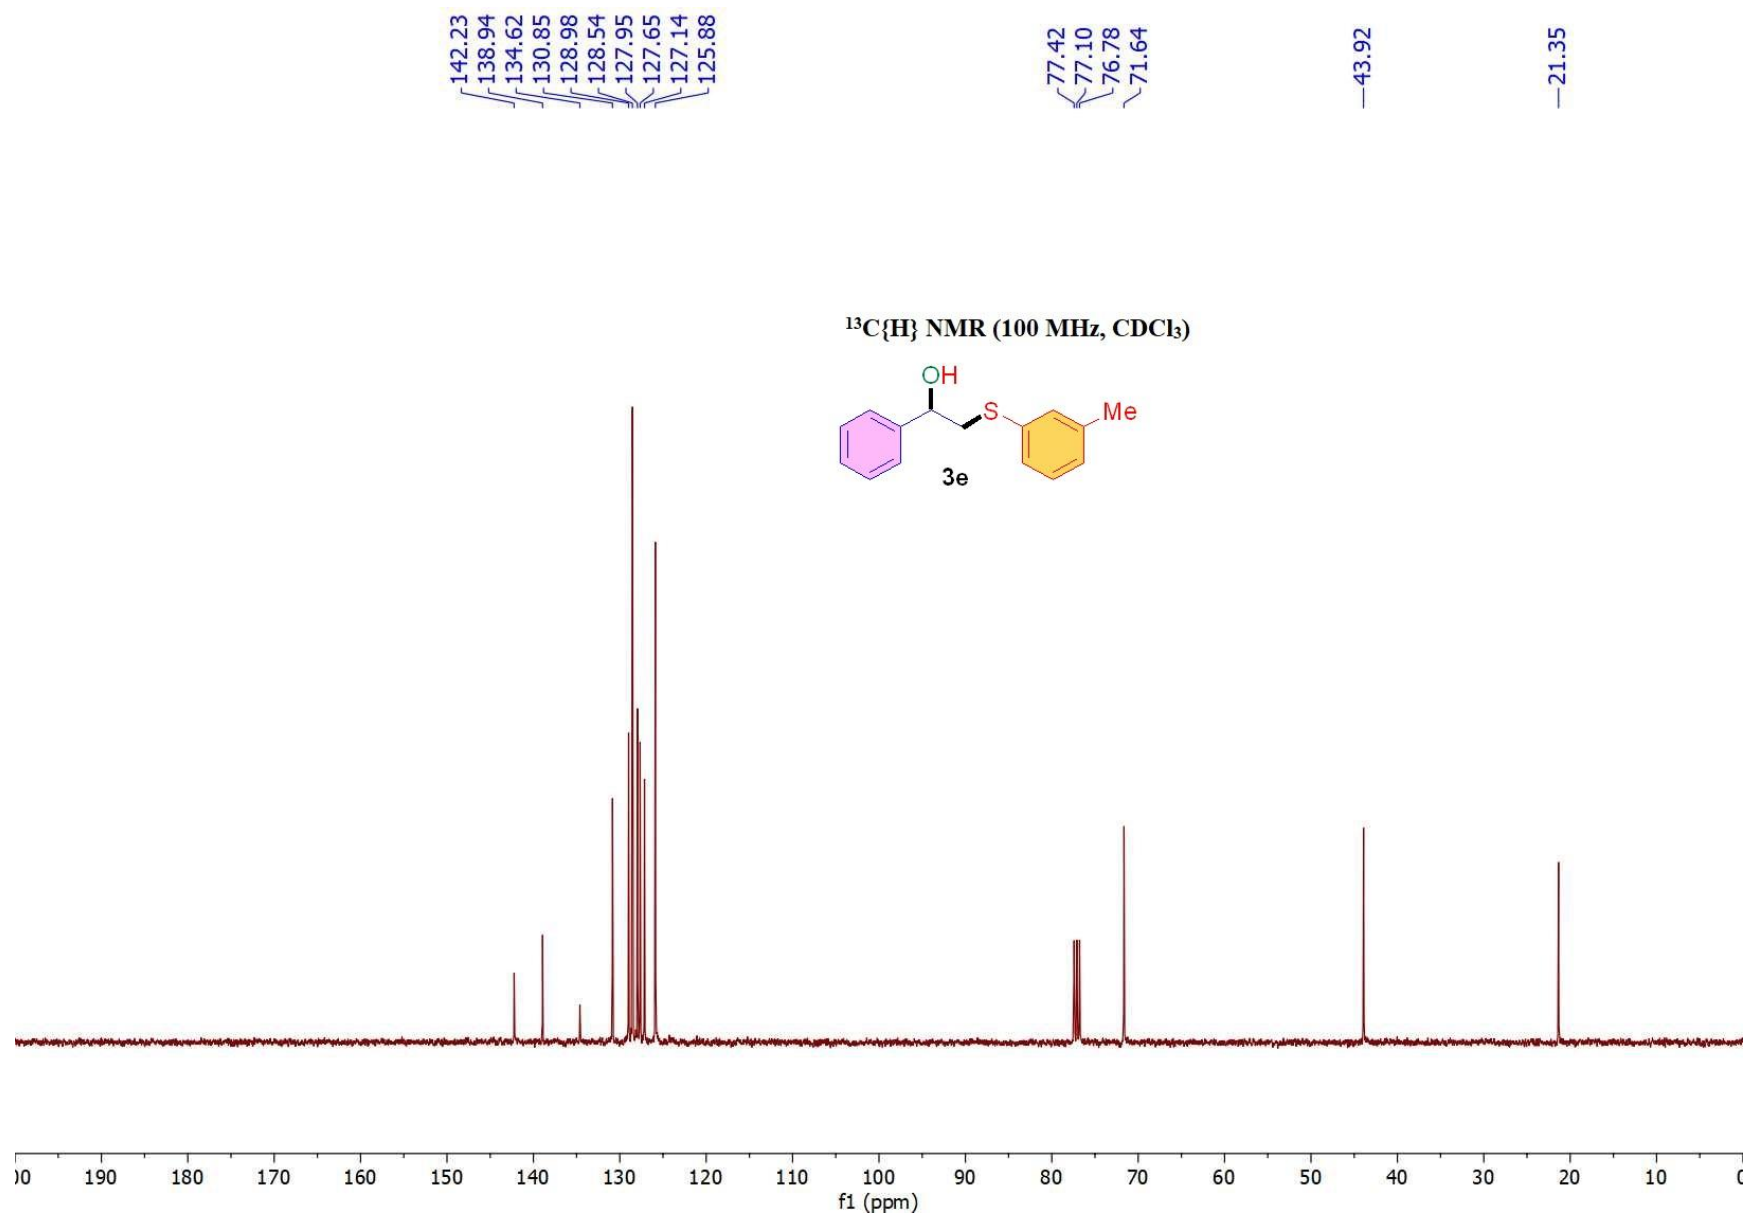

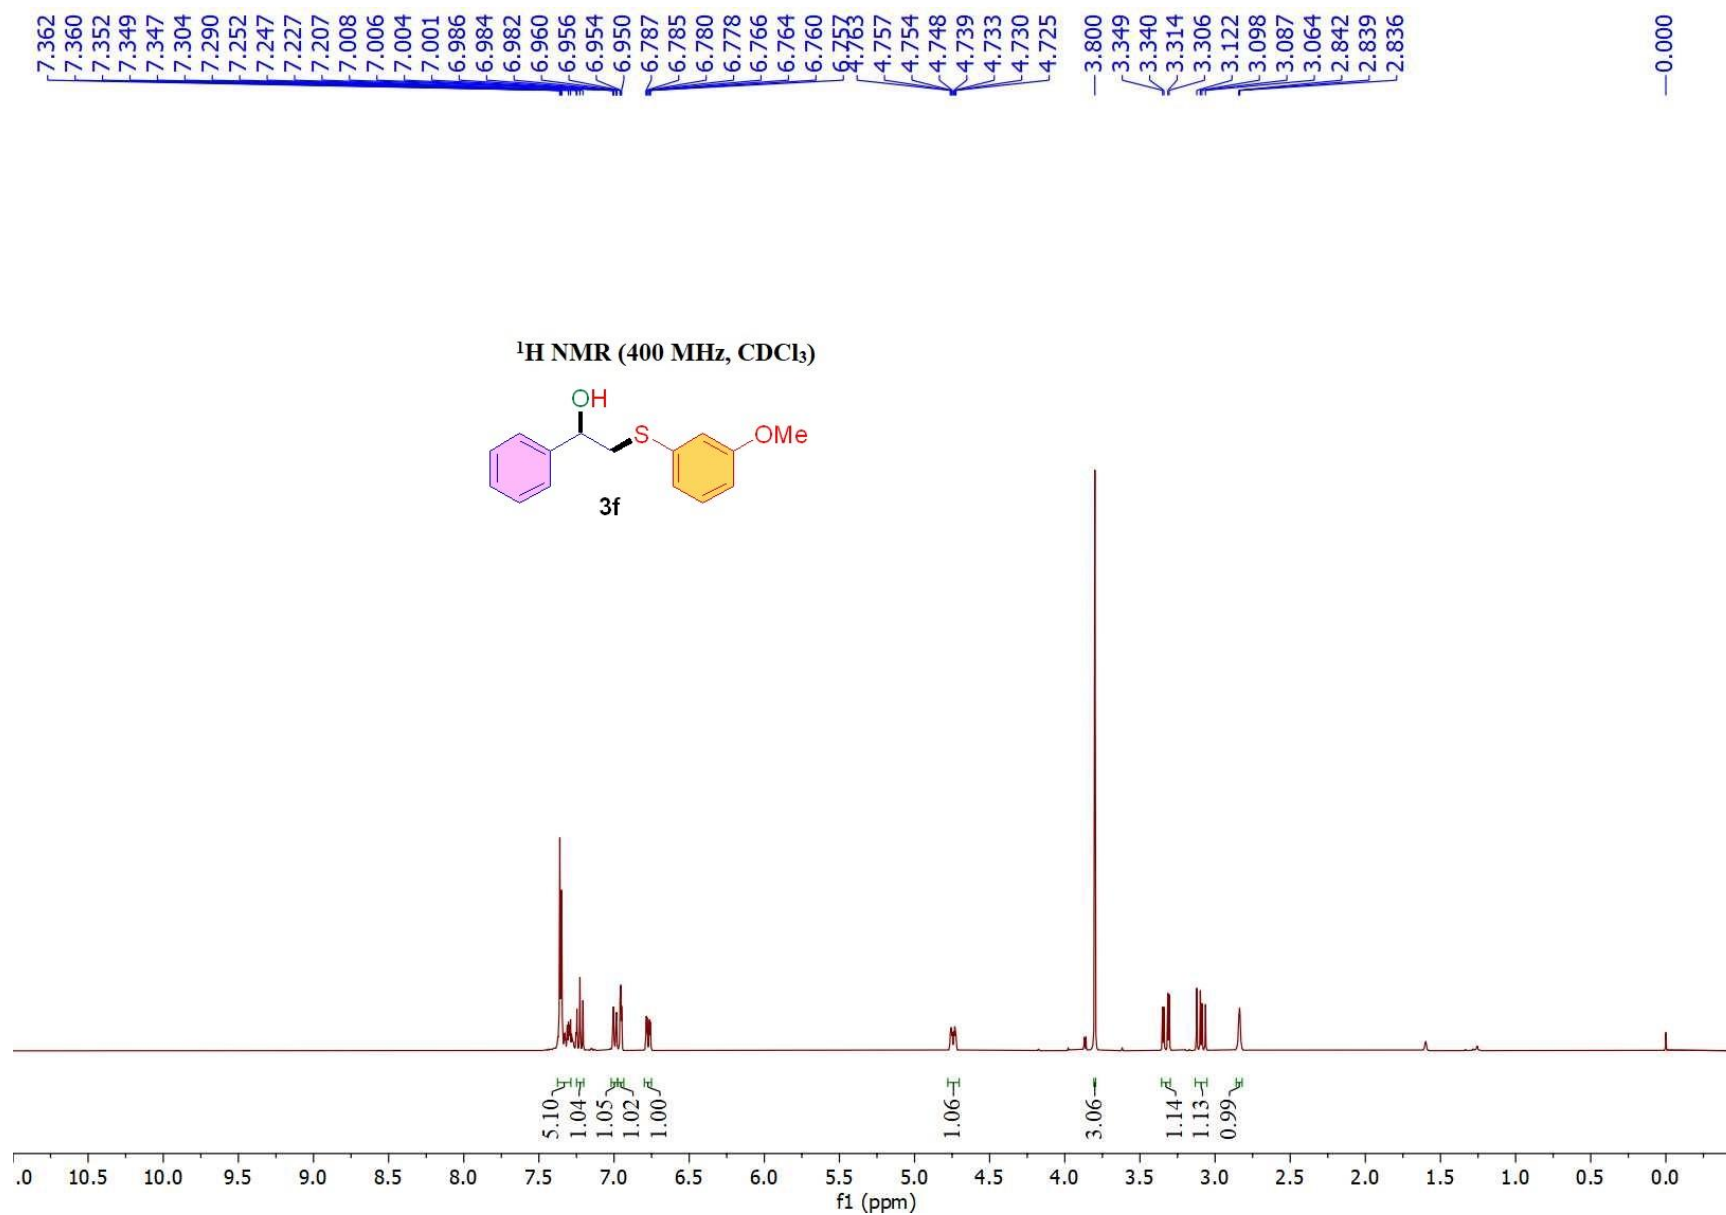

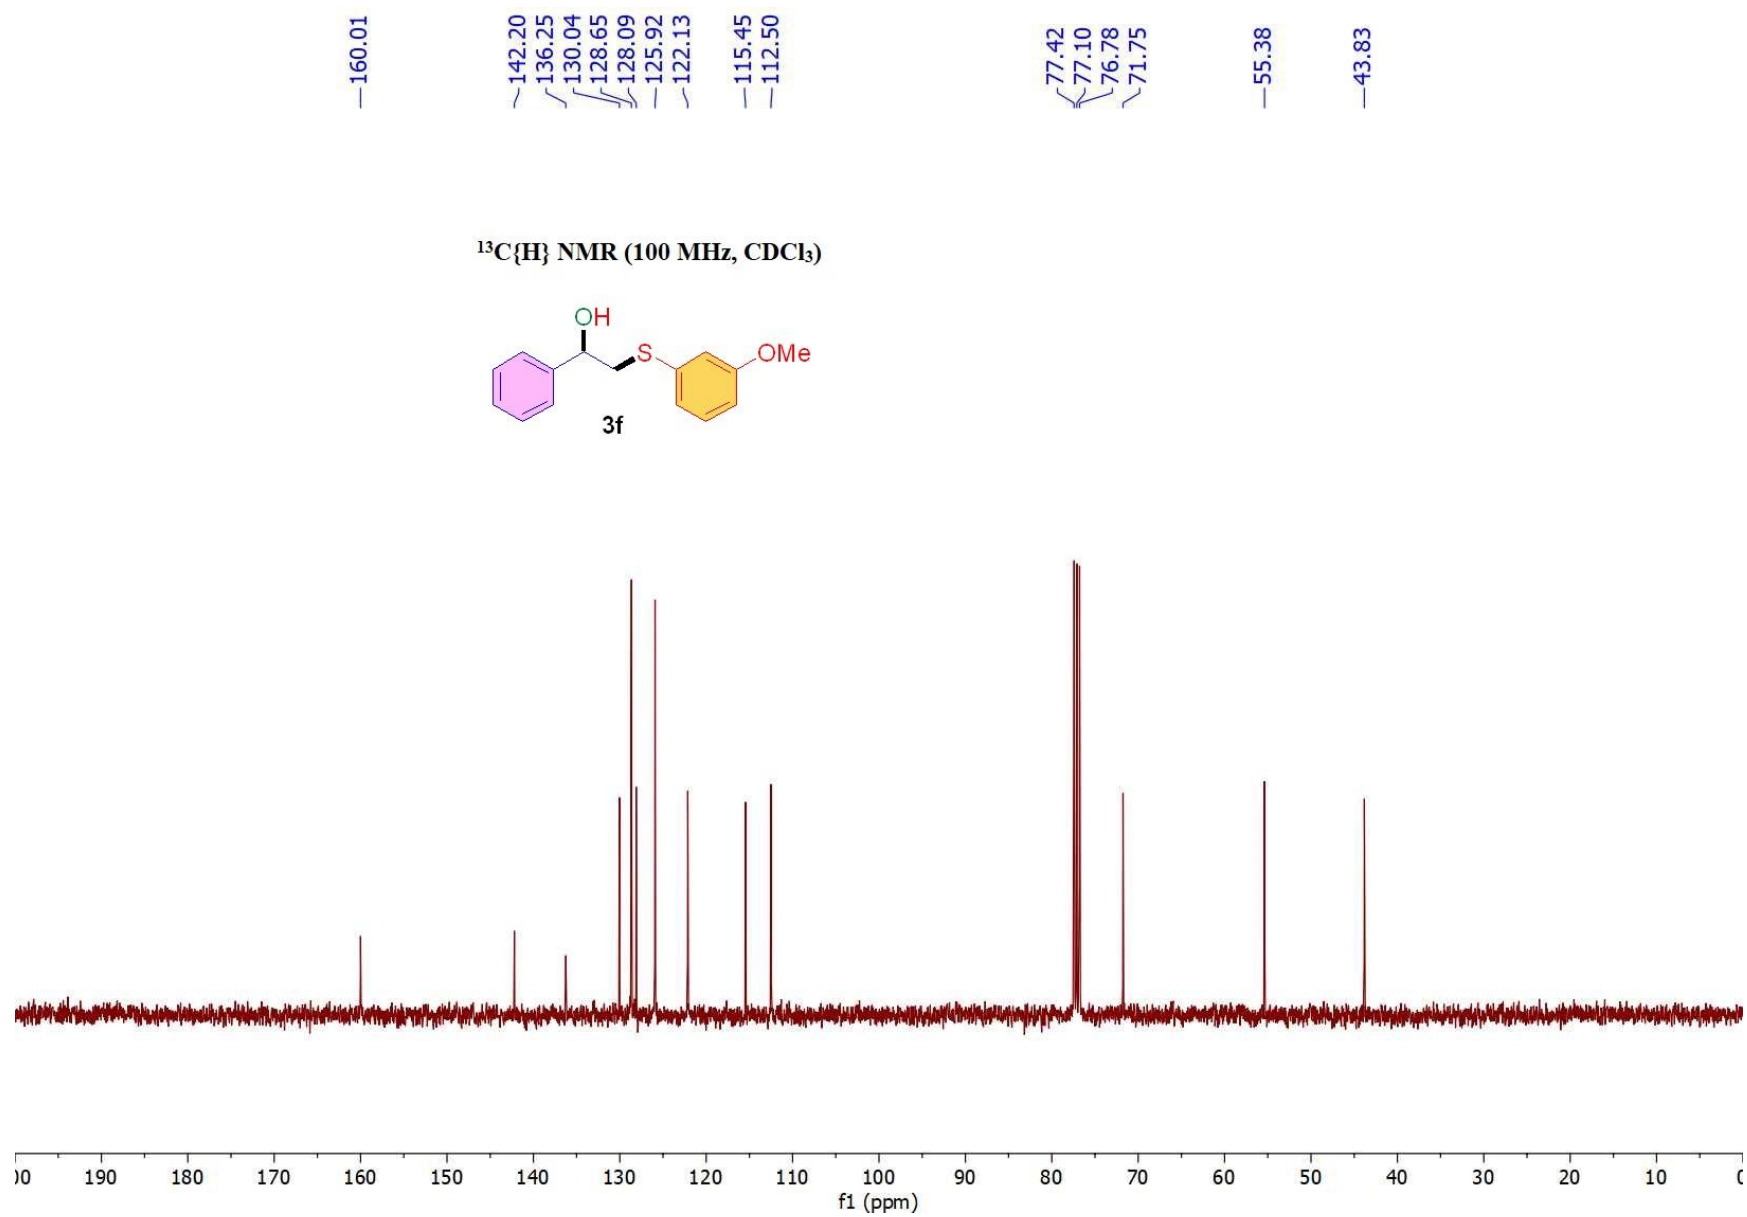

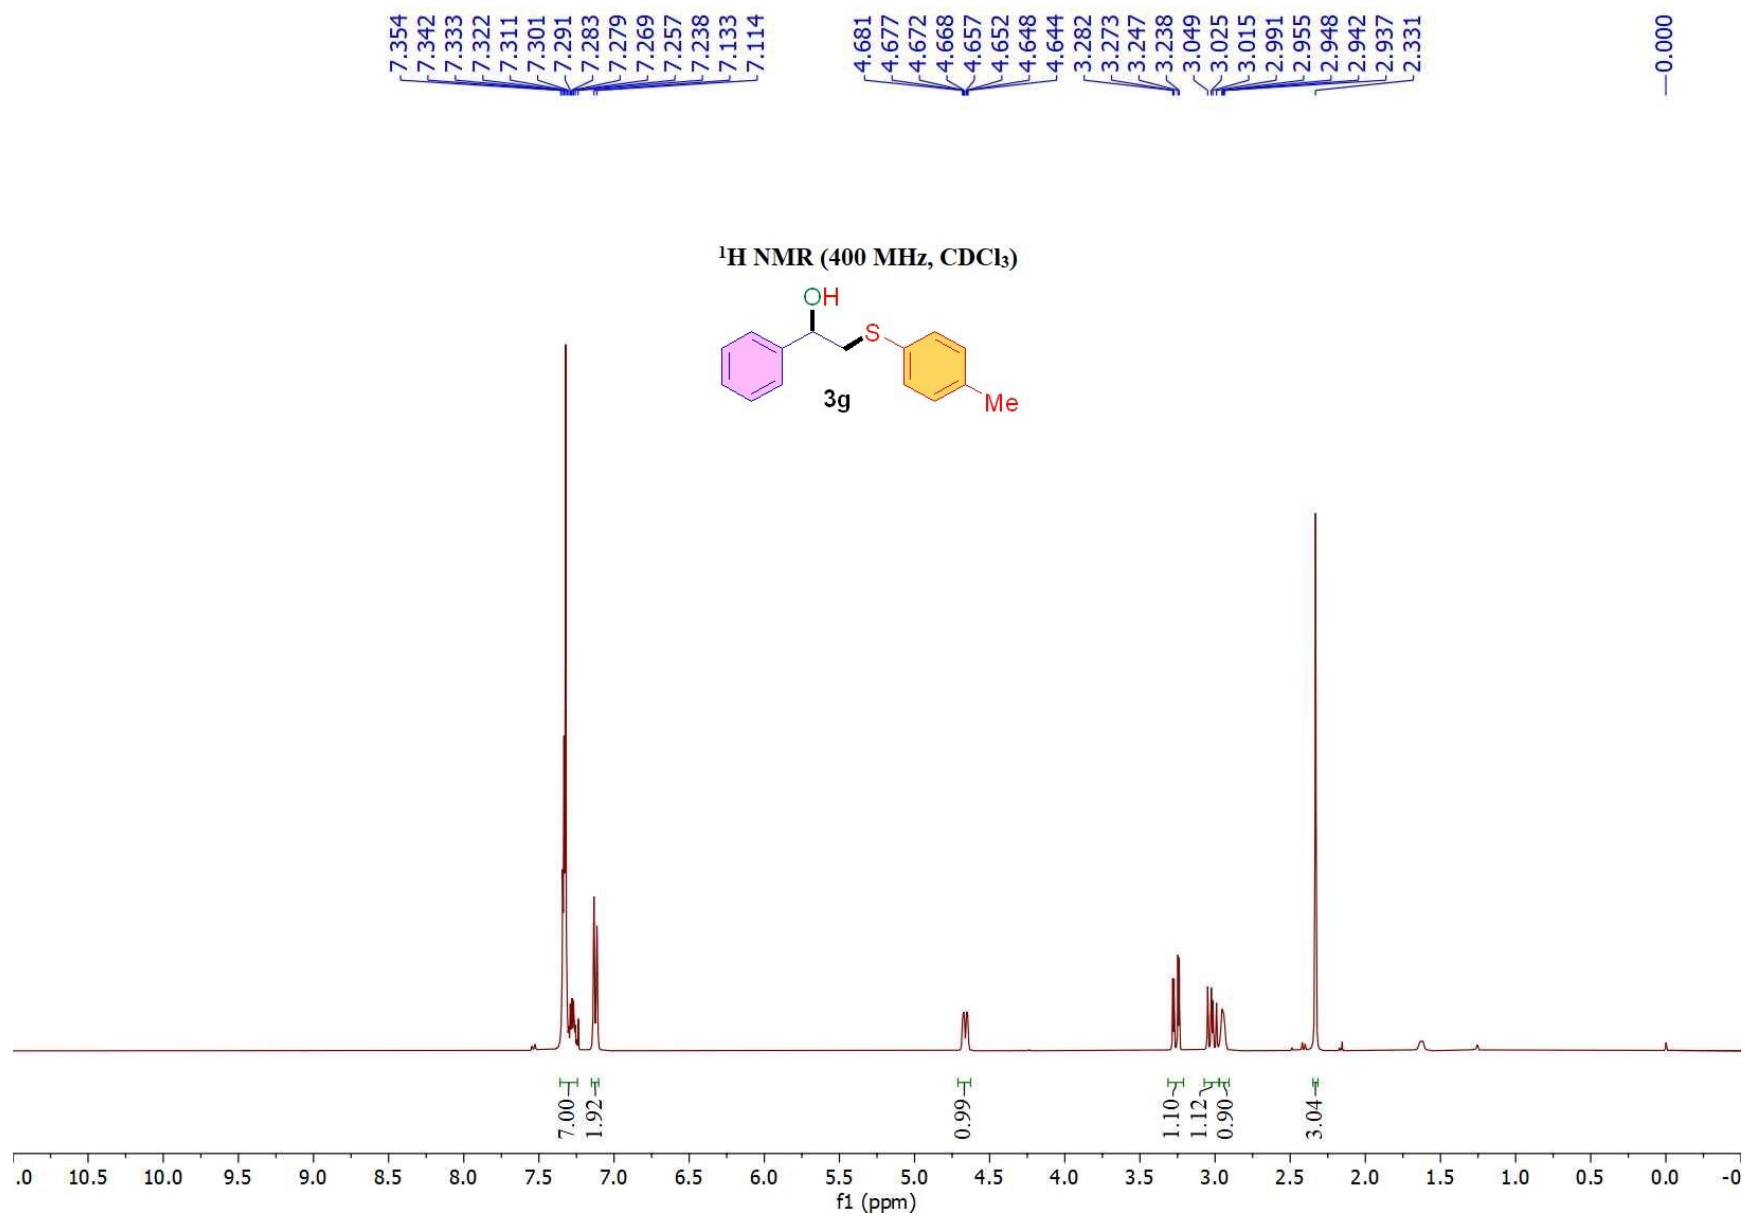

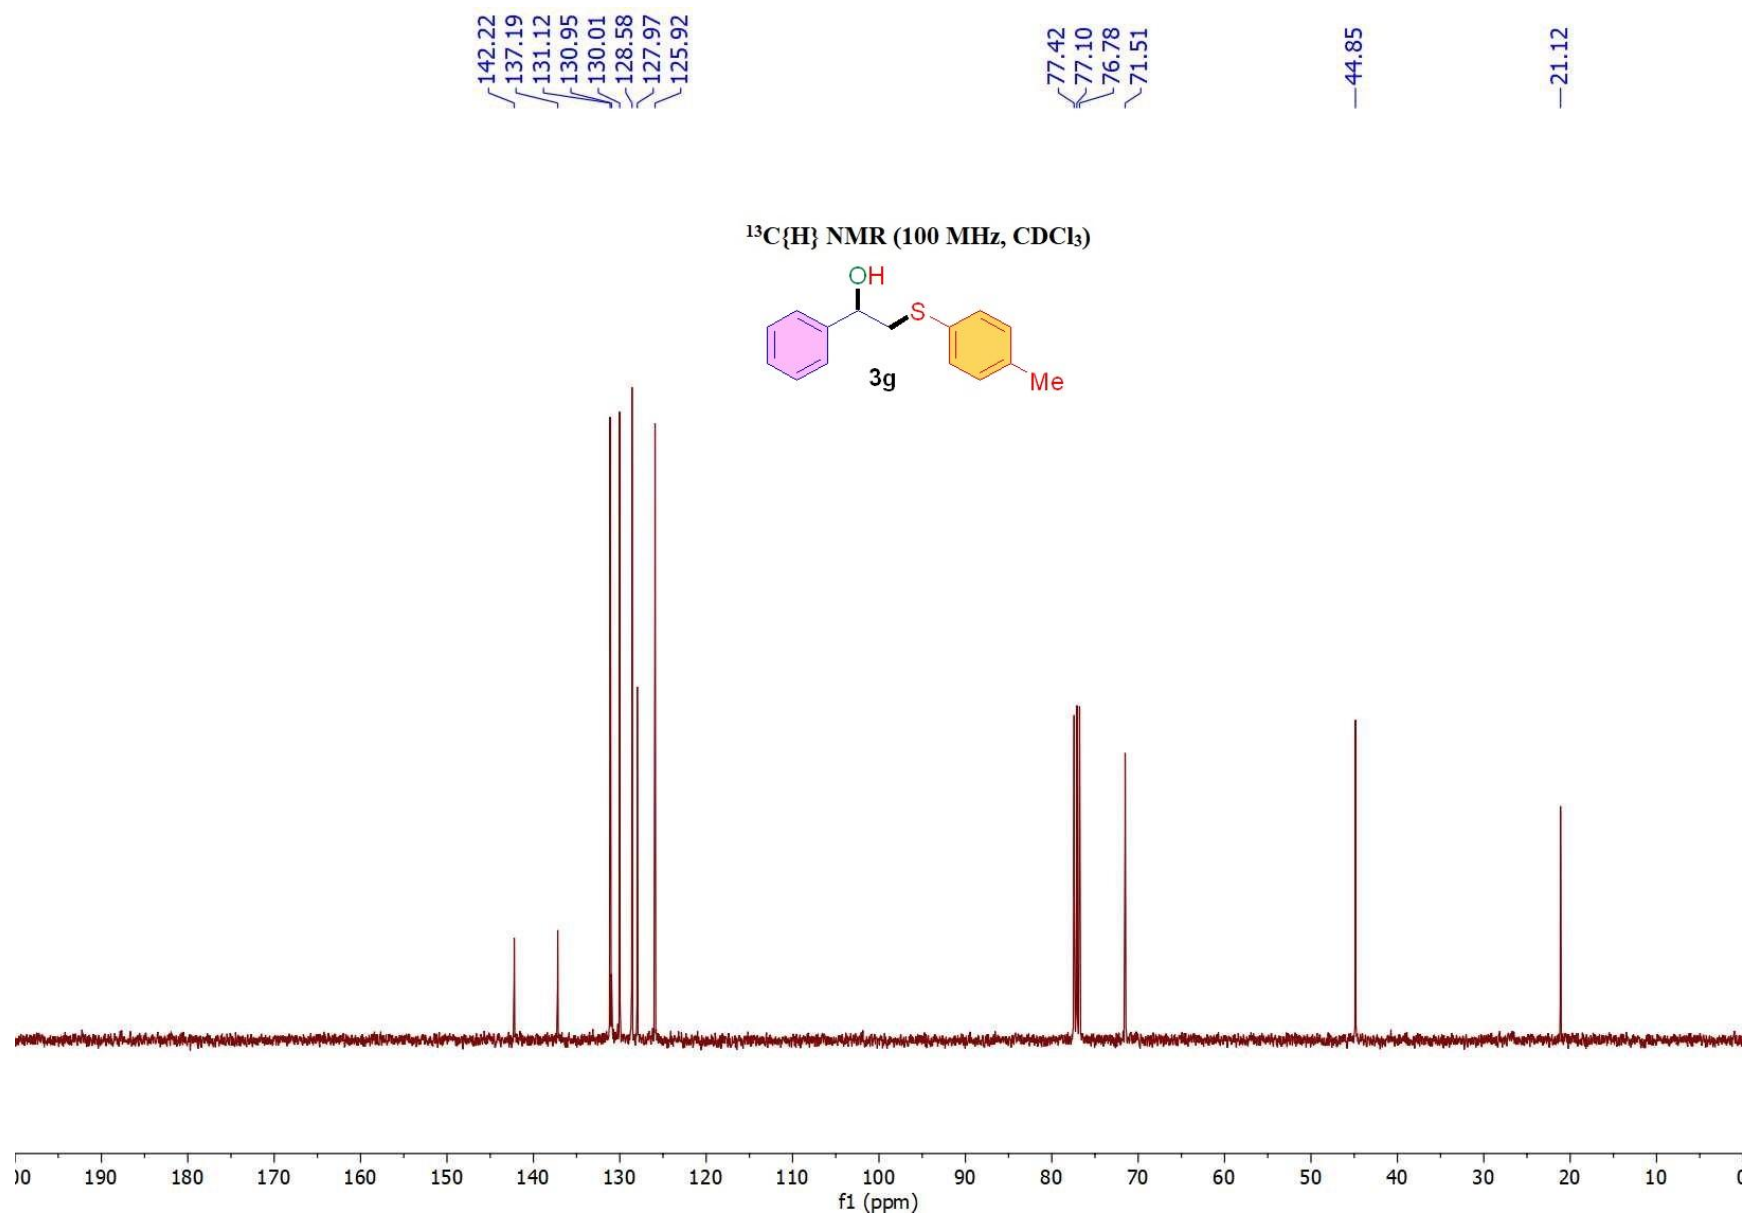

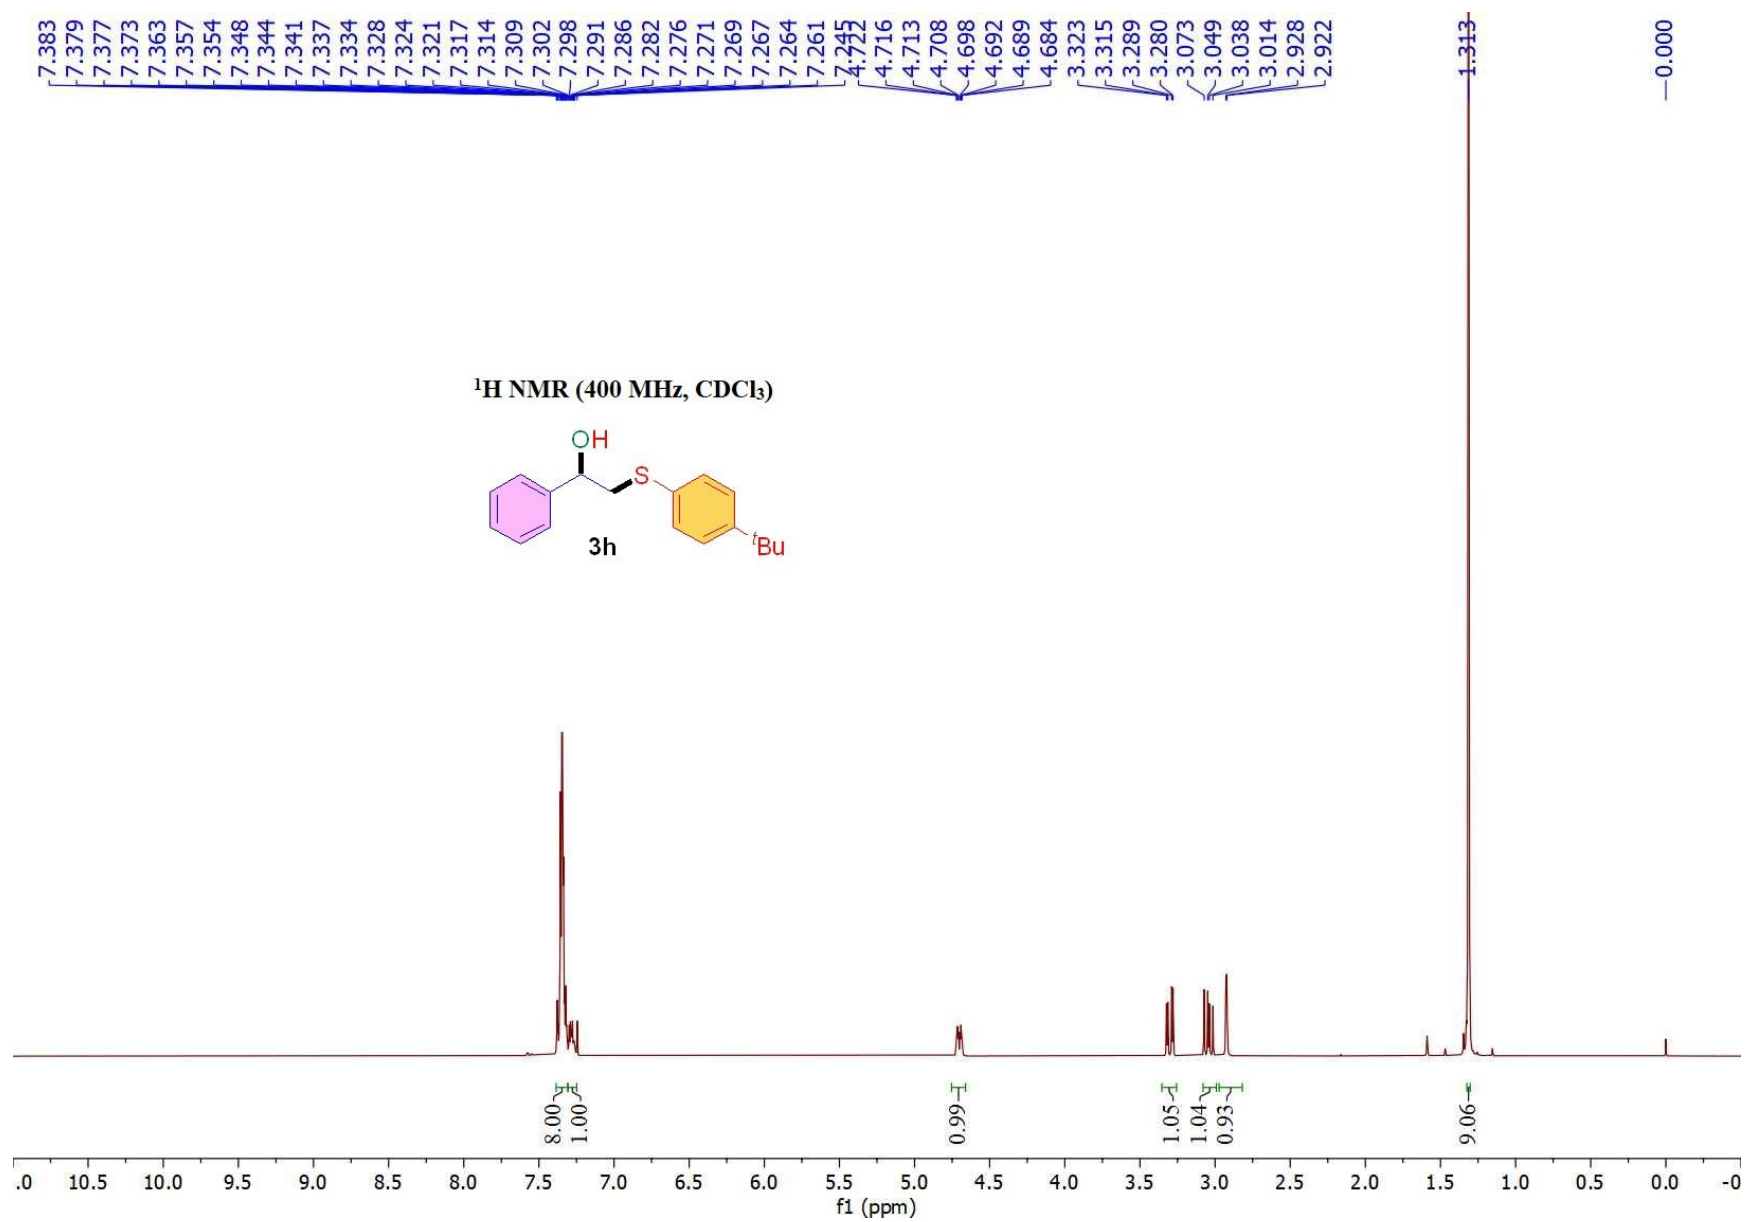

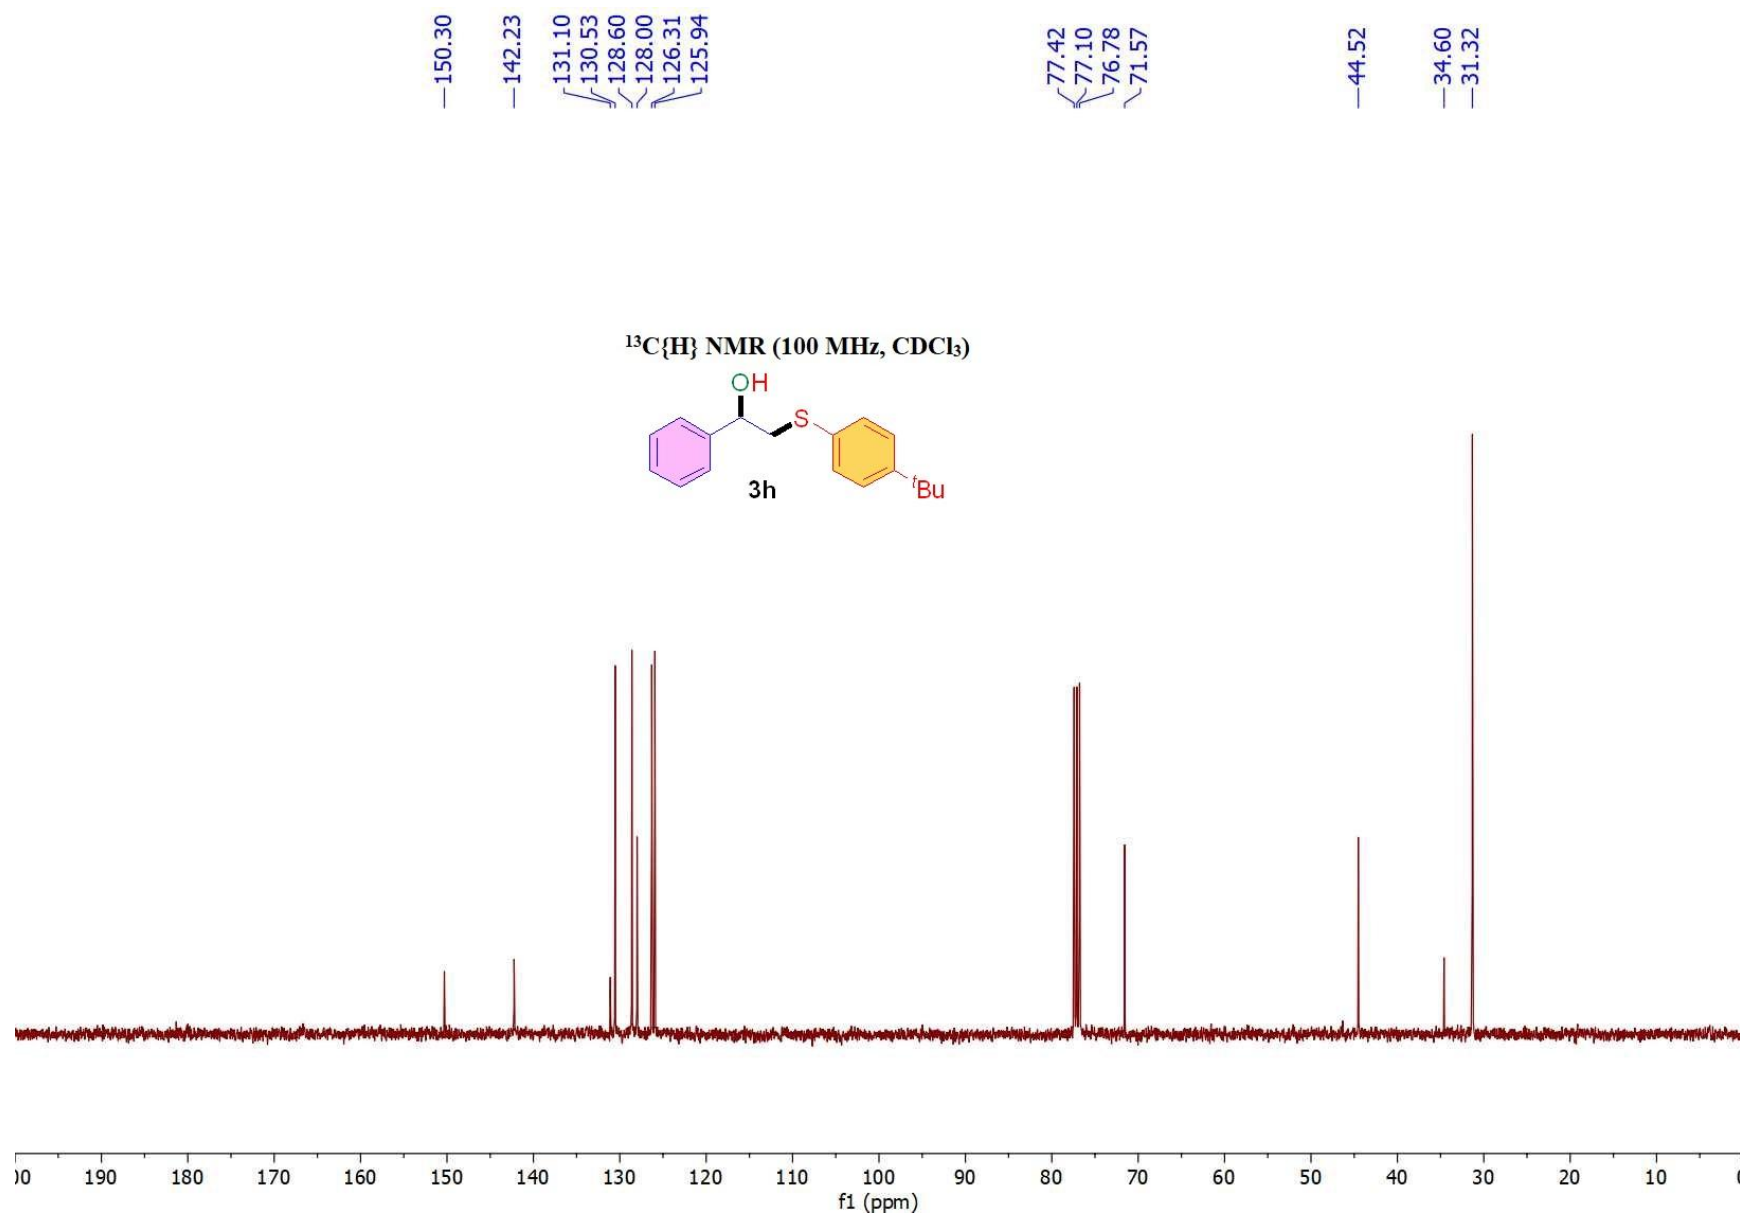

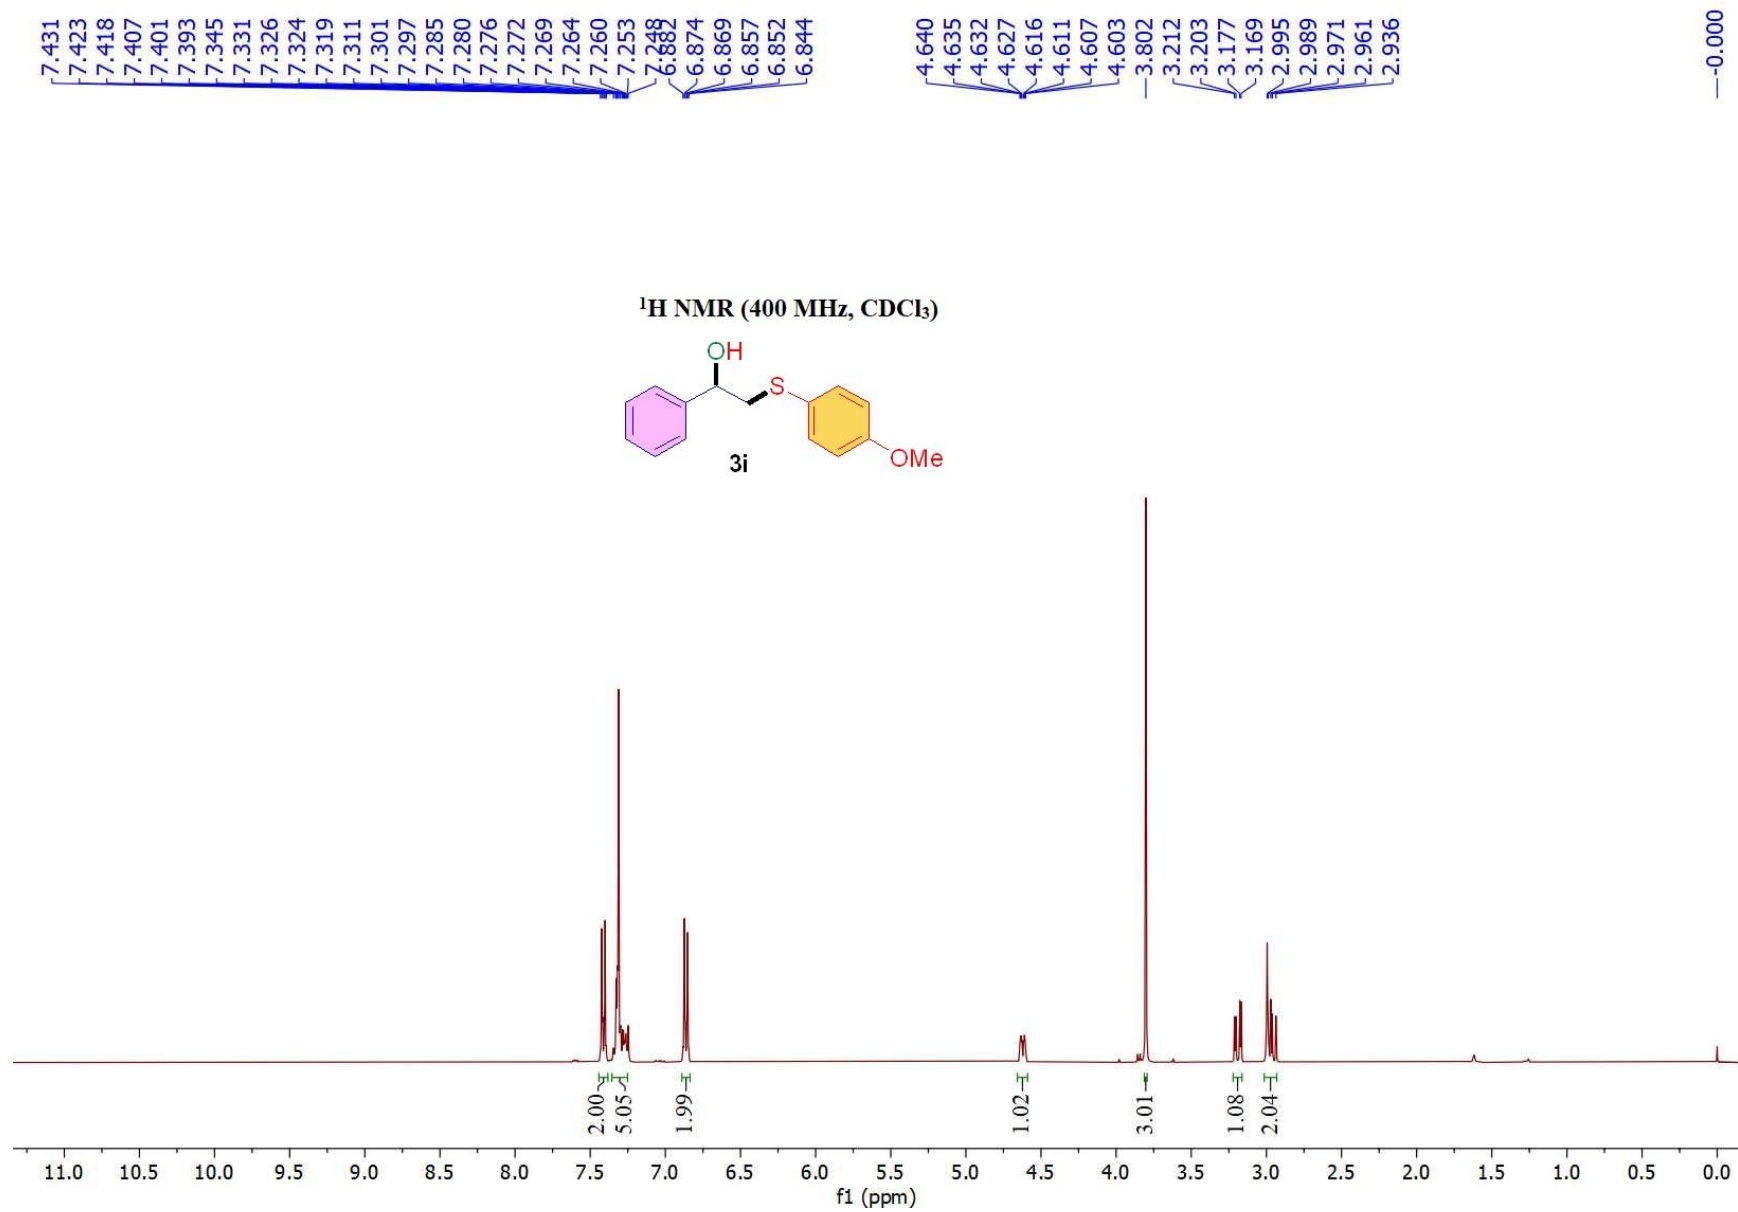

—159.49  
 —142.20  
 134.03  
 128.56  
 127.93  
 125.94  
 124.78  
 —114.88  
 77.42  
 77.10  
 76.78  
 71.38  
 —55.42  
 —46.16

$^{13}\text{C}\{\text{H}\}$  NMR (100 MHz,  $\text{CDCl}_3$ )

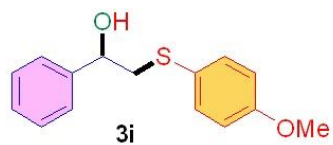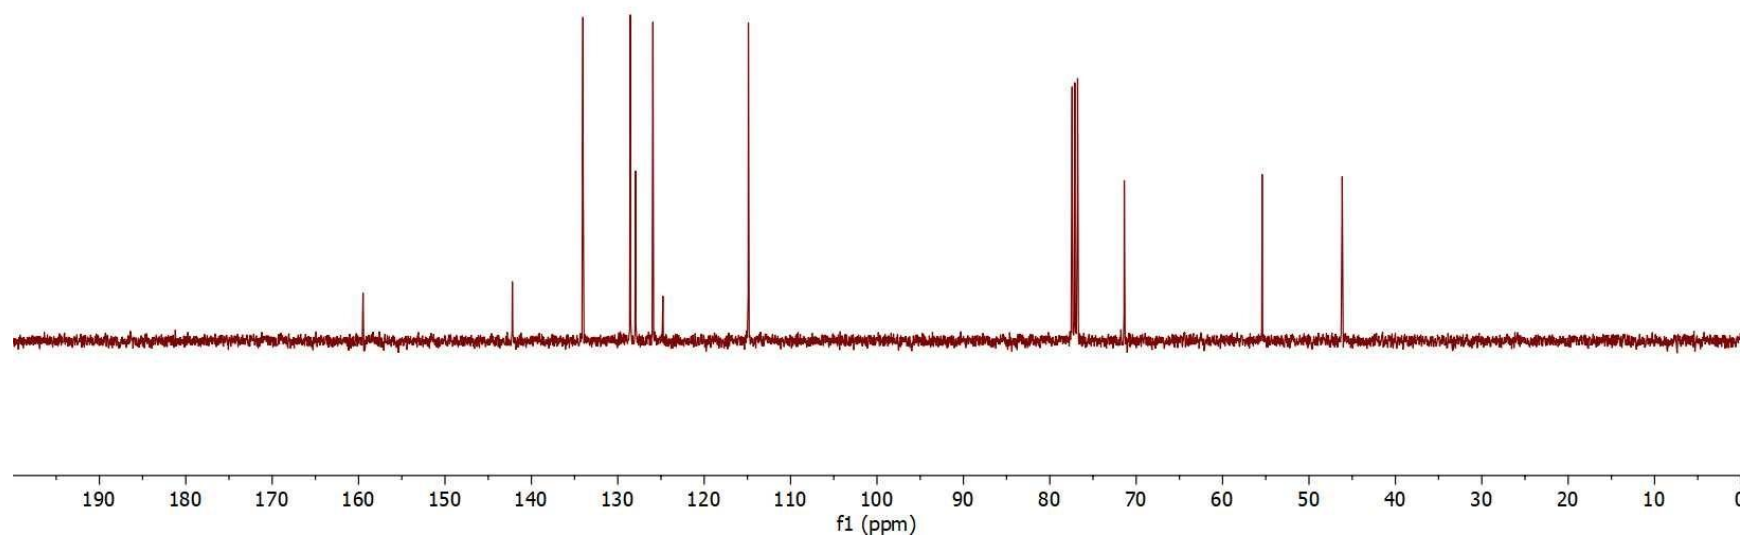

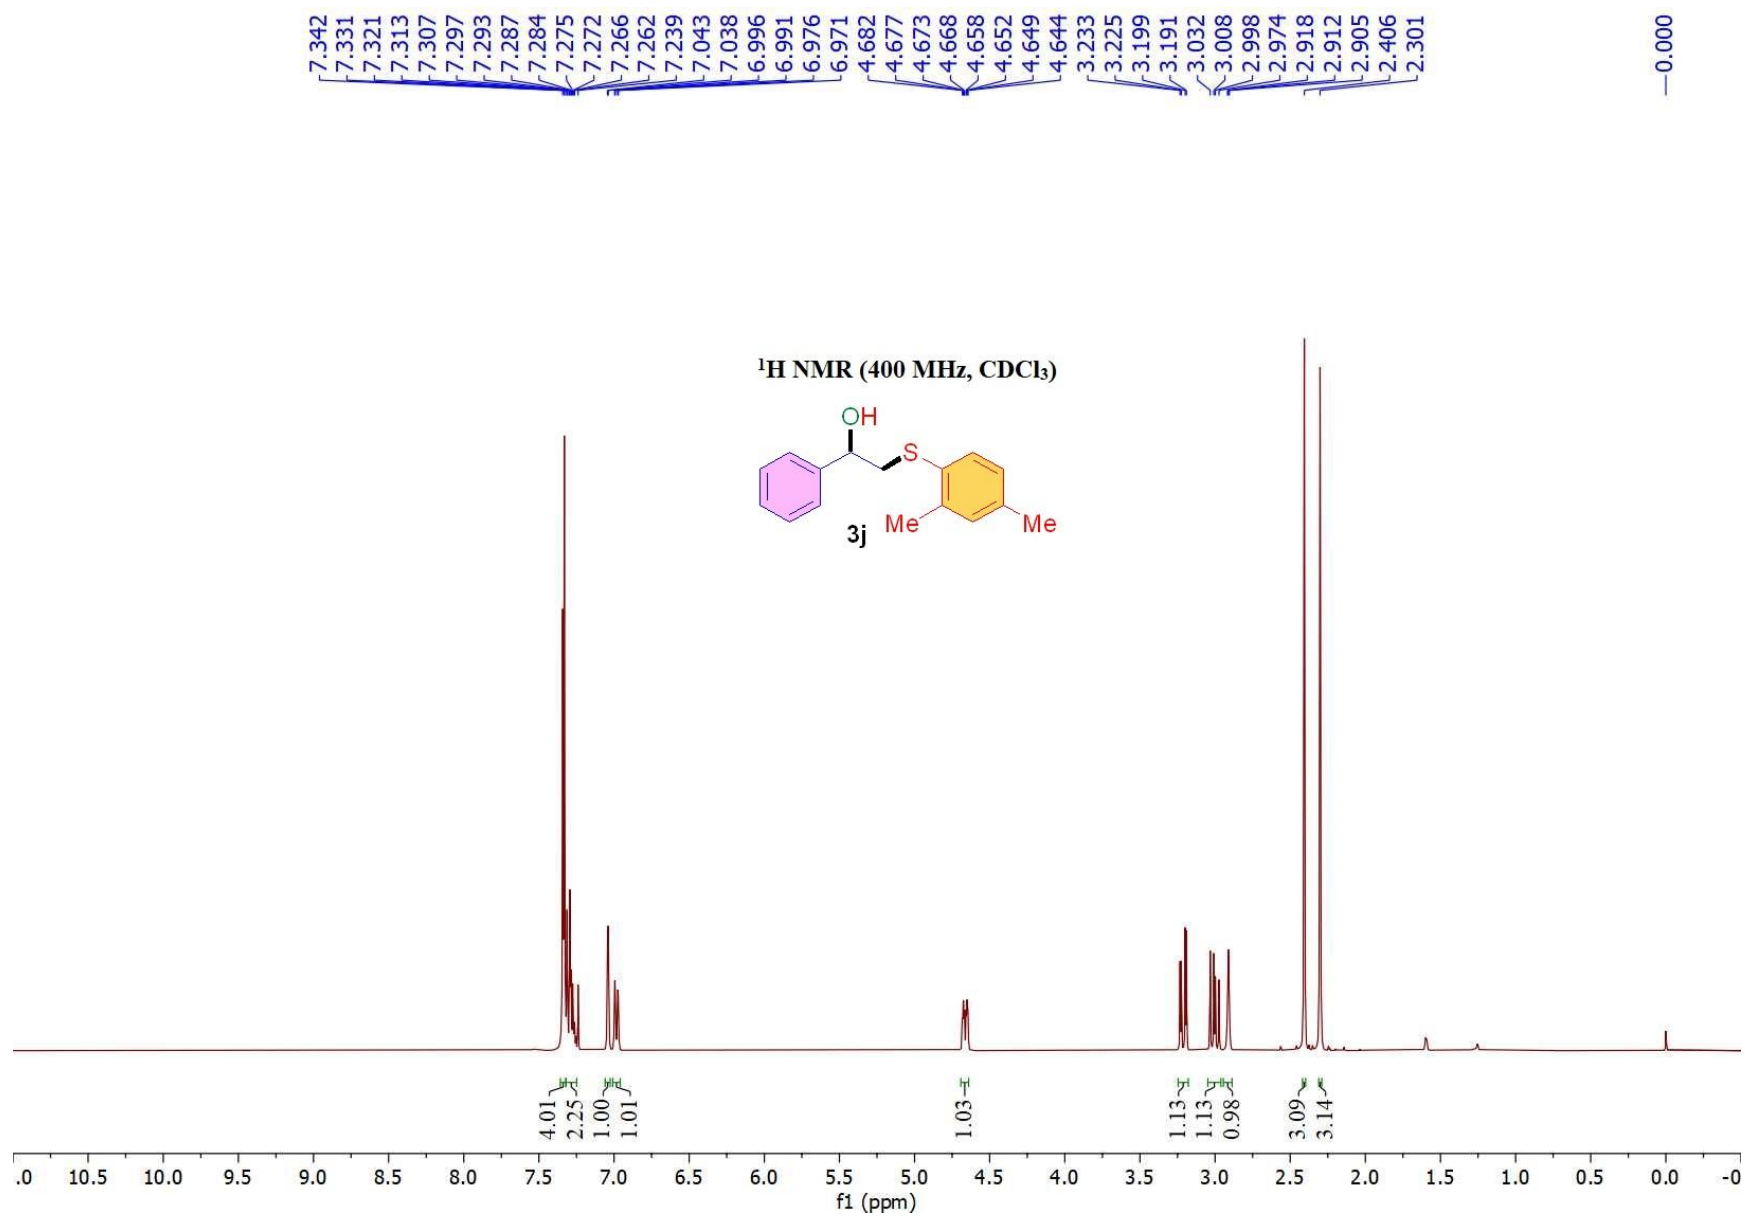

142.28  
139.11  
137.12  
131.51  
130.92  
130.14  
128.60  
127.99  
127.45  
125.92

77.42  
77.10  
76.78  
71.60

44.02

21.00  
20.67

$^{13}\text{C}\{^1\text{H}\}$  NMR (100 MHz,  $\text{CDCl}_3$ )

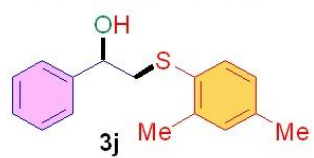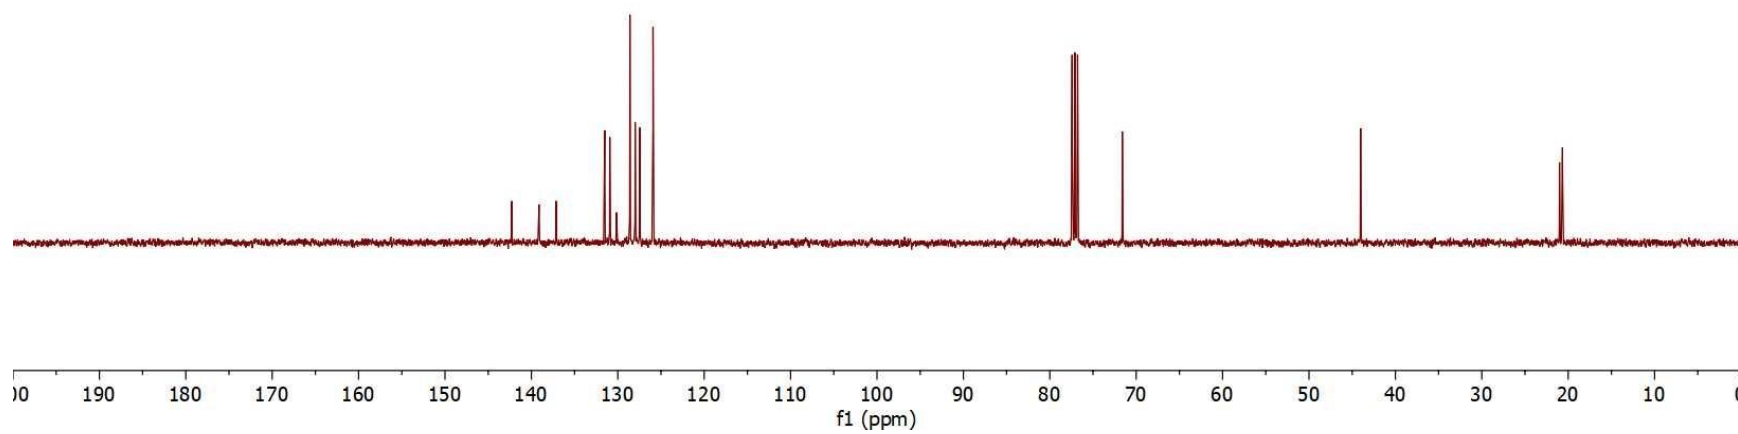

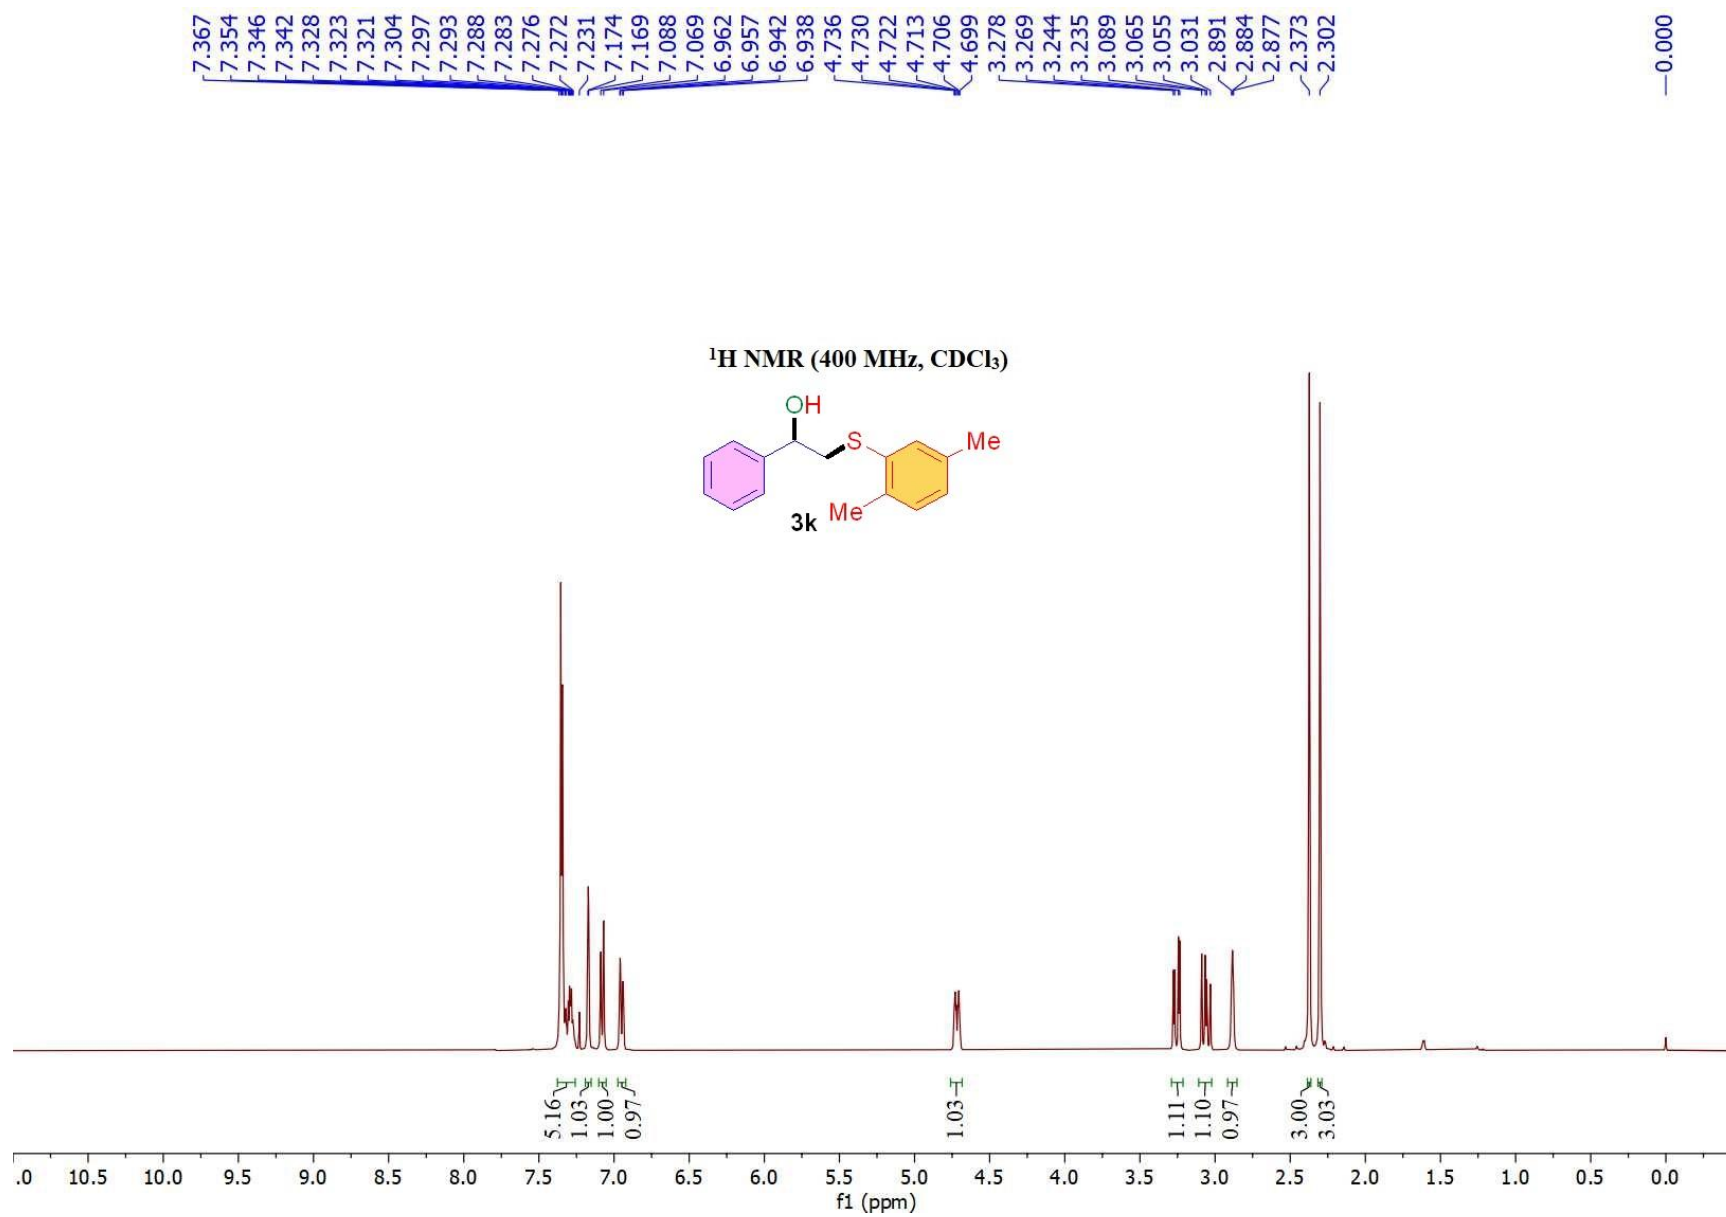

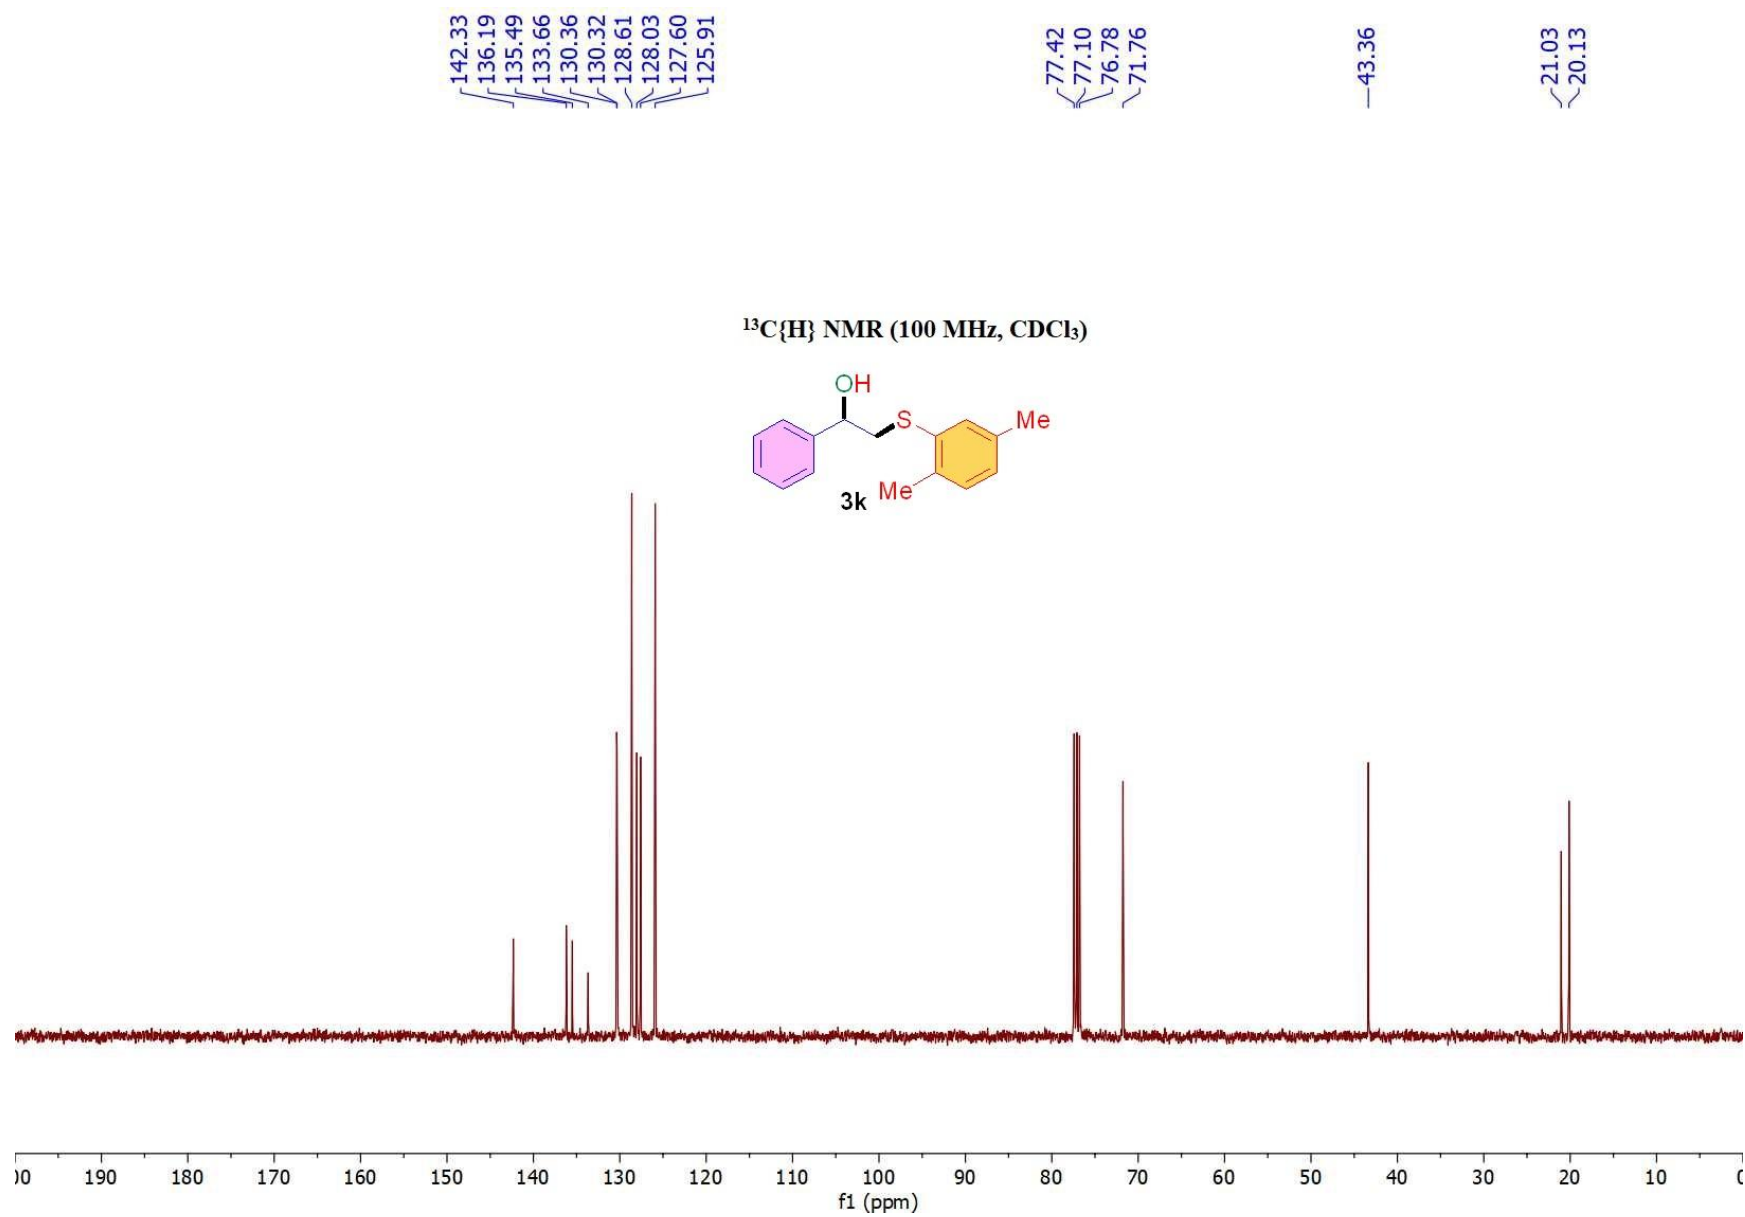

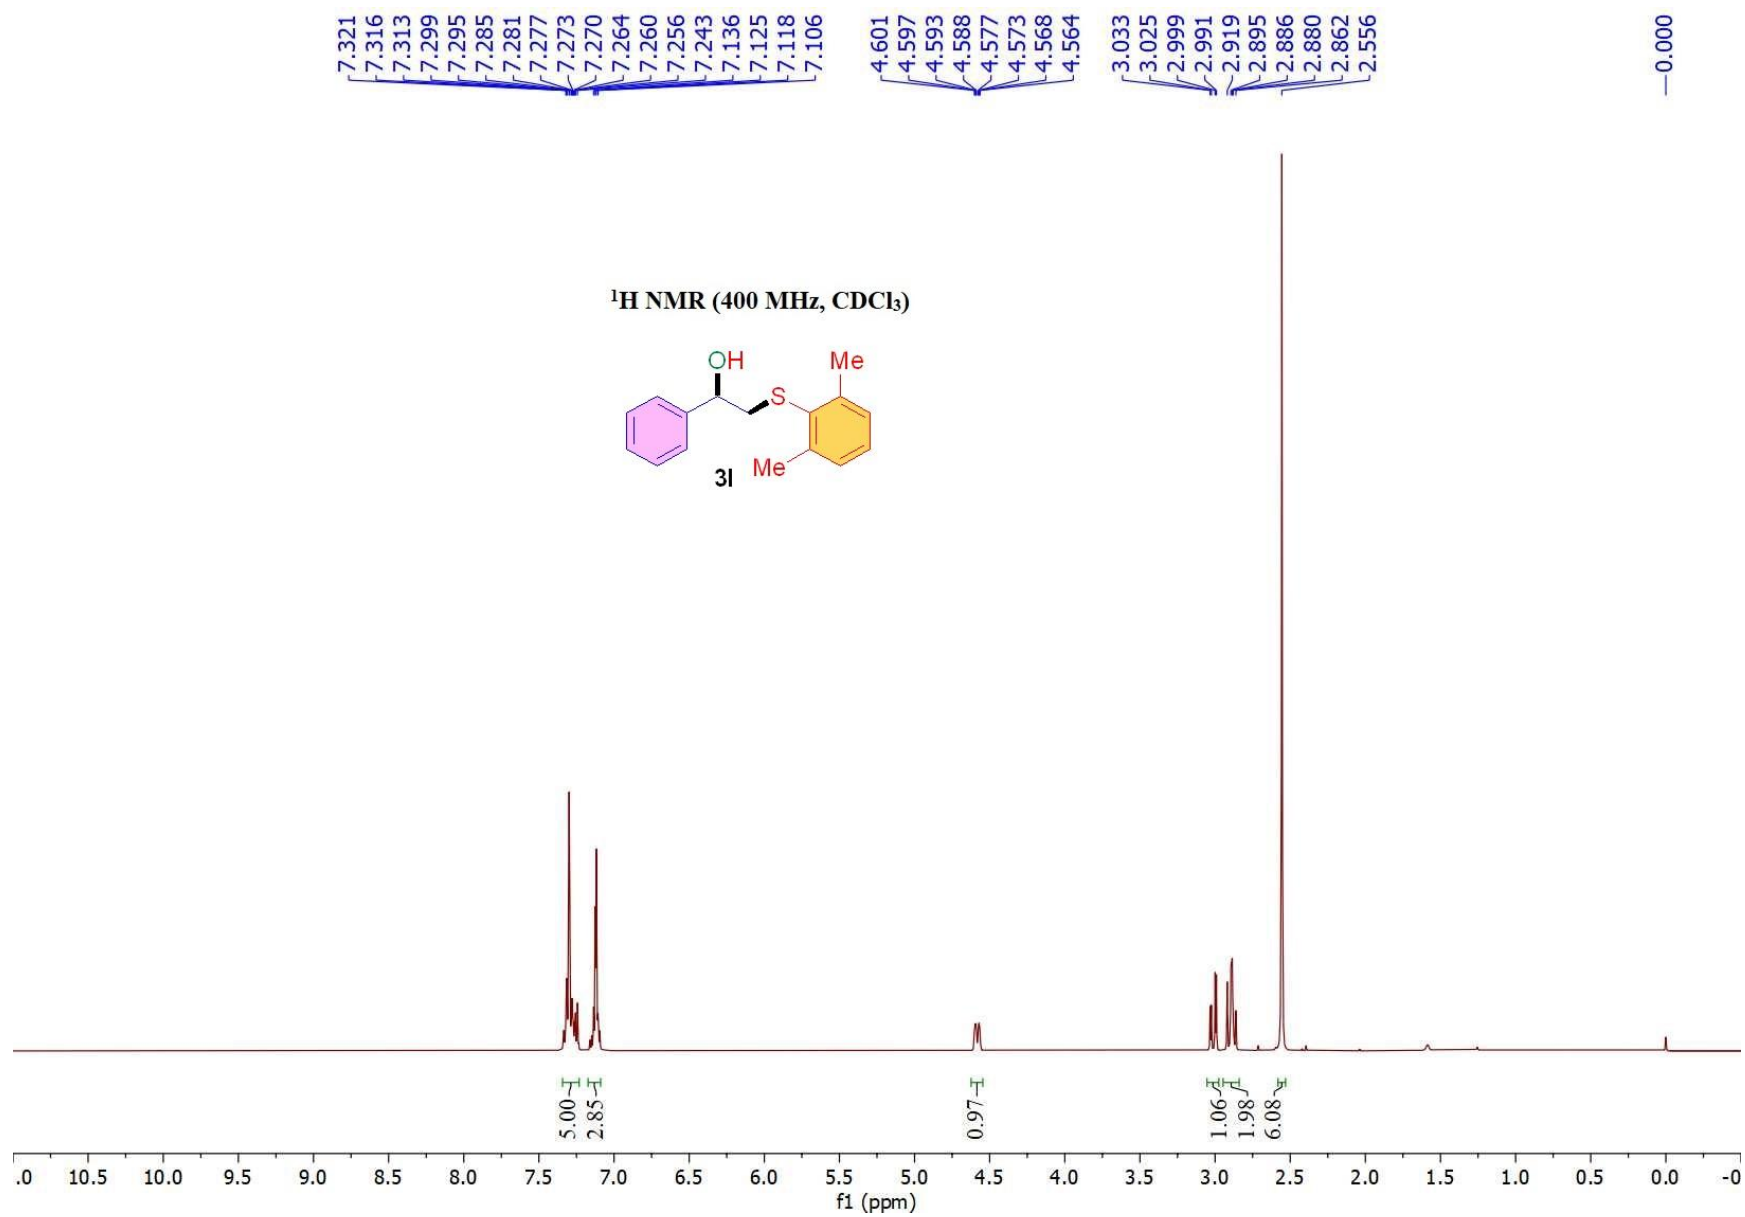

142.93  
142.29  
132.74  
128.56  
128.43  
127.96  
125.90

77.42  
77.10  
76.78  
72.57

—45.29

—22.22

$^{13}\text{C}\{\text{H}\}$  NMR (100 MHz,  $\text{CDCl}_3$ )

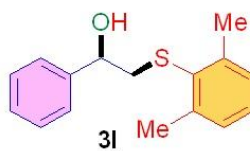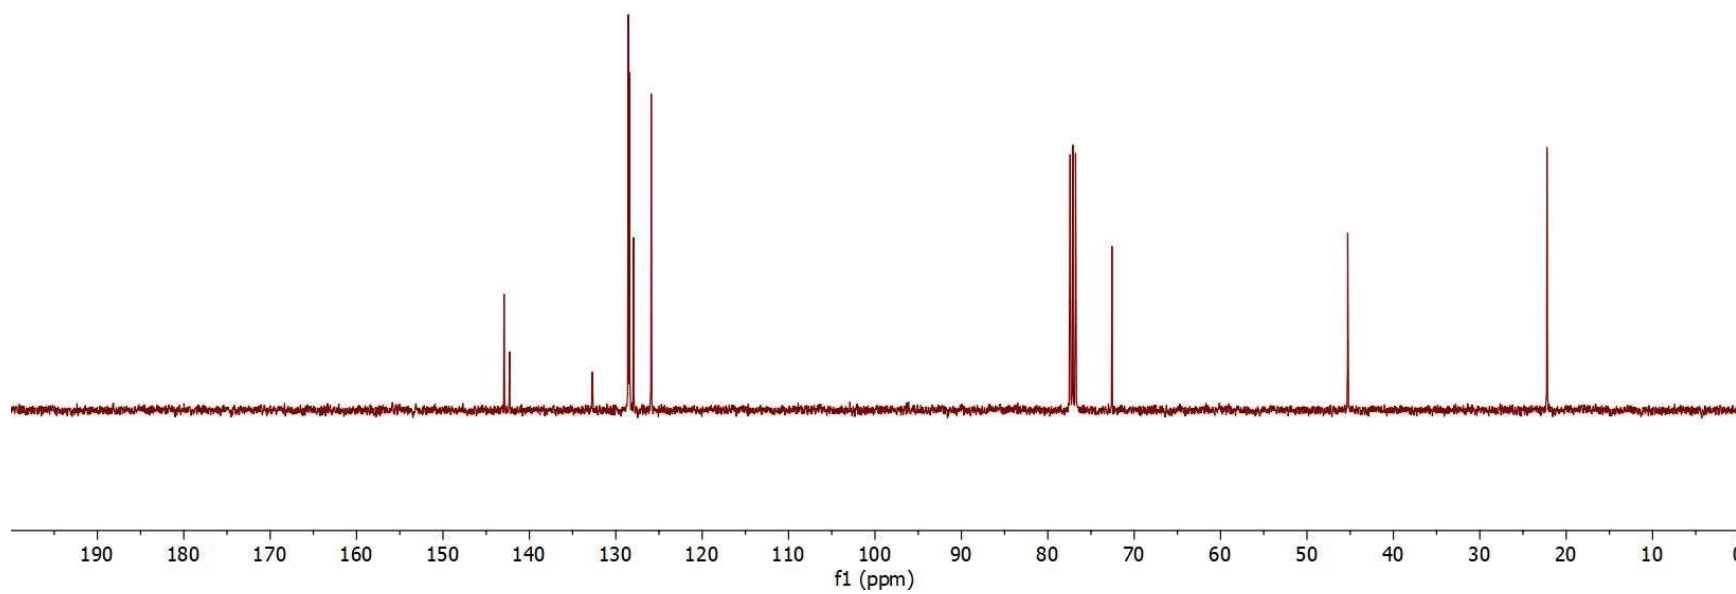

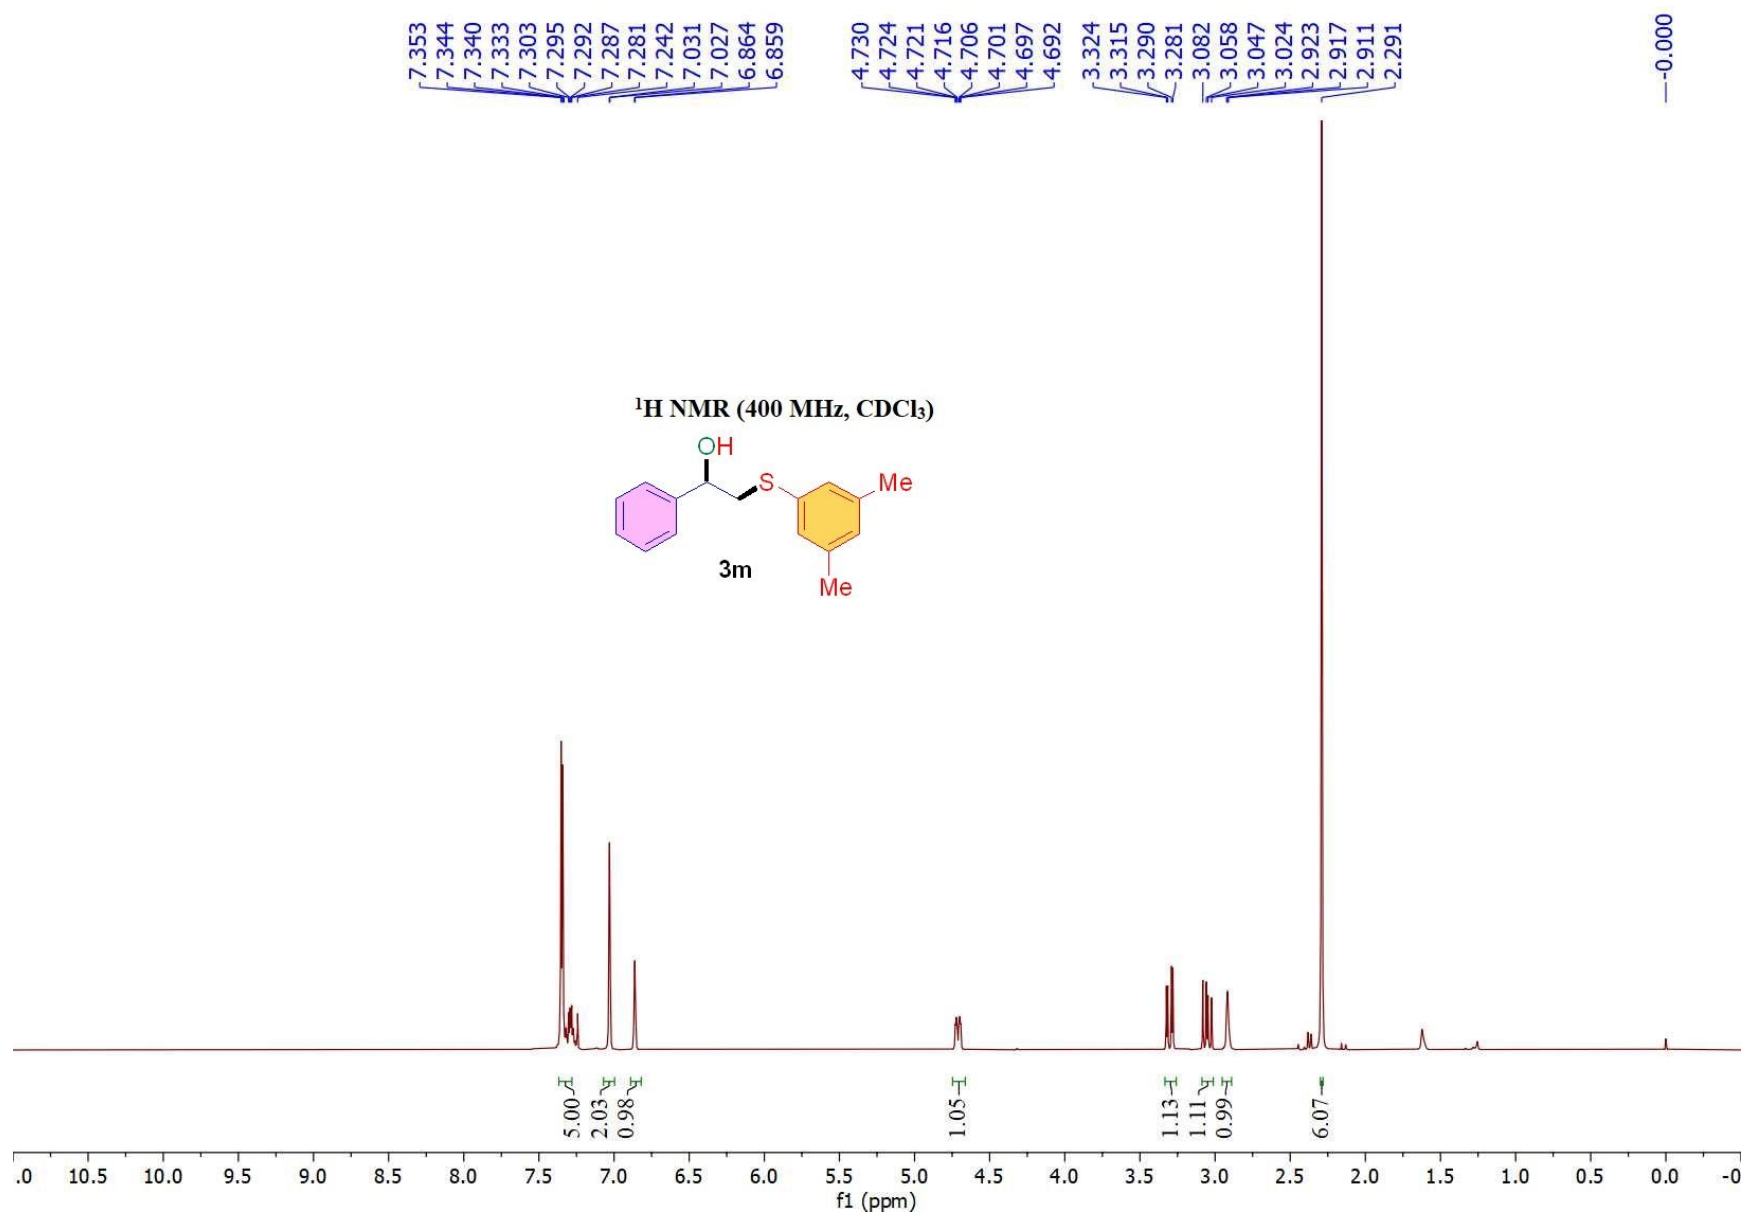

142.28  
138.85  
134.24  
128.80  
128.60  
128.02  
128.00  
125.93

77.42  
77.10  
76.78  
71.65

44.14

21.29

$^{13}\text{C}\{\text{H}\}$  NMR (100 MHz,  $\text{CDCl}_3$ )

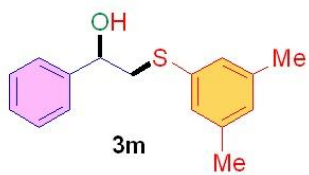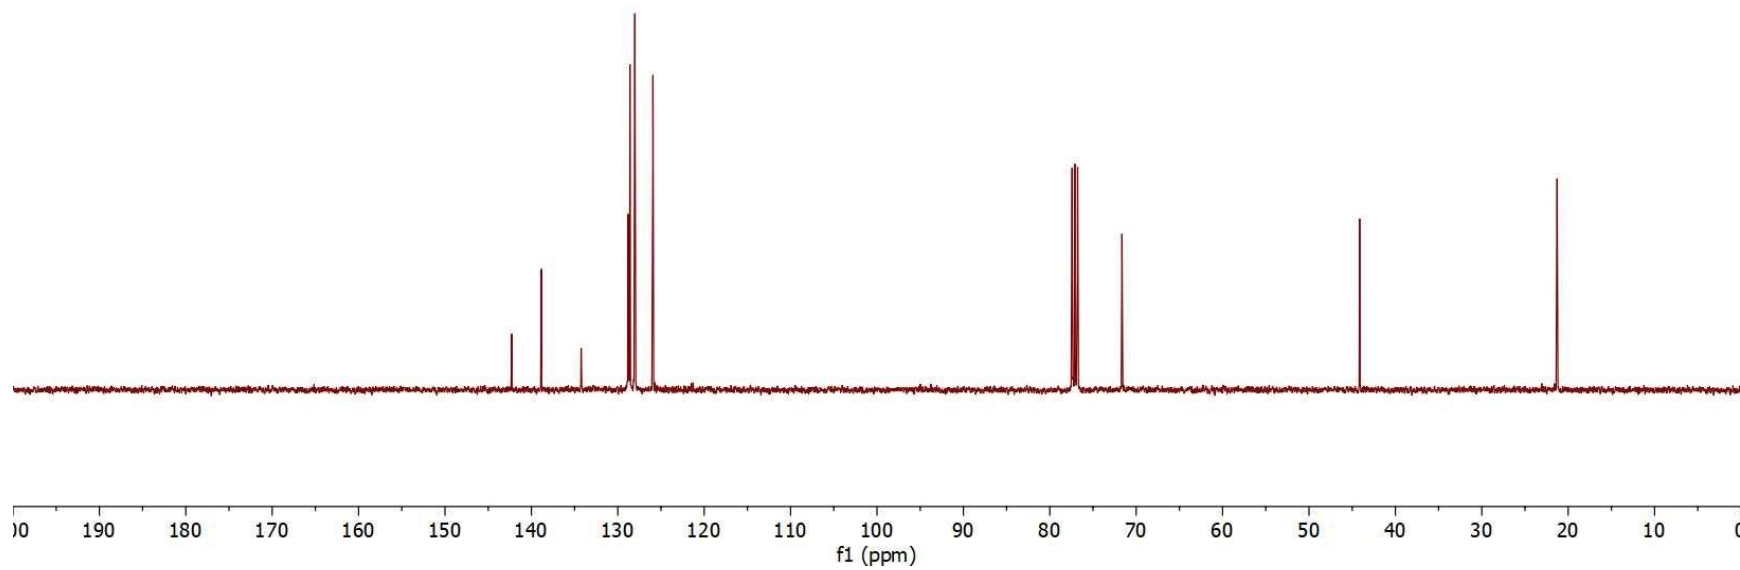

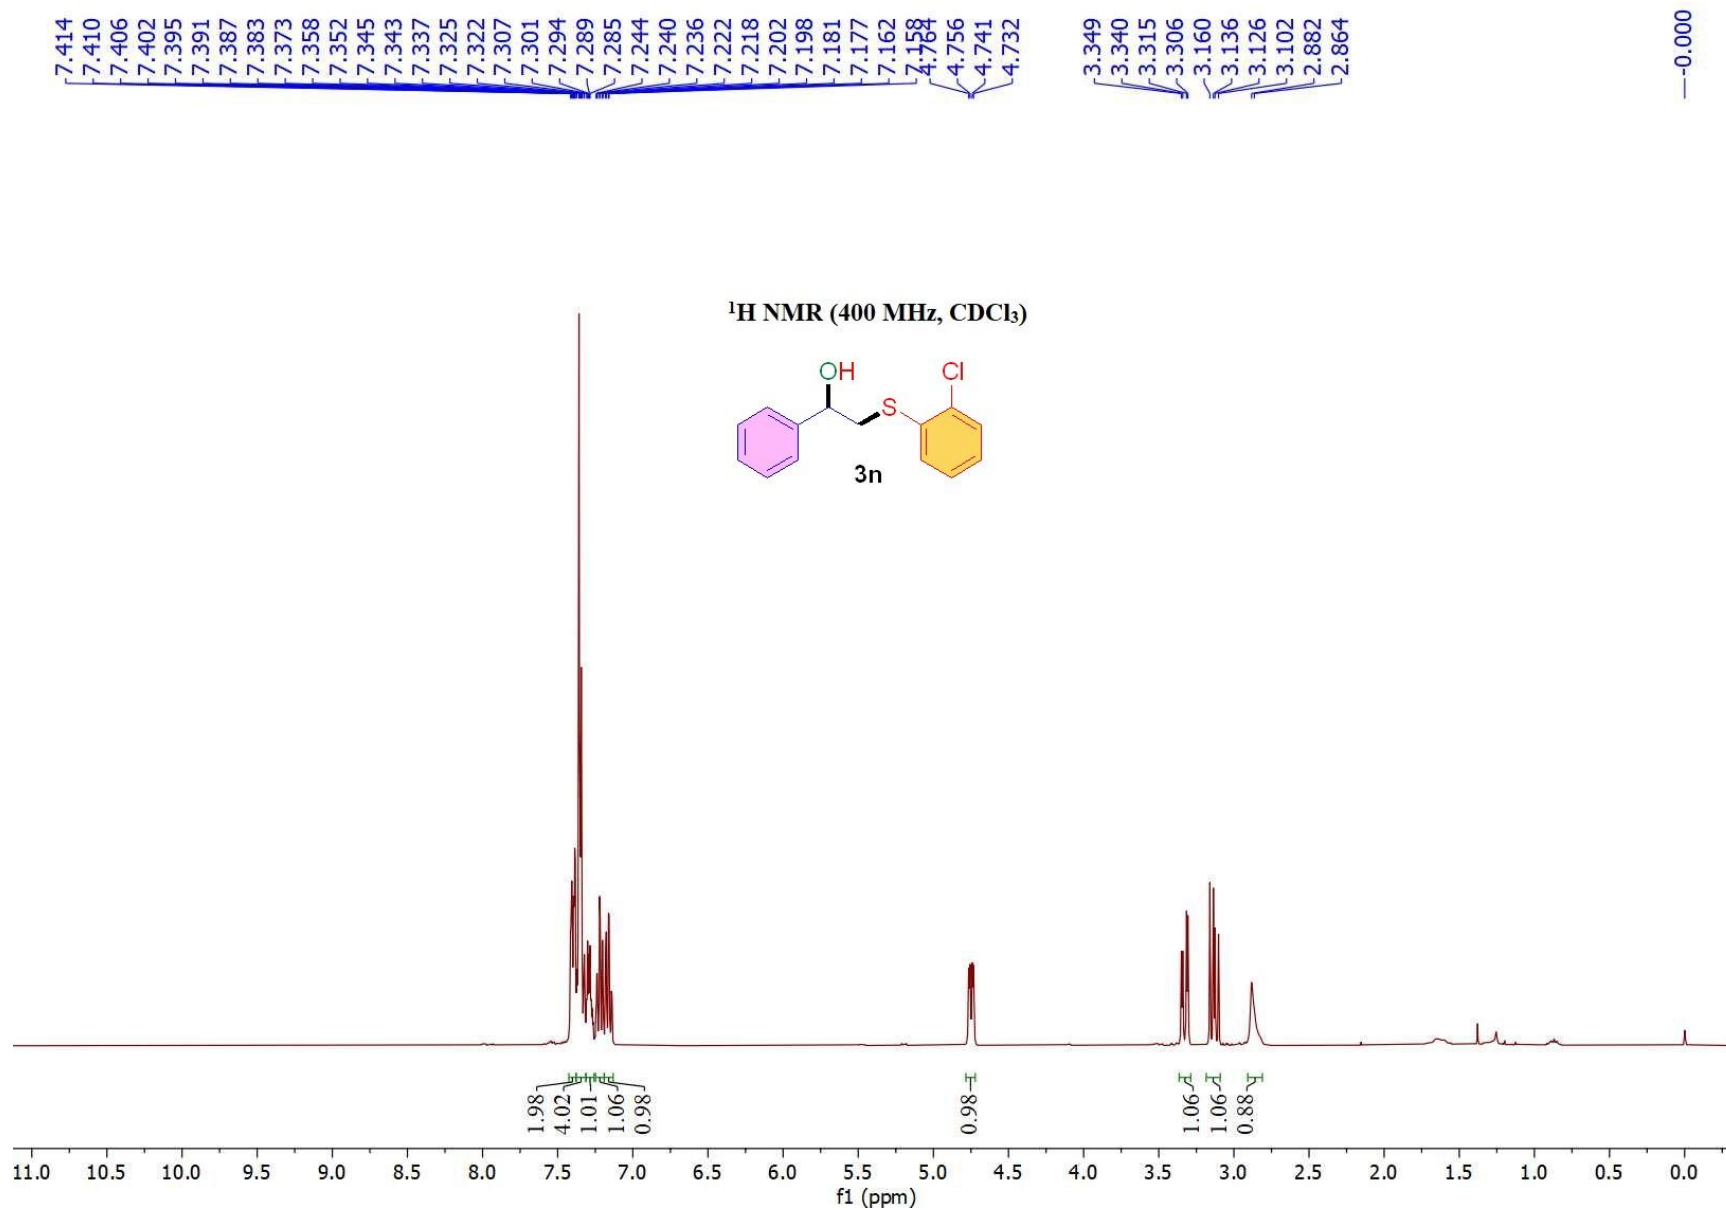

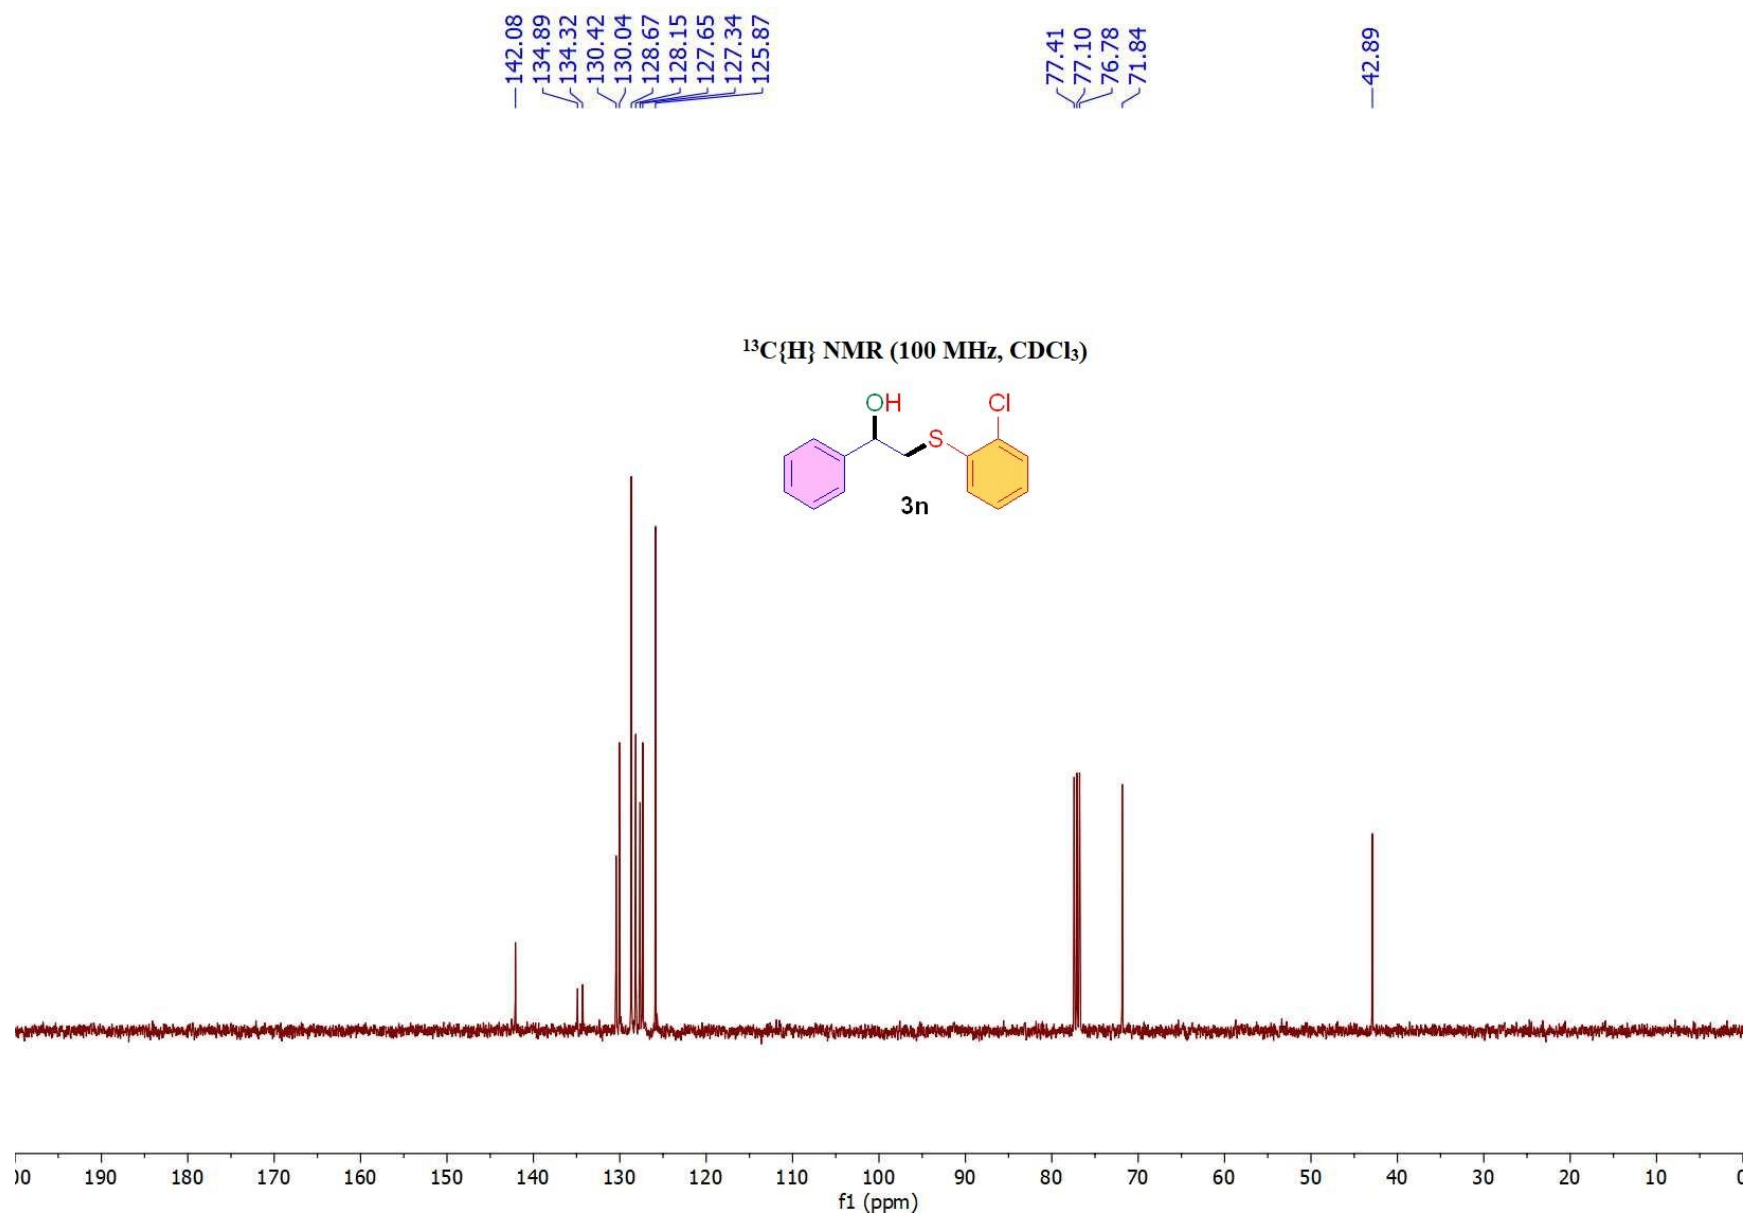

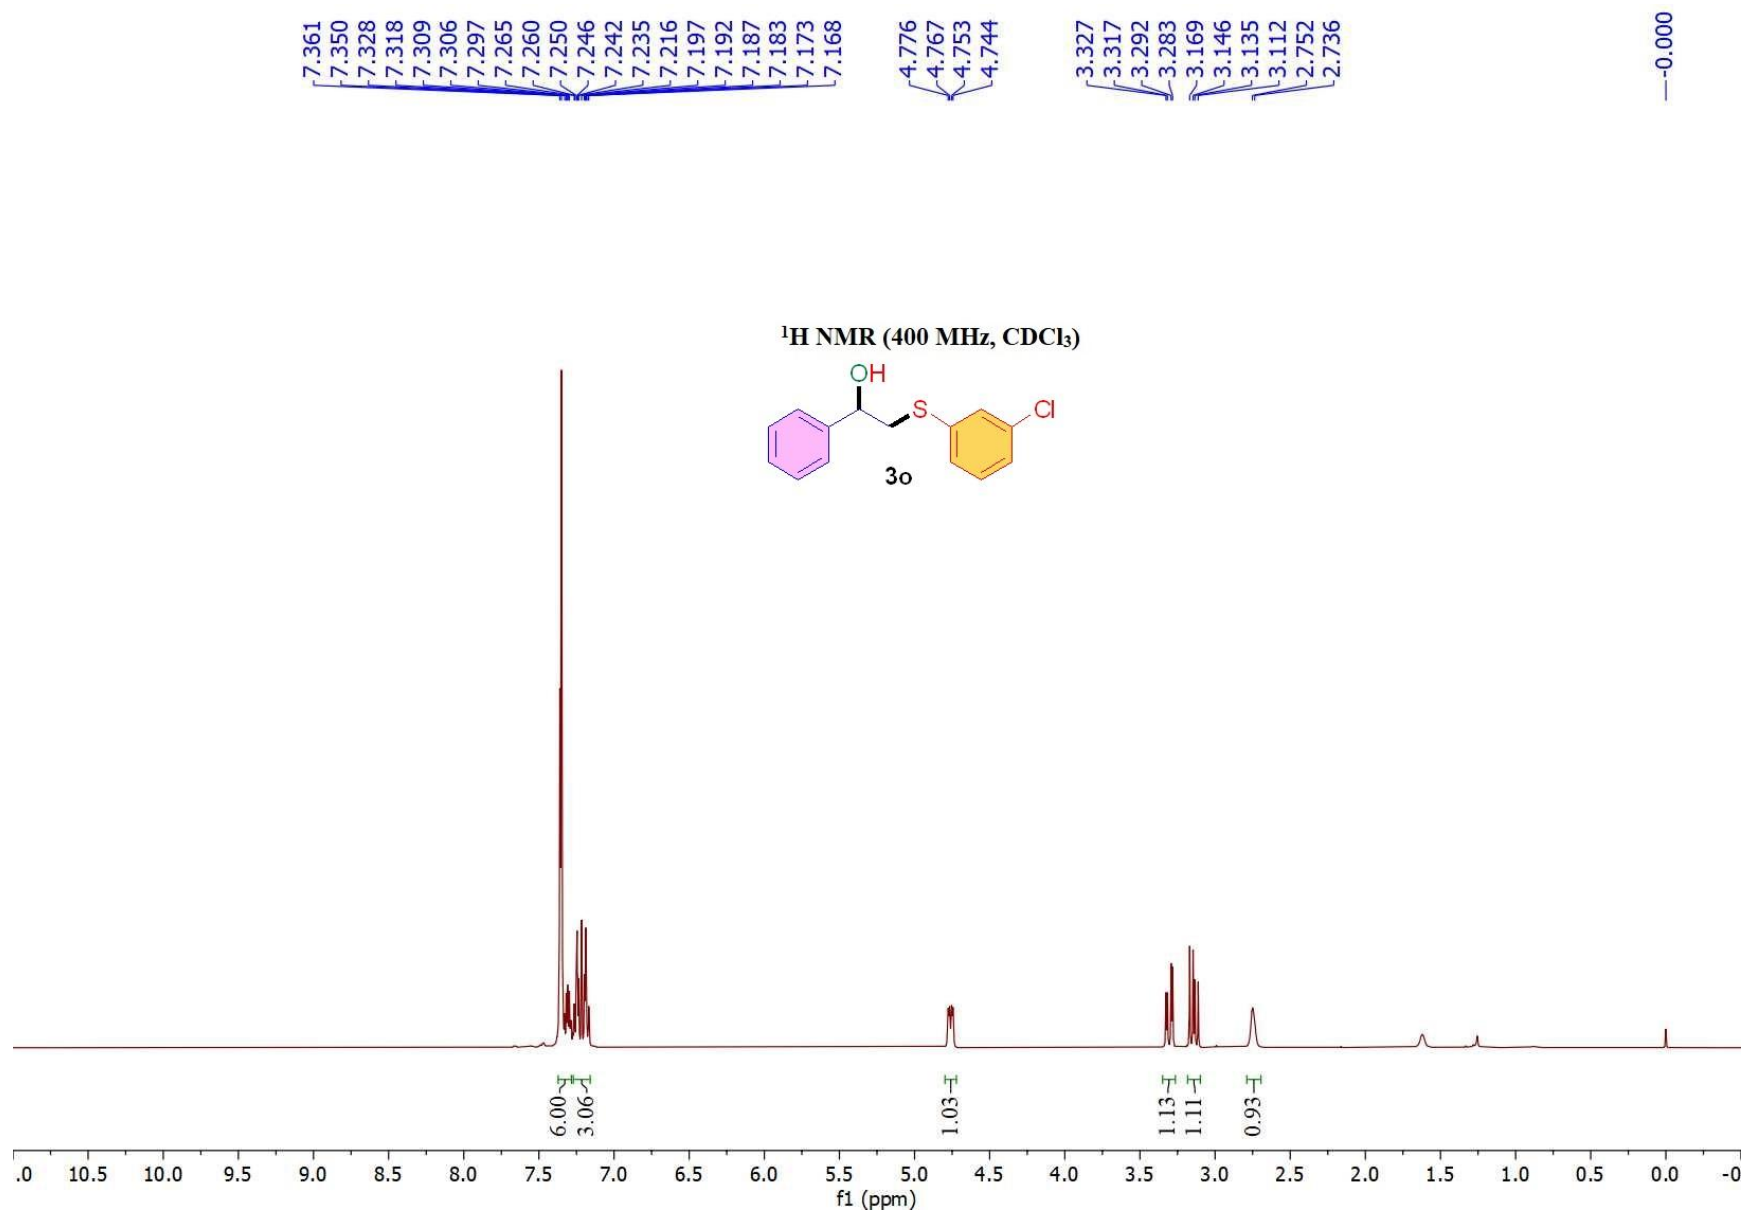

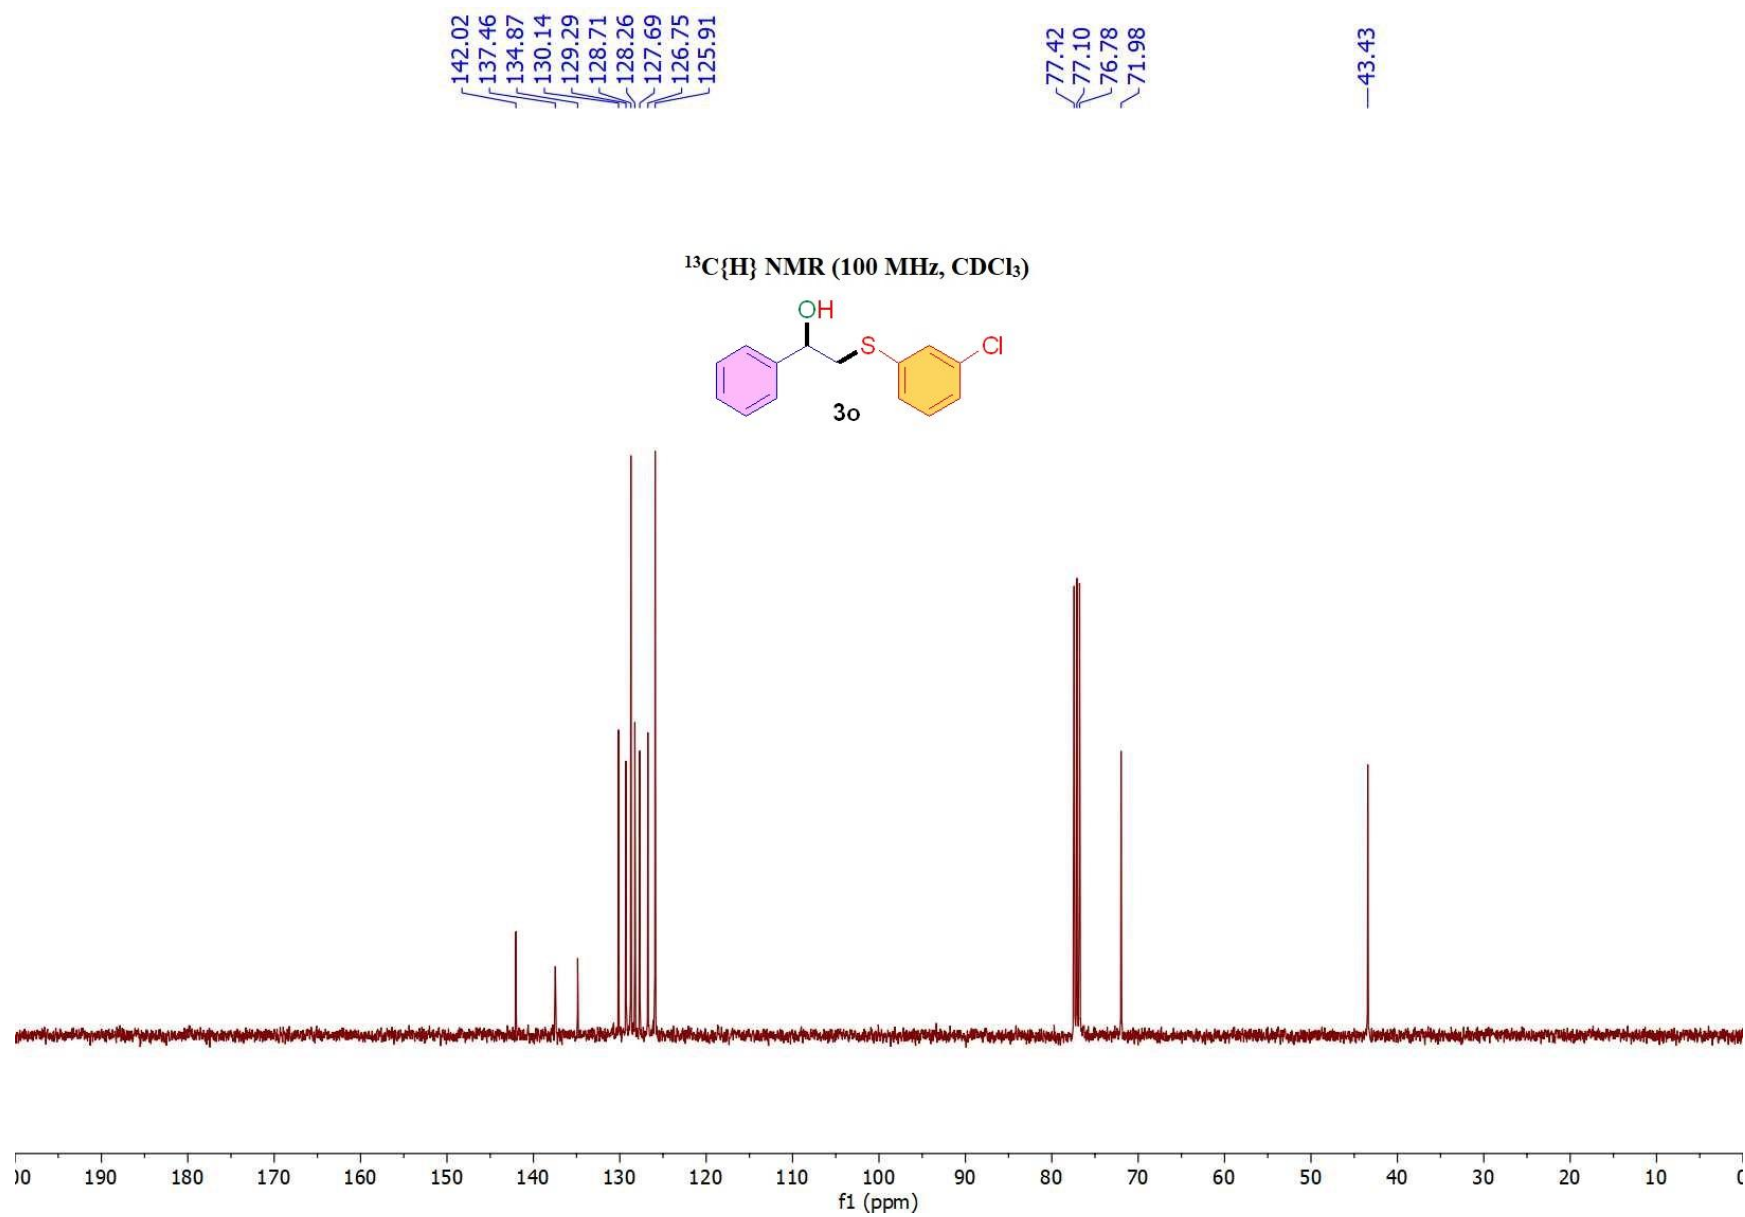

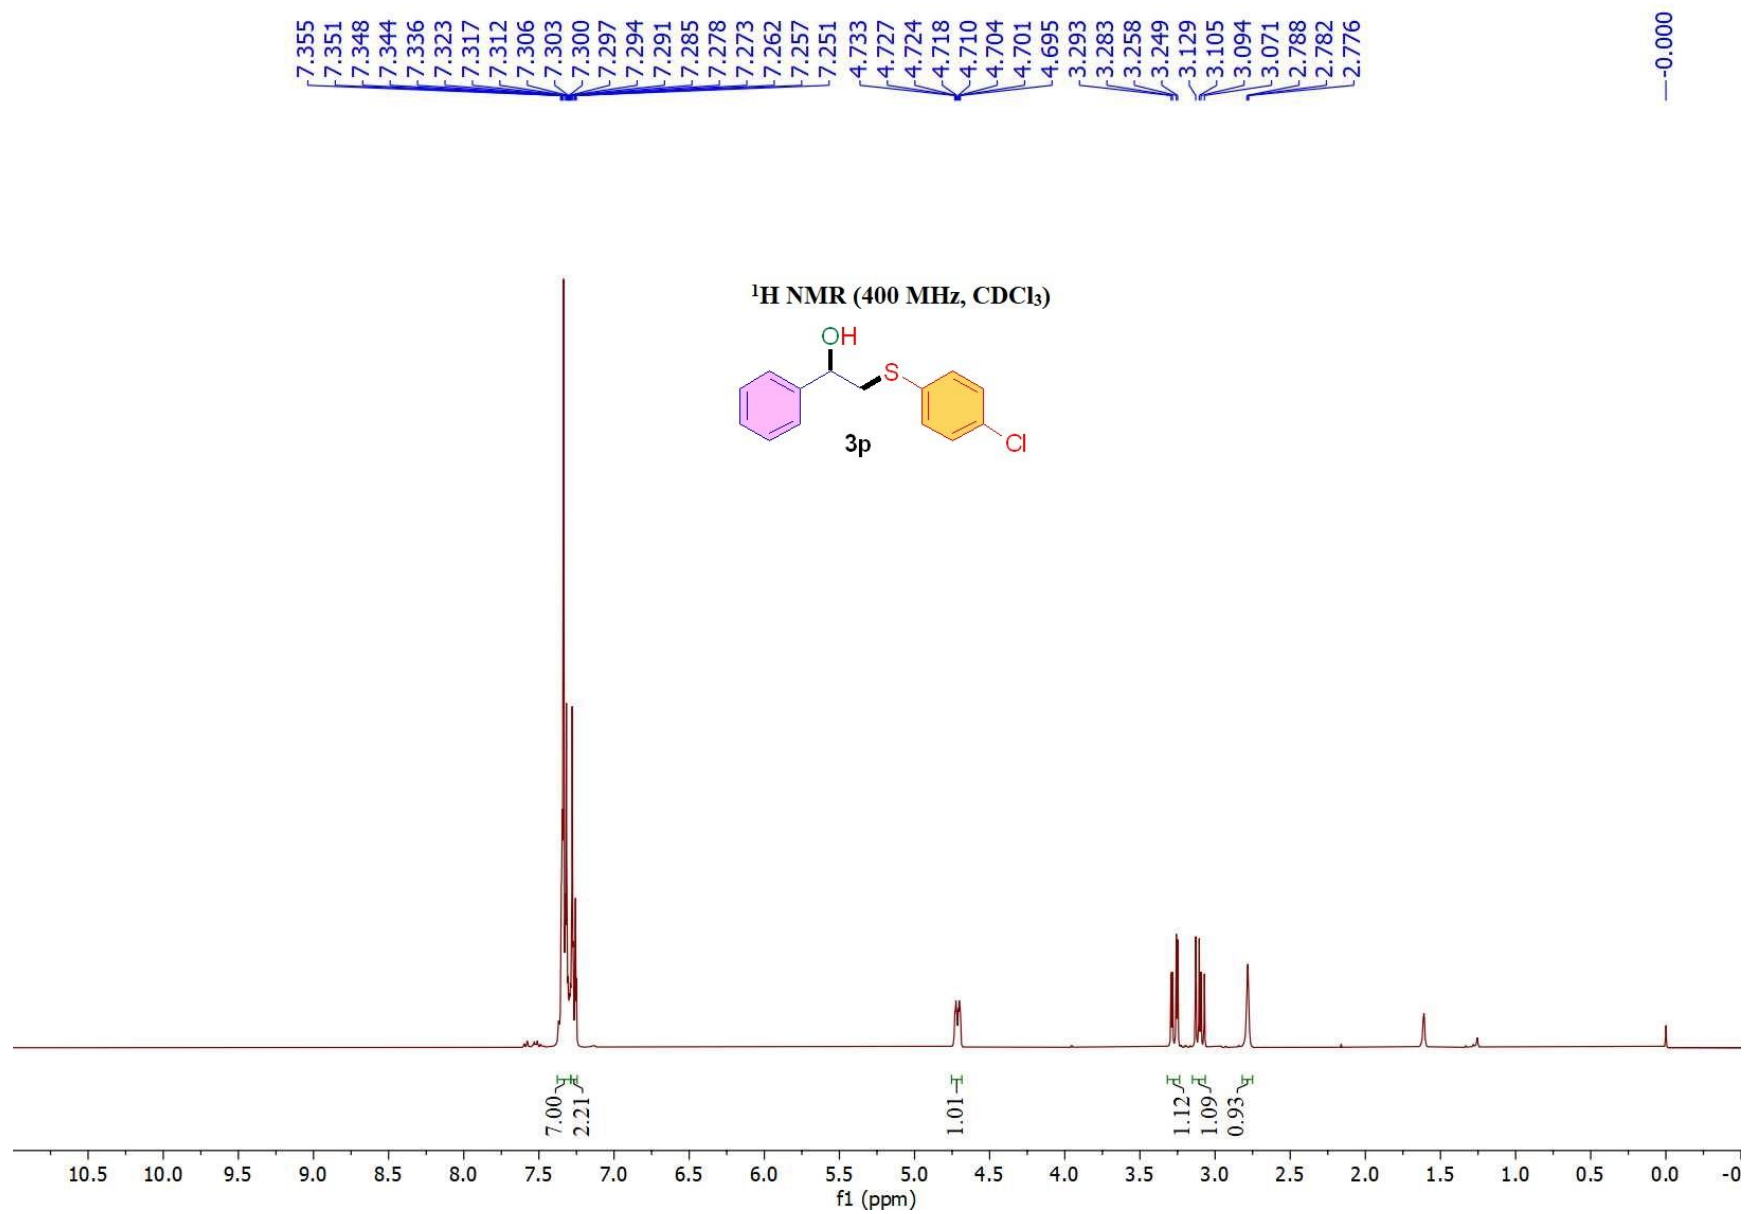

142.04  
133.65  
132.87  
131.56  
129.32  
128.69  
128.19  
125.91

77.42  
77.10  
76.78  
71.86

44.14

$^{13}\text{C}\{\text{H}\}$  NMR (100 MHz,  $\text{CDCl}_3$ )

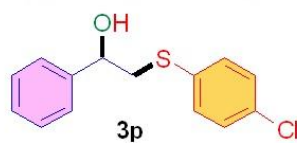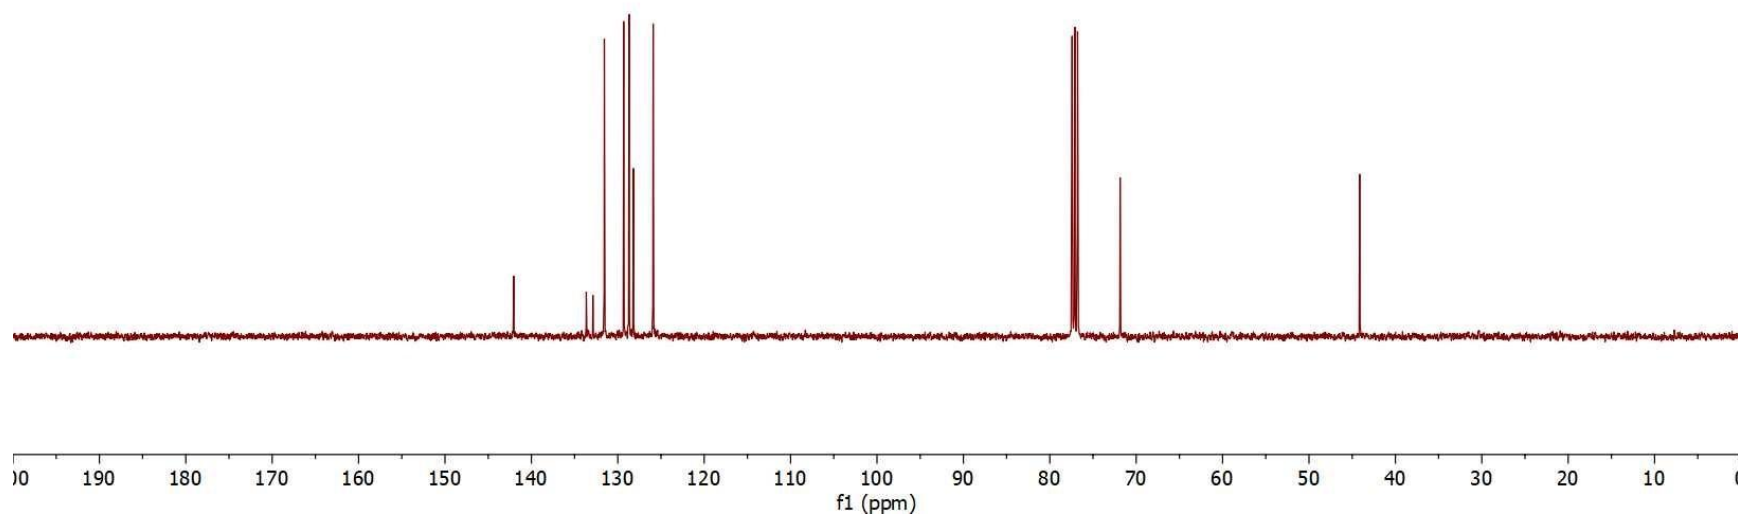

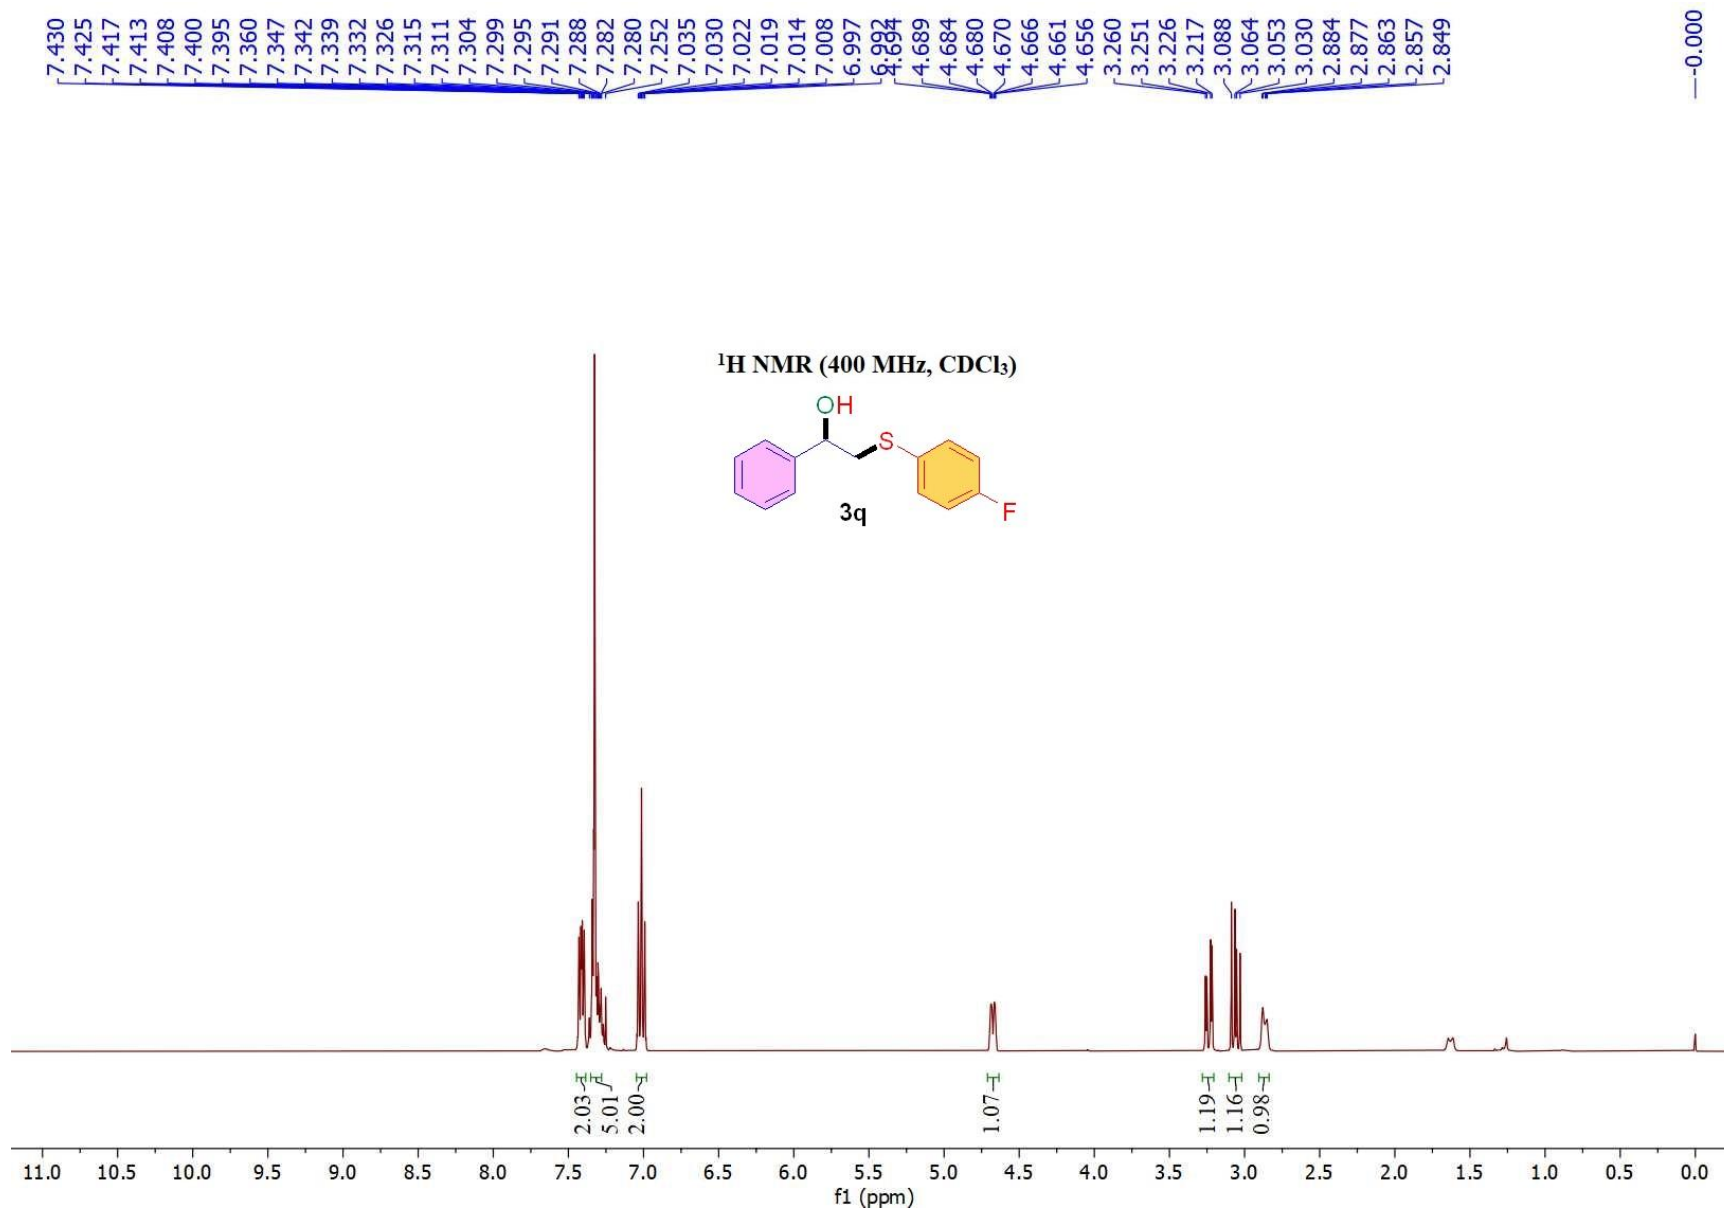

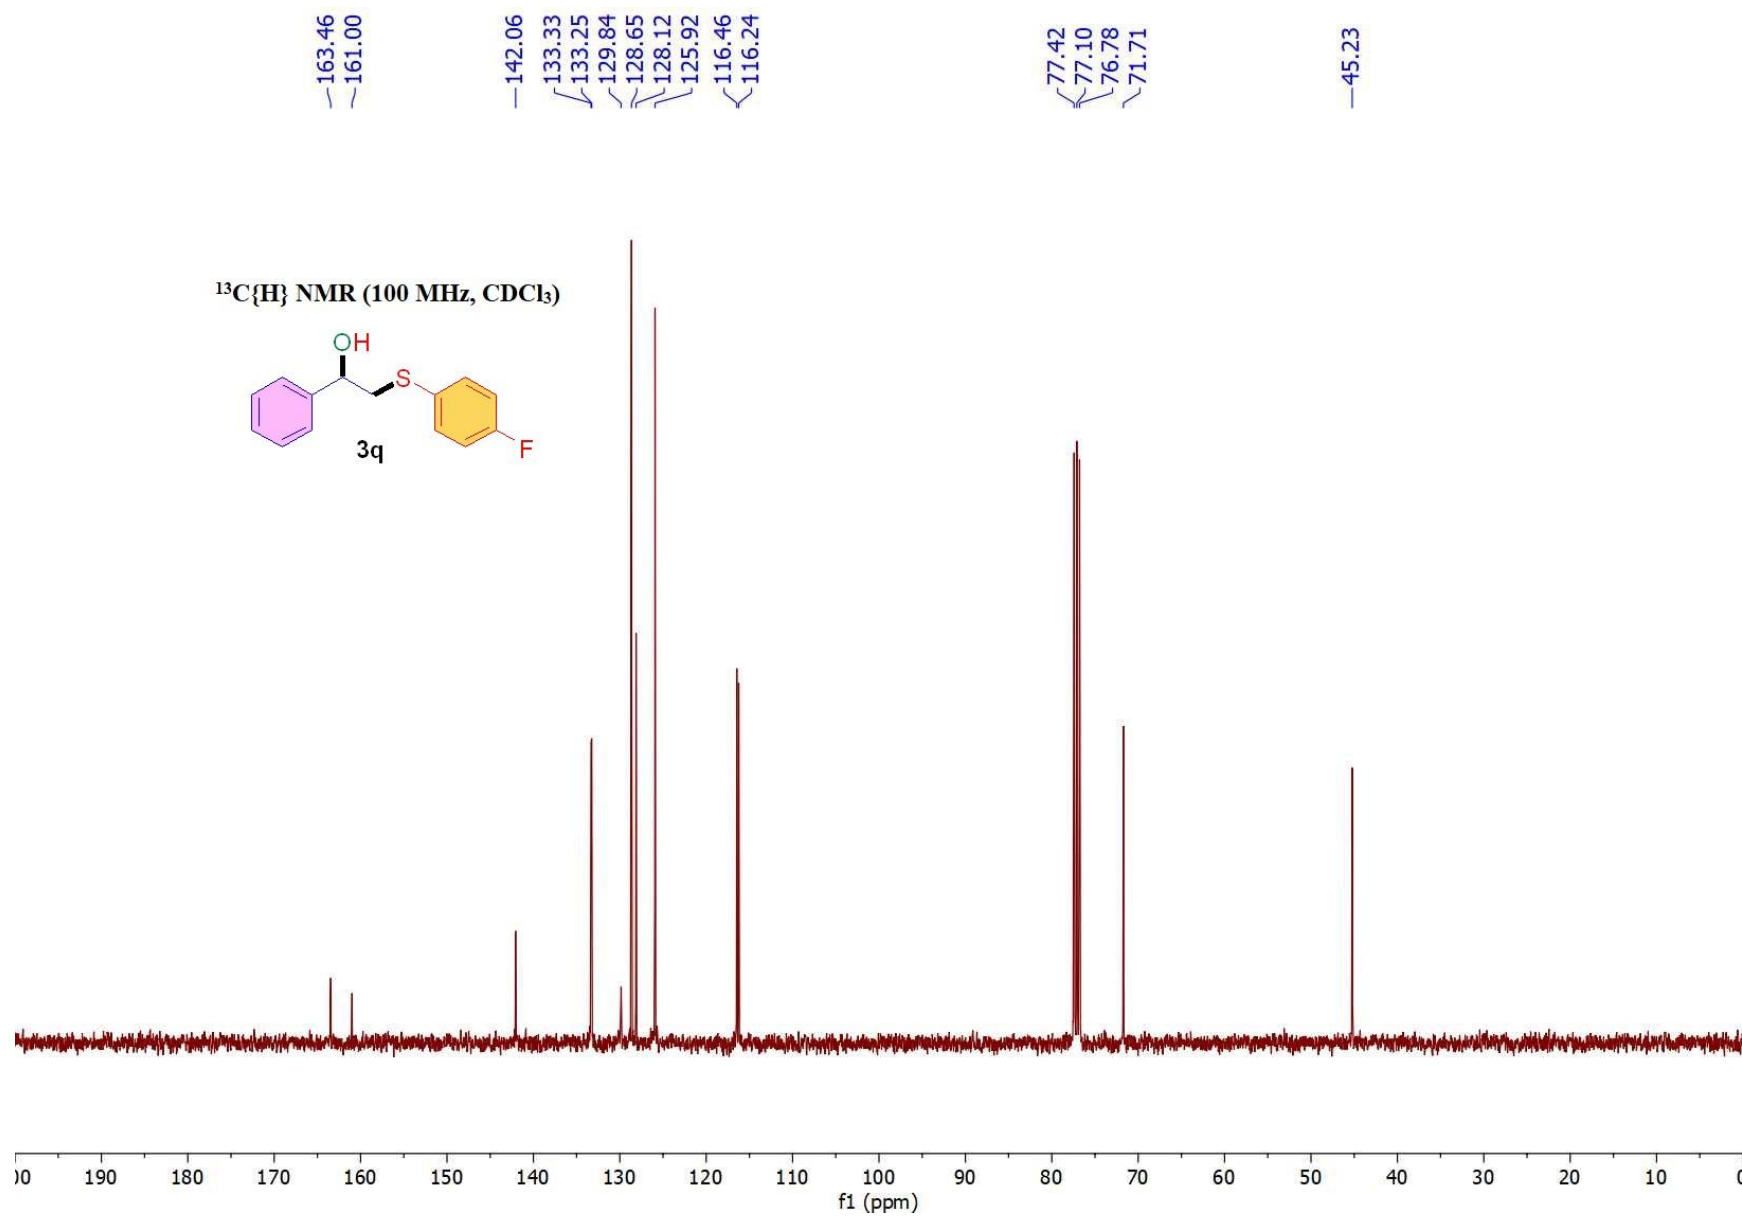

-114.268

$^{19}\text{F}$  NMR (376 MHz,  $\text{CDCl}_3$ )

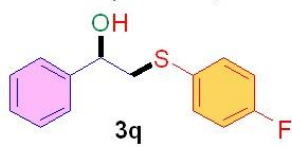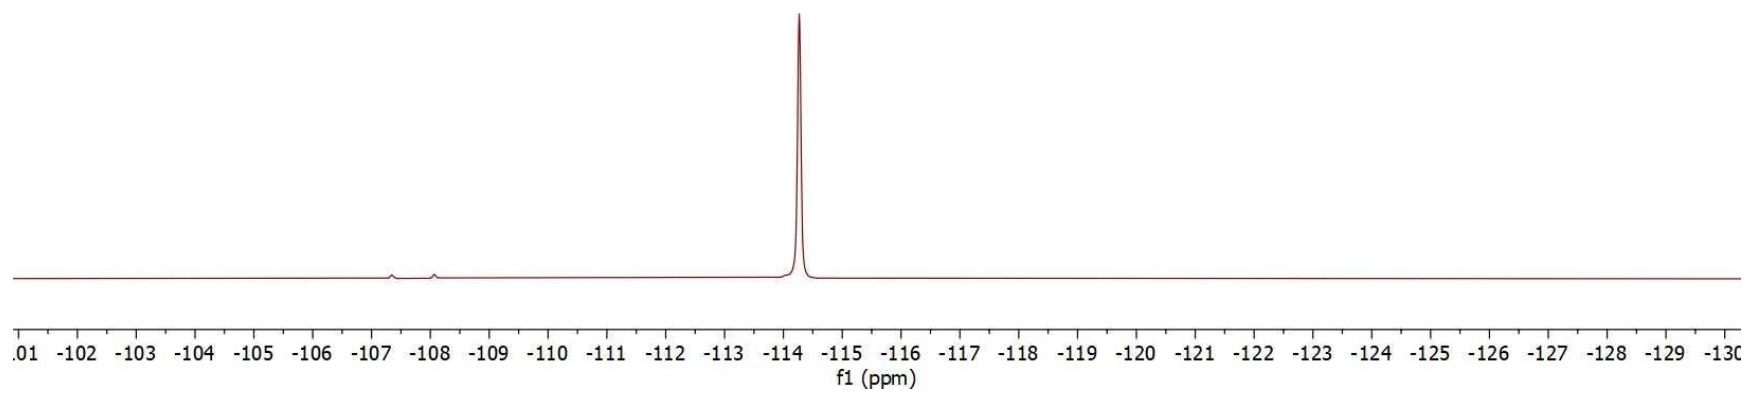

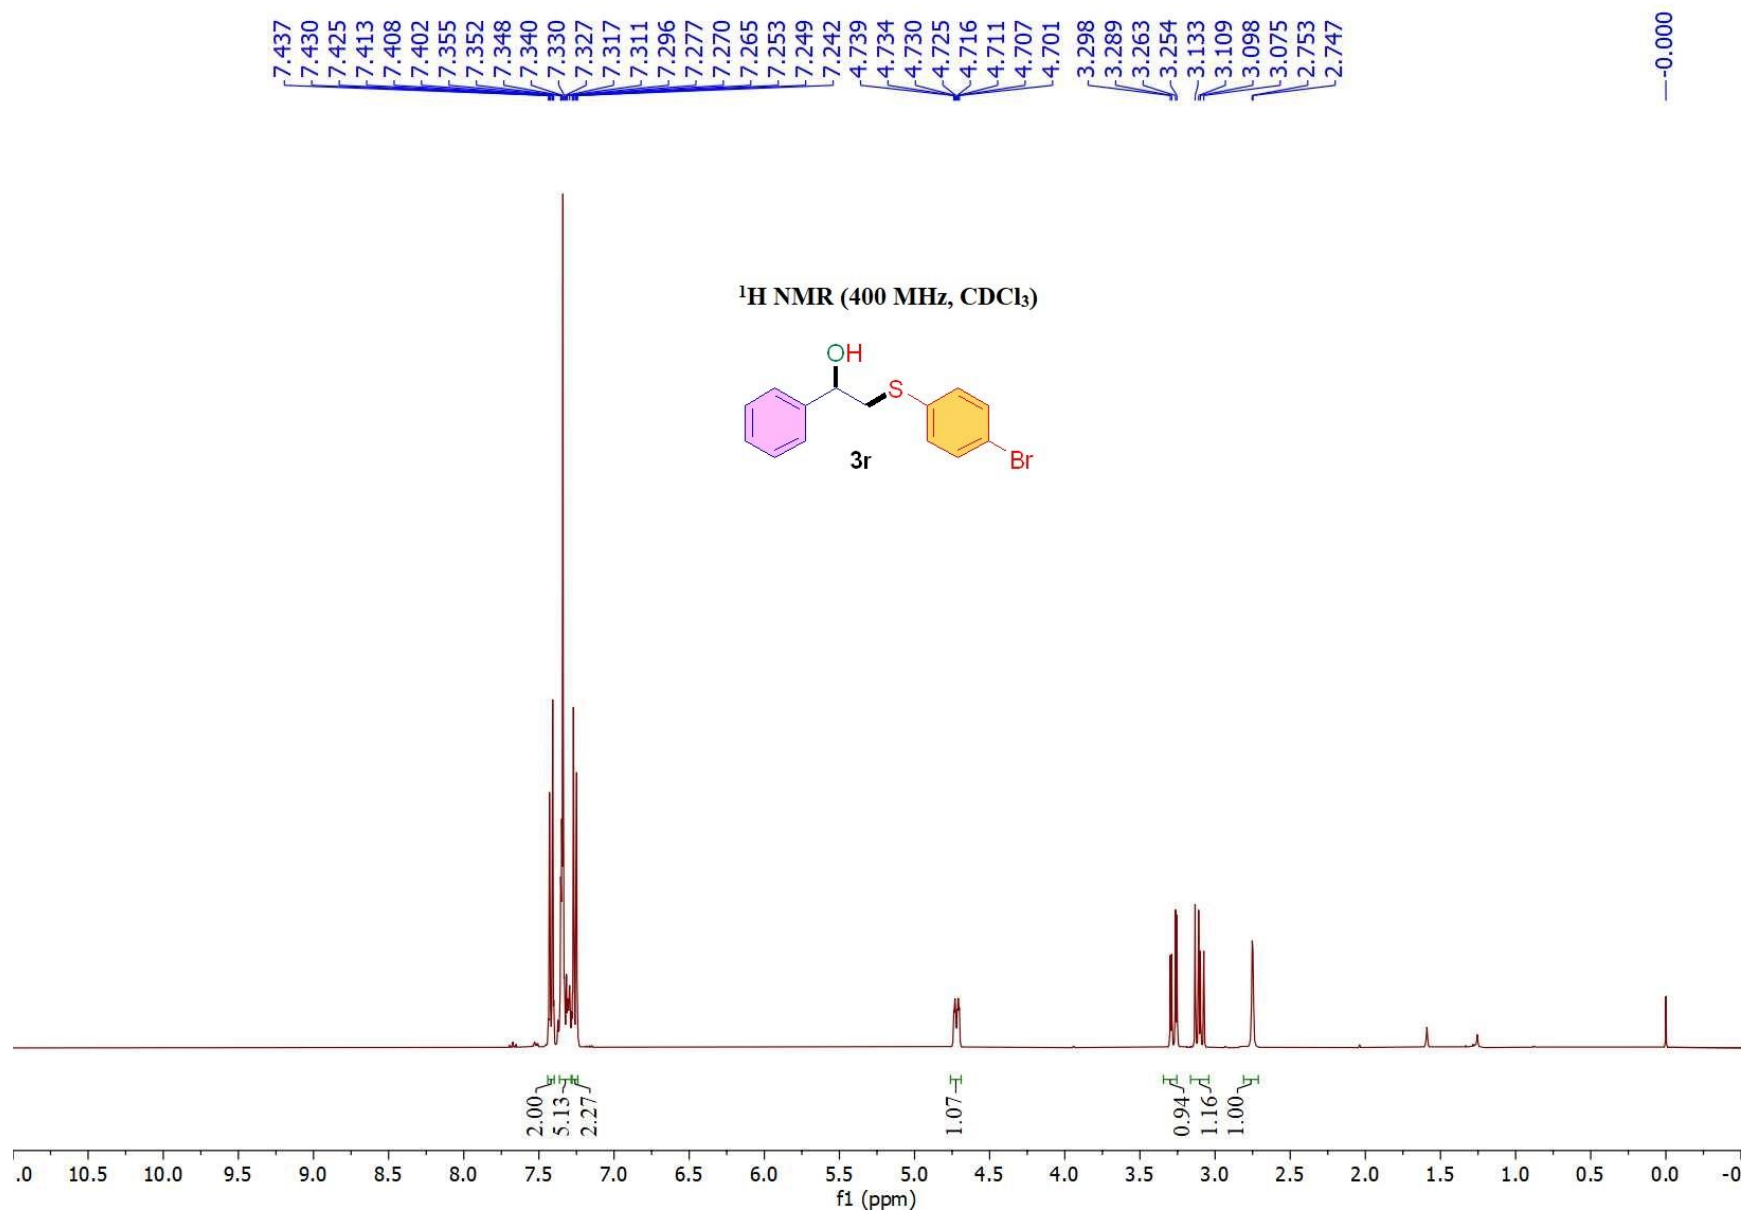

142.02  
134.35  
132.23  
131.67  
128.71  
128.21  
125.90  
120.73

77.42  
77.10  
76.78  
71.86

43.92

$^{13}\text{C}\{\text{H}\}$  NMR (100 MHz,  $\text{CDCl}_3$ )

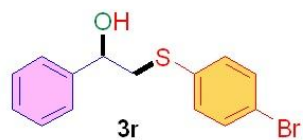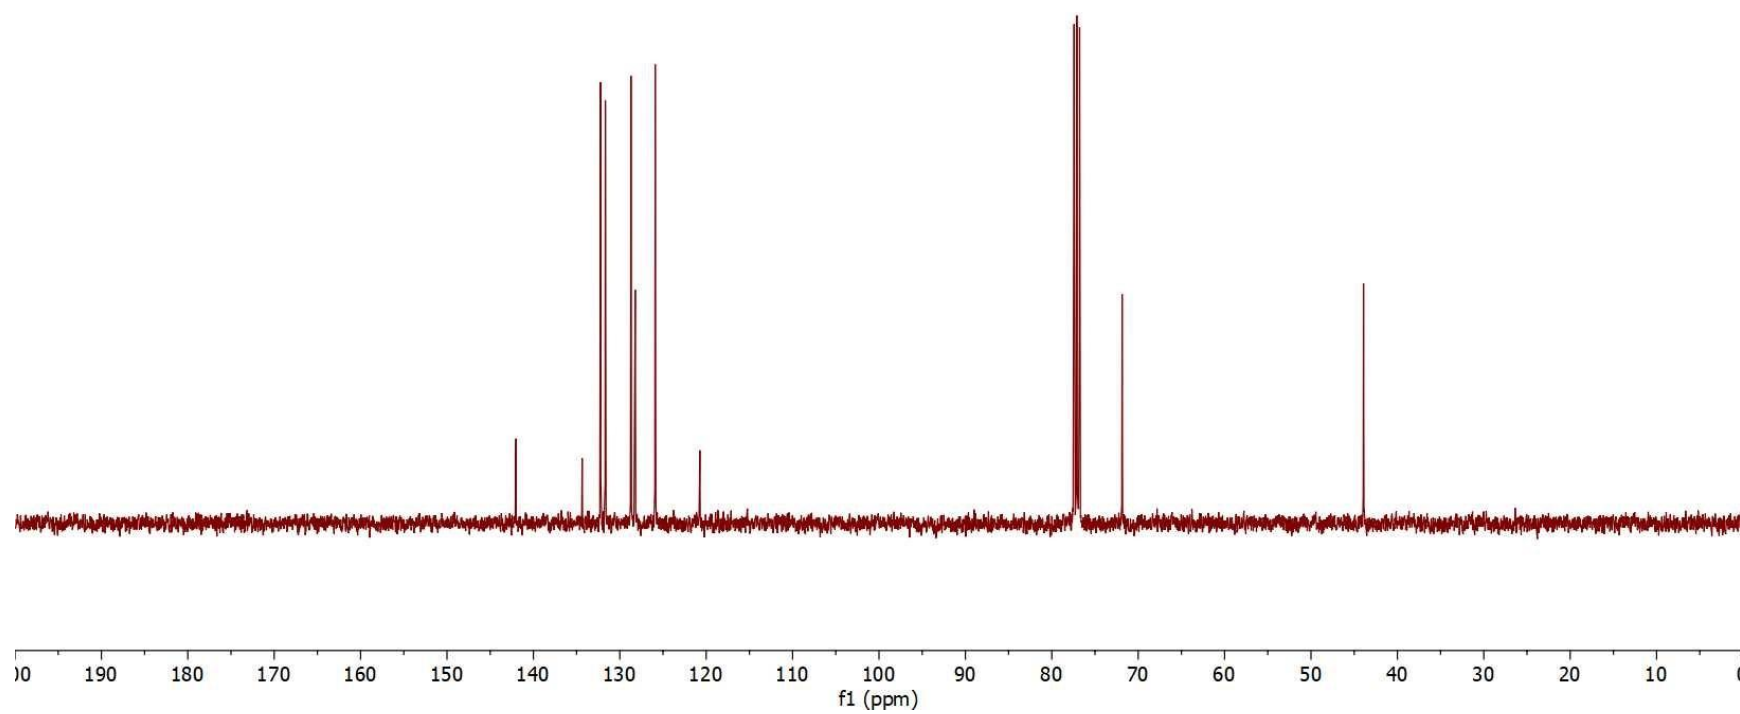

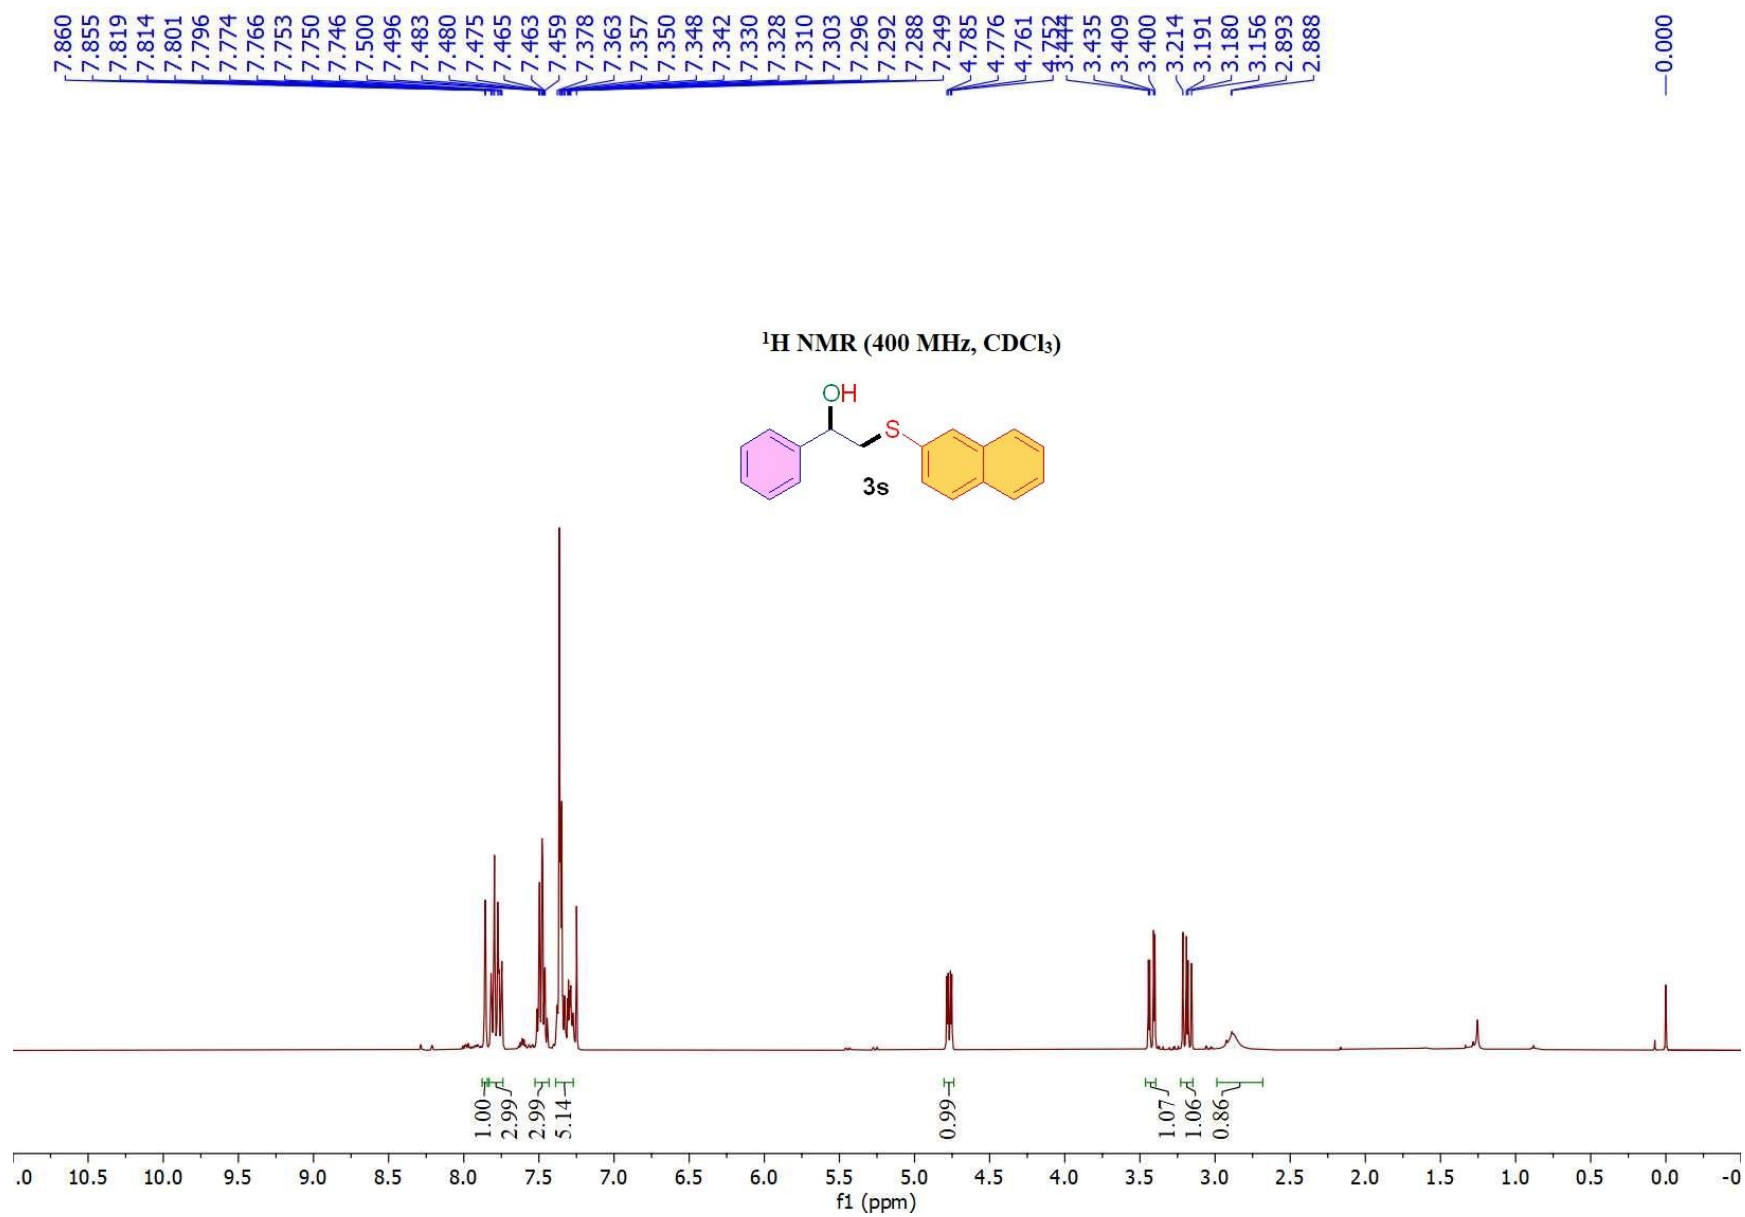

142.19  
 133.74  
 132.26  
 132.12  
 128.85  
 128.67  
 128.57  
 128.12  
 127.92  
 127.81  
 127.27  
 126.79  
 126.15  
 125.94  
 77.42  
 77.10  
 76.78  
 71.75  
 43.93

$^{13}\text{C}\{\text{H}\}$  NMR (100 MHz,  $\text{CDCl}_3$ )

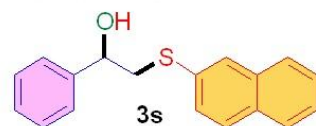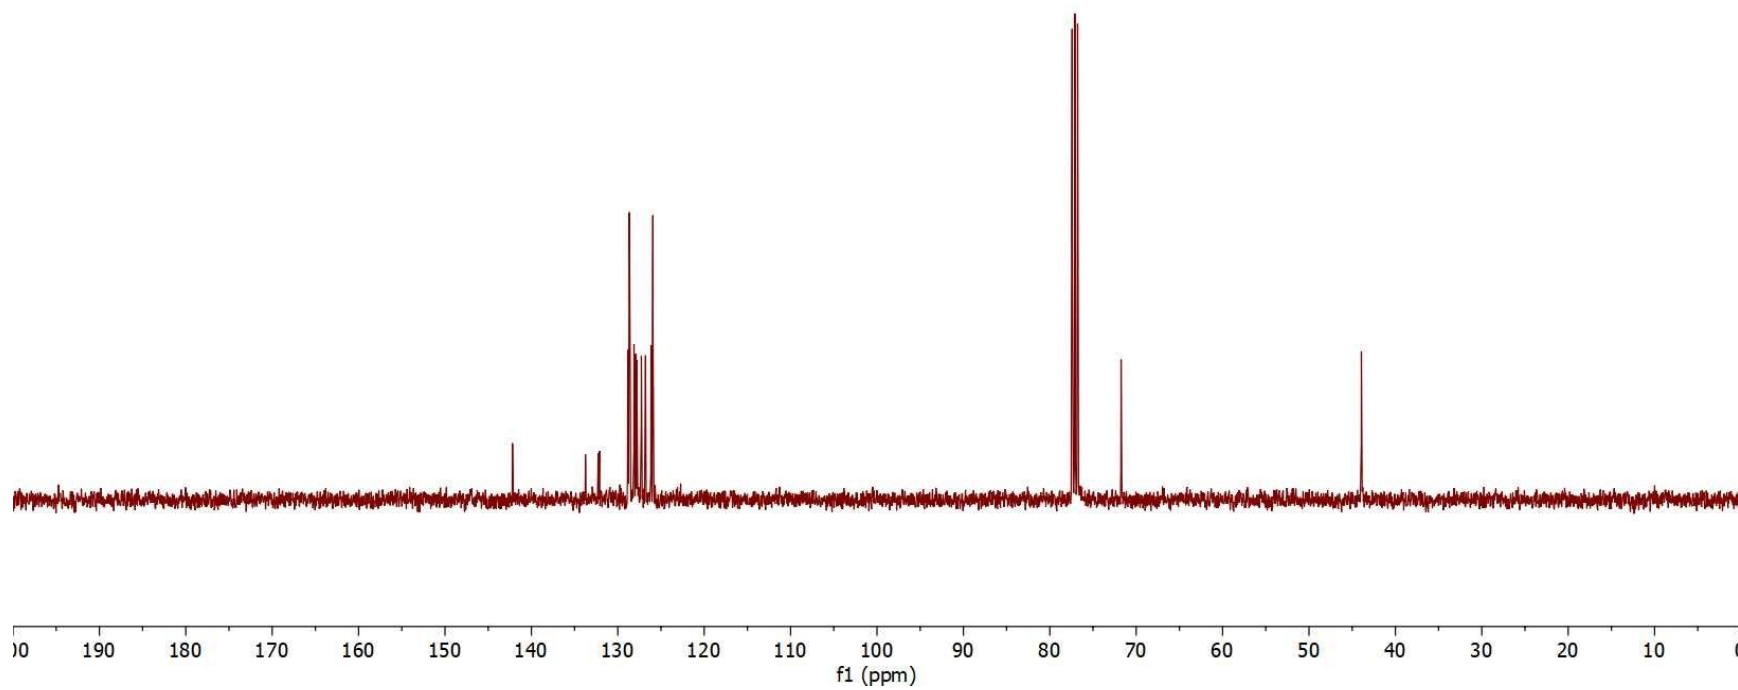

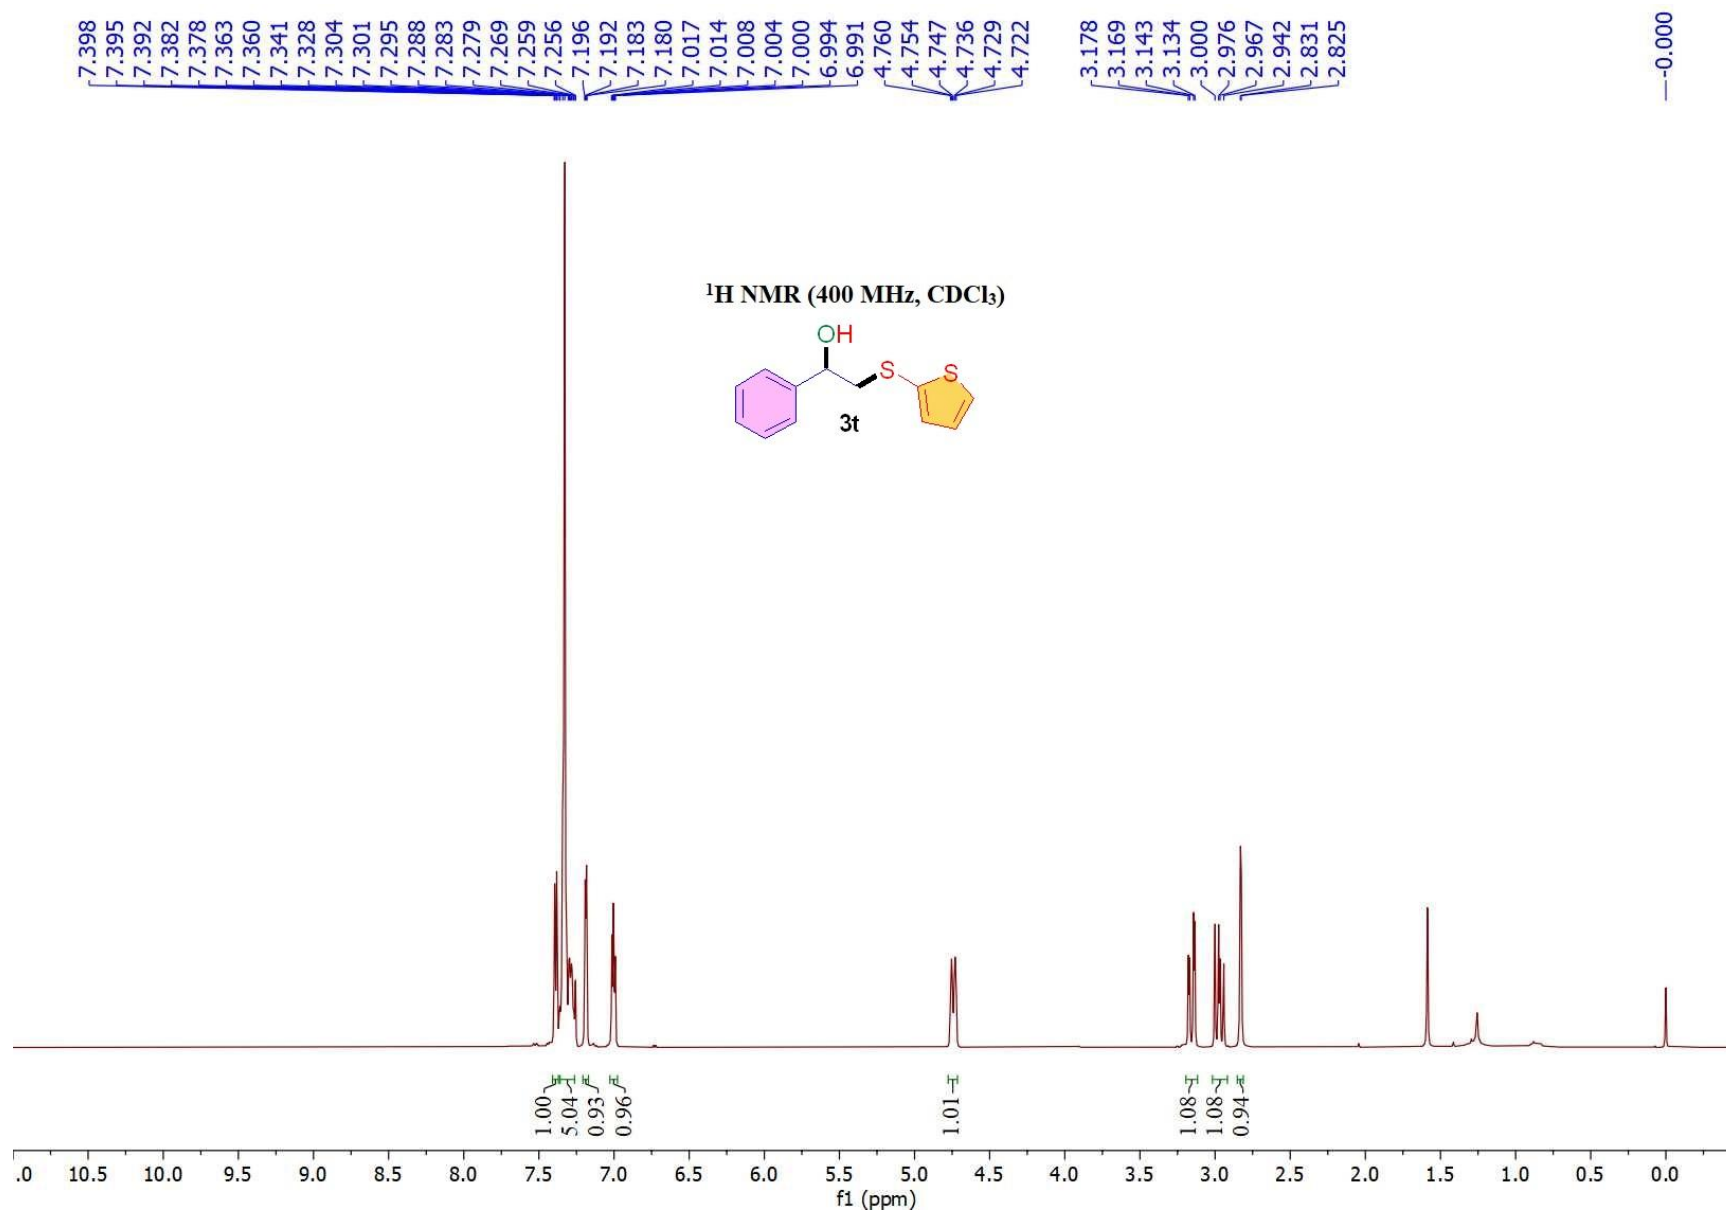

141.74  
134.34  
129.93  
128.63  
128.07  
127.82  
125.98

77.42  
77.10  
76.78  
71.60

48.34

$^{13}\text{C}\{\text{H}\}$  NMR (100 MHz,  $\text{CDCl}_3$ )

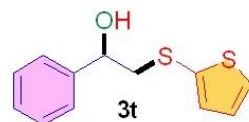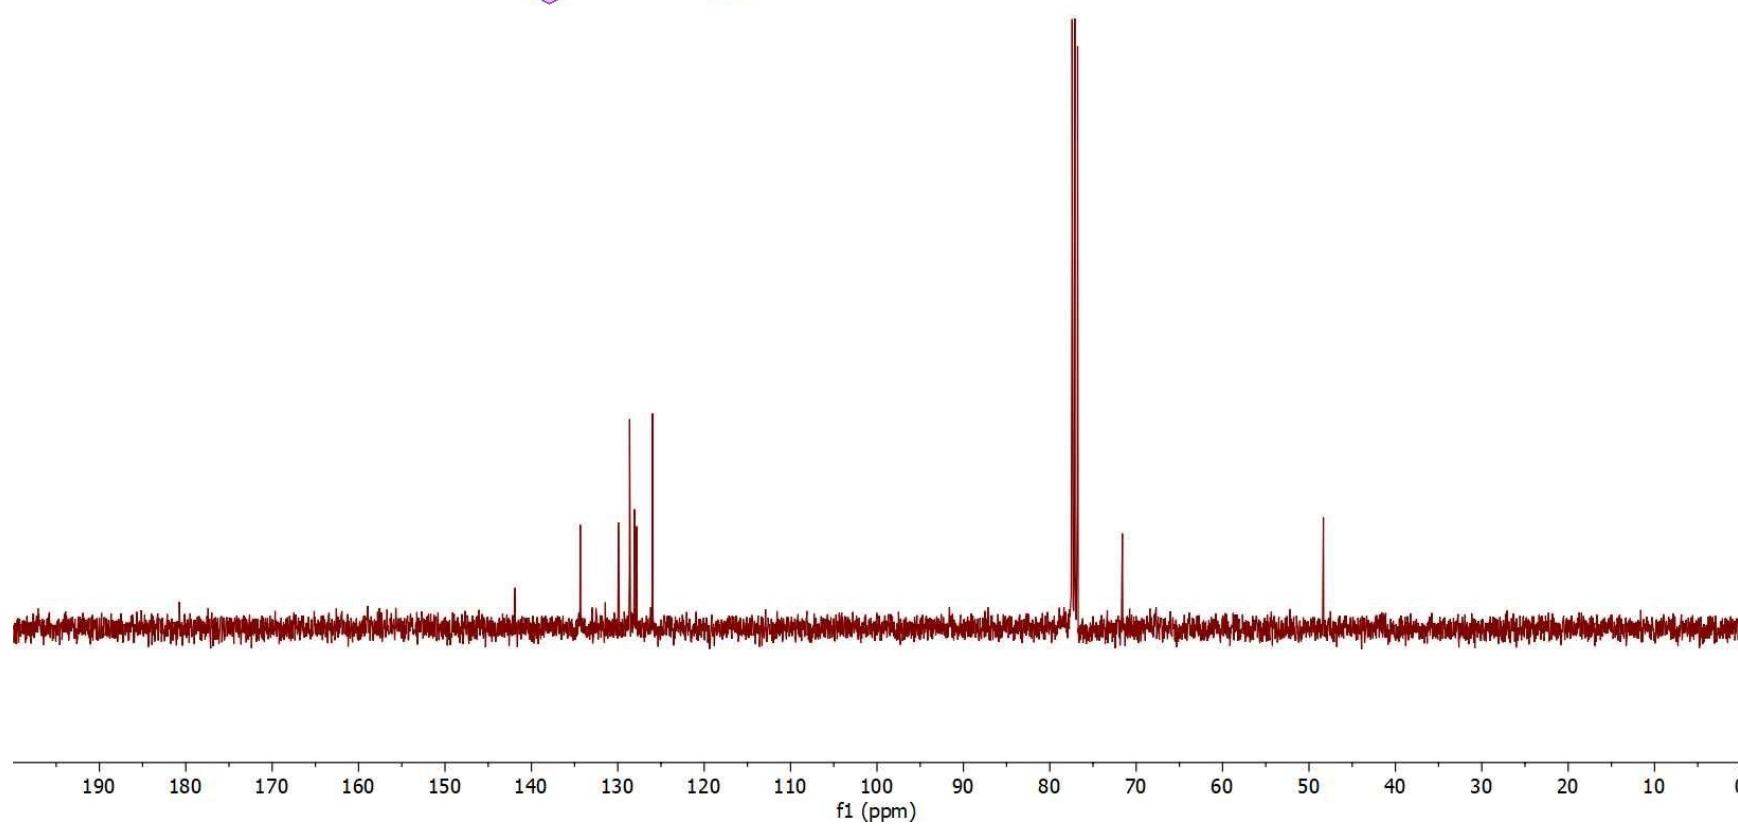

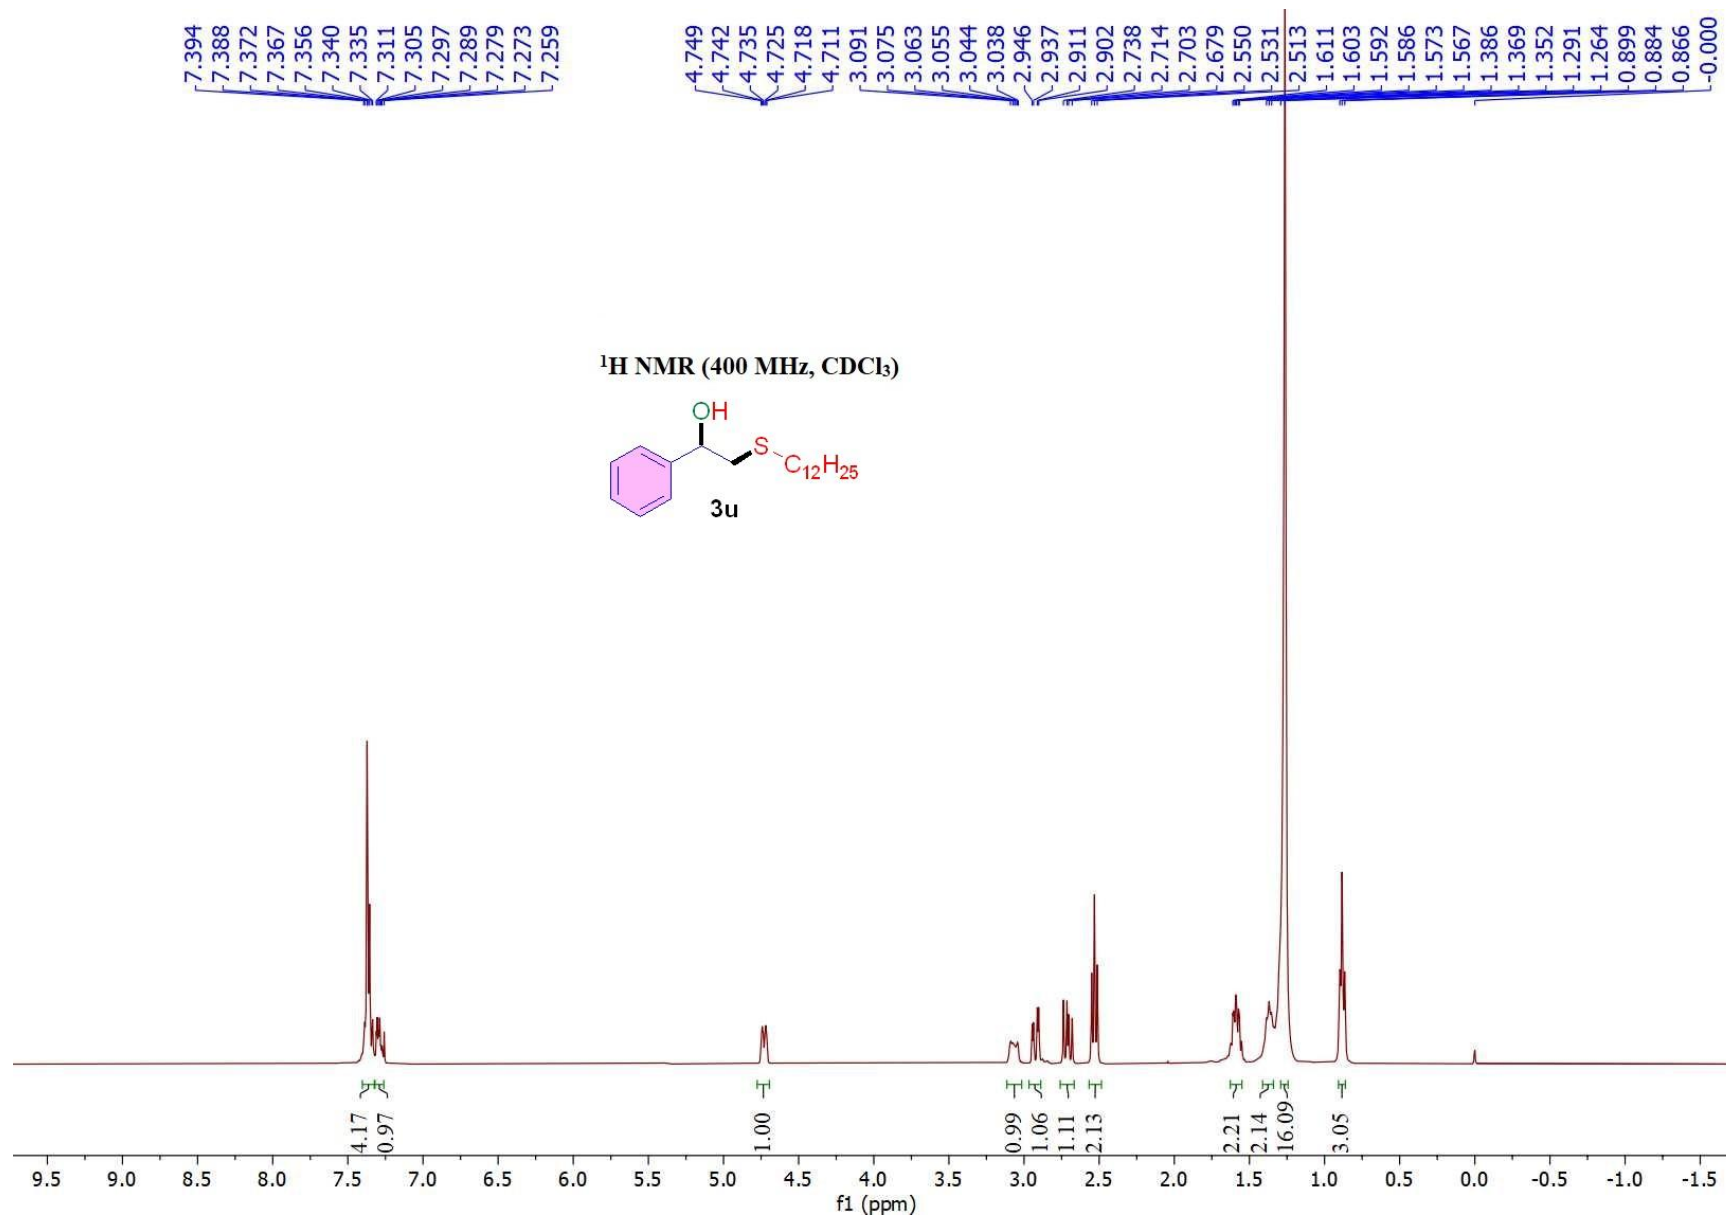

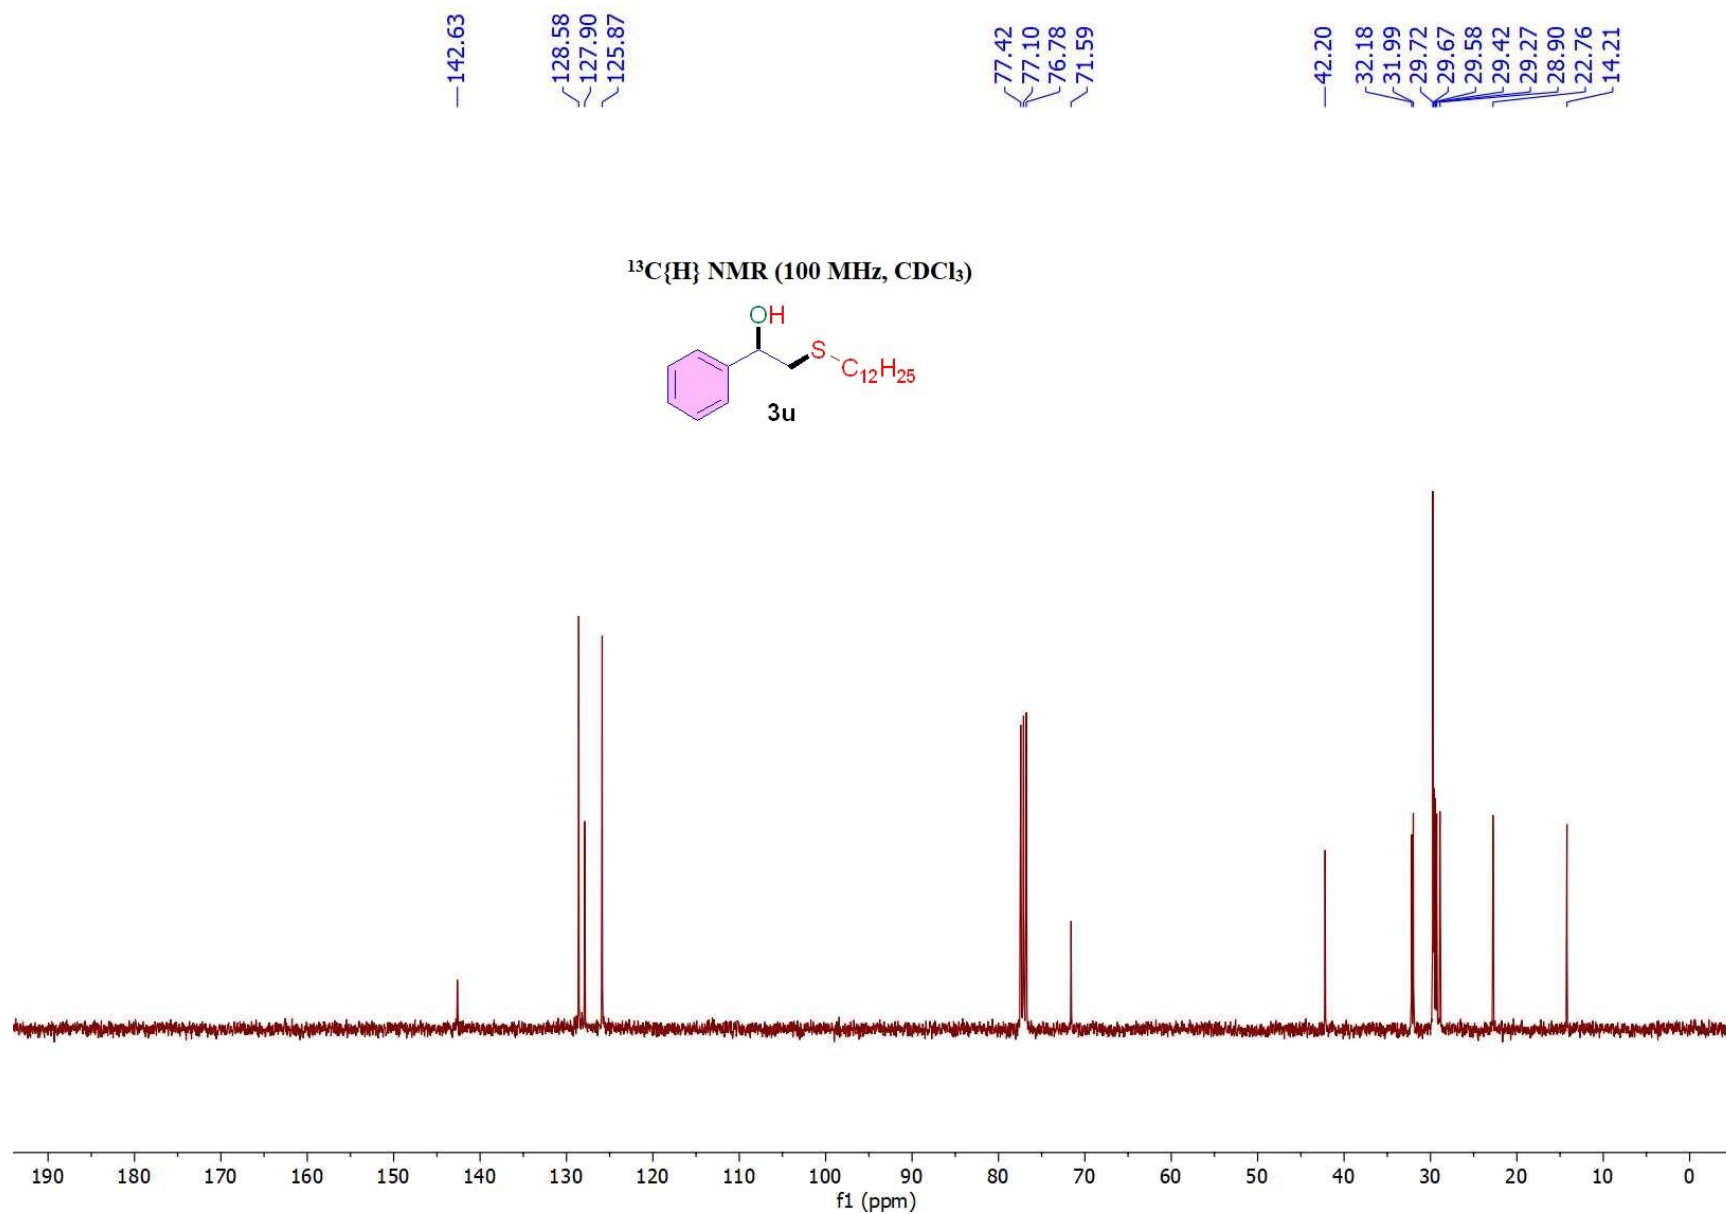

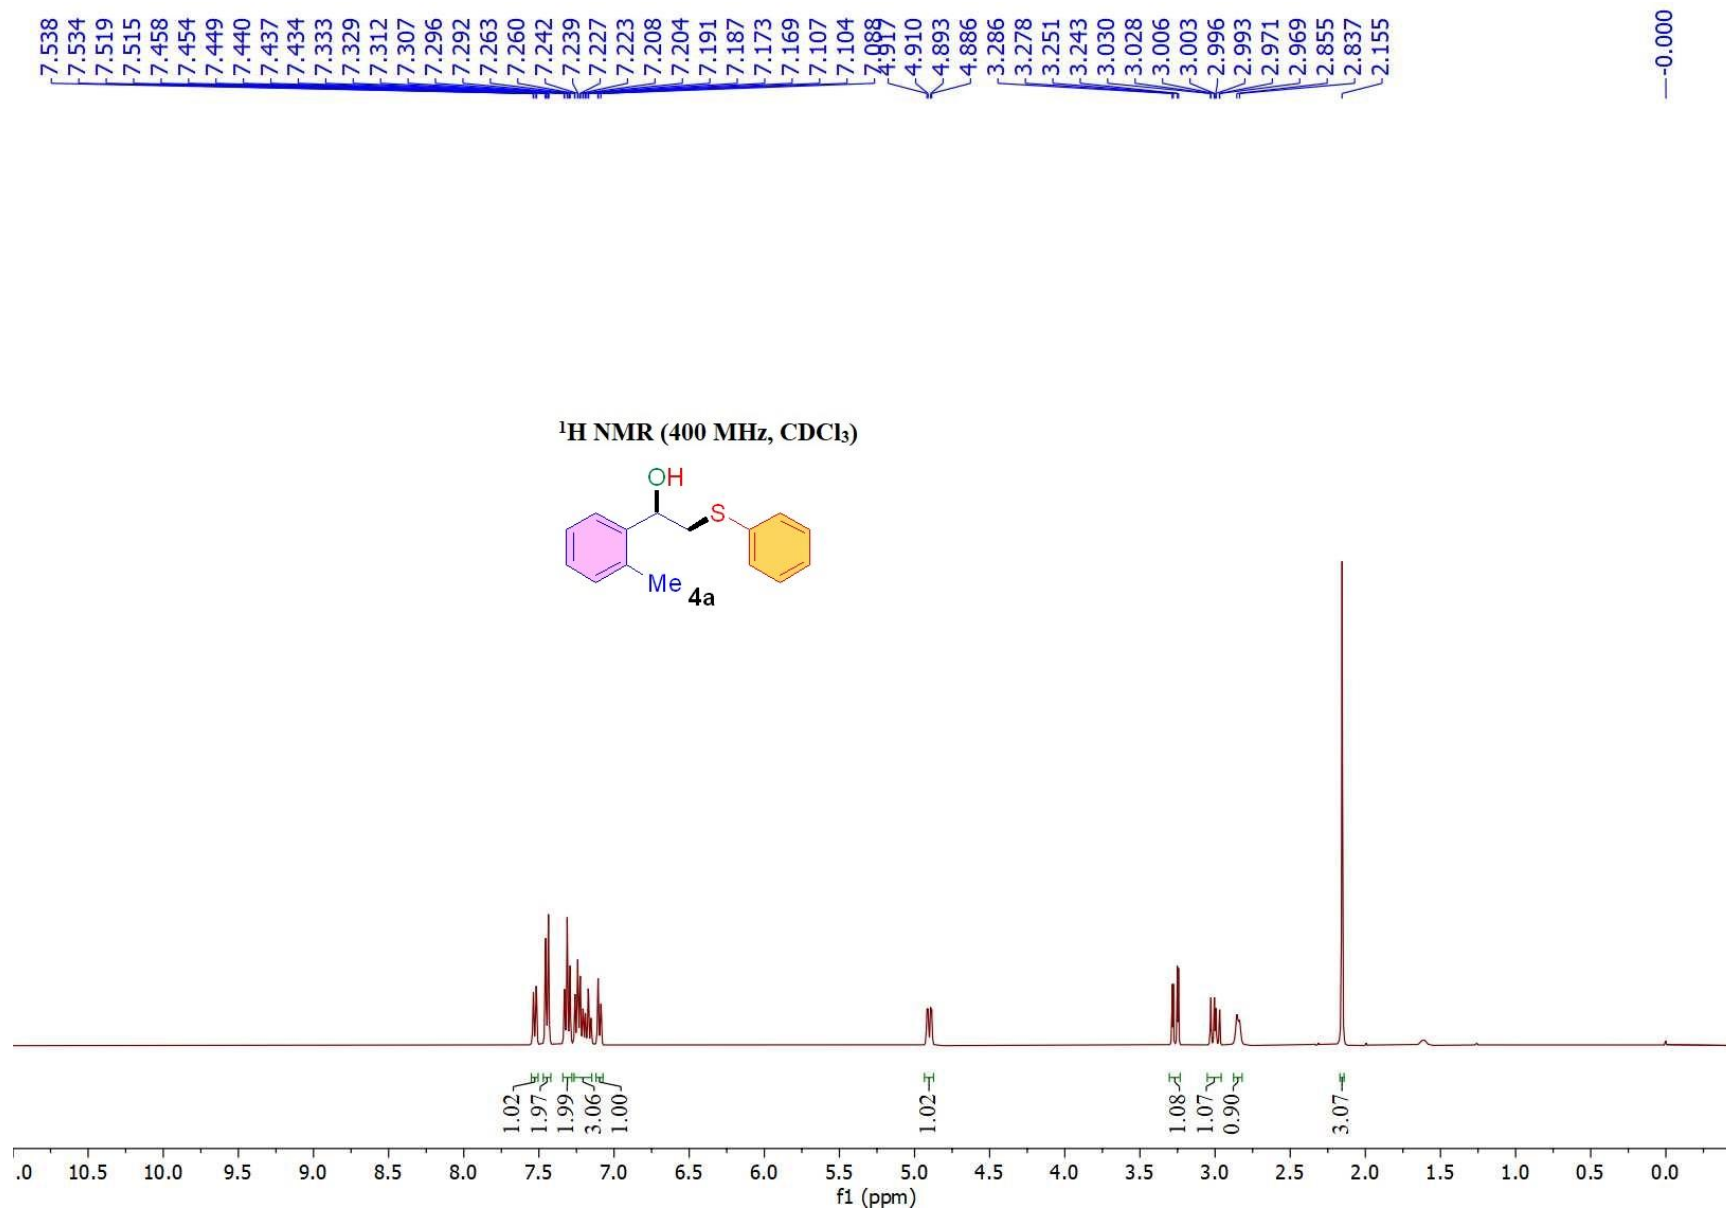

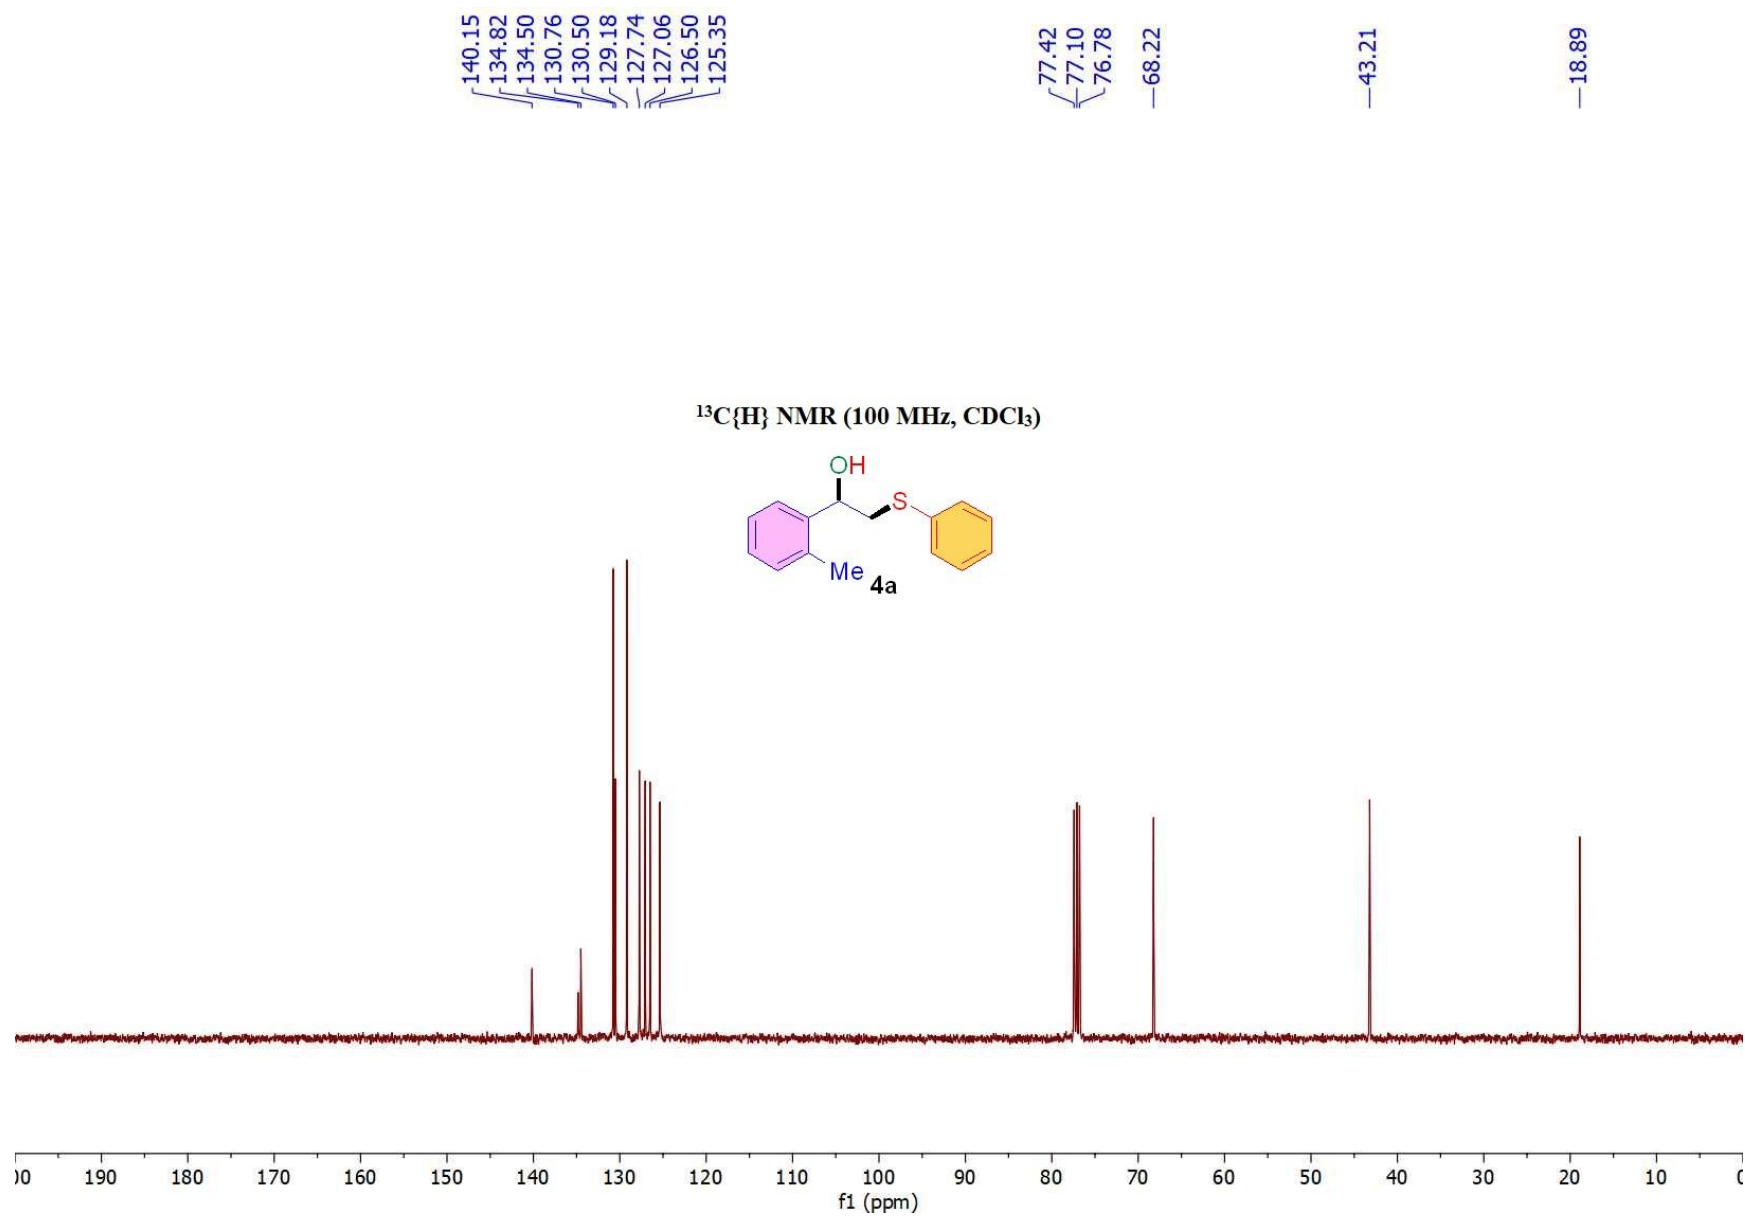

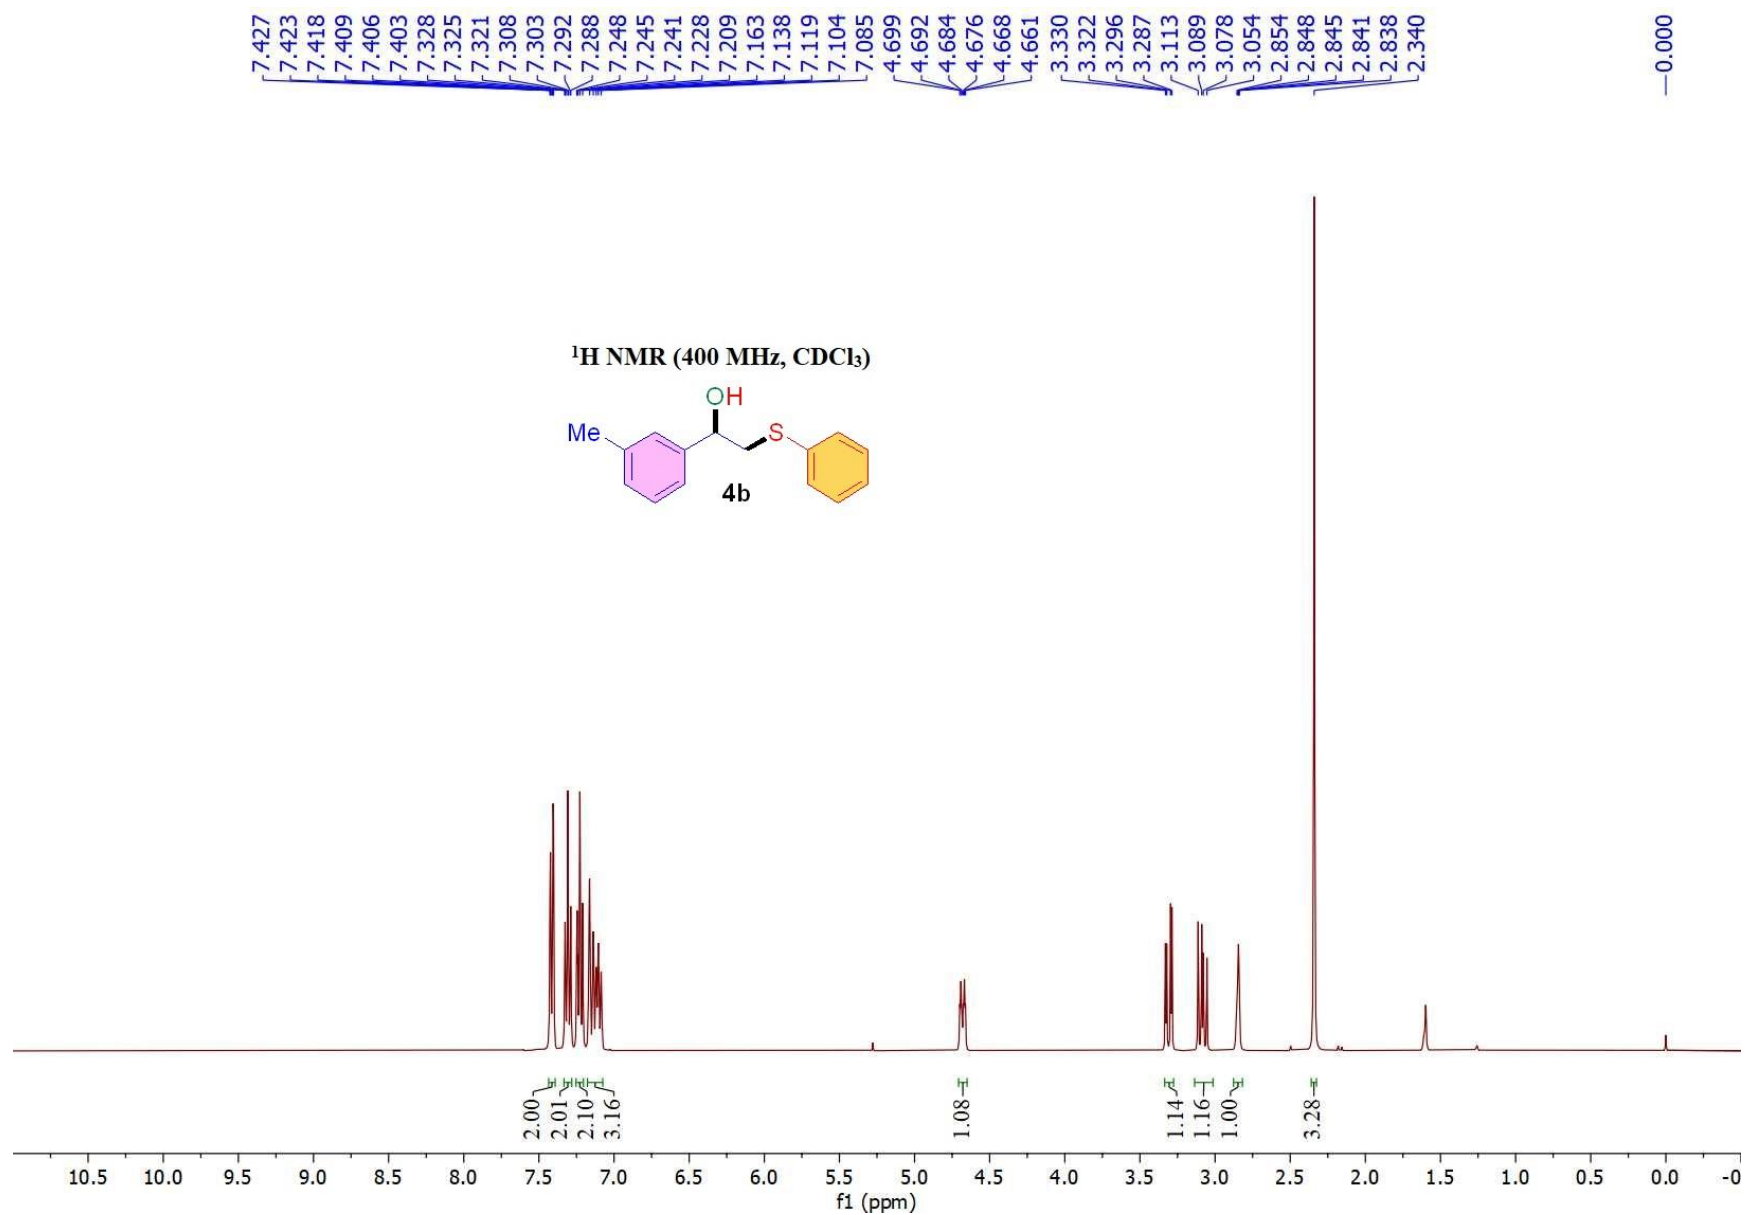

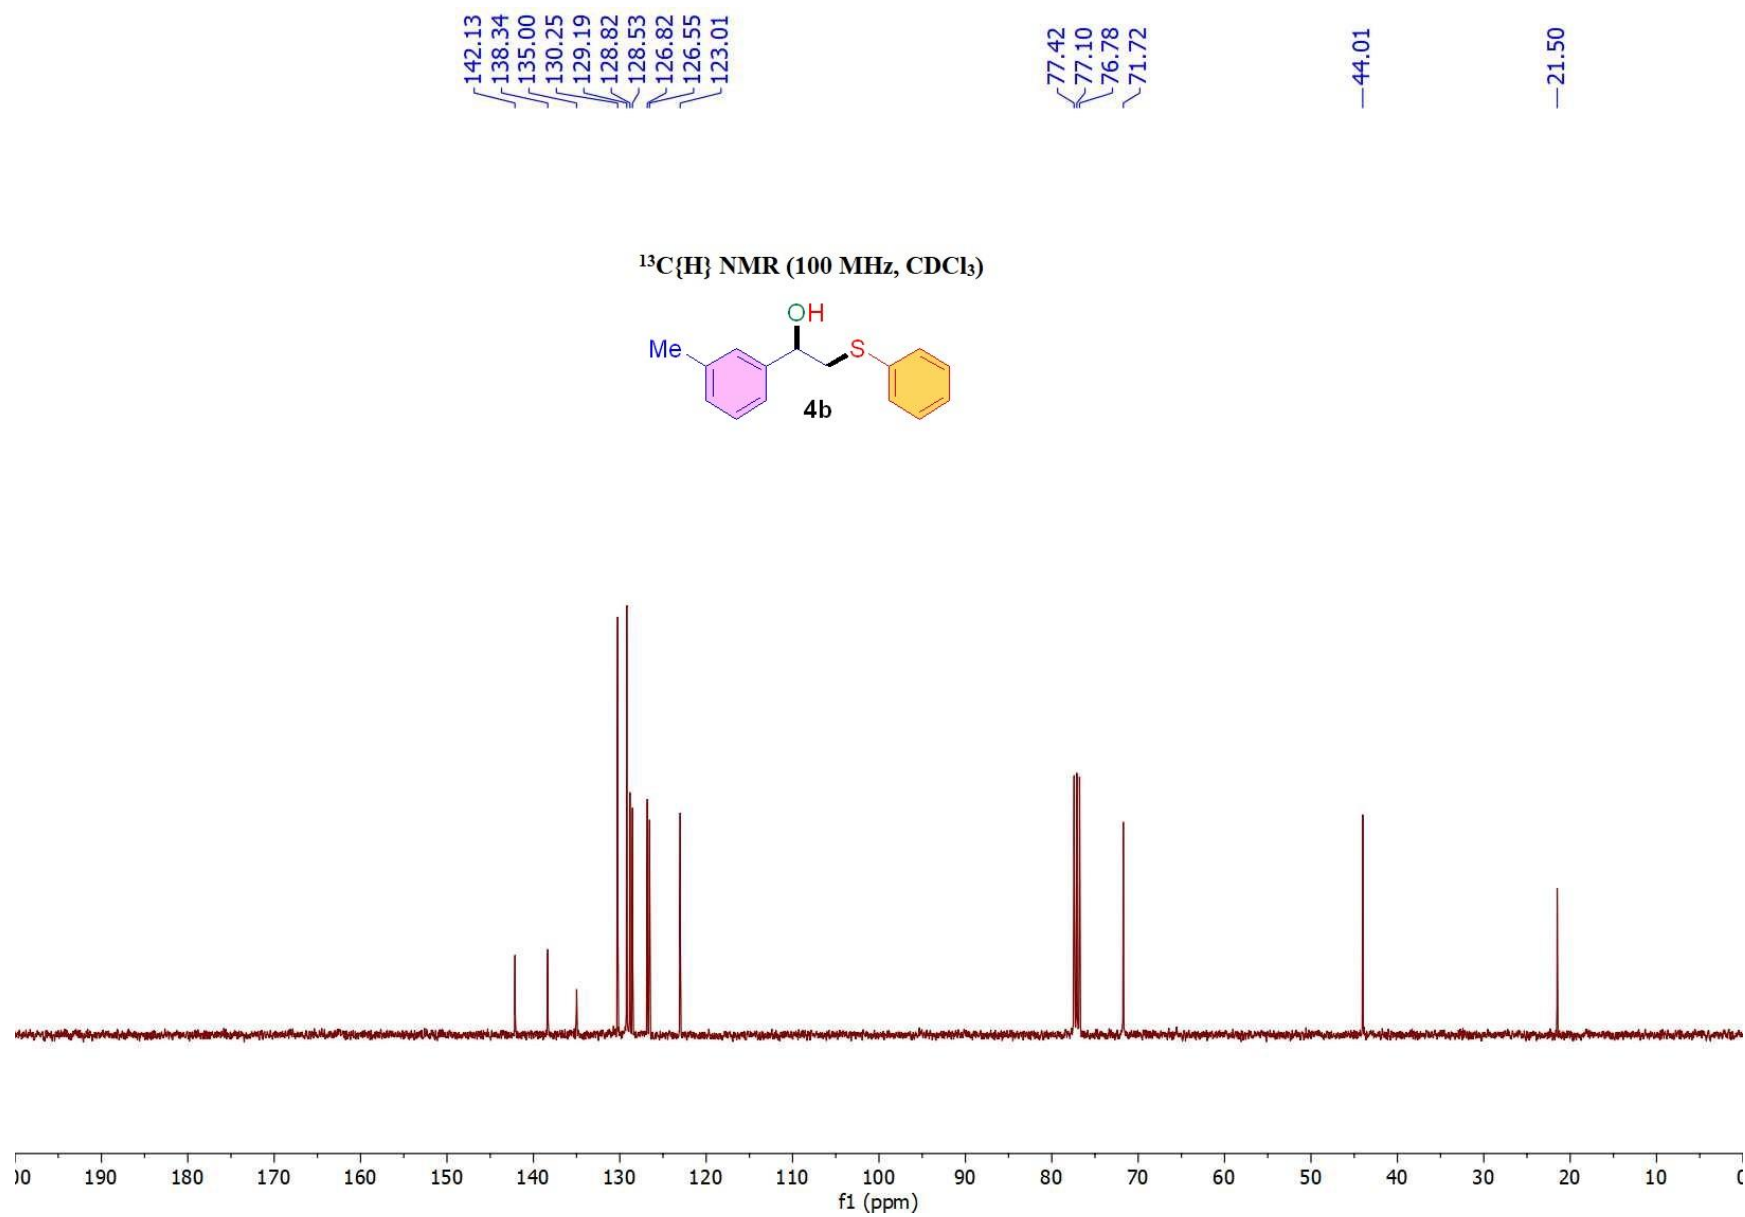

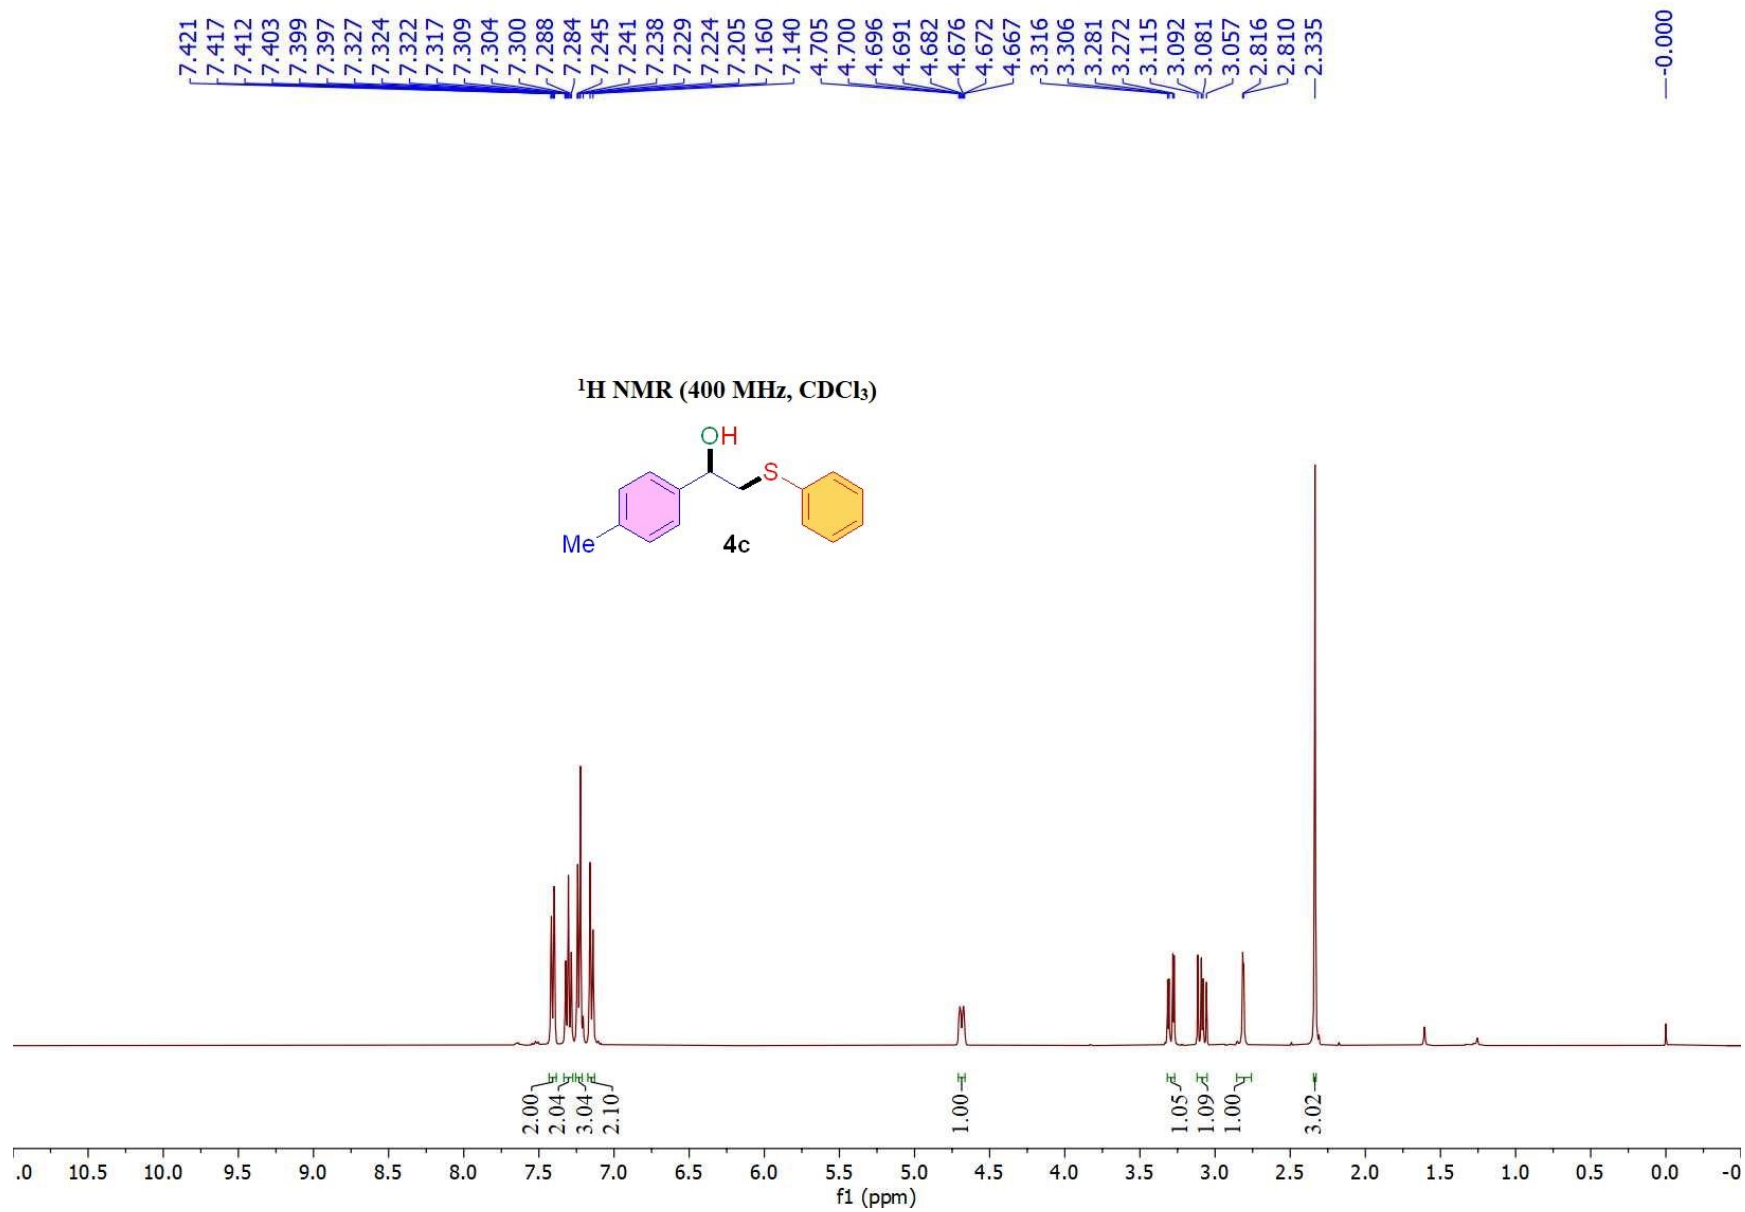

139.24  
137.80  
135.03  
130.18  
129.30  
129.18  
126.77  
125.86

77.42  
77.10  
76.78  
71.56

43.95

21.22

$^{13}\text{C}\{\text{H}\}$  NMR (100 MHz,  $\text{CDCl}_3$ )

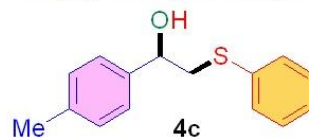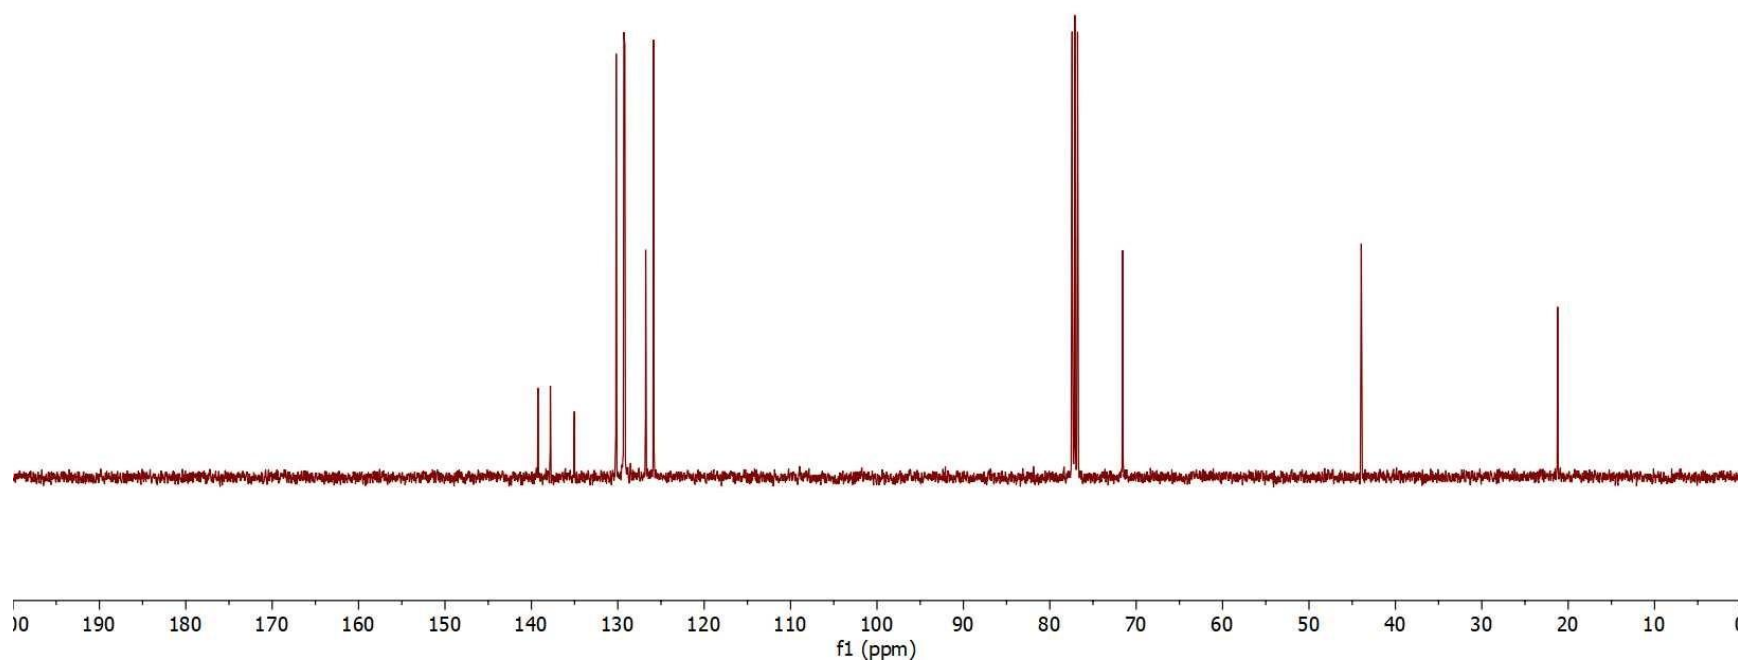

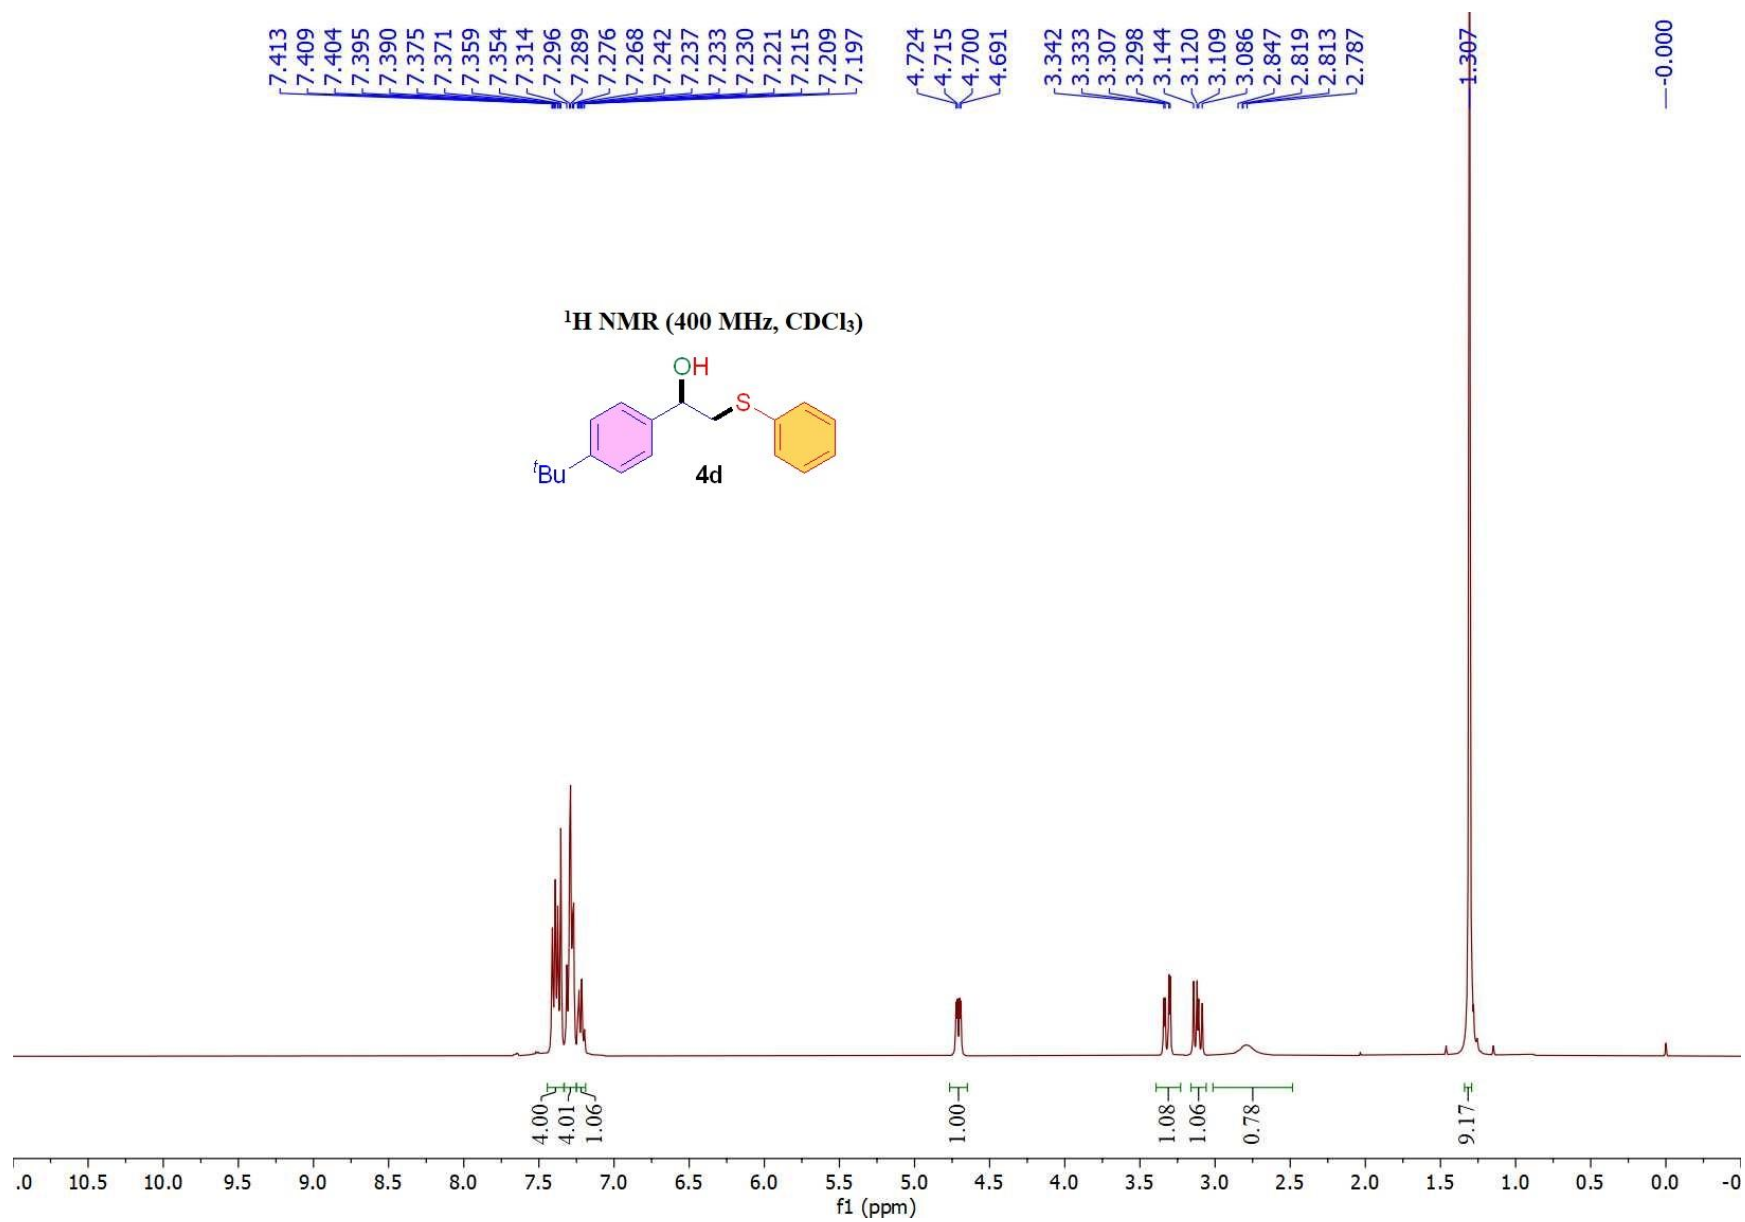

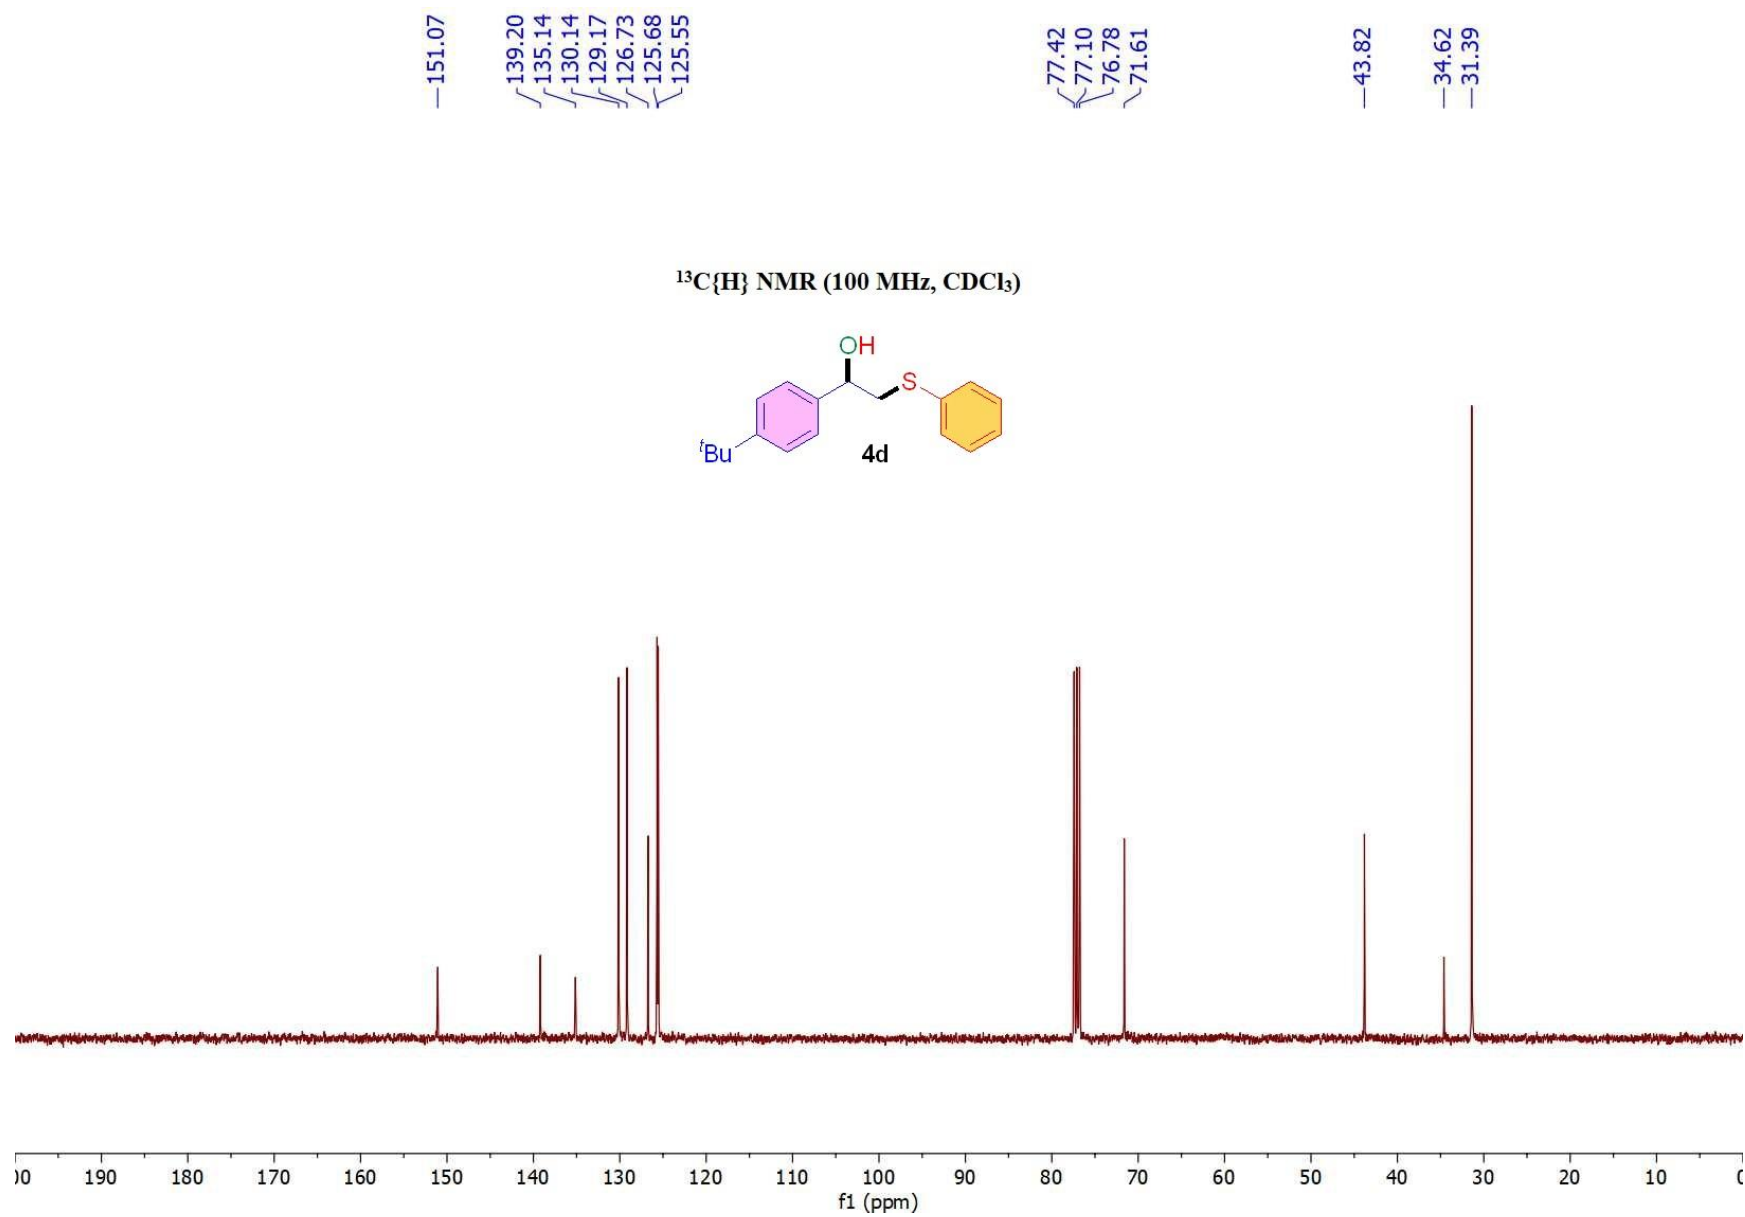

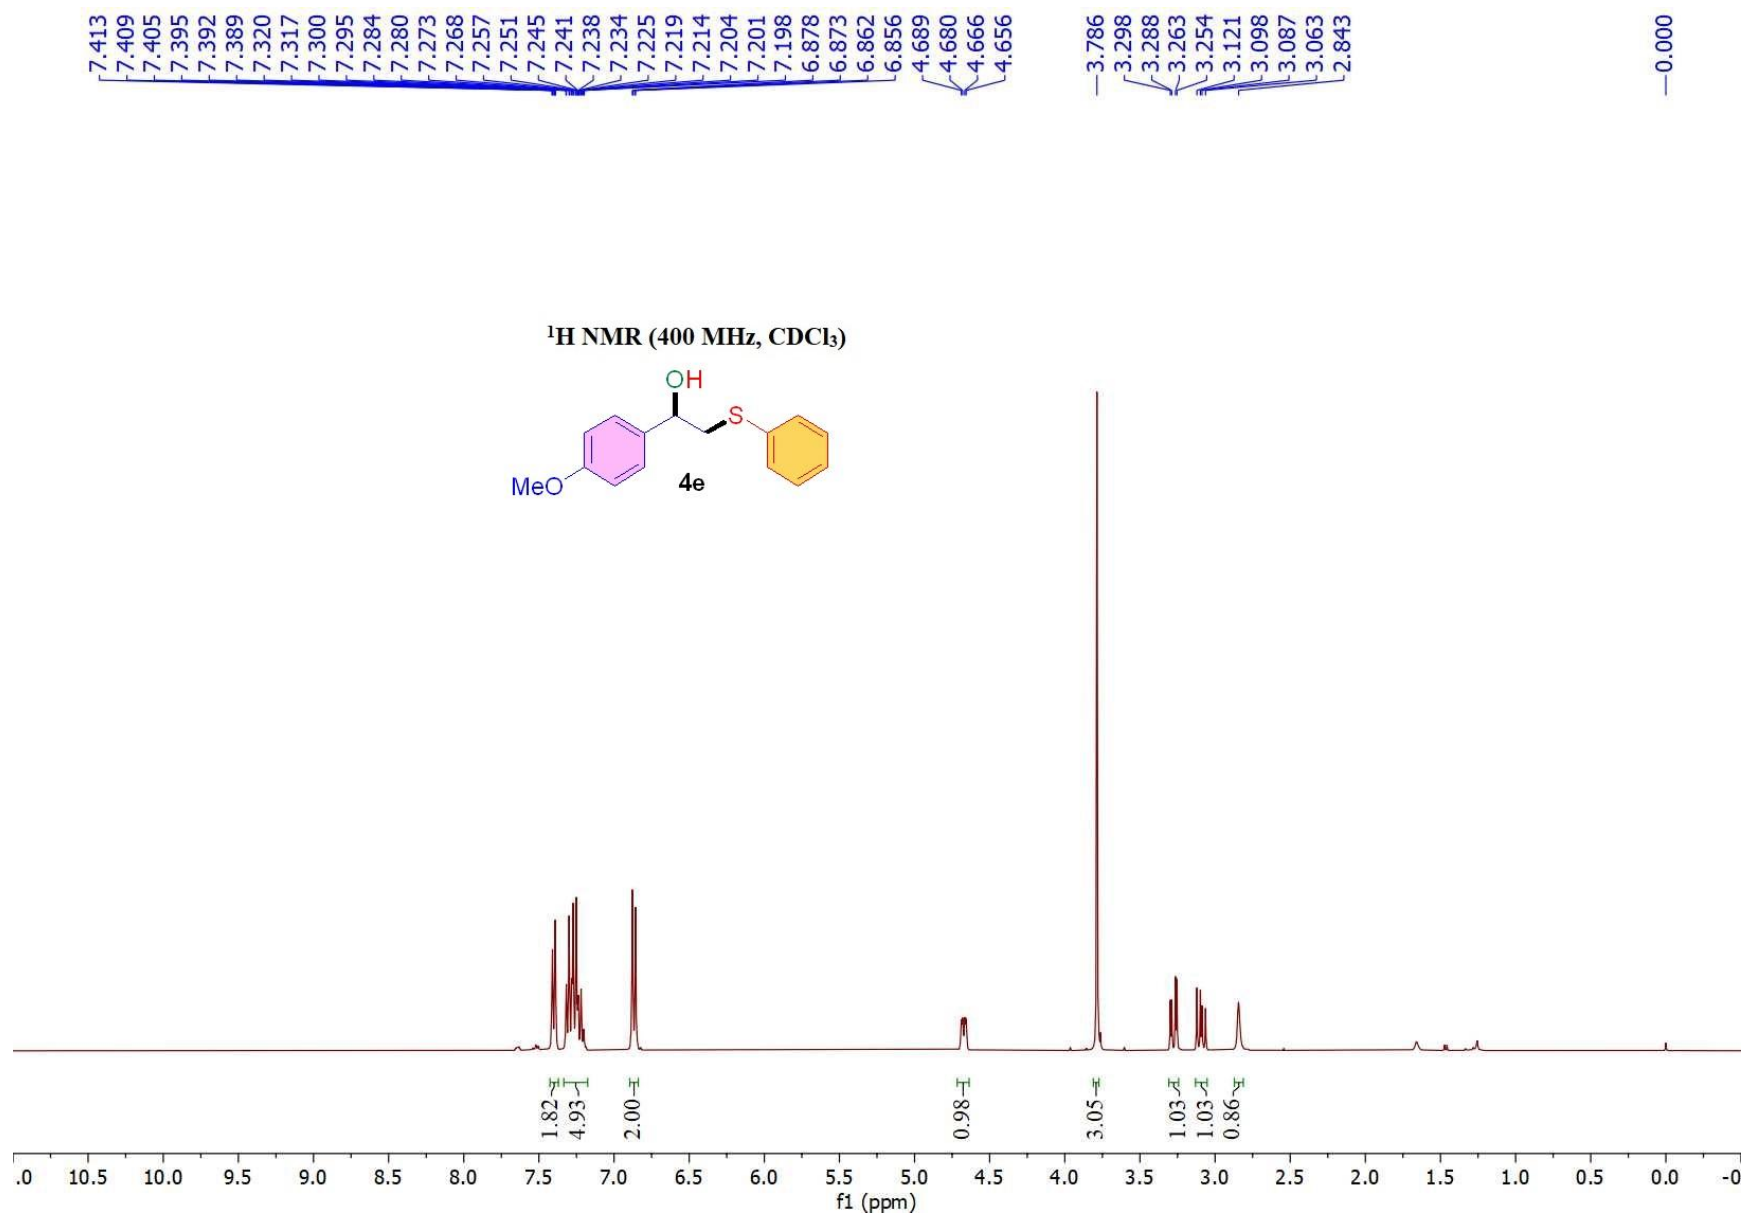

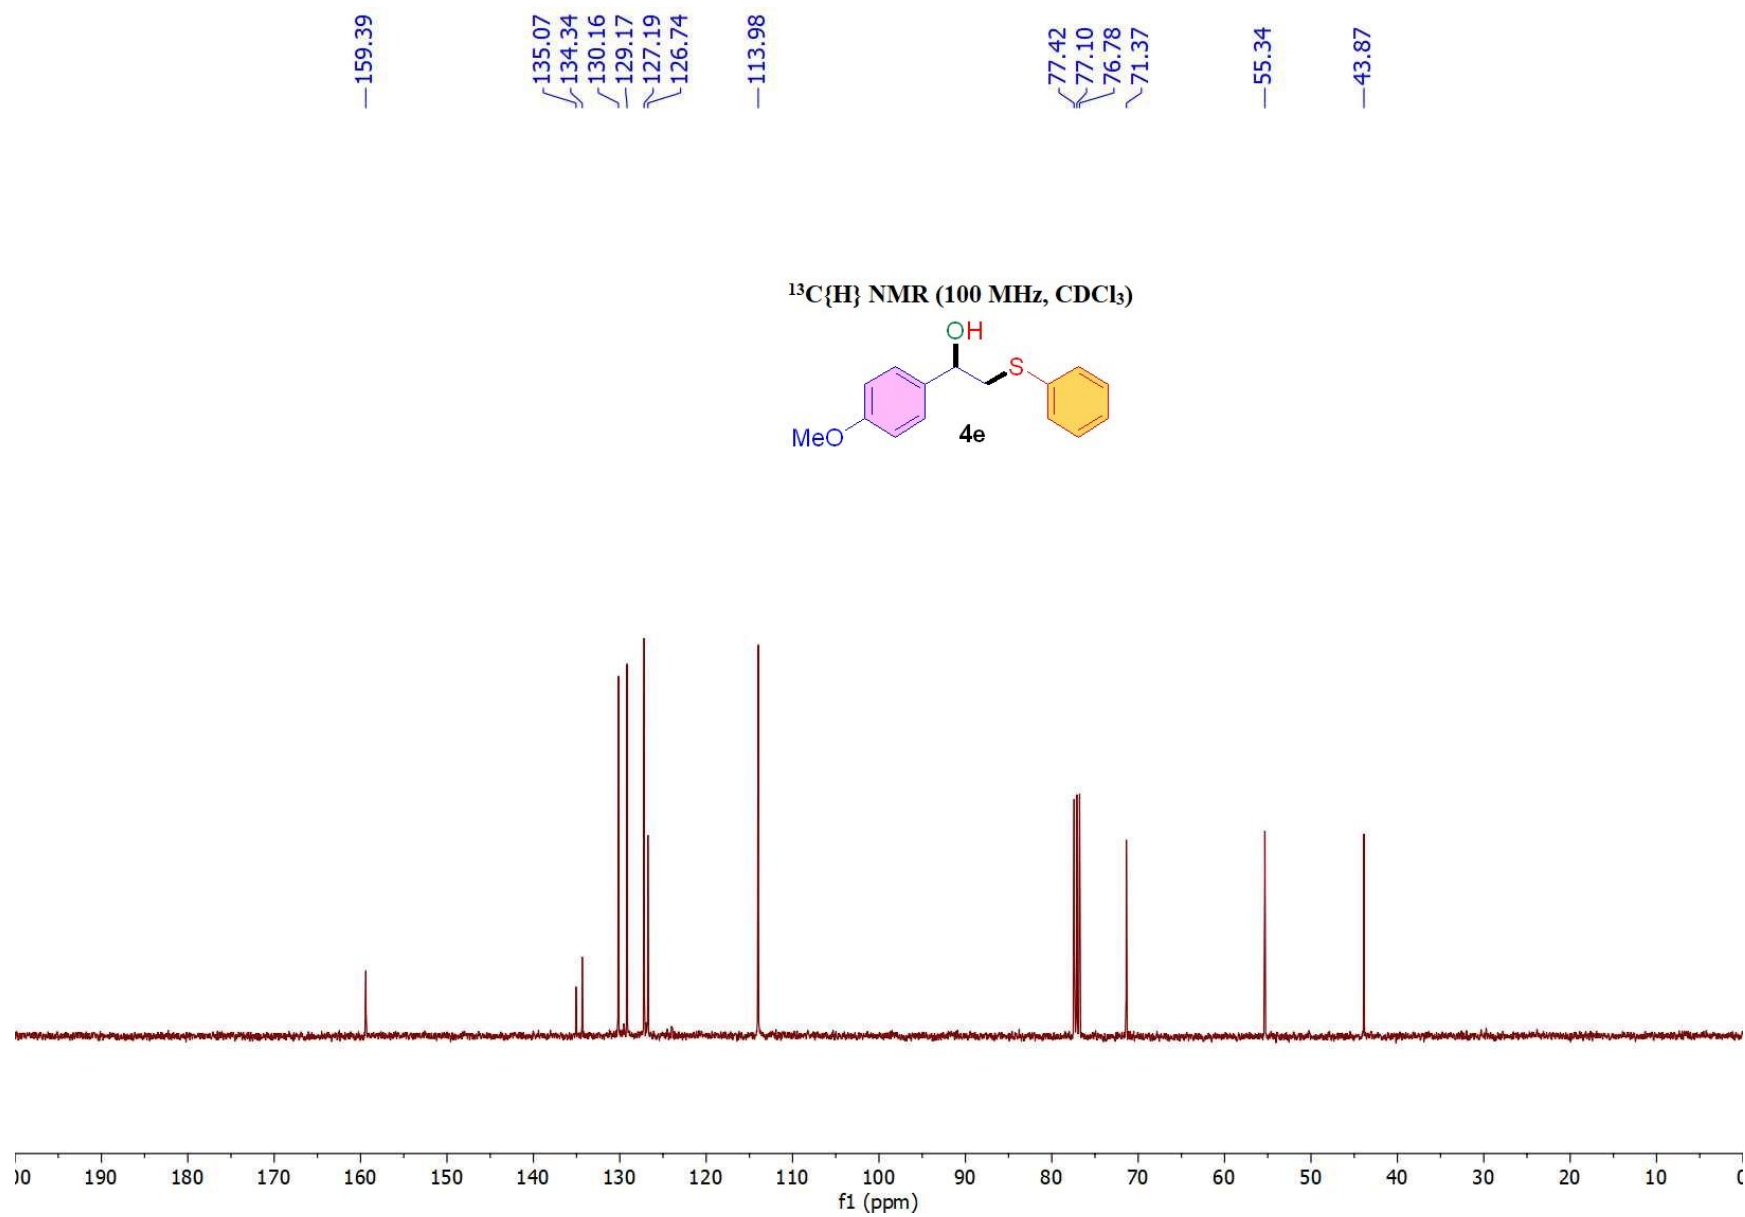

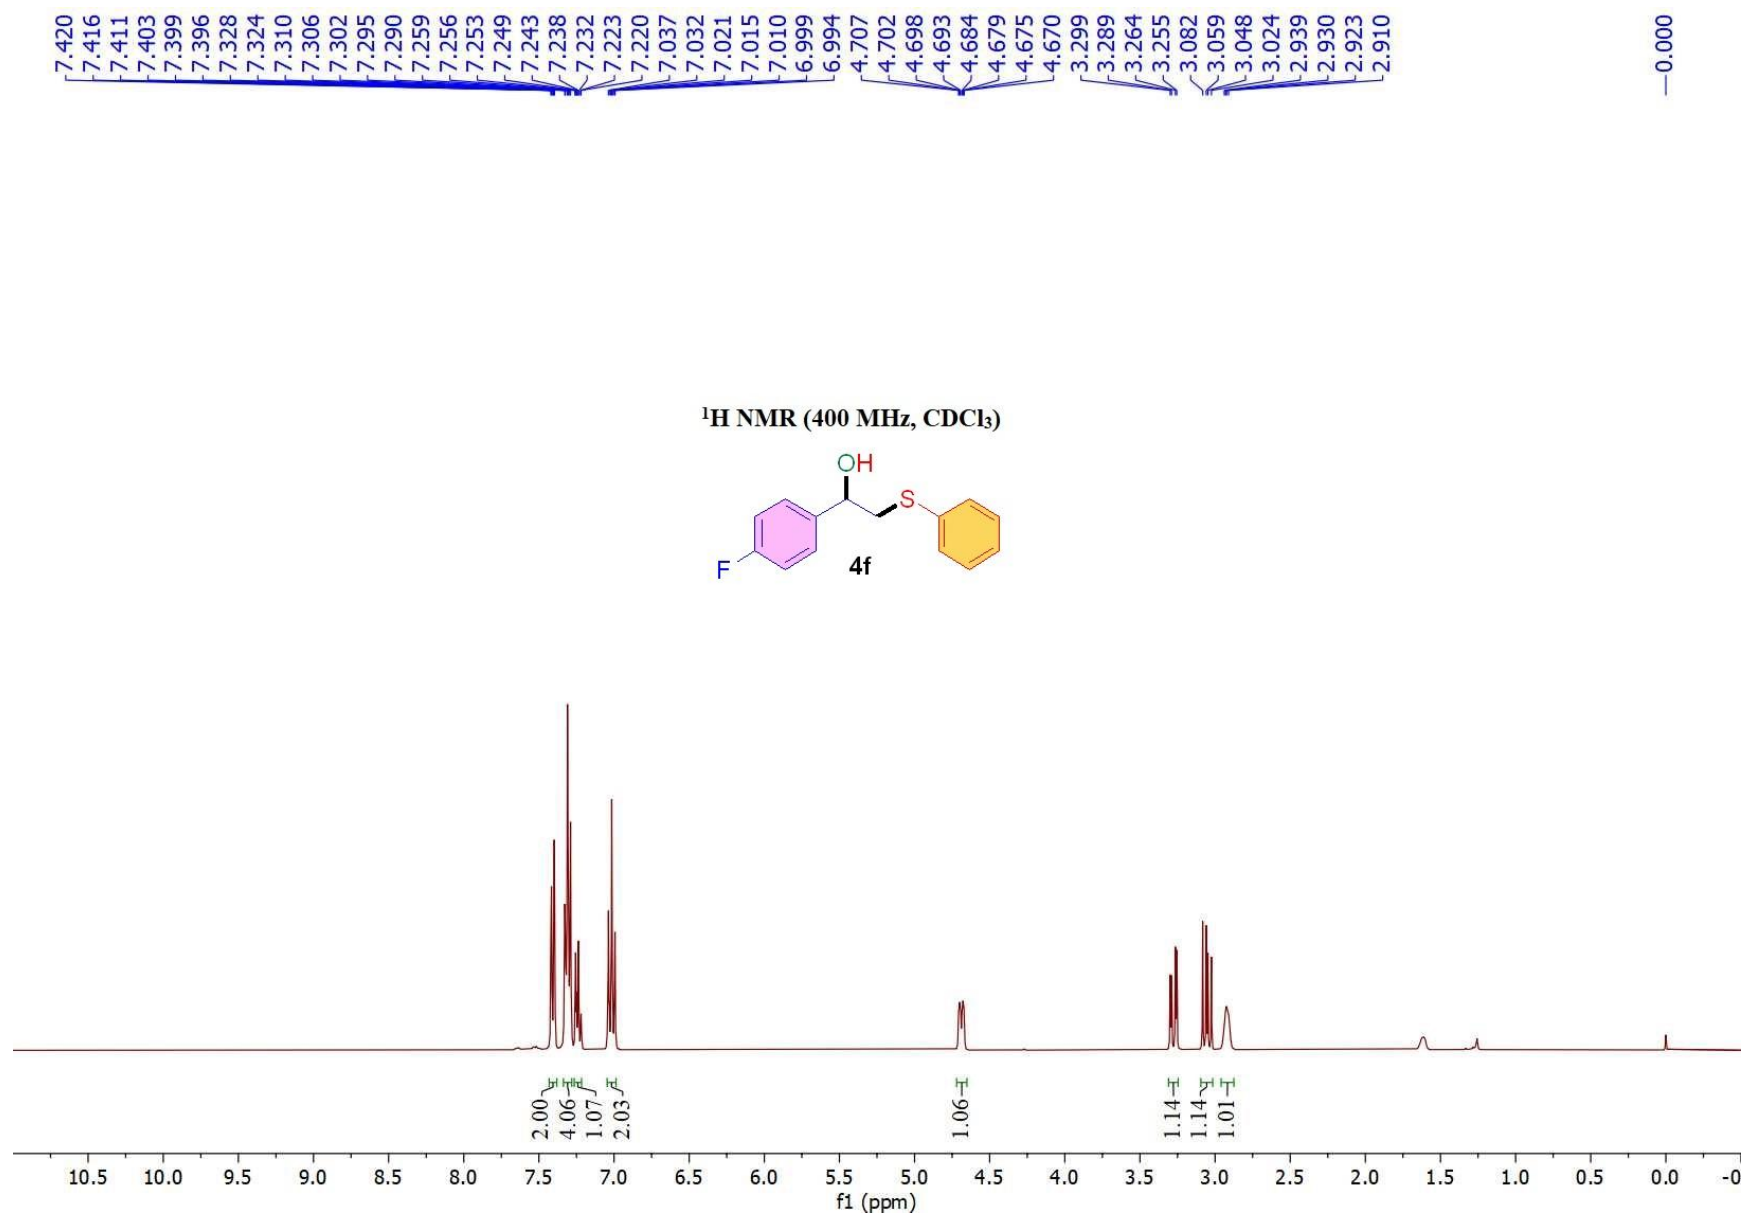

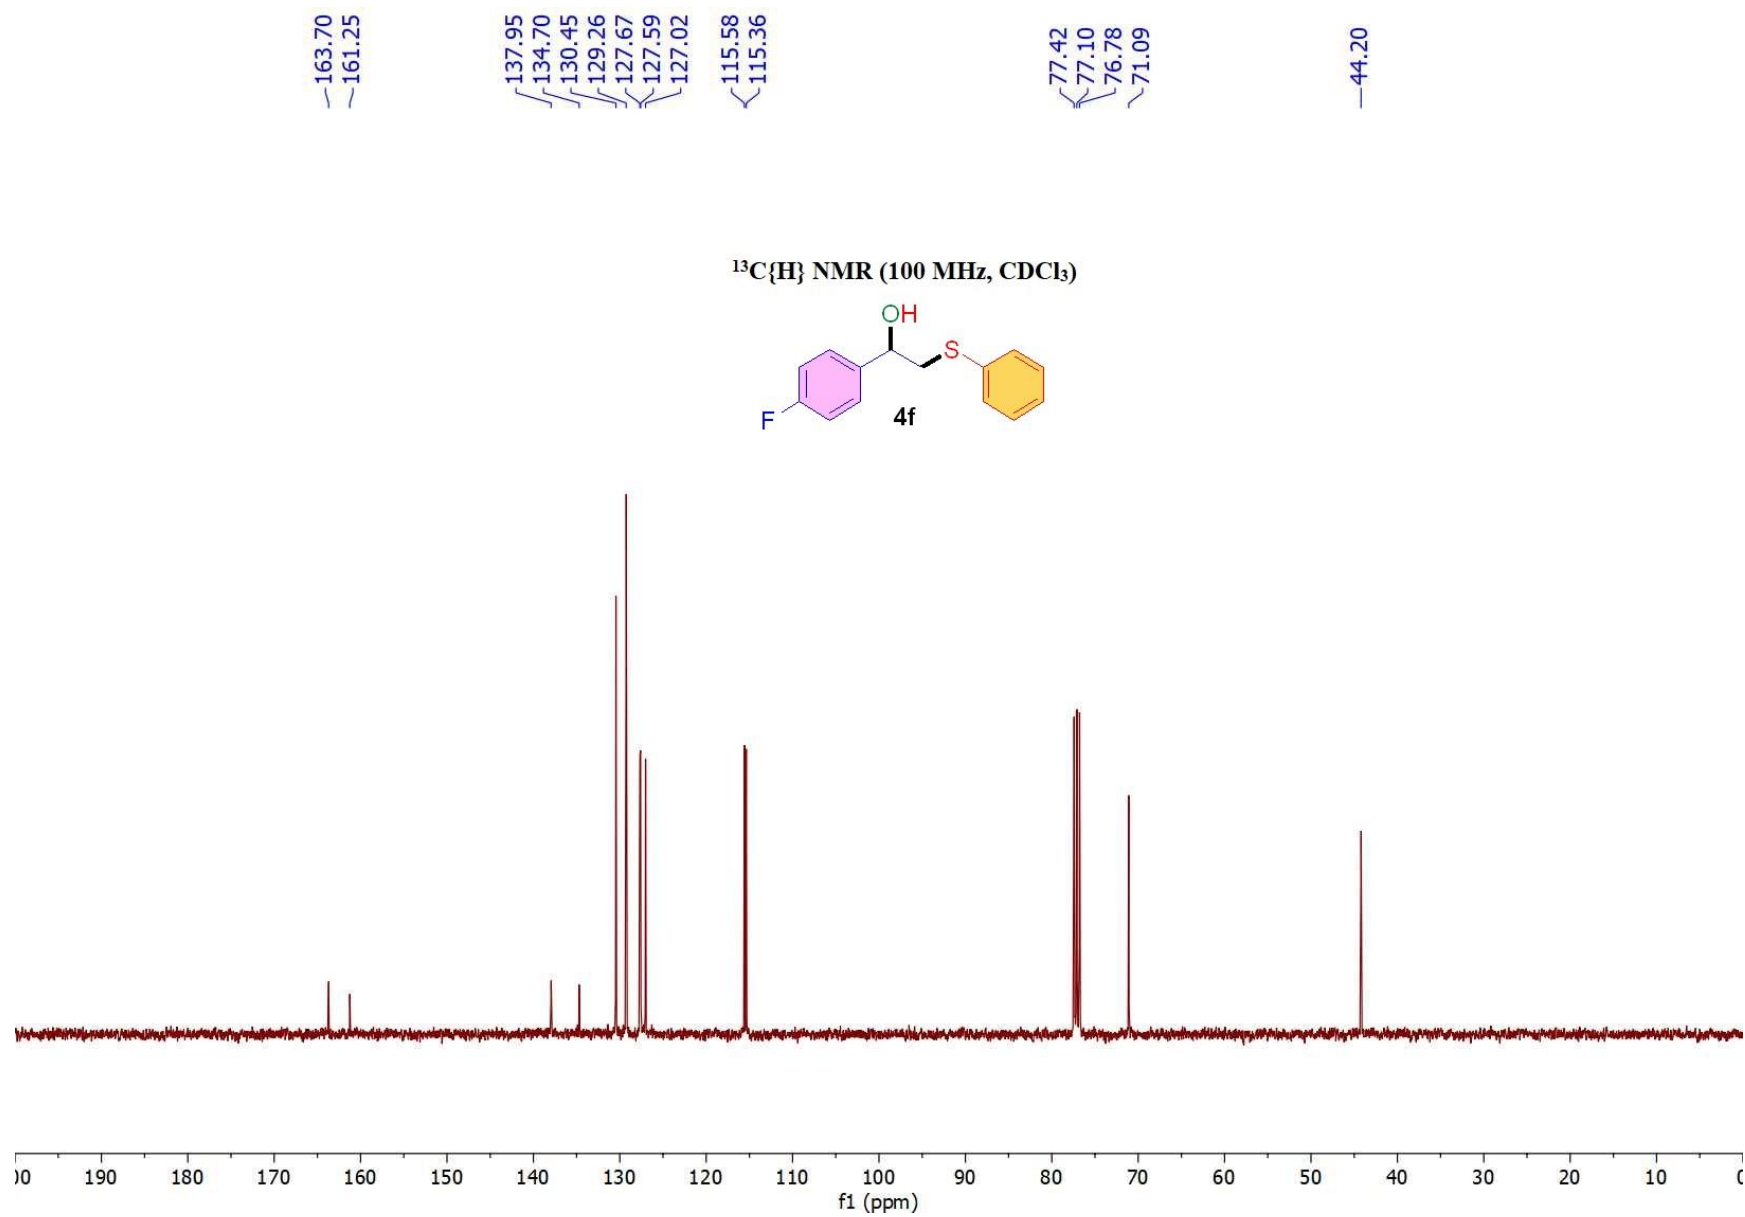

<sup>19</sup>F NMR (376 MHz, CDCl<sub>3</sub>)

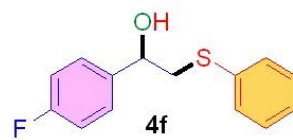

—114.194

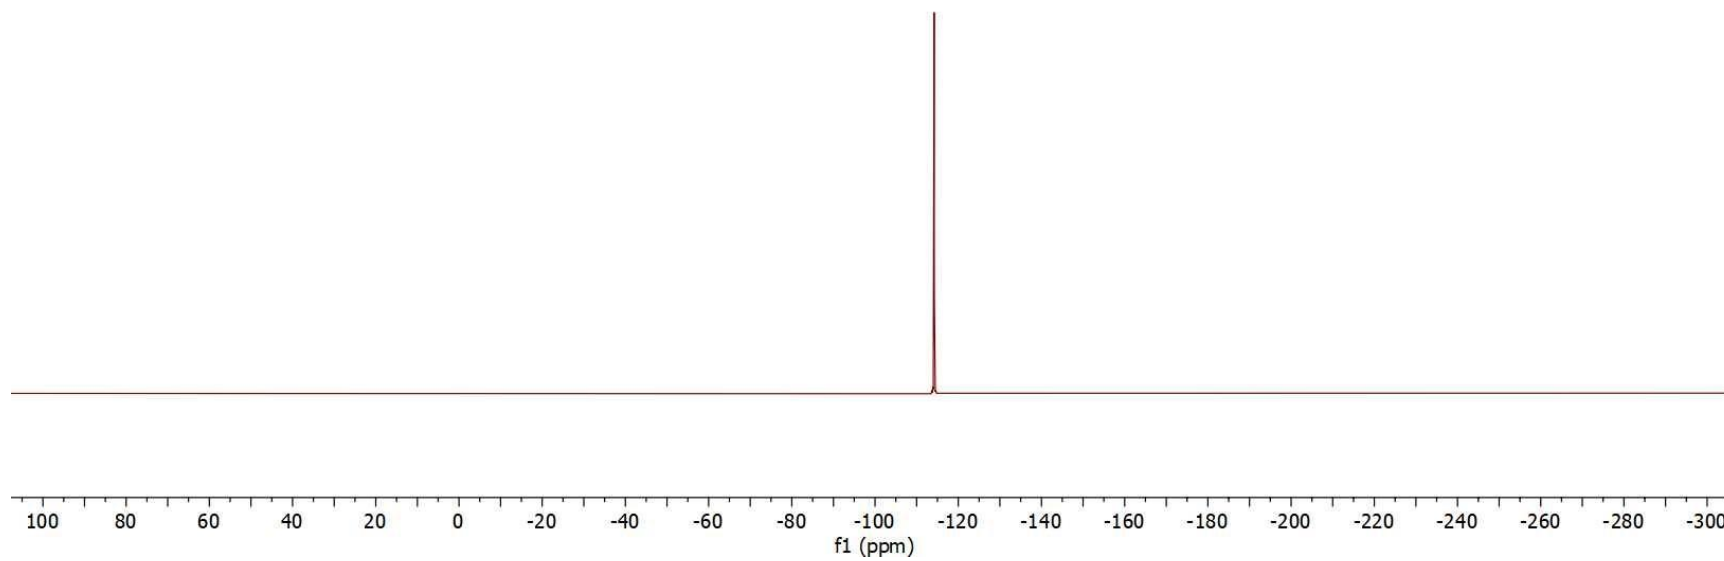

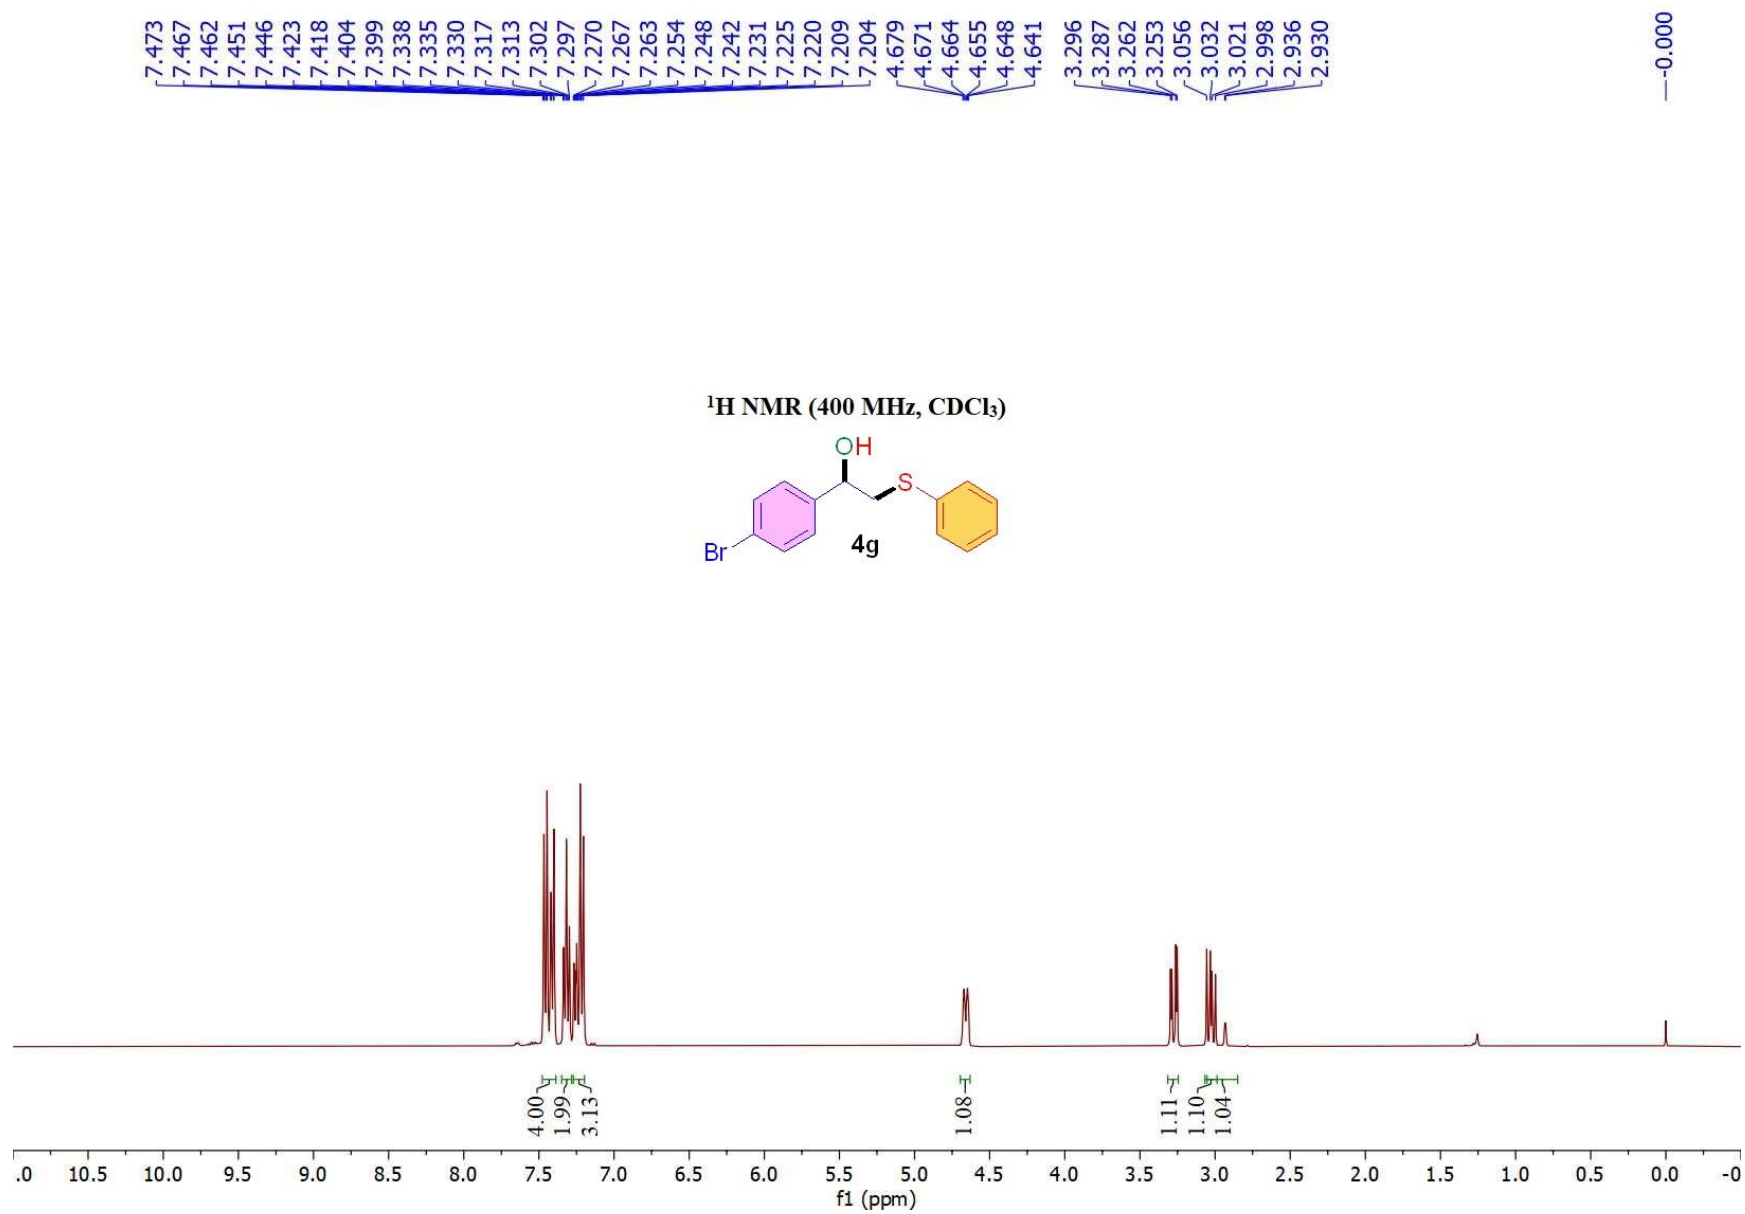

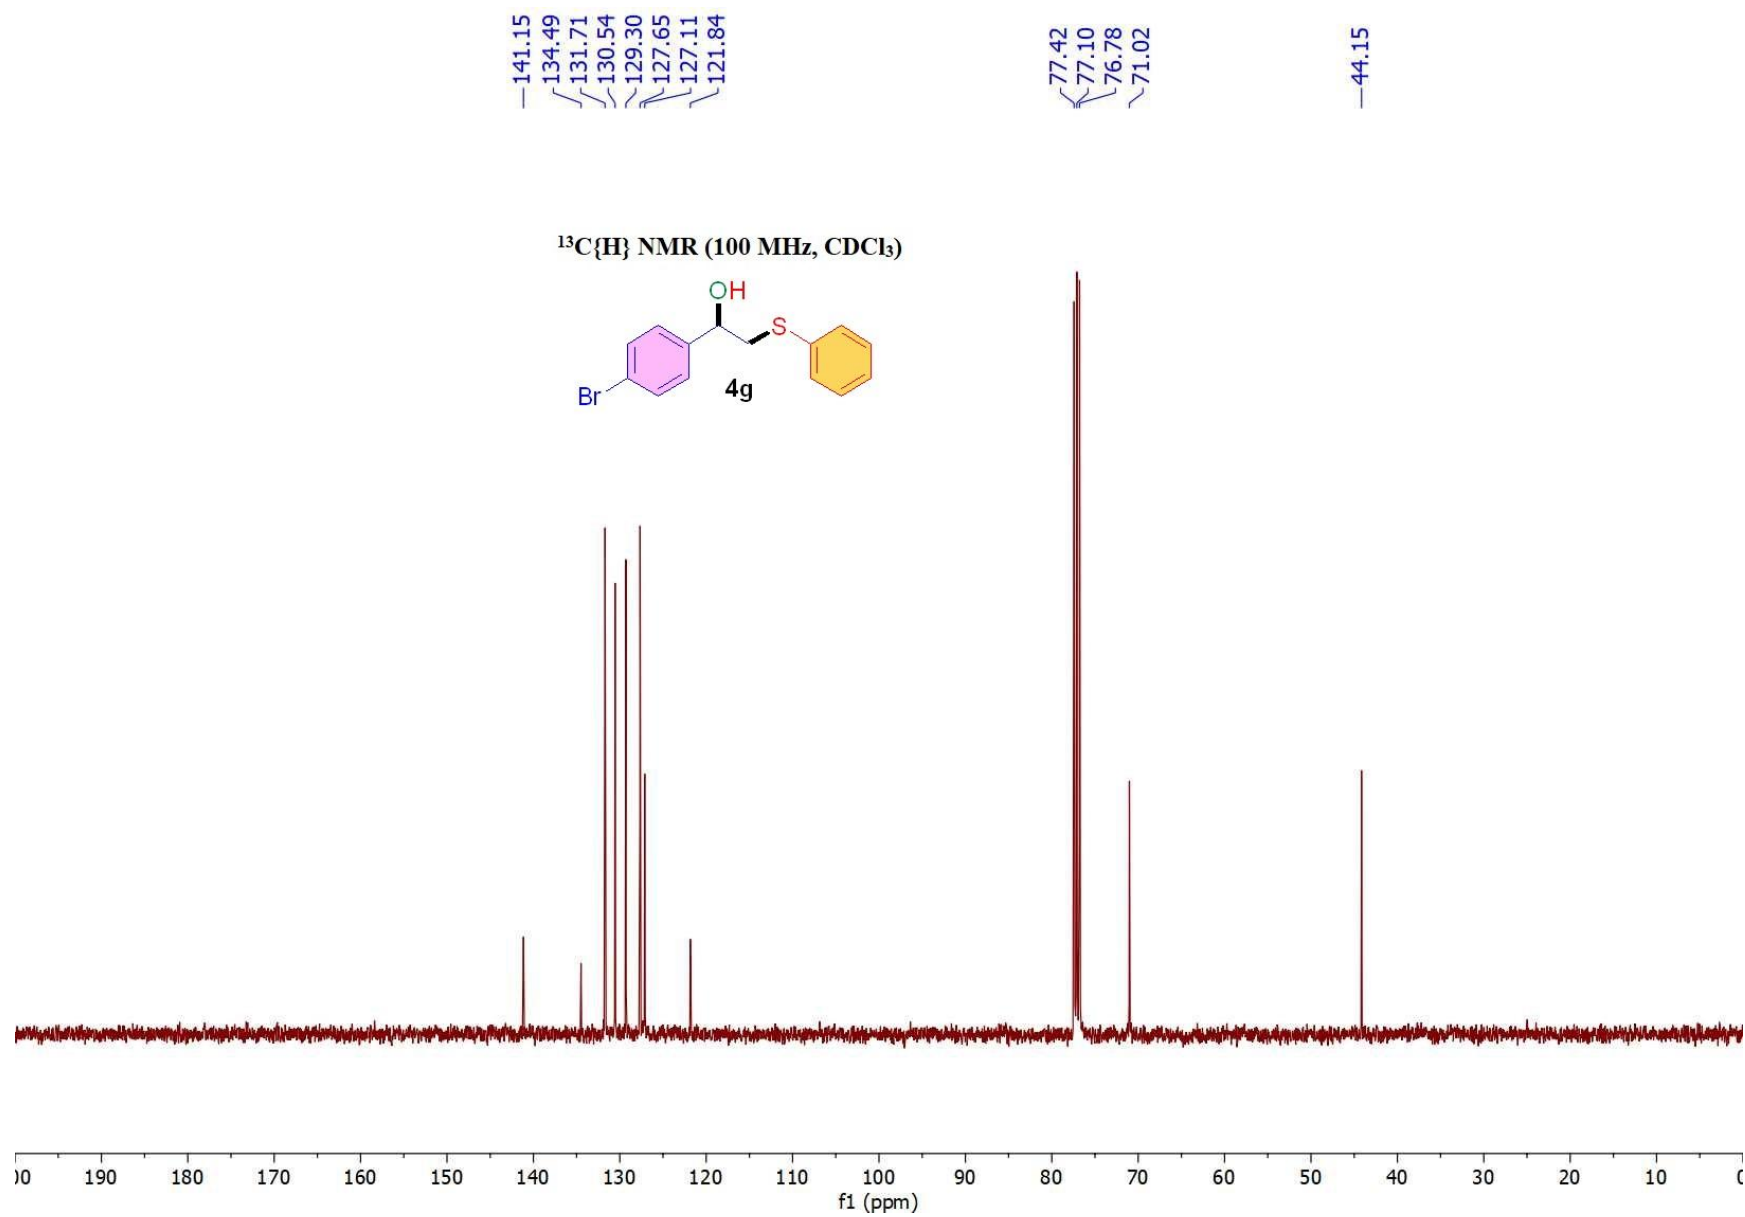

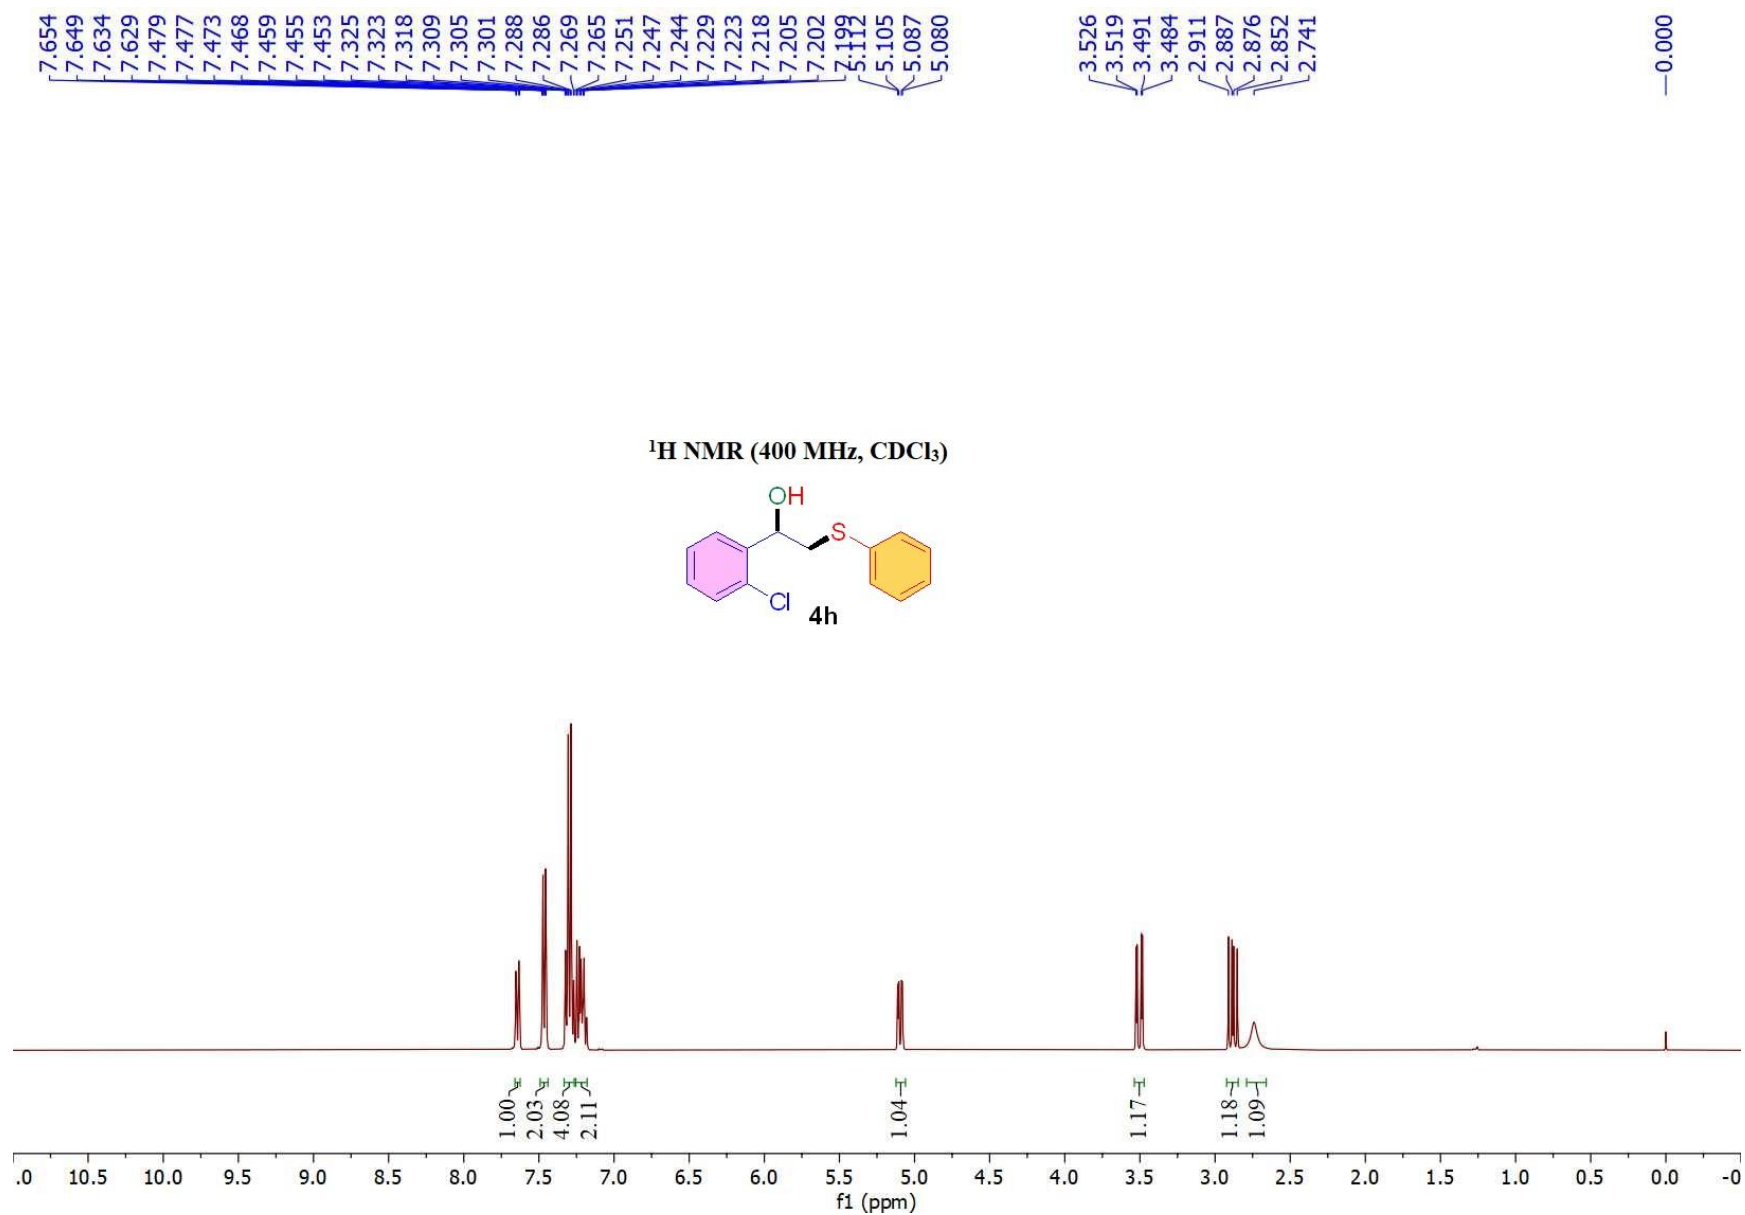

139.54  
134.38  
131.68  
130.40  
129.46  
129.13  
128.94  
127.30  
127.18  
126.95

77.42  
77.10  
76.78  
—68.19

—42.19

$^{13}\text{C}\{\text{H}\}$  NMR (100 MHz,  $\text{CDCl}_3$ )

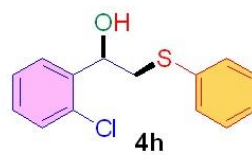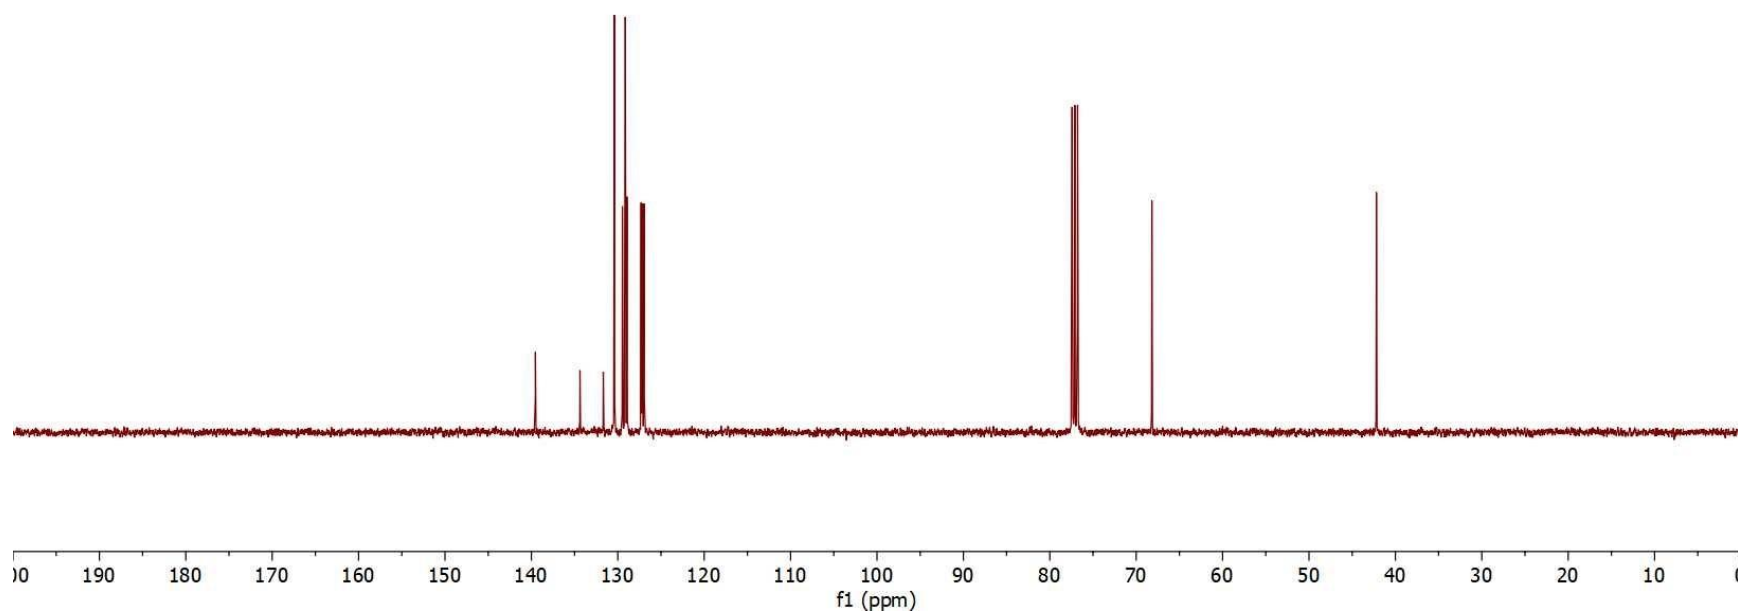

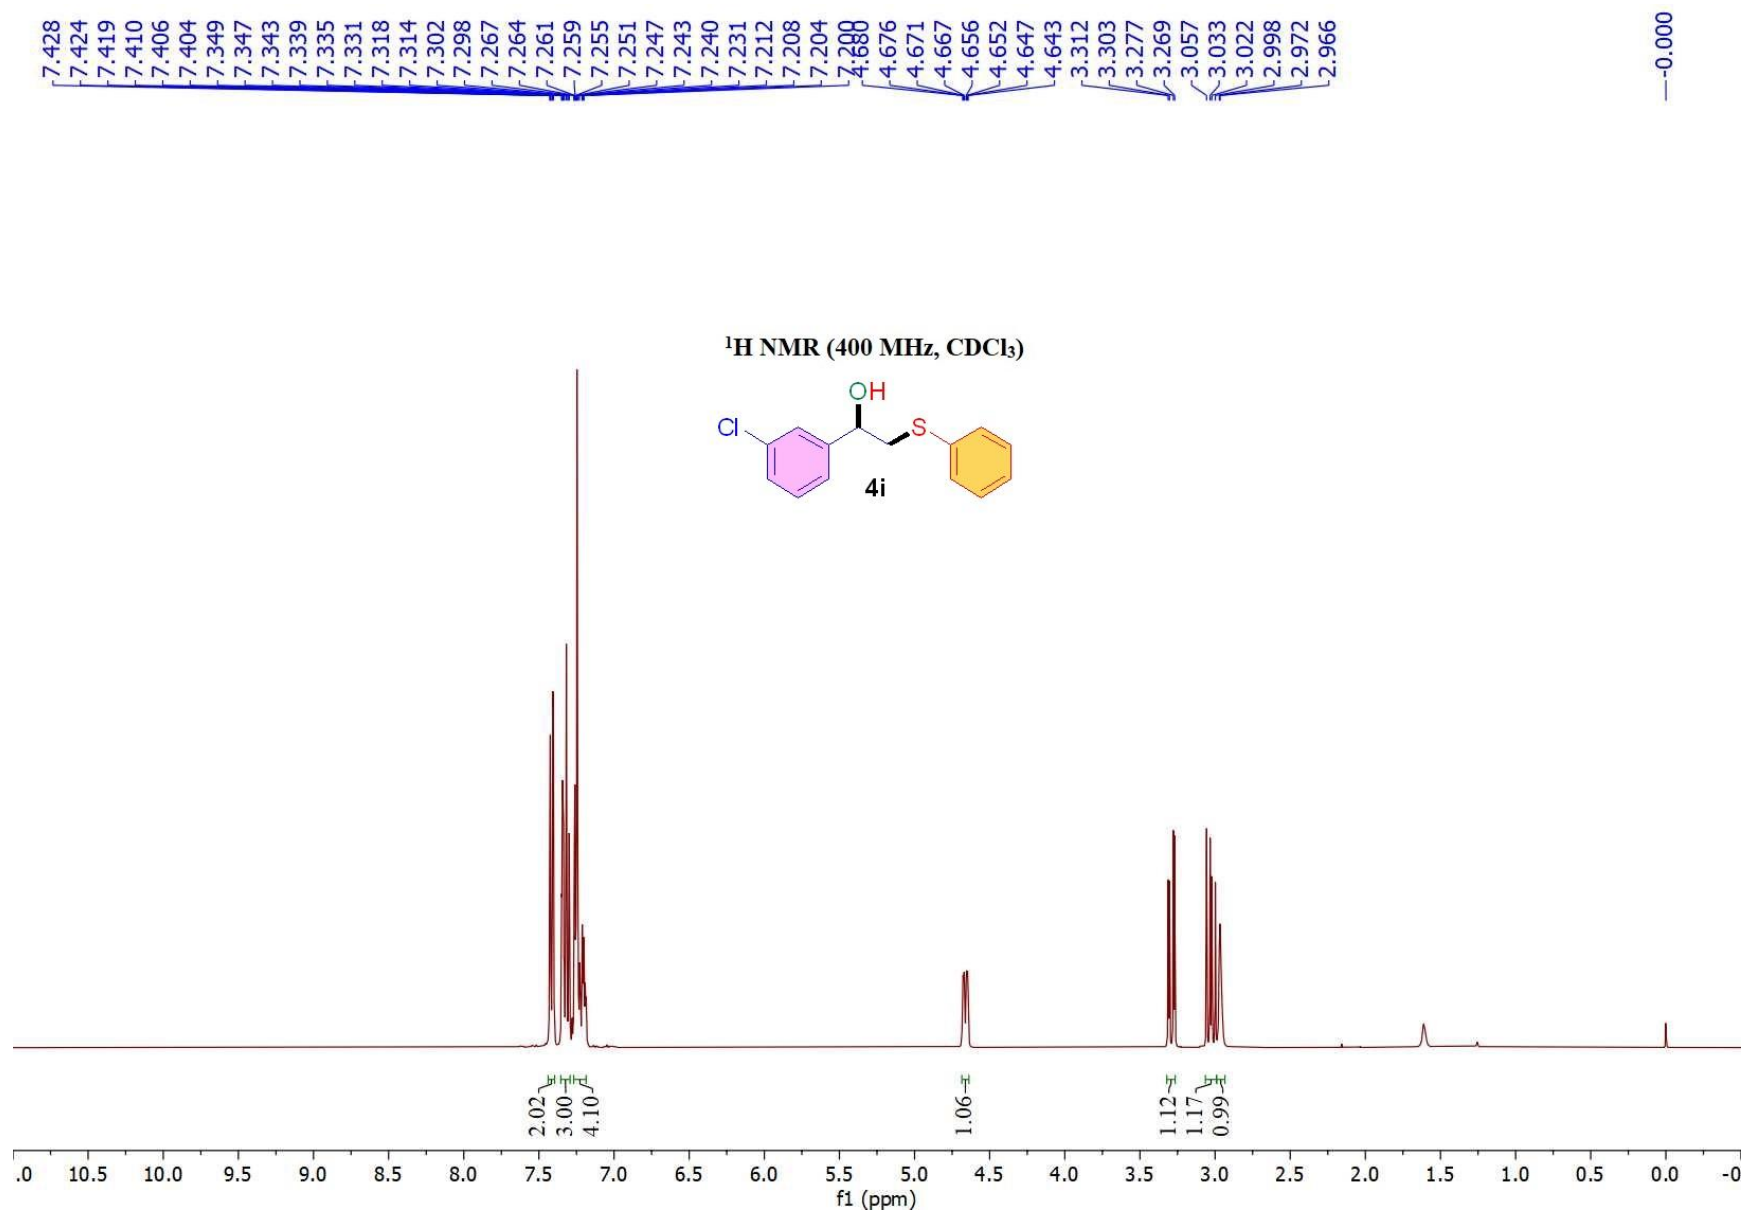

144.23  
134.55  
134.47  
130.59  
129.89  
129.30  
128.15  
127.15  
126.15  
124.08

77.42  
77.10  
76.78  
71.04

44.20

$^{13}\text{C}\{\text{H}\}$  NMR (100 MHz,  $\text{CDCl}_3$ )

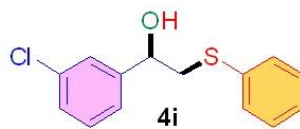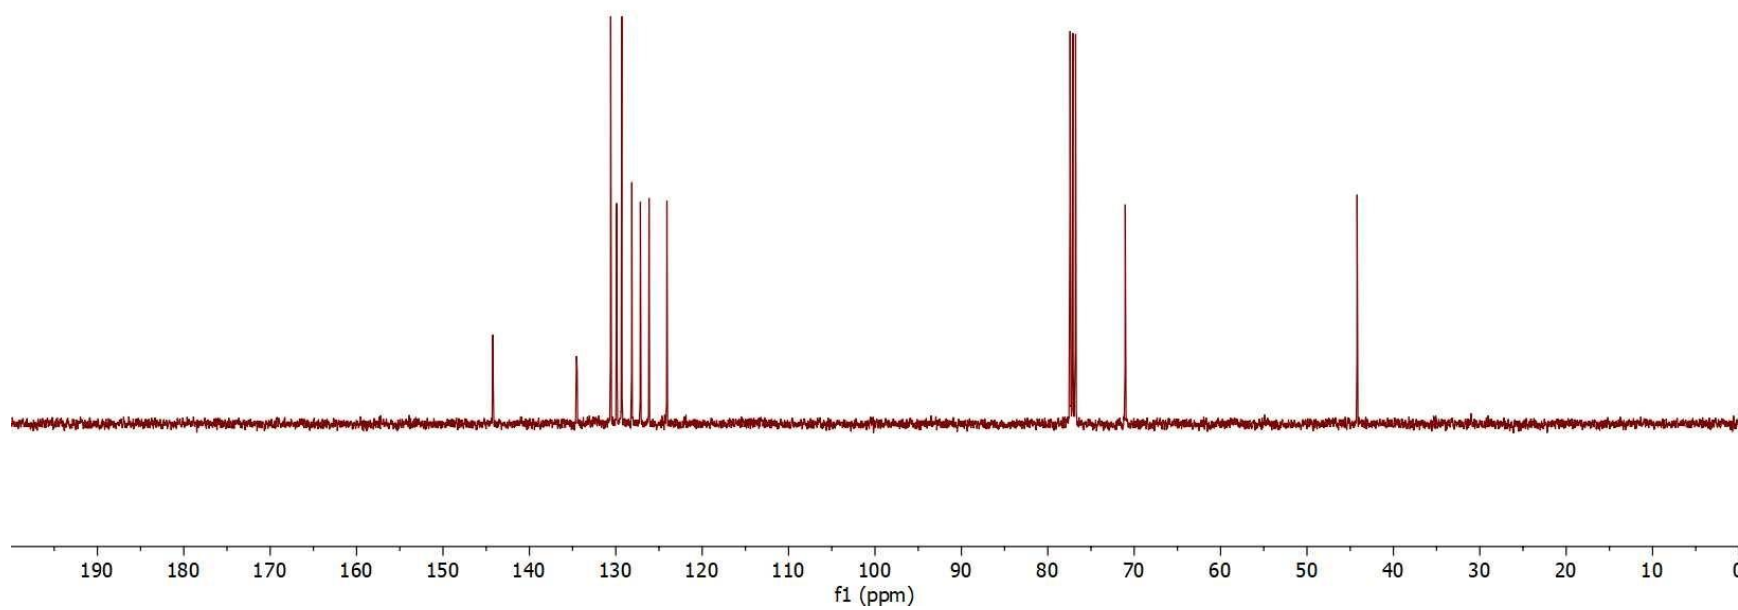

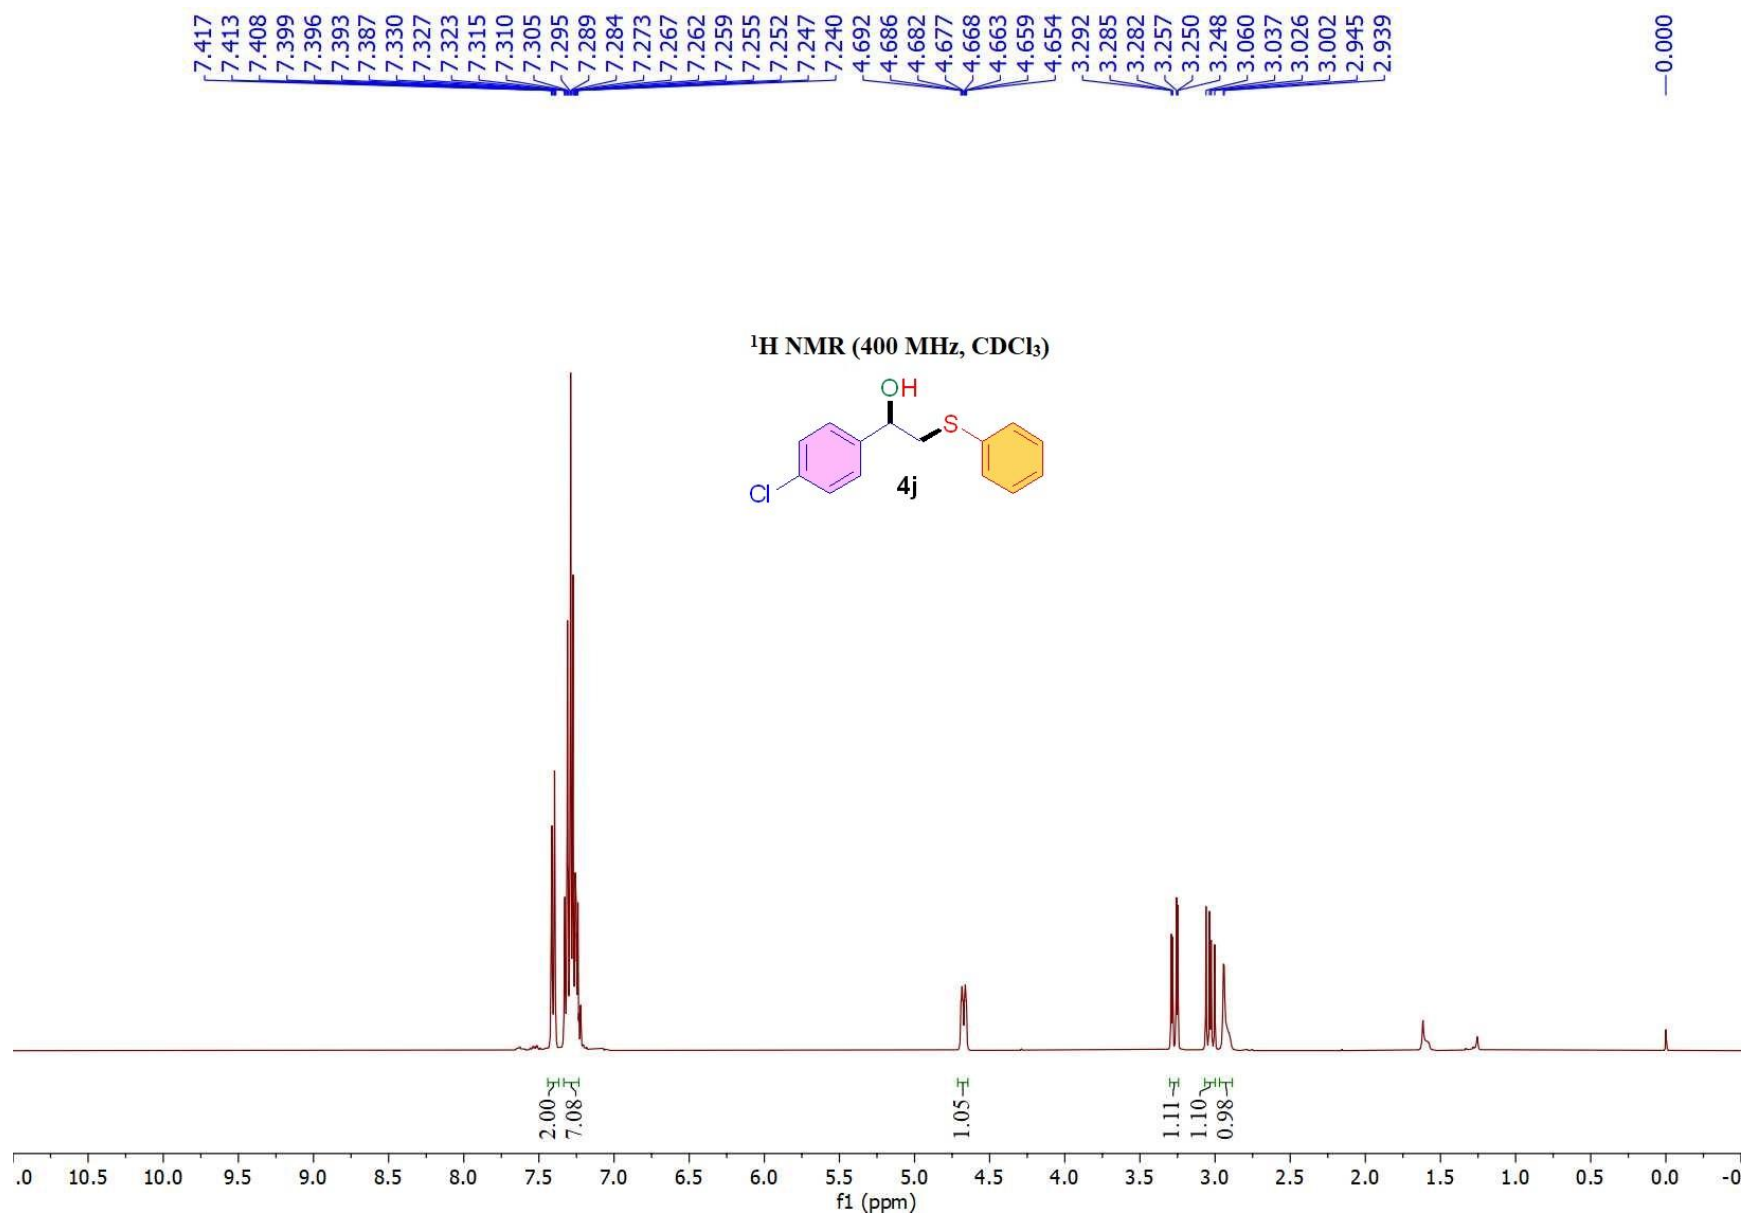

140.66  
134.58  
133.71  
130.52  
129.28  
128.76  
127.32  
127.08

77.42  
77.10  
76.78  
71.03

44.17

$^{13}\text{C}\{\text{H}\}$  NMR (100 MHz,  $\text{CDCl}_3$ )

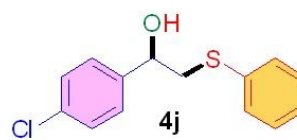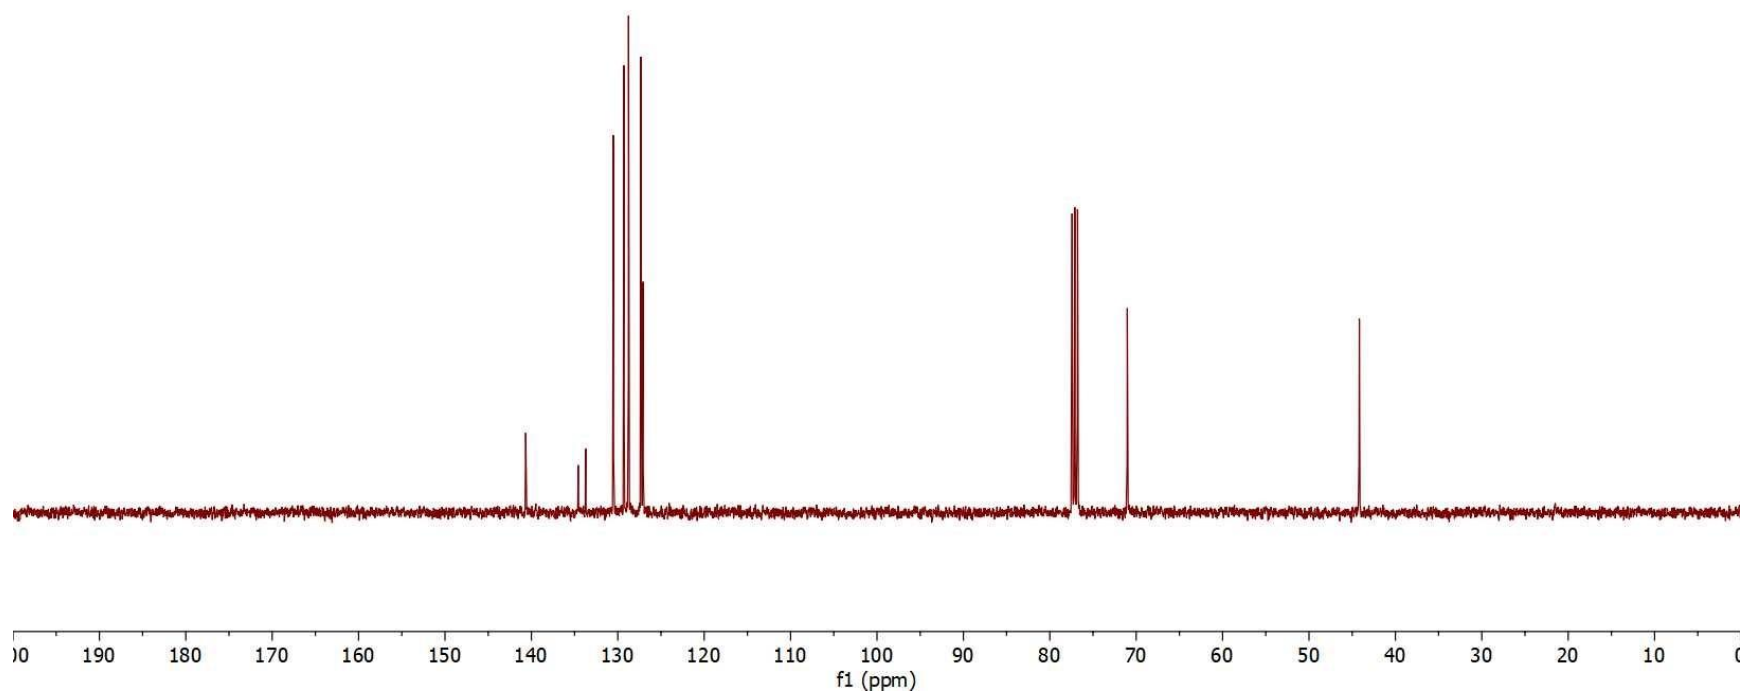

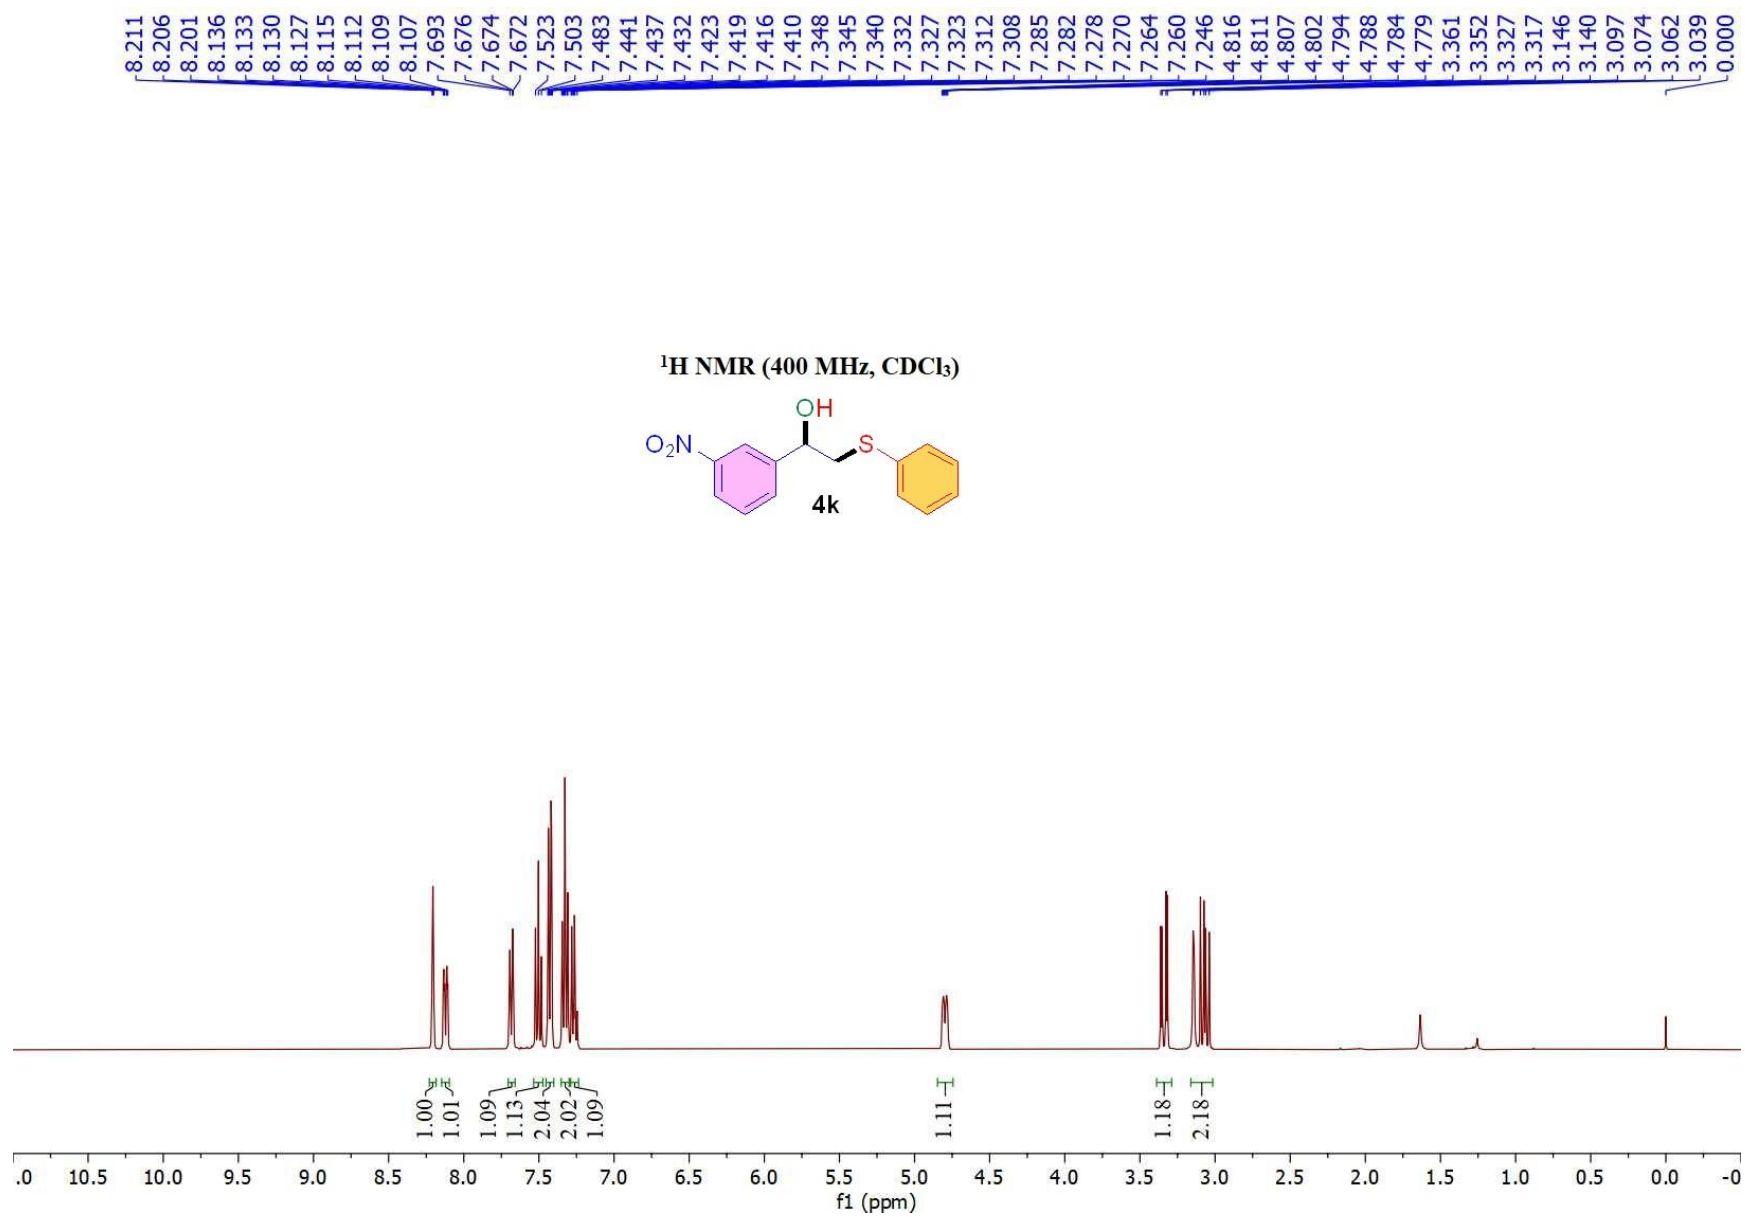

—148.37  
 —144.25  
 133.92  
 132.09  
 130.89  
 129.54  
 129.40  
 127.44  
 122.93  
 121.10

77.42  
 77.10  
 76.78  
 70.63

—44.26

$^{13}\text{C}\{^1\text{H}\}$  NMR (100 MHz,  $\text{CDCl}_3$ )

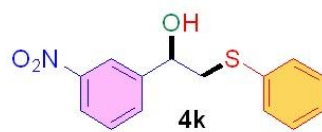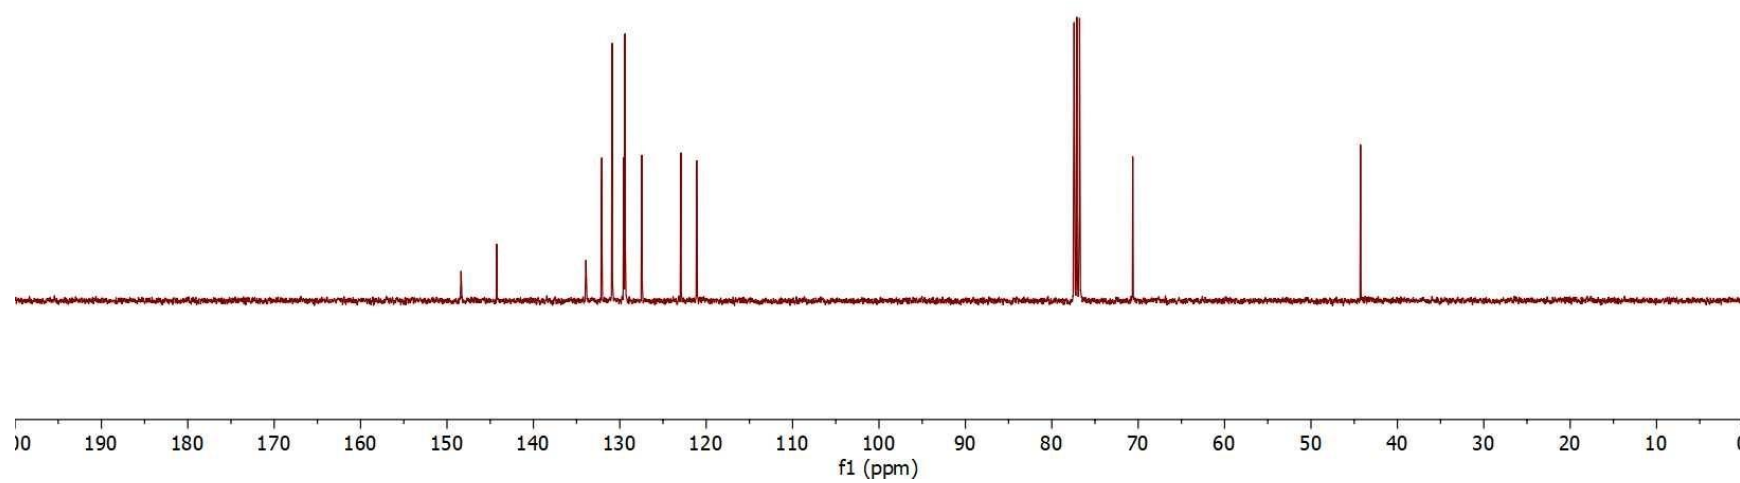

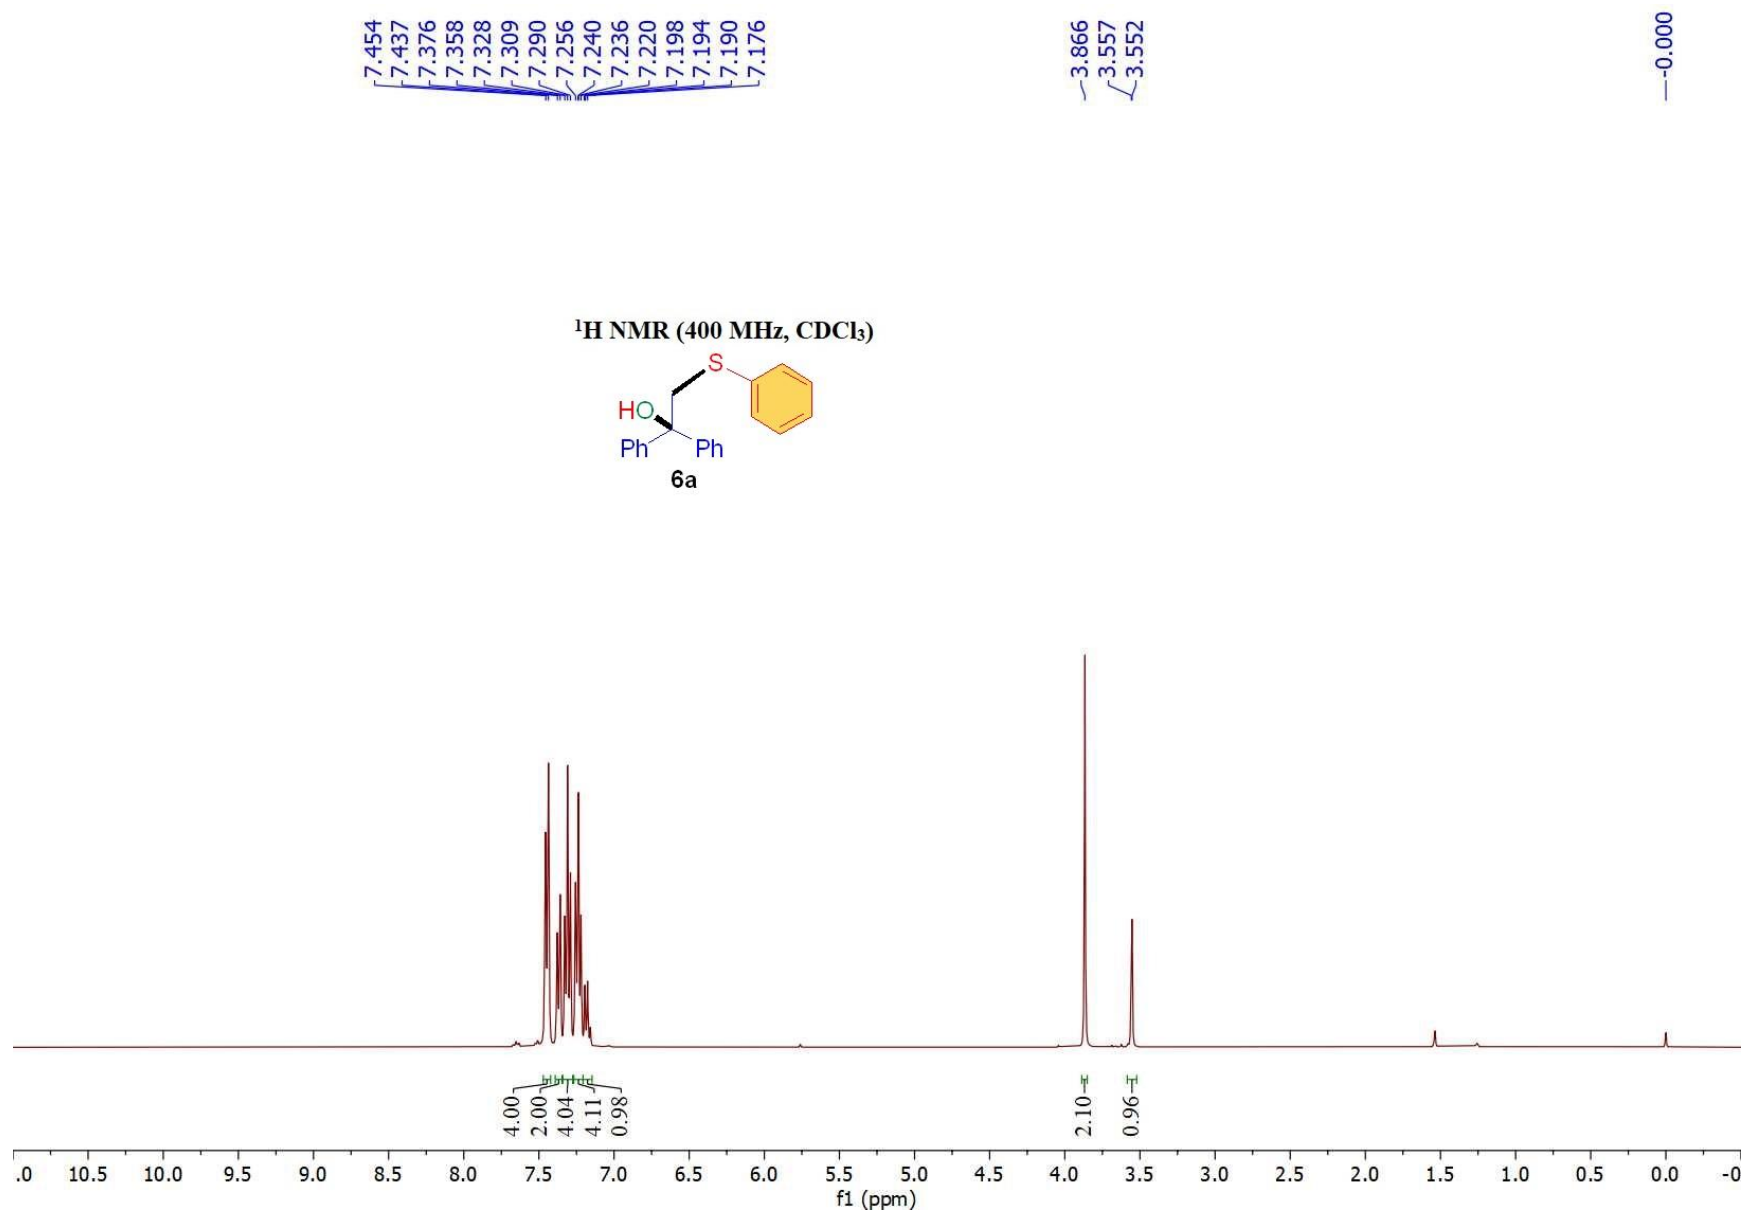

—145.22  
 136.57  
 130.35  
 129.10  
 128.36  
 127.45  
 126.73  
 126.23

77.75  
 77.42  
 77.10  
 76.78

—49.09

$^{13}\text{C}\{\text{H}\}$  NMR (100 MHz,  $\text{CDCl}_3$ )

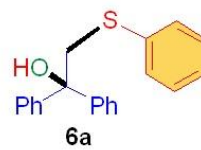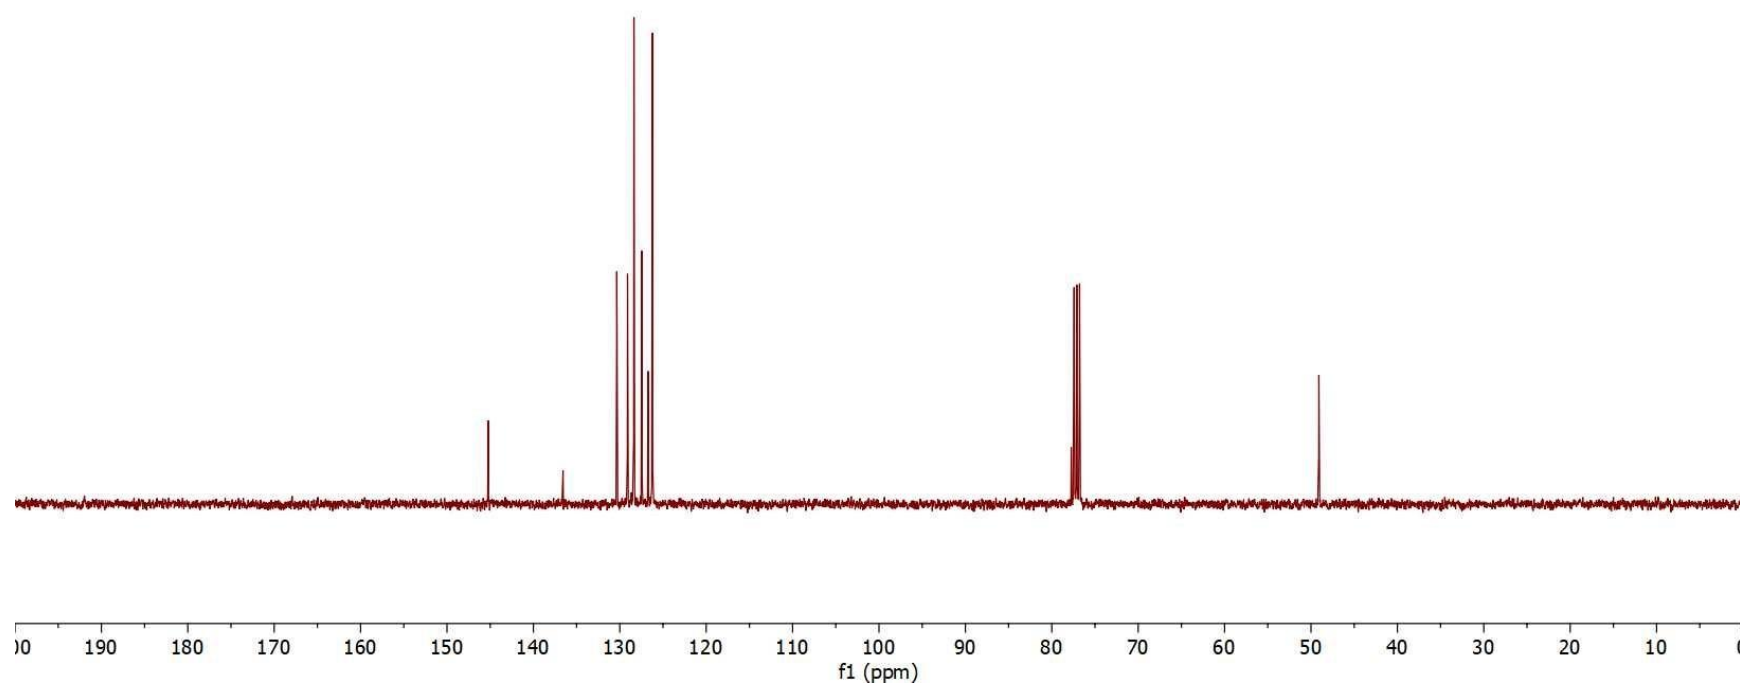

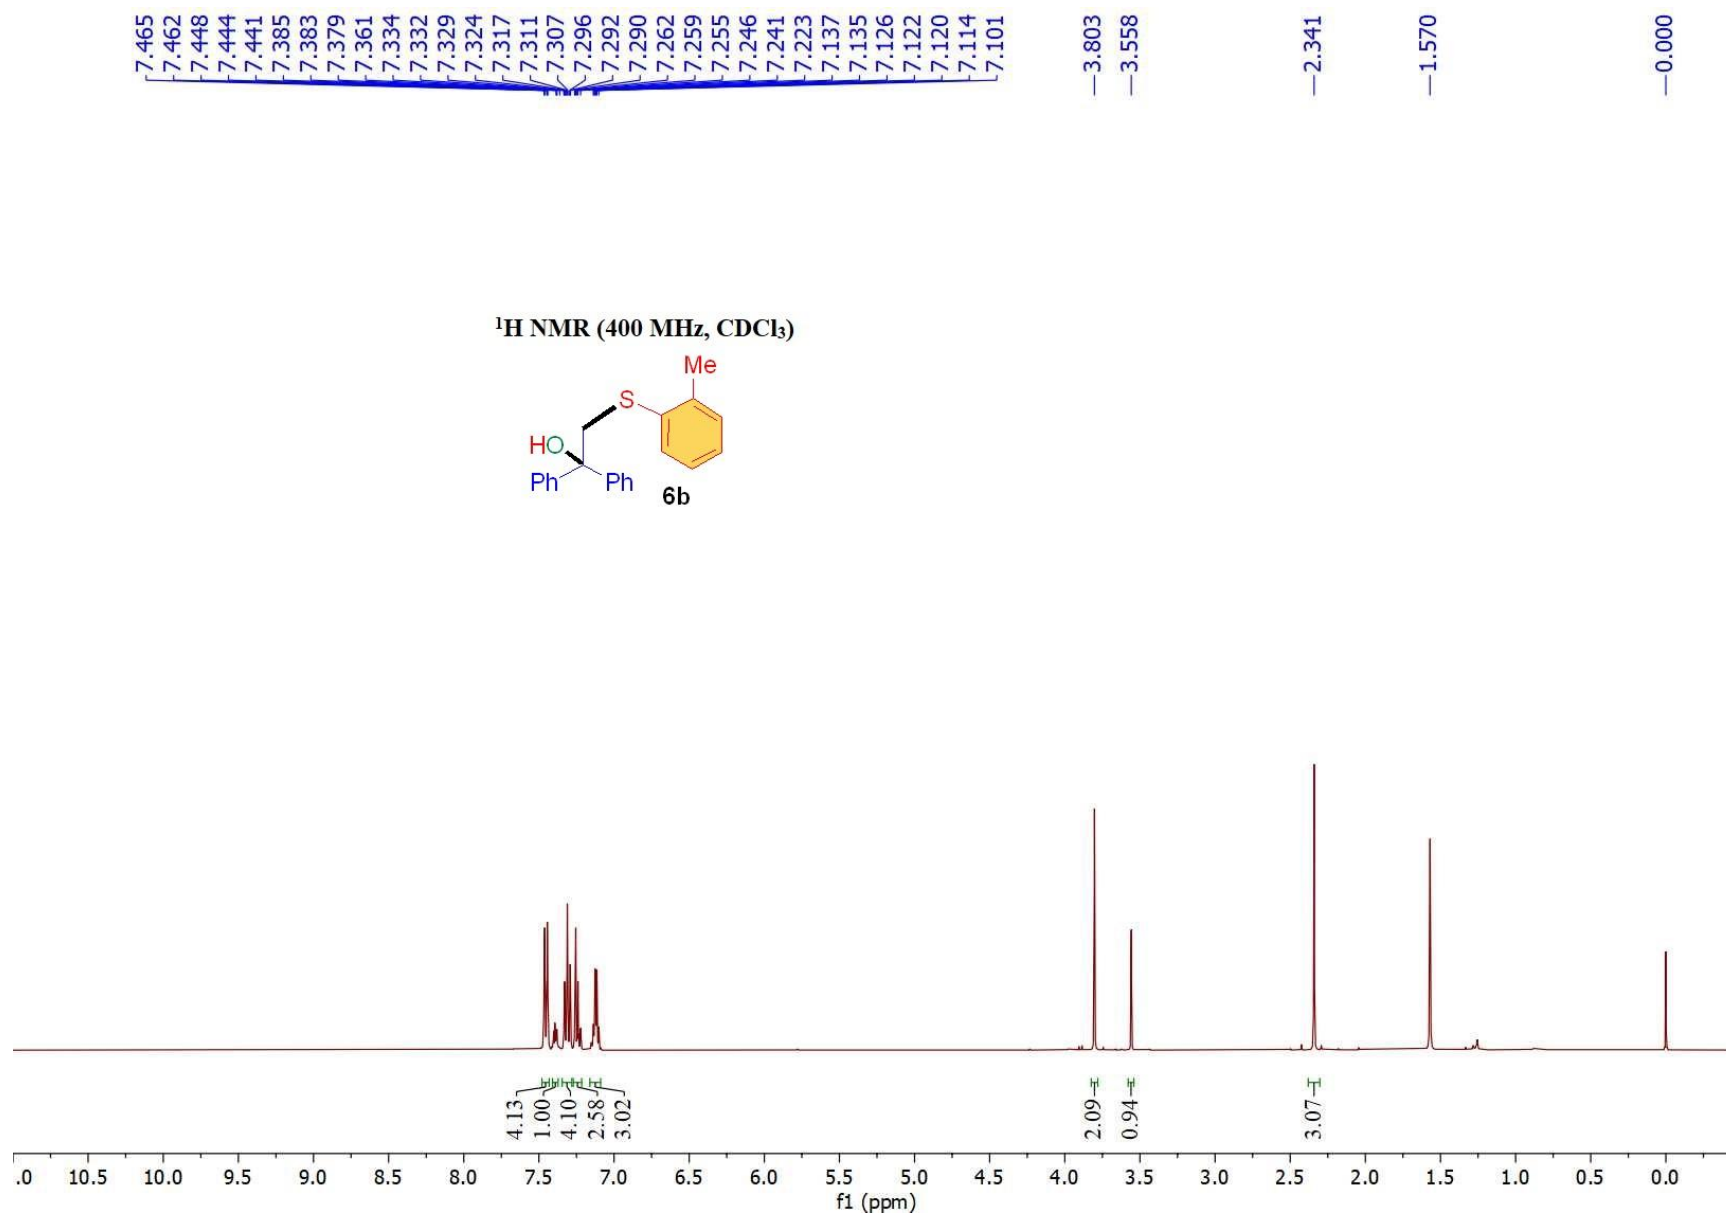

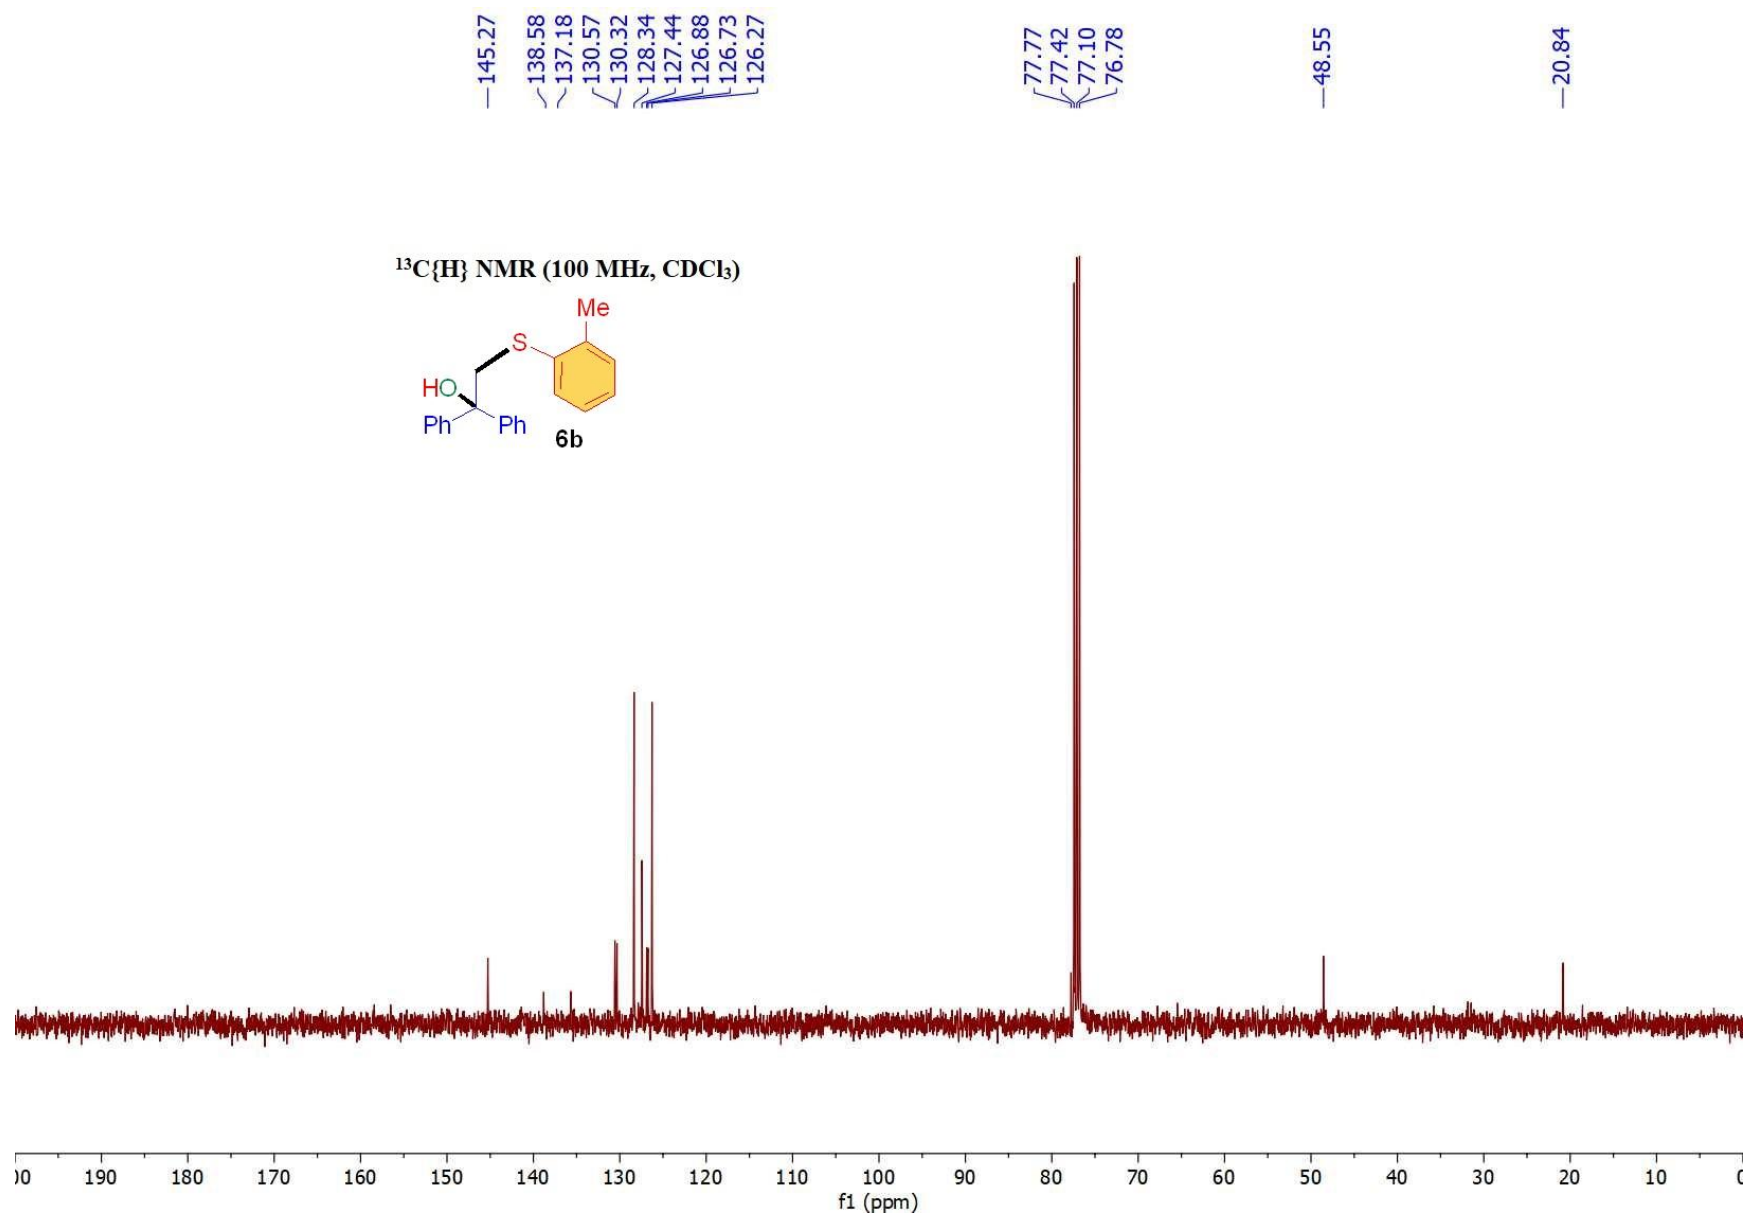

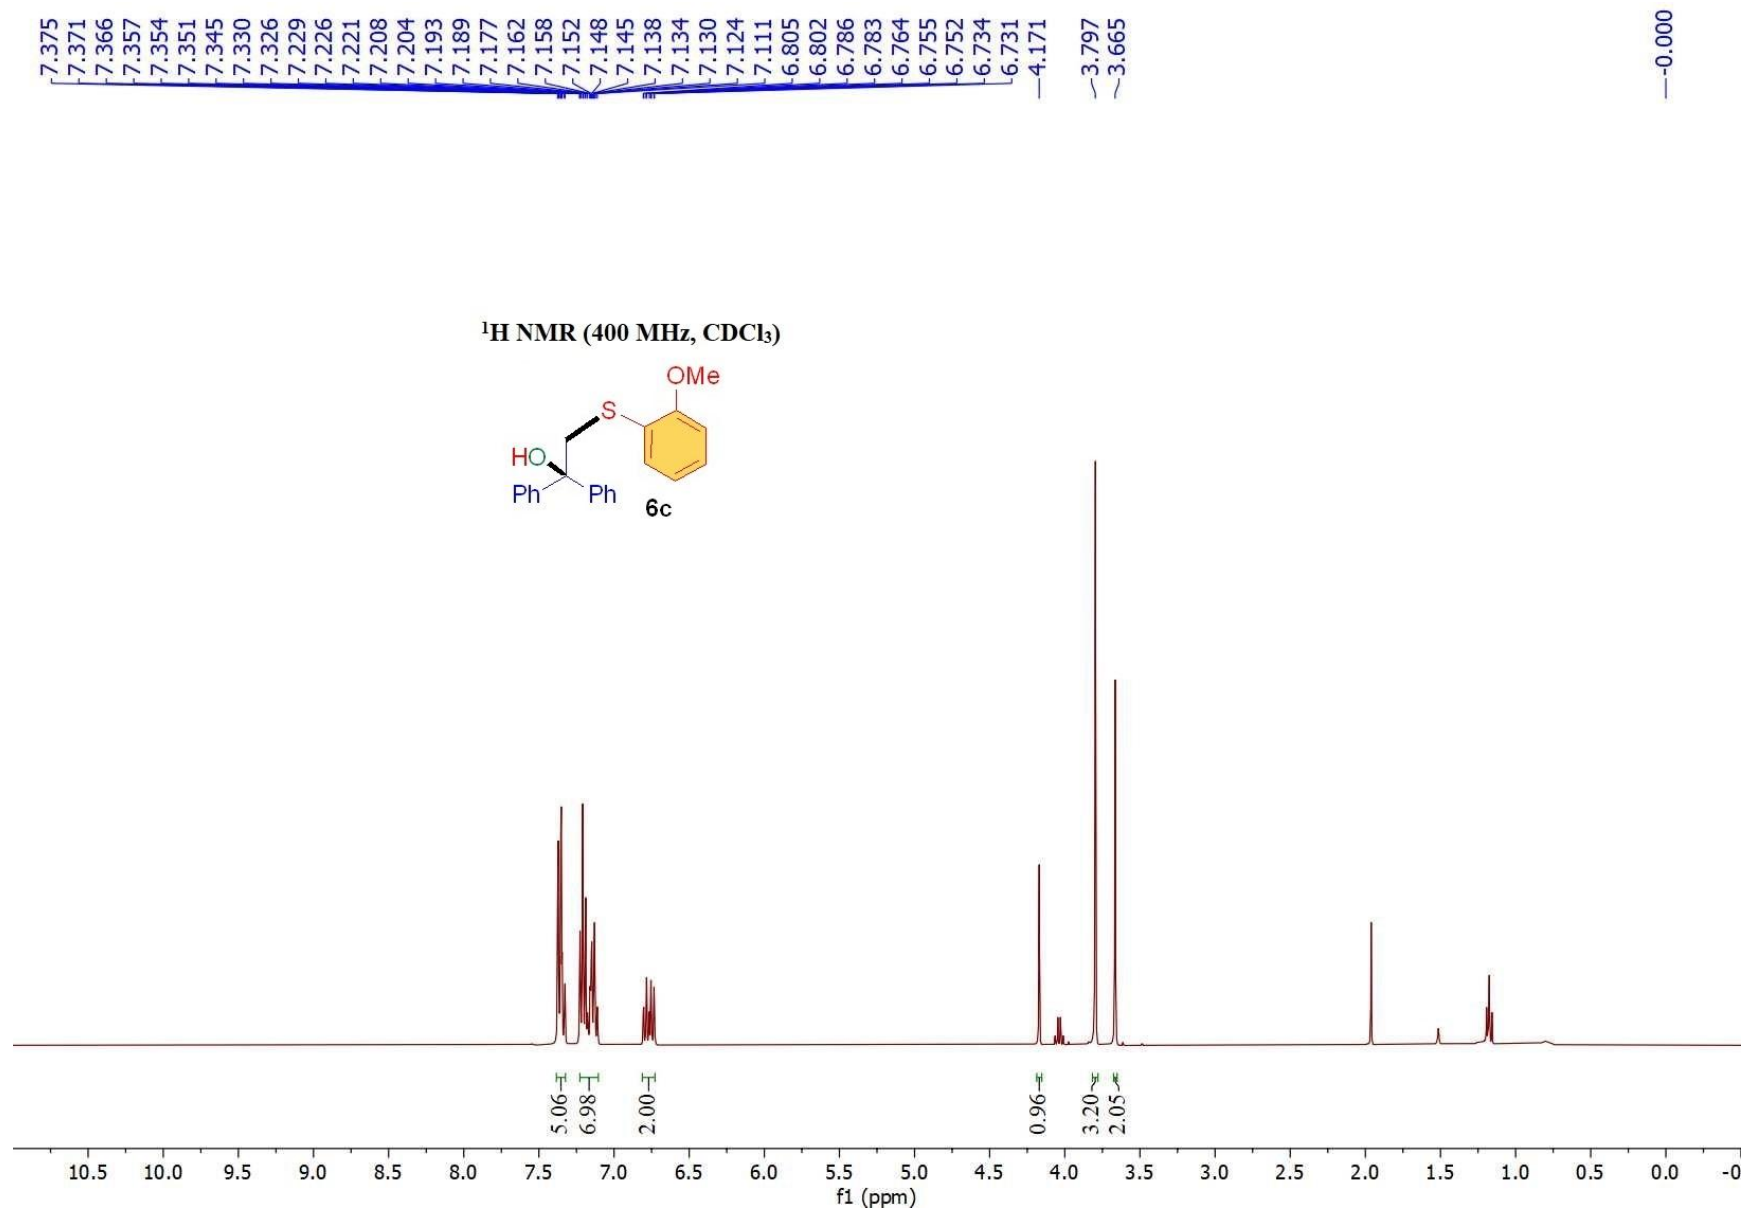

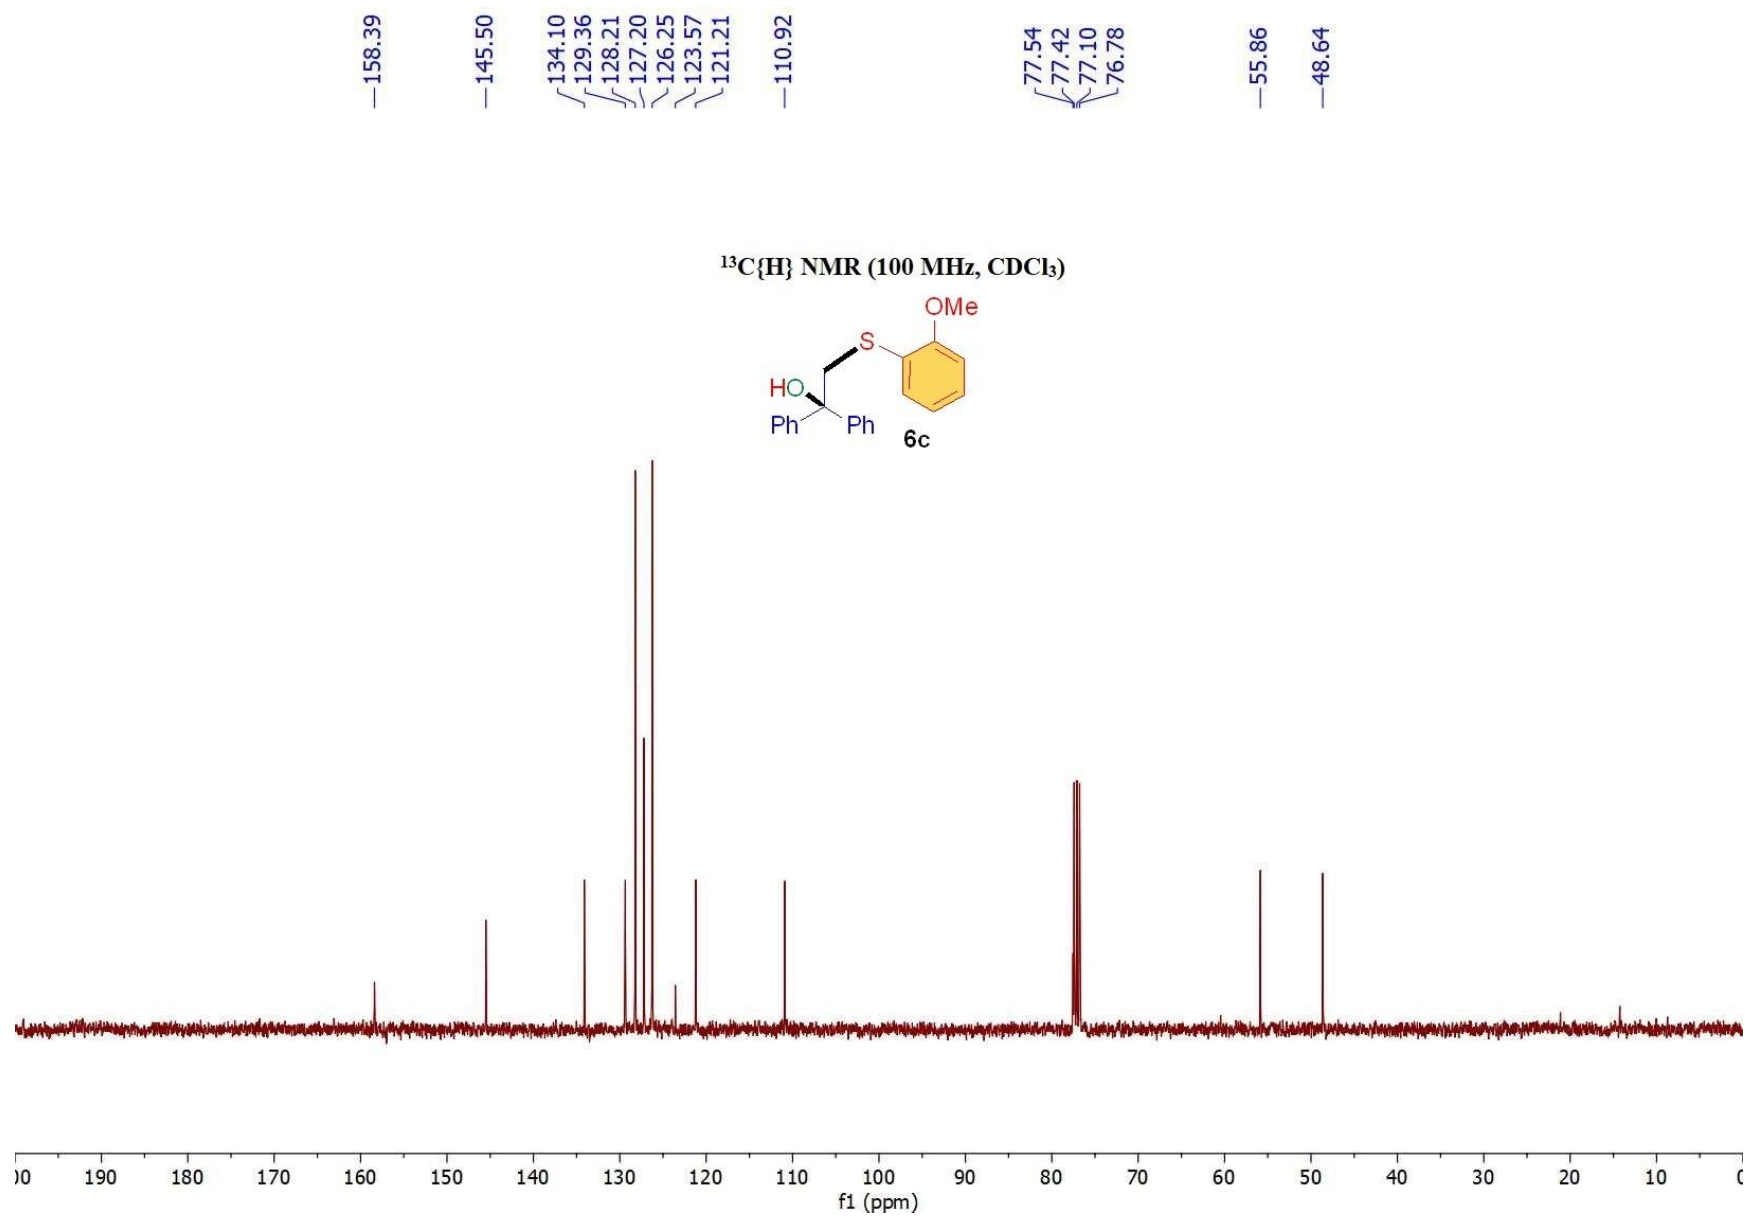

3-0211-2-OMe-H #1-10 RT: 0.01-0.26 AV: 10 NL: 9.86E6

FTMS + p ESI Full ms [200.00-2000.00]

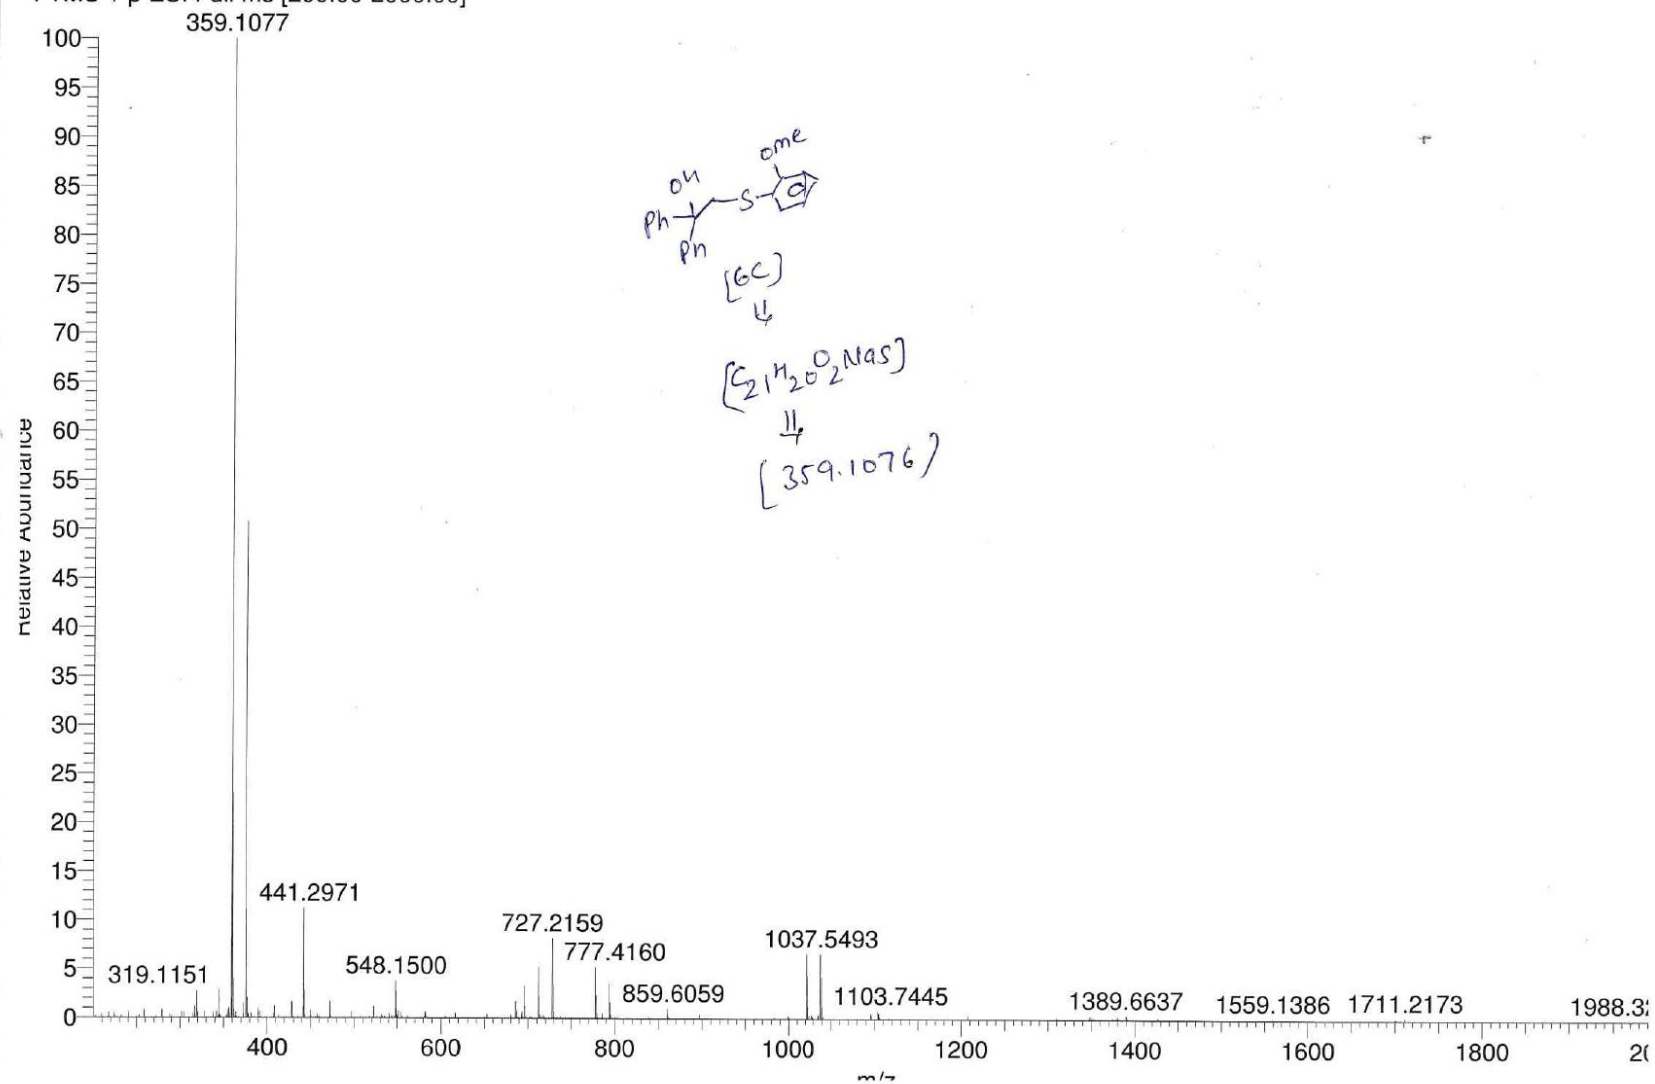

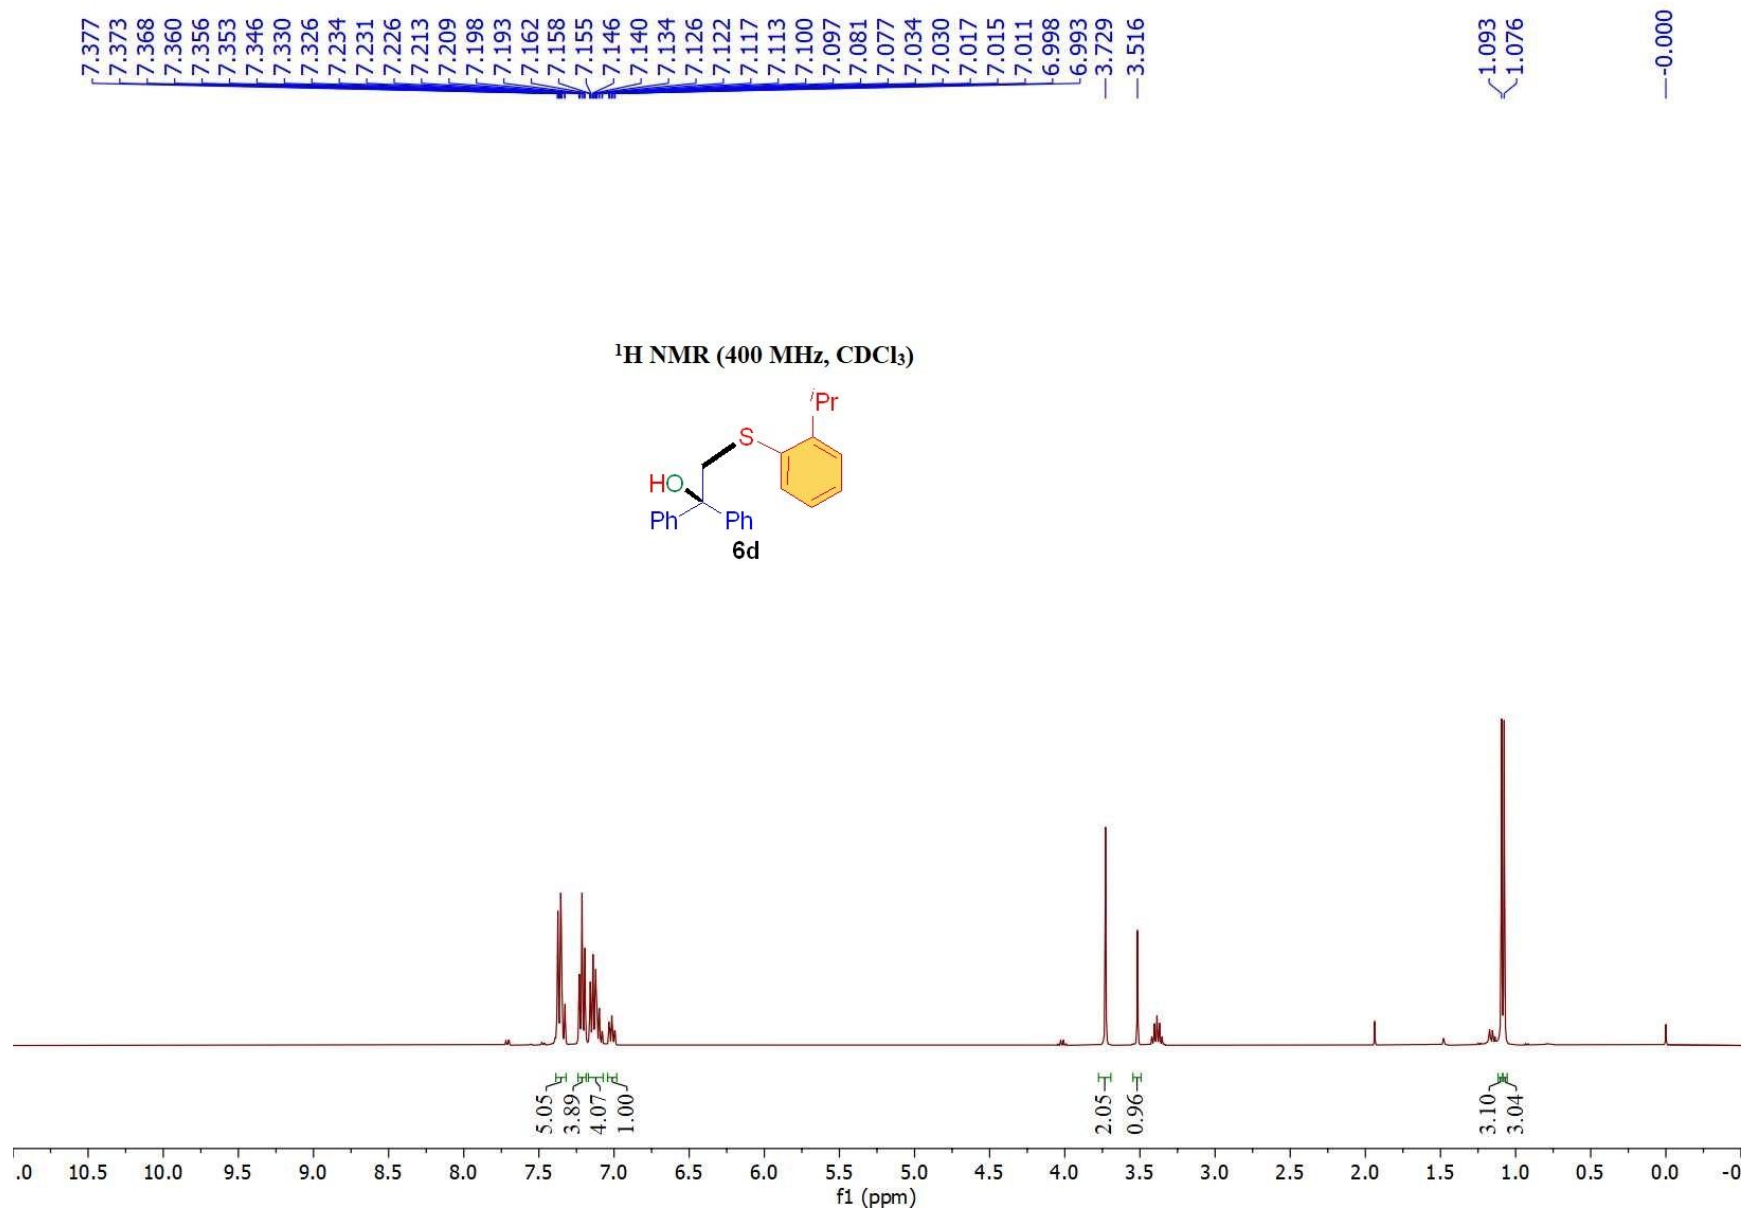

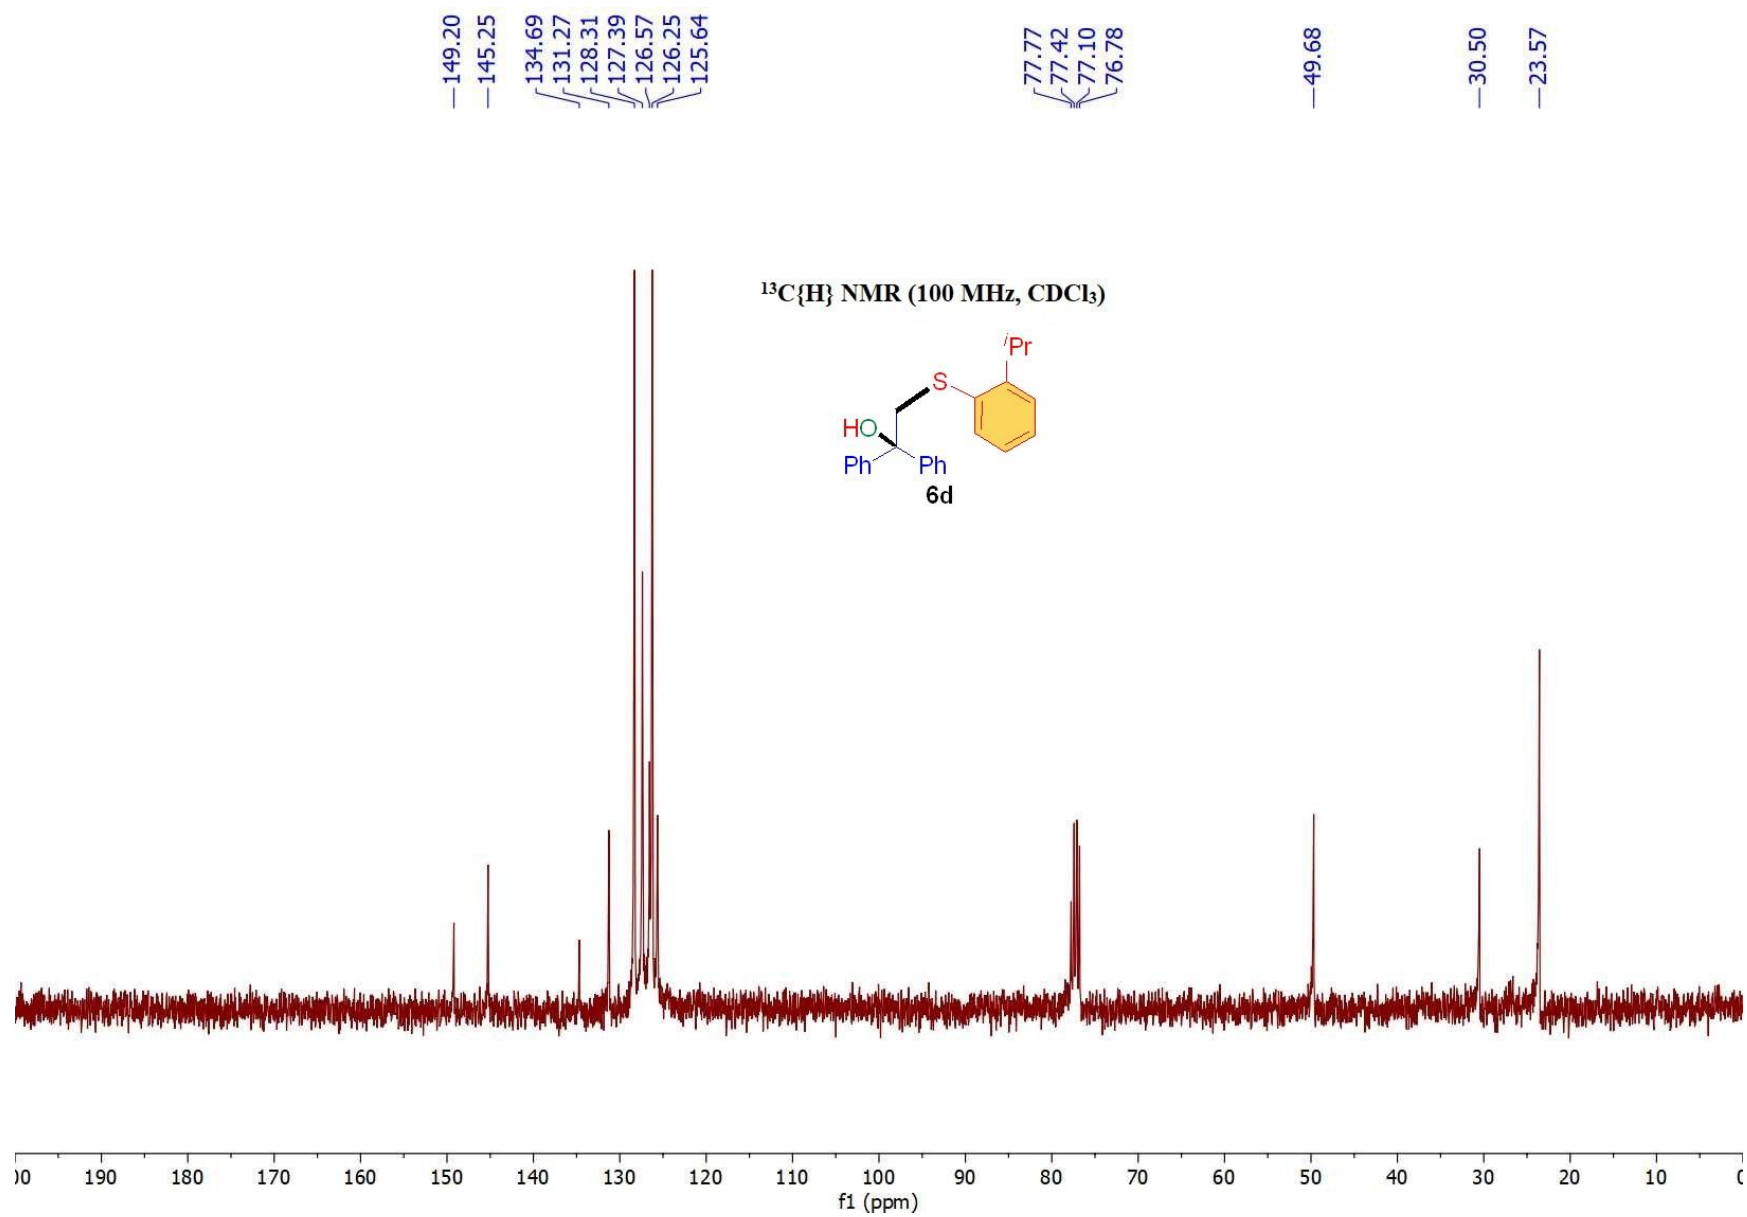

0211-2-iodopropyl-H #1-10 RT: 0.00-0.25 AV: 10 NL: 1.14E6  
FTMS + p ESI Full ms [200.00-2000.00]

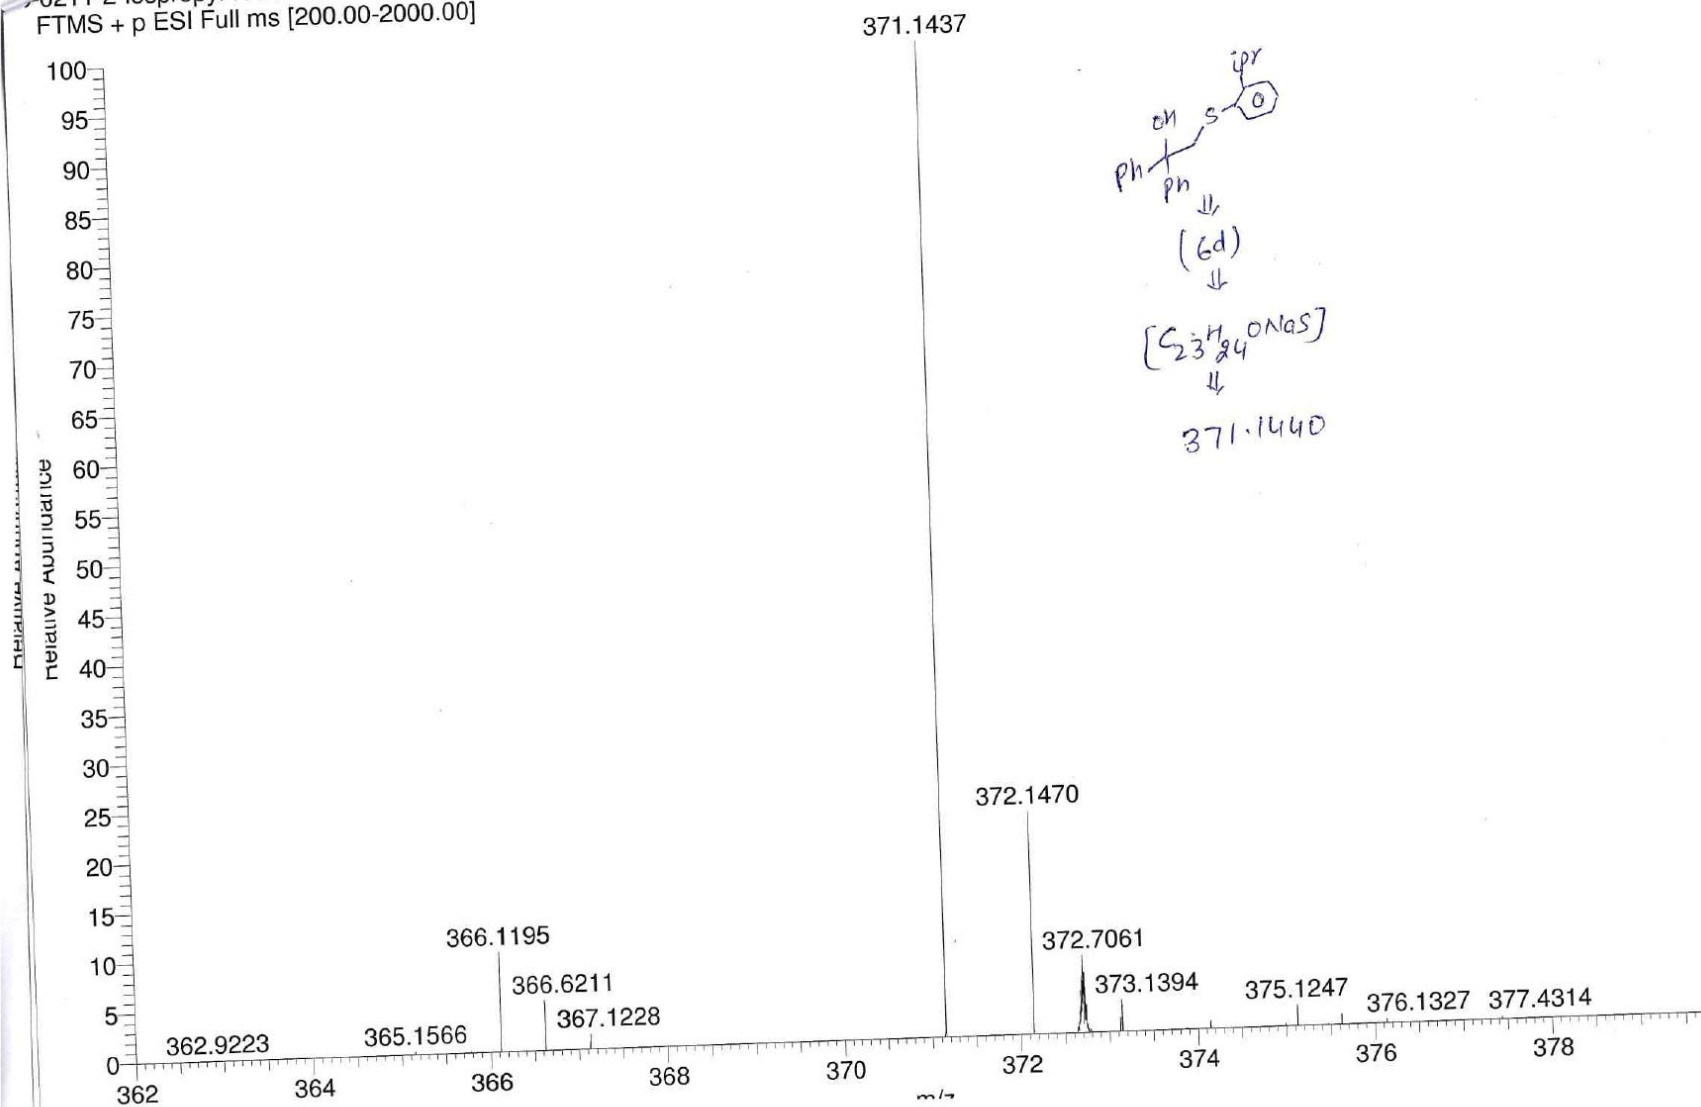

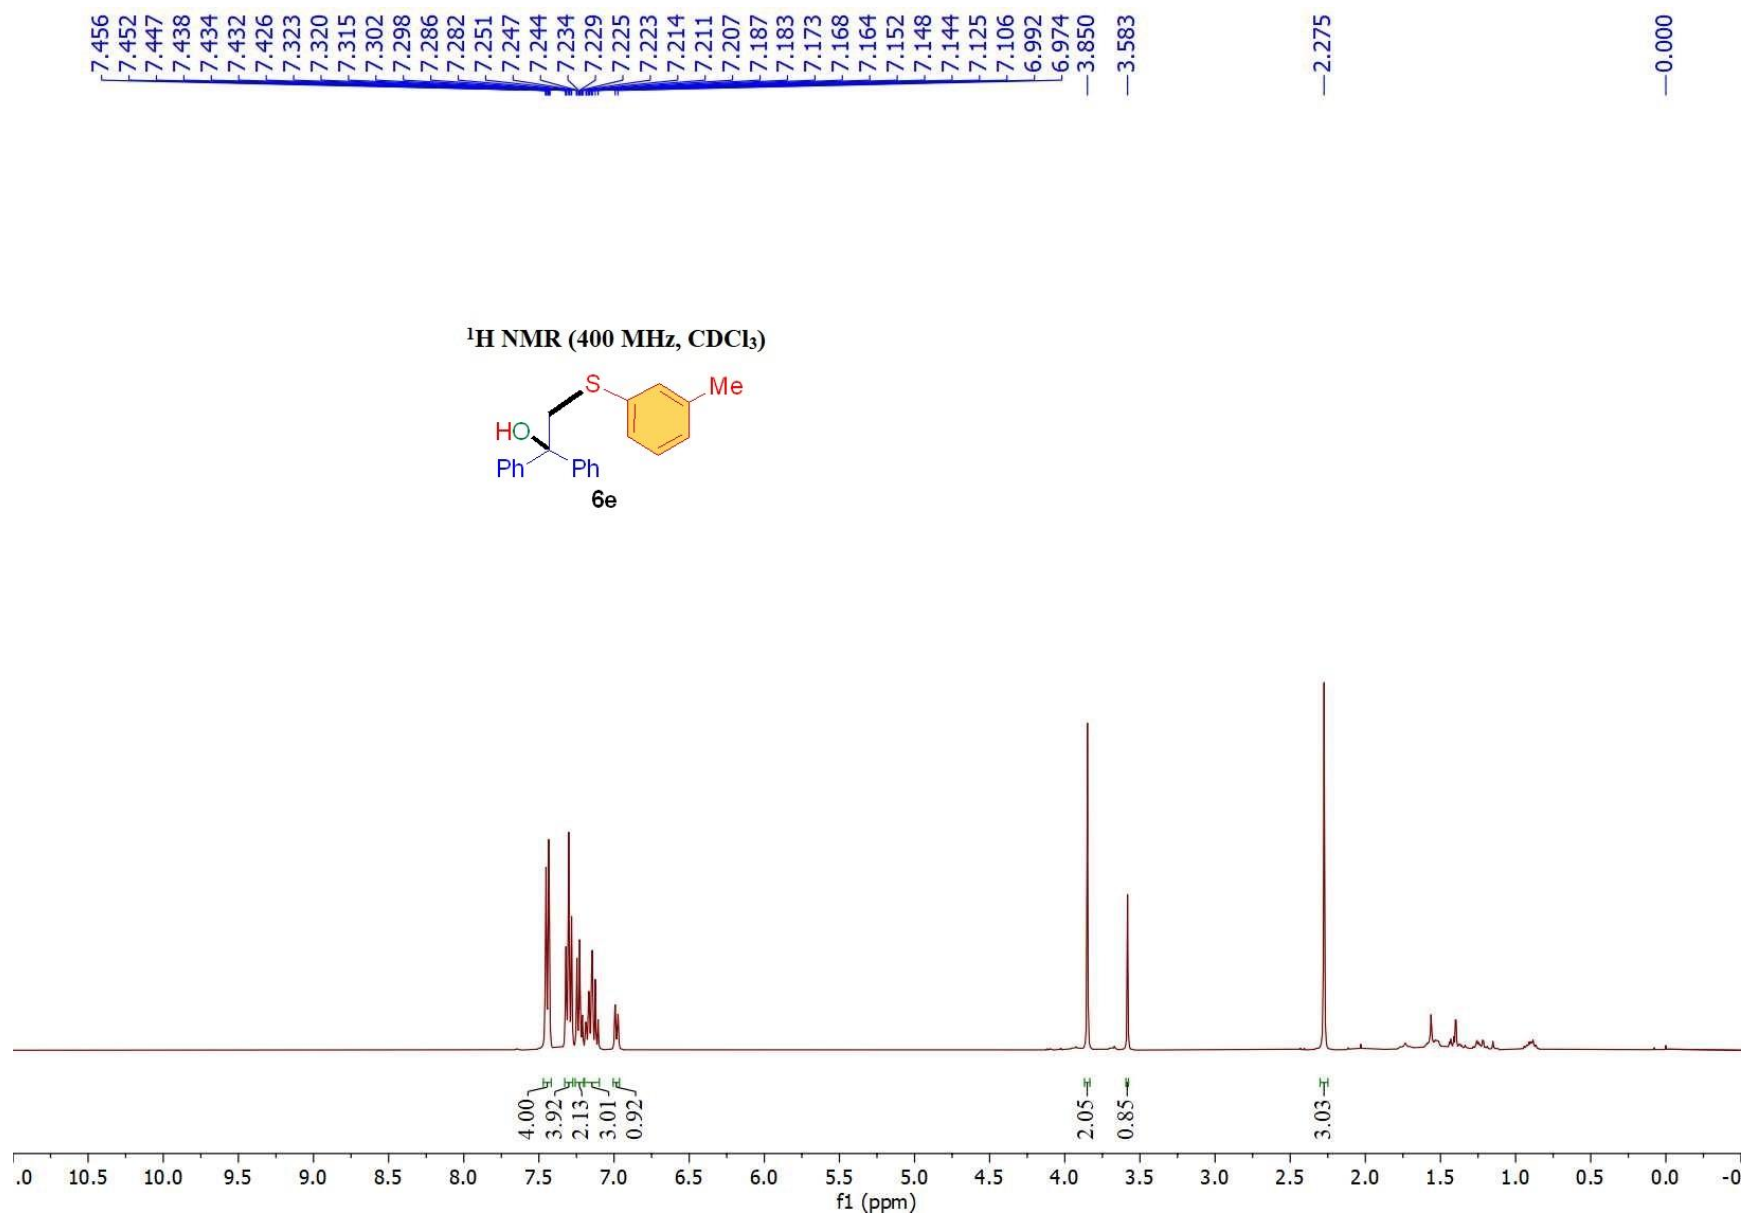

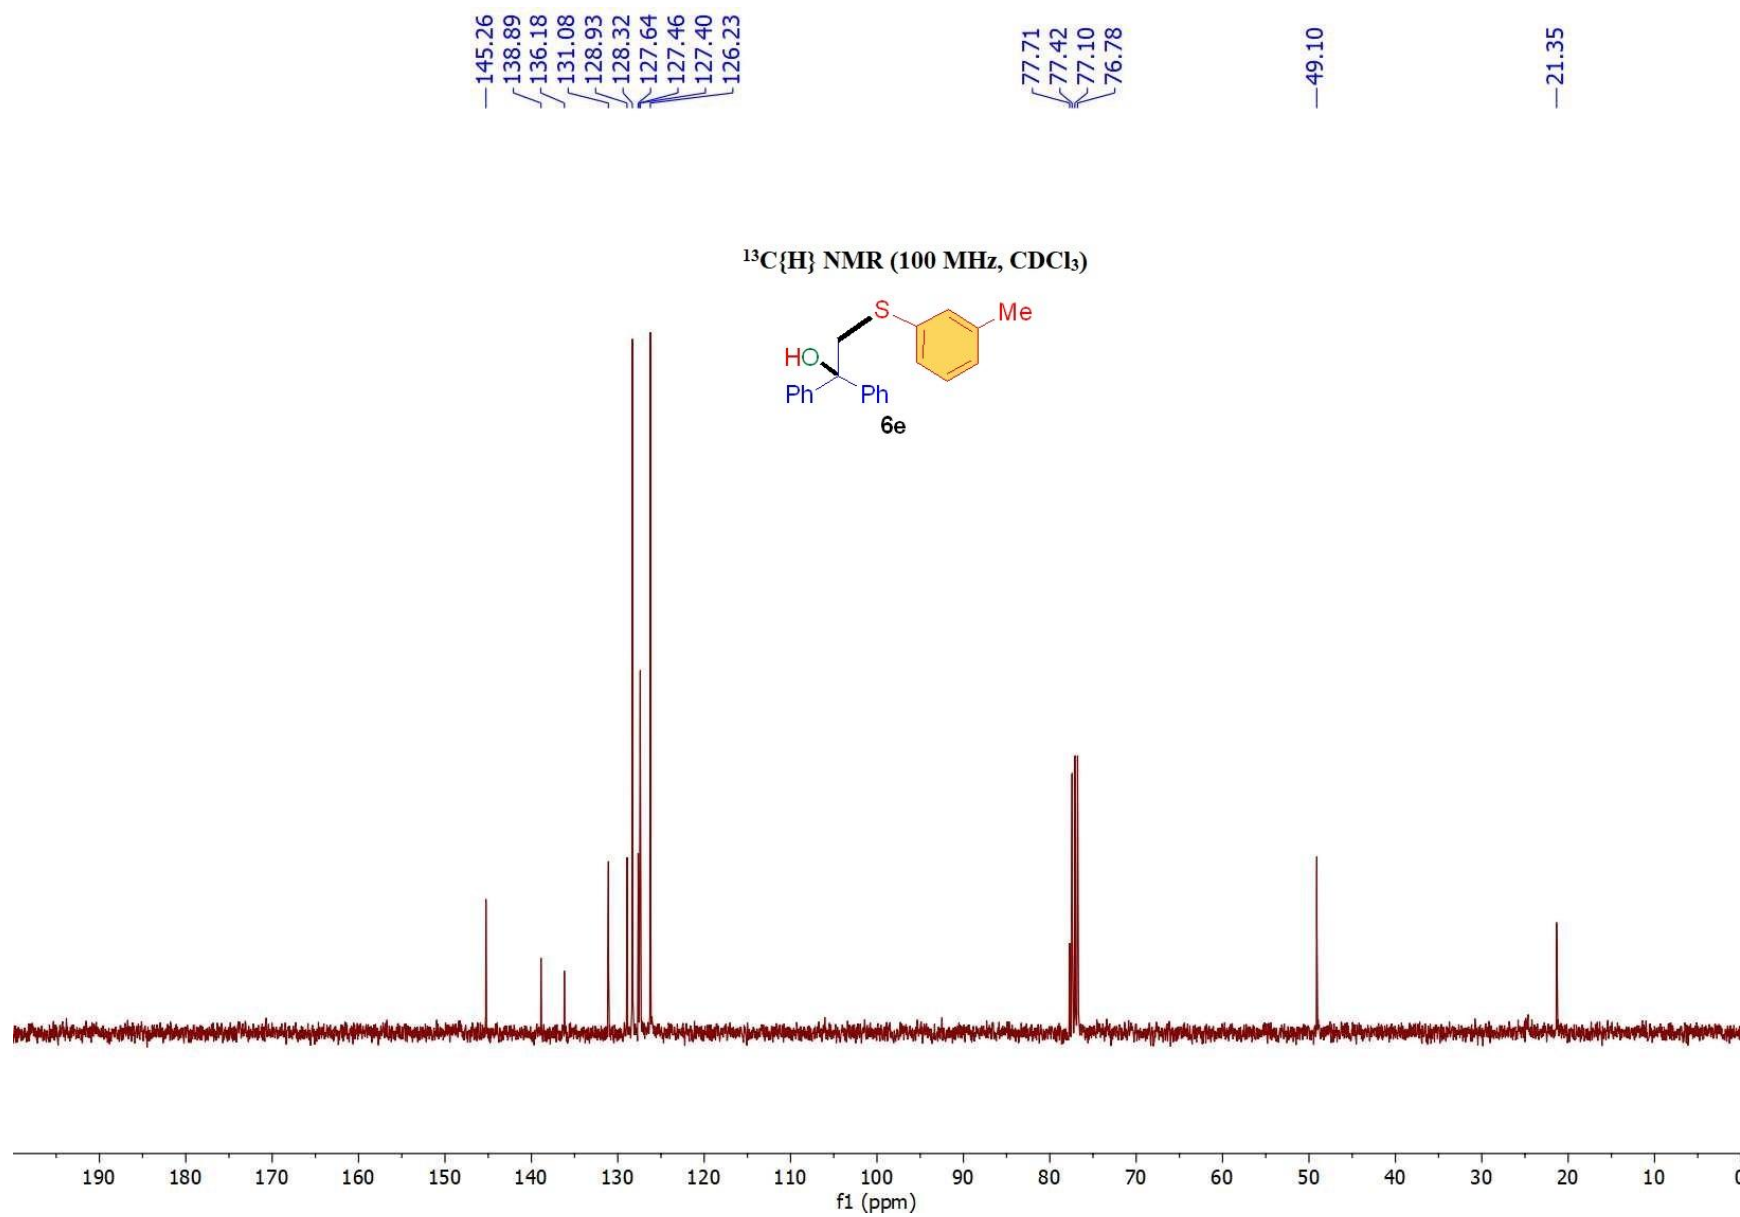

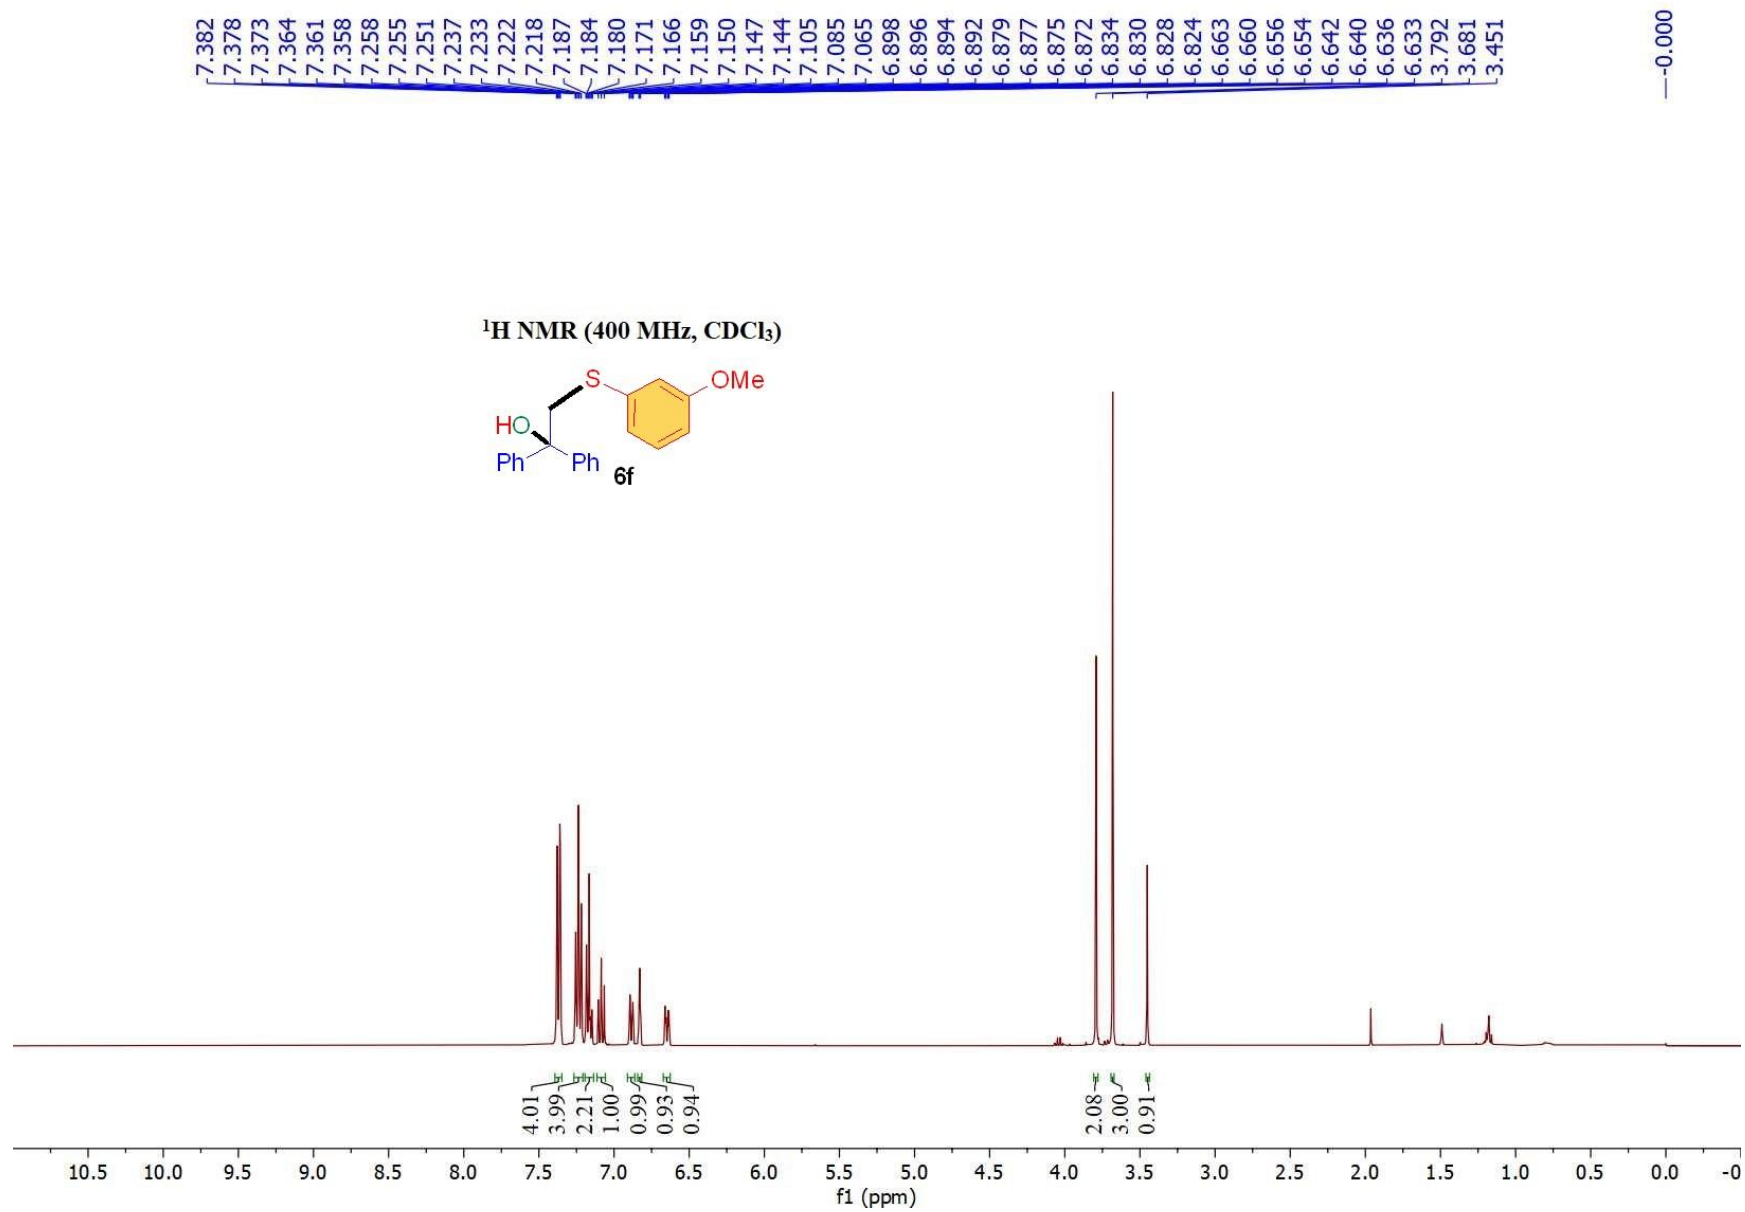

—159.84  
 —145.19  
 —137.82  
 129.93  
 128.36  
 127.46  
 126.23  
 122.34  
 —115.54  
 —112.49  
 77.77  
 77.42  
 77.10  
 76.78  
 —55.34  
 —48.79

$^{13}\text{C}\{\text{H}\}$  NMR (100 MHz,  $\text{CDCl}_3$ )

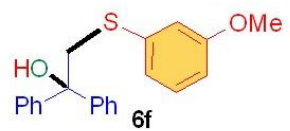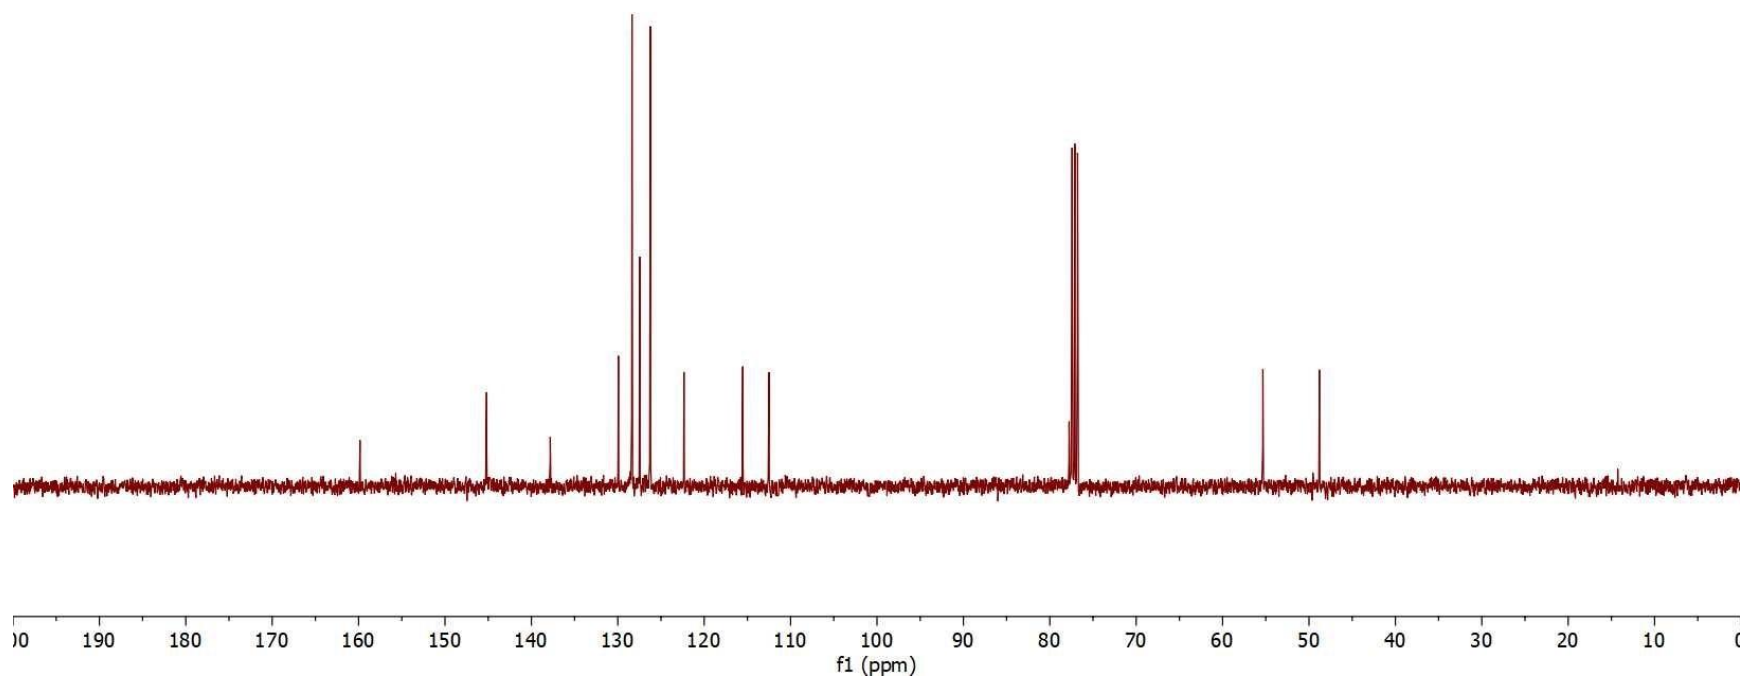

SPEC: lei1590\_1208-3-ome 10-Dec-24 Elapse: 04:48.1 137  
 Samp: Start : 15:01:03 251  
 Mode: EI +VE +LMR BSCAN (EXP) UP LR NRM  
 Oper: Inlet :  
 Base: 154.1 Inten : 130612736 Masses: 45 > 400  
 Norm: 154.1 RIC : 523714306 #peaks: 476  
 Peak: 5.00 mmu

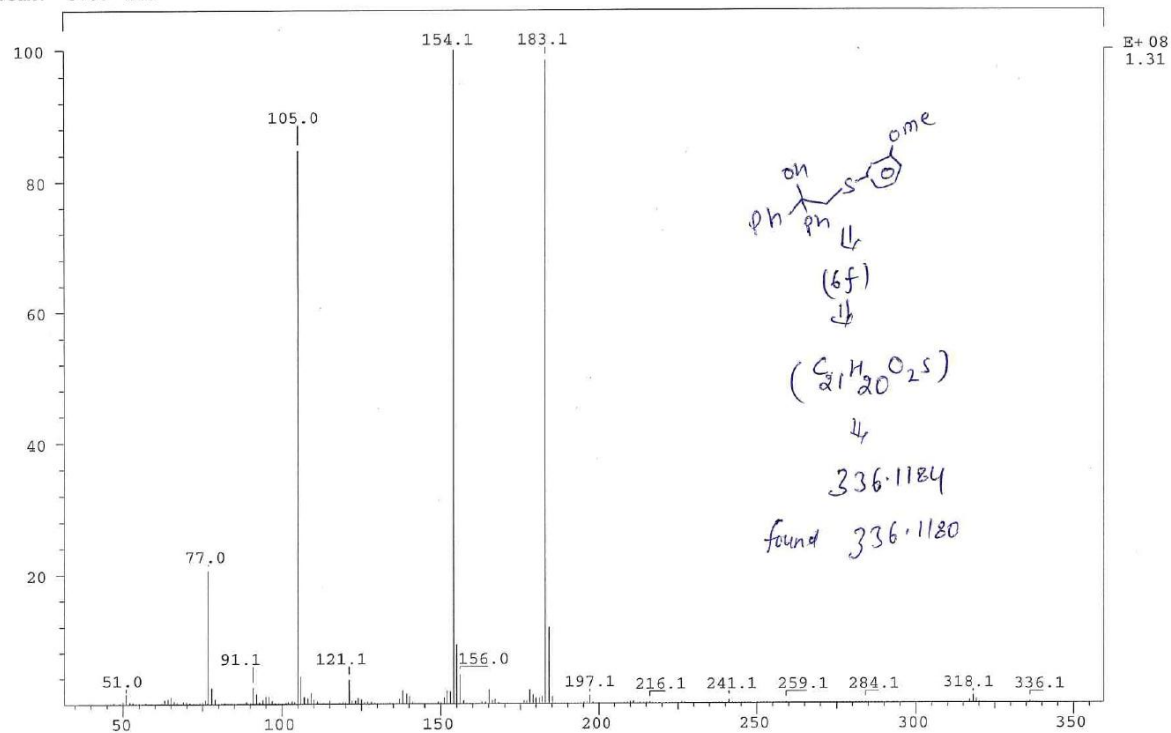

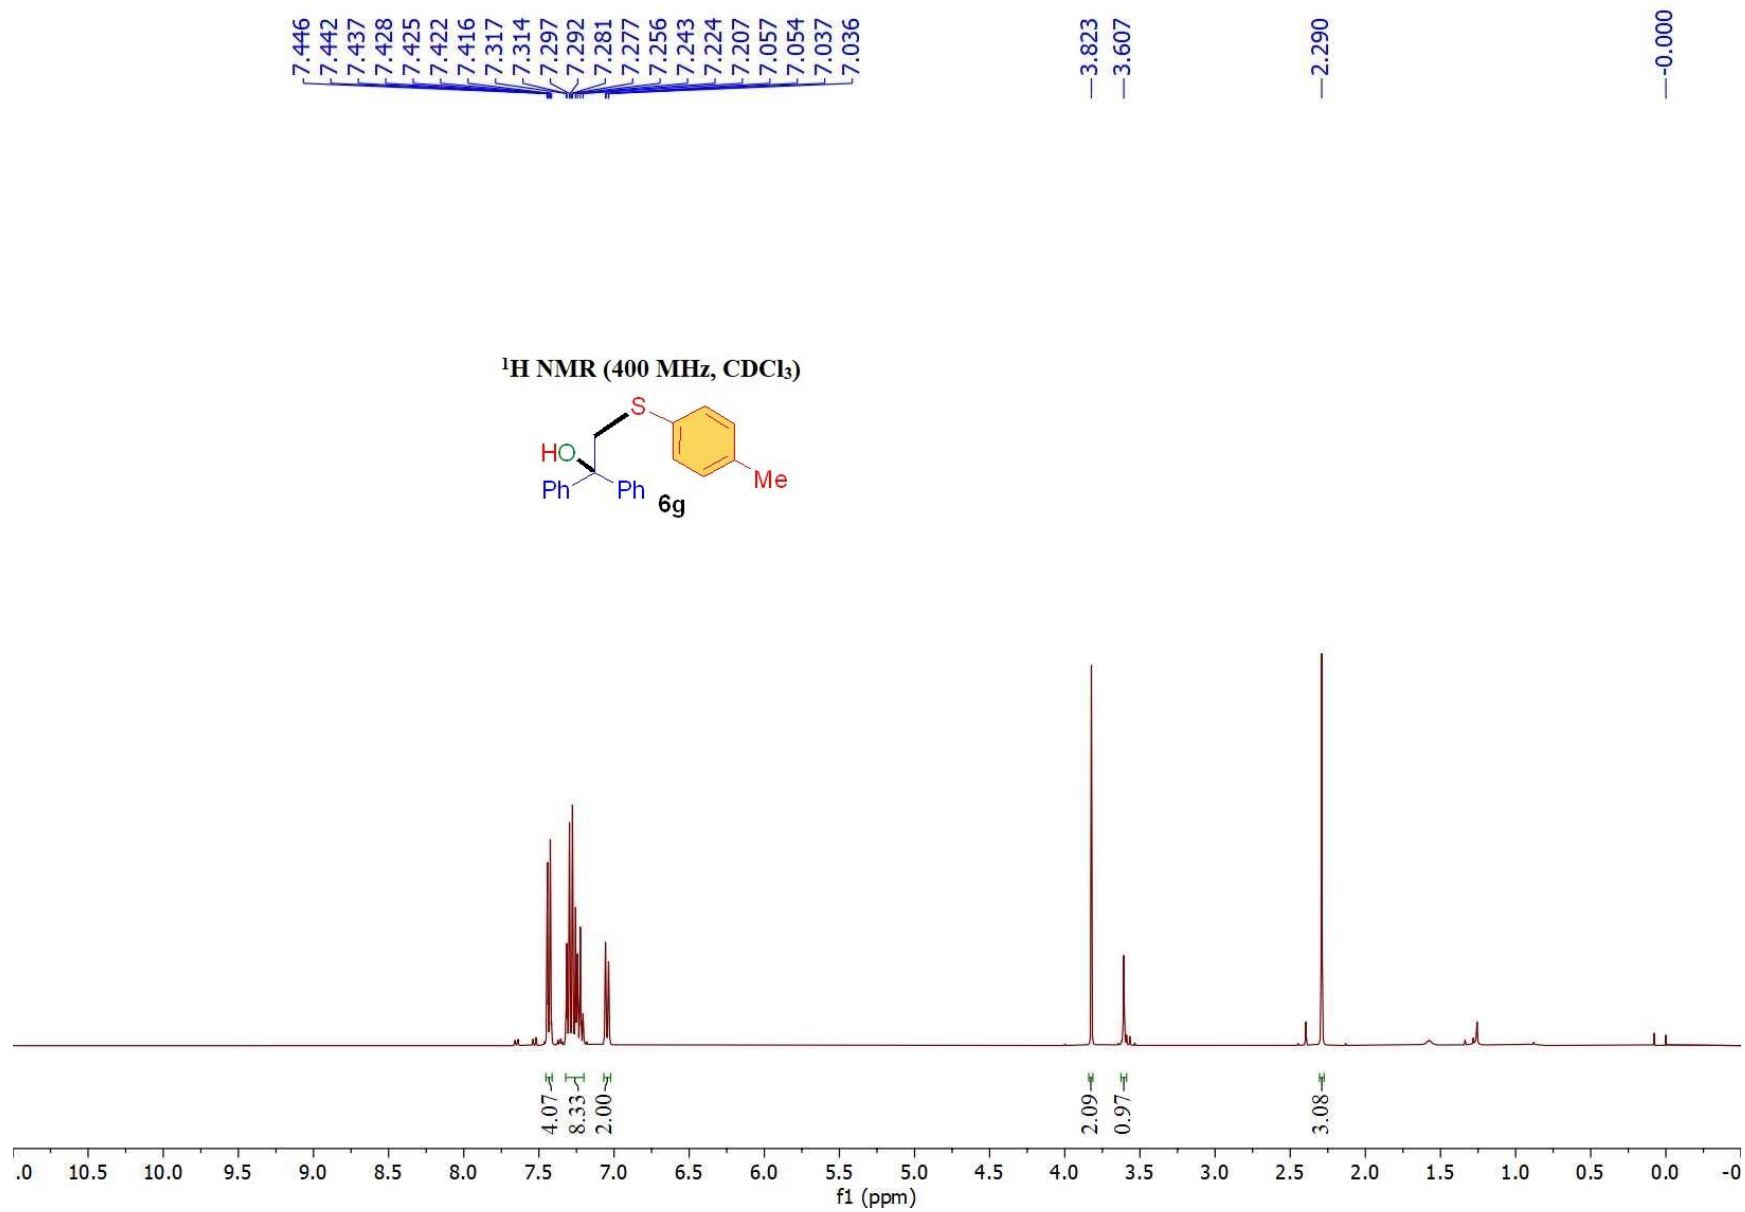

—145.28  
 136.91  
 132.86  
 130.95  
 129.87  
 128.31  
 127.36  
 126.22

77.75  
 77.41  
 77.10  
 76.78

—49.79

—21.07

$^{13}\text{C}\{\text{H}\}$  NMR (100 MHz,  $\text{CDCl}_3$ )

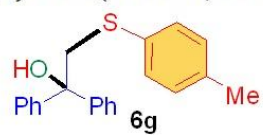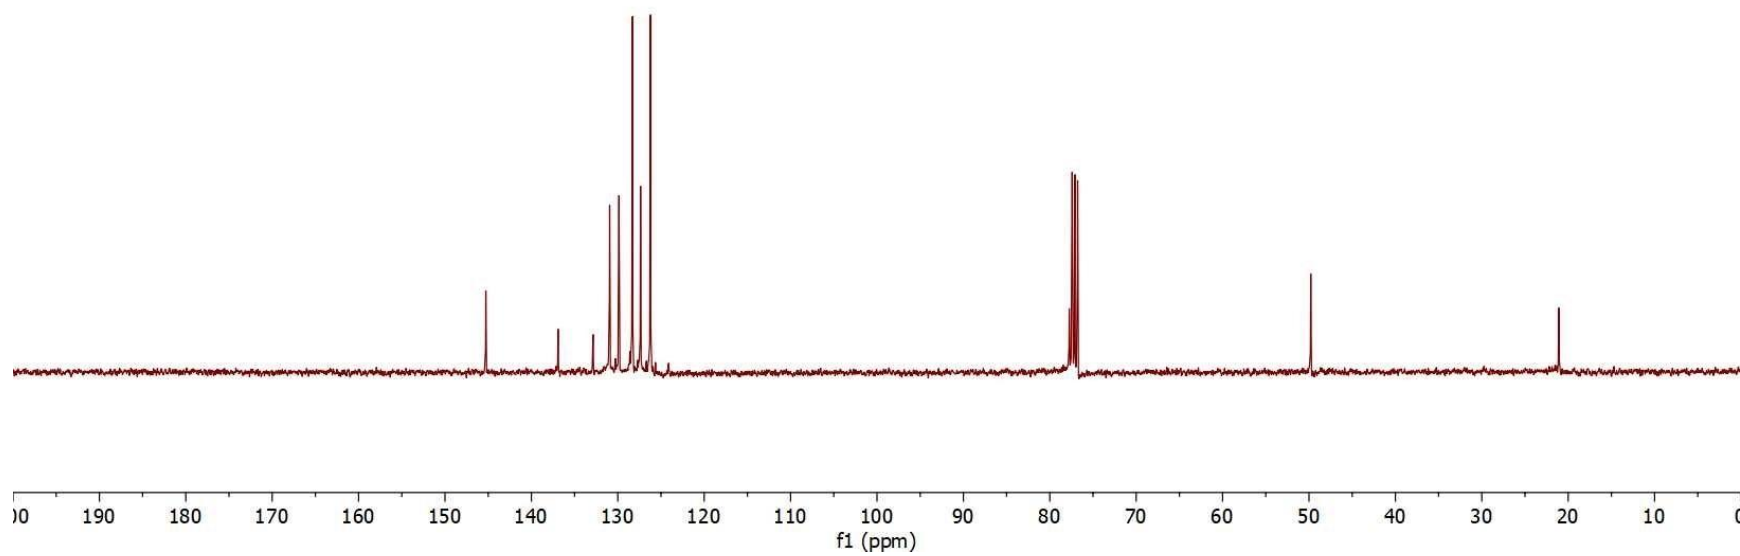

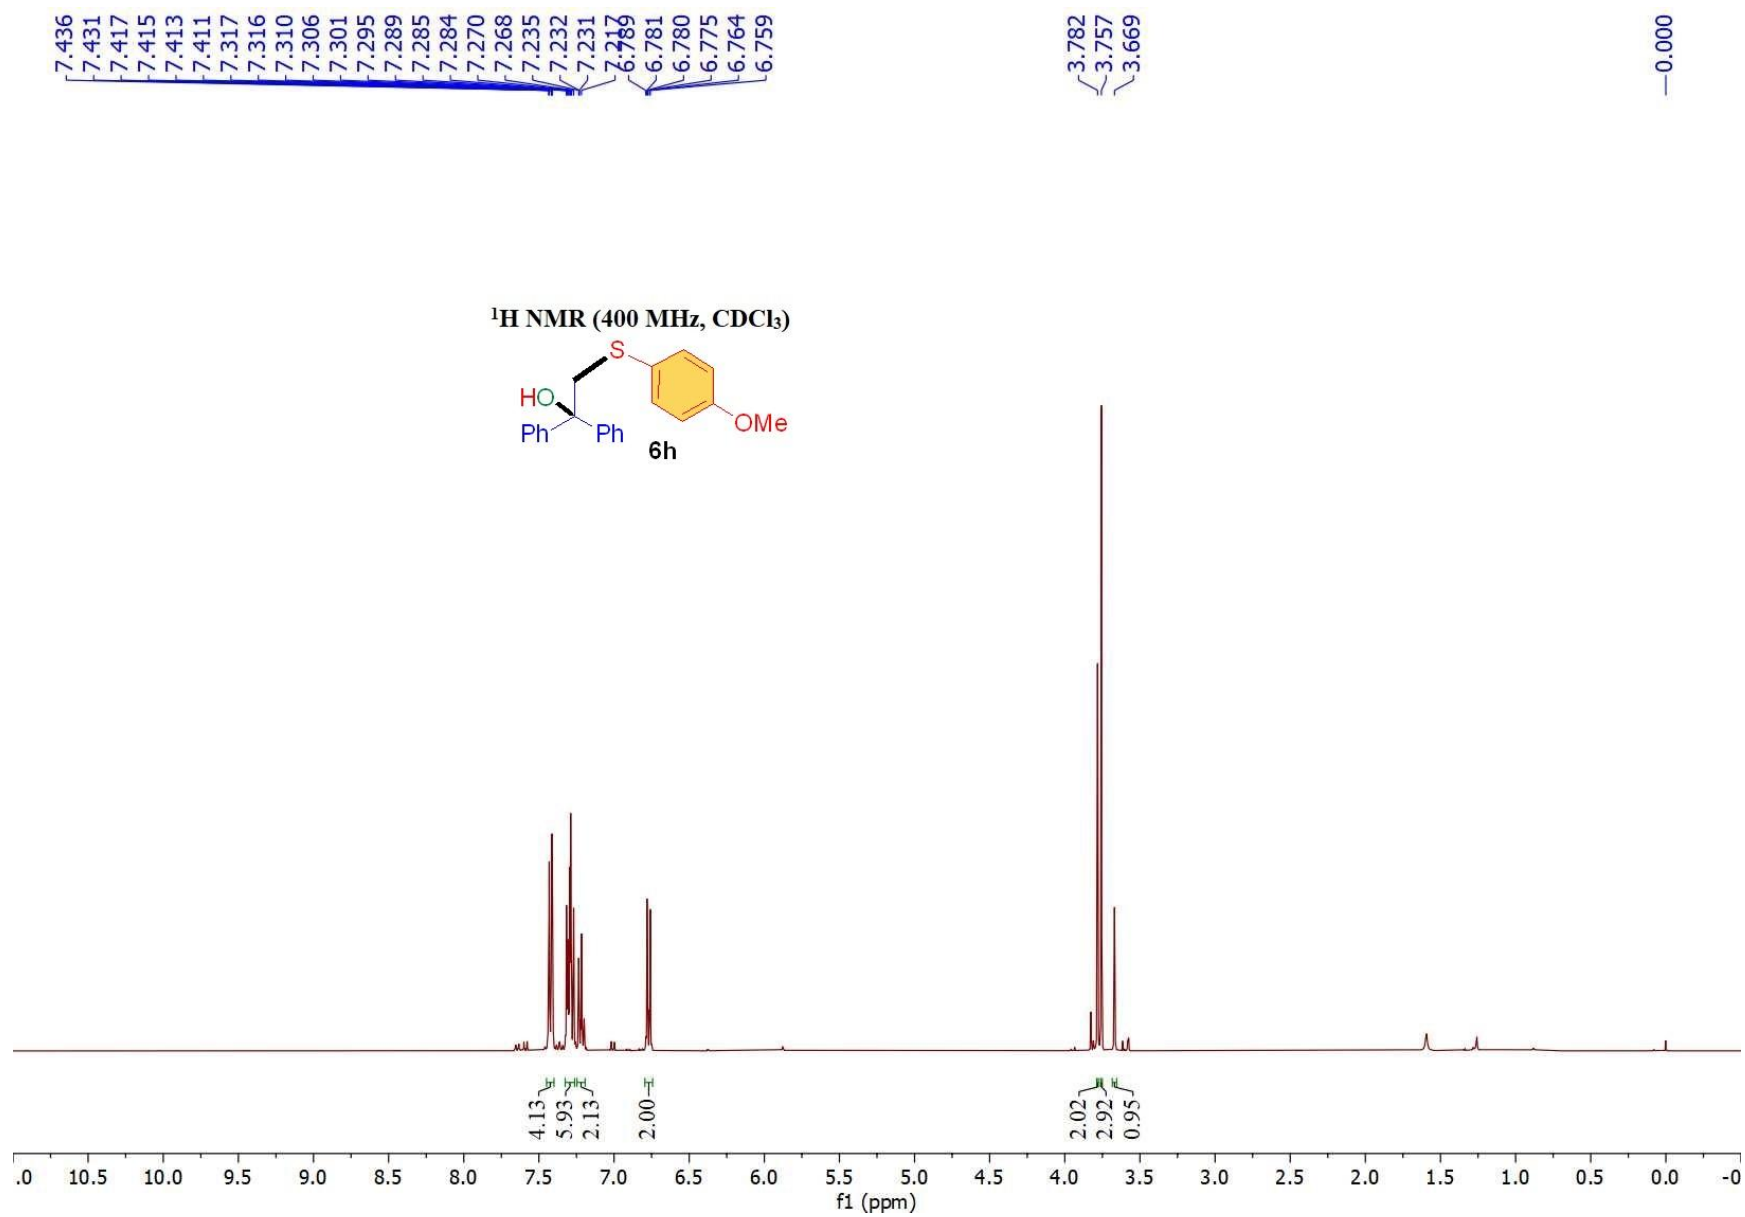

—159.18  
 —145.28  
 133.64  
 128.28  
 127.32  
 126.79  
 126.22  
 —114.73  
 77.72  
 77.42  
 77.10  
 76.78  
 —55.40  
 —50.99

$^{13}\text{C}\{\text{H}\}$  NMR (100 MHz,  $\text{CDCl}_3$ )

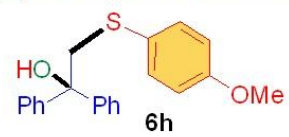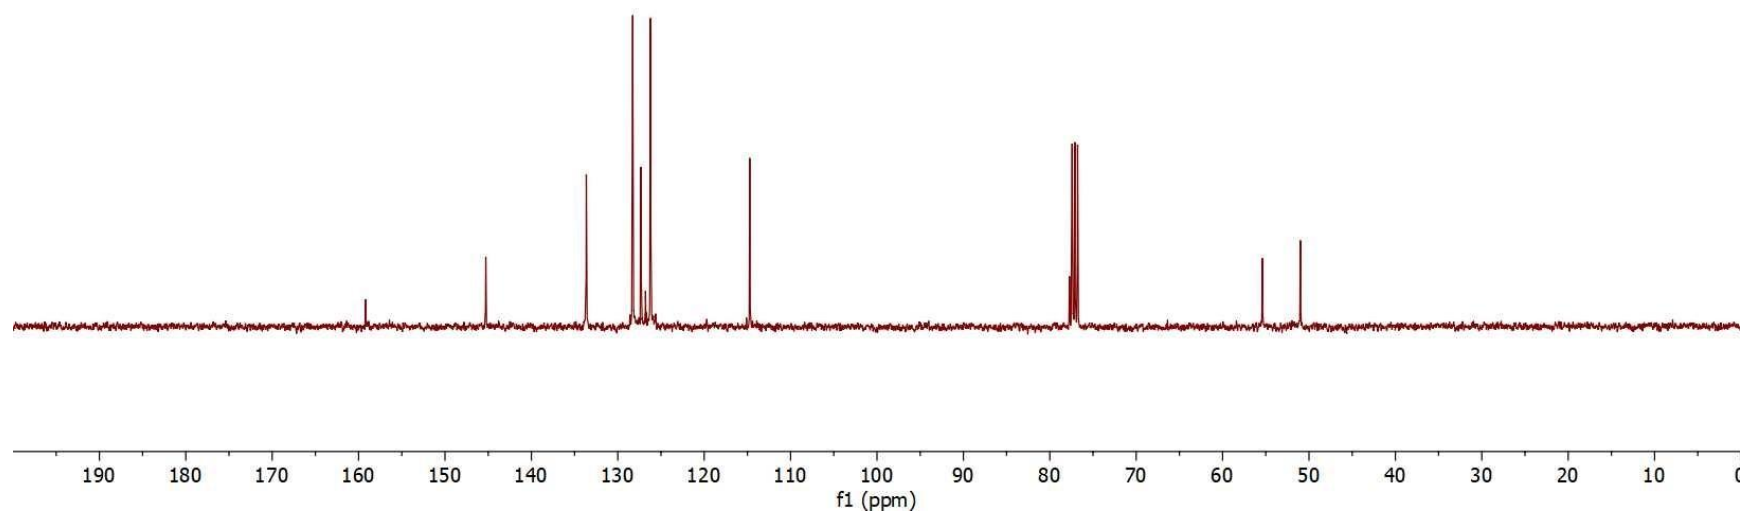

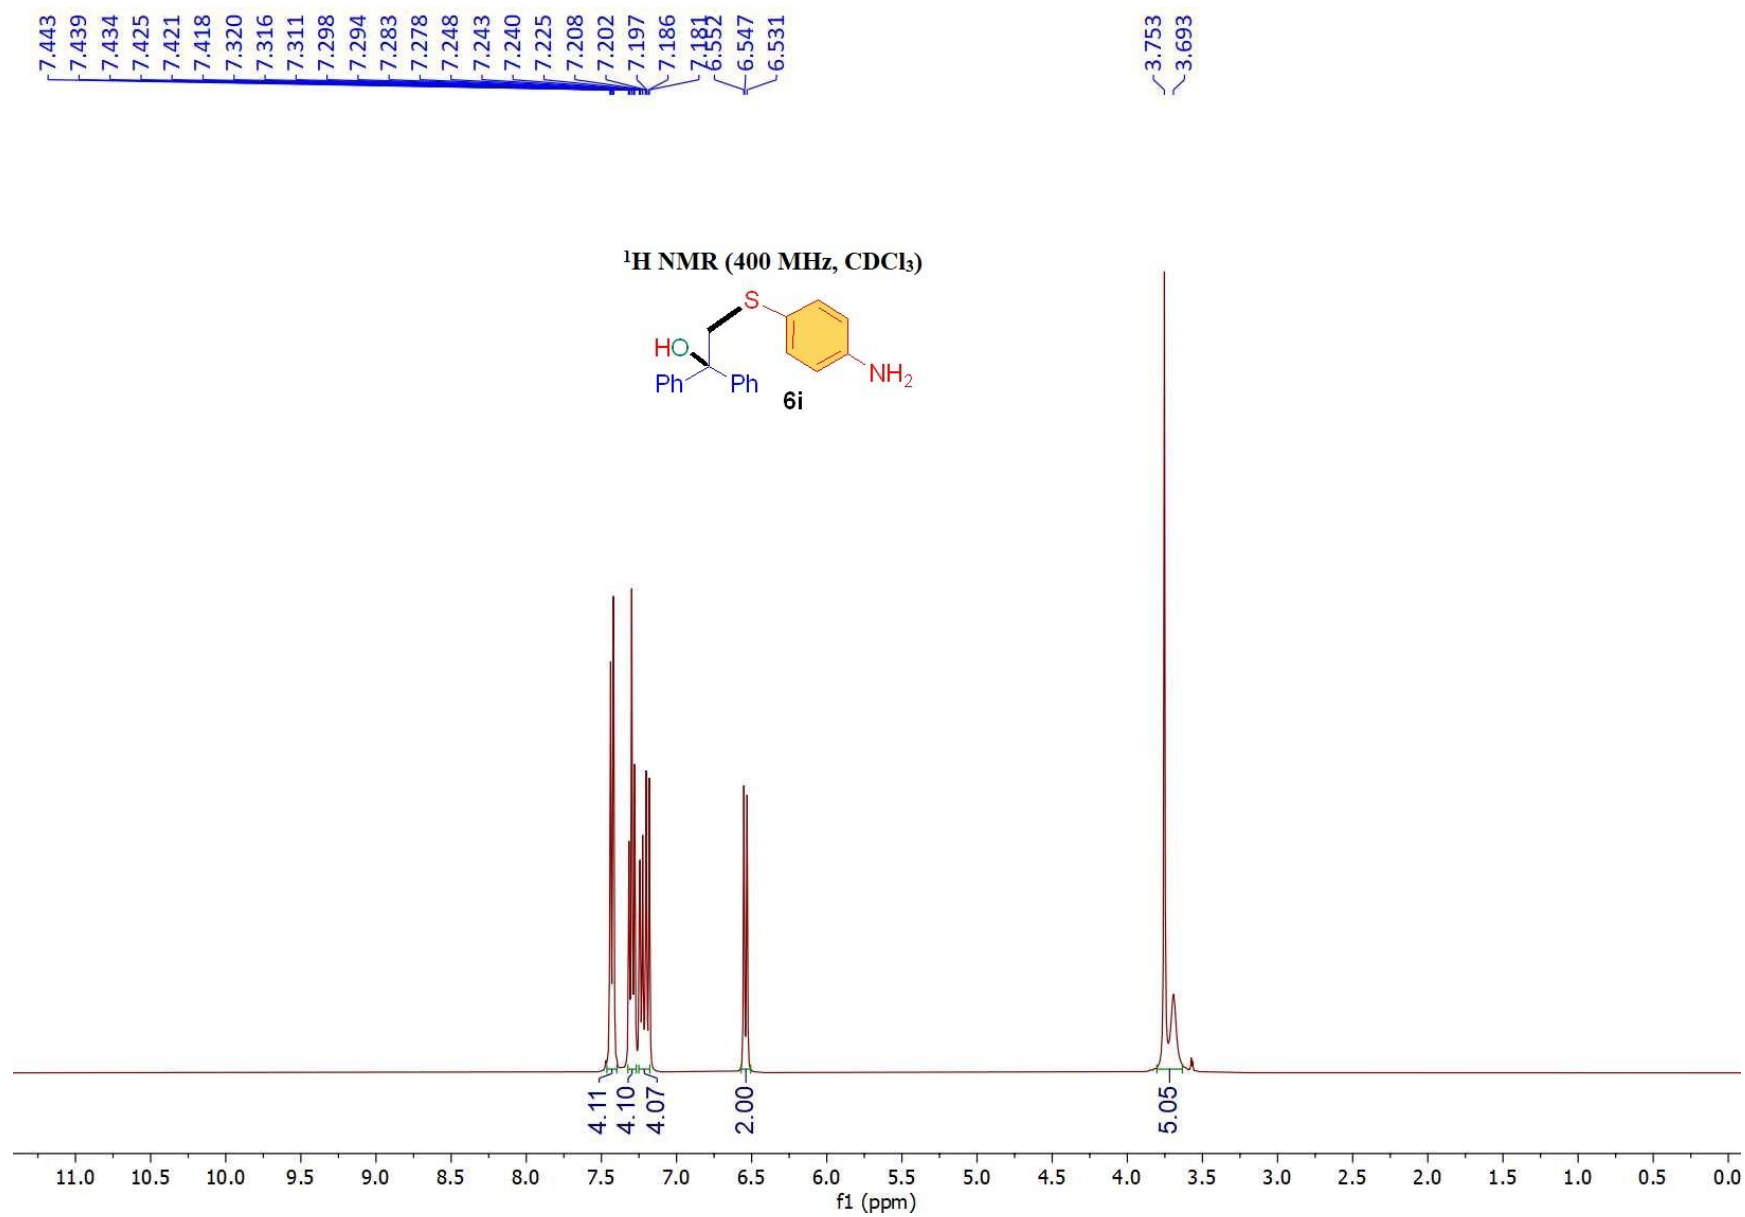

146.21  
145.37

134.12  
128.25  
127.25  
126.23  
123.60

115.66

77.70  
77.42  
77.10  
76.78

51.49

$^{13}\text{C}\{\text{H}\}$  NMR (100 MHz,  $\text{CDCl}_3$ )

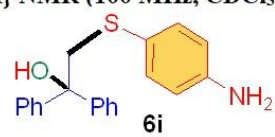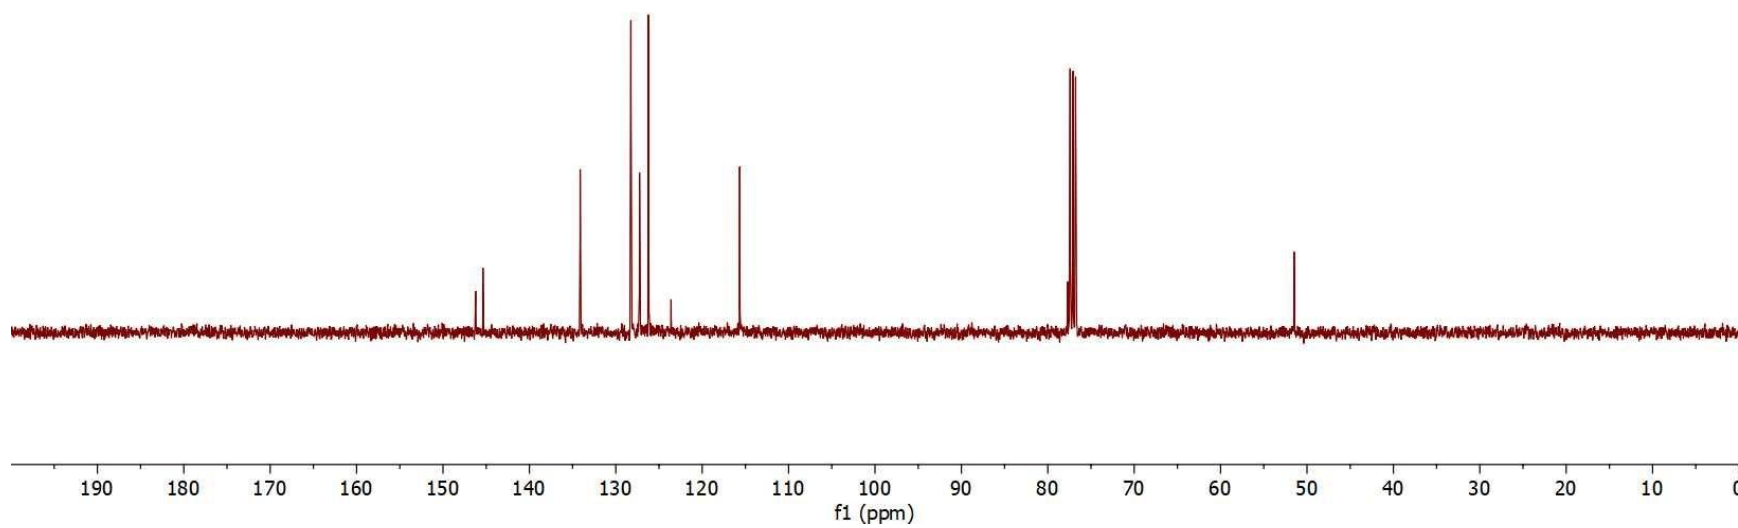

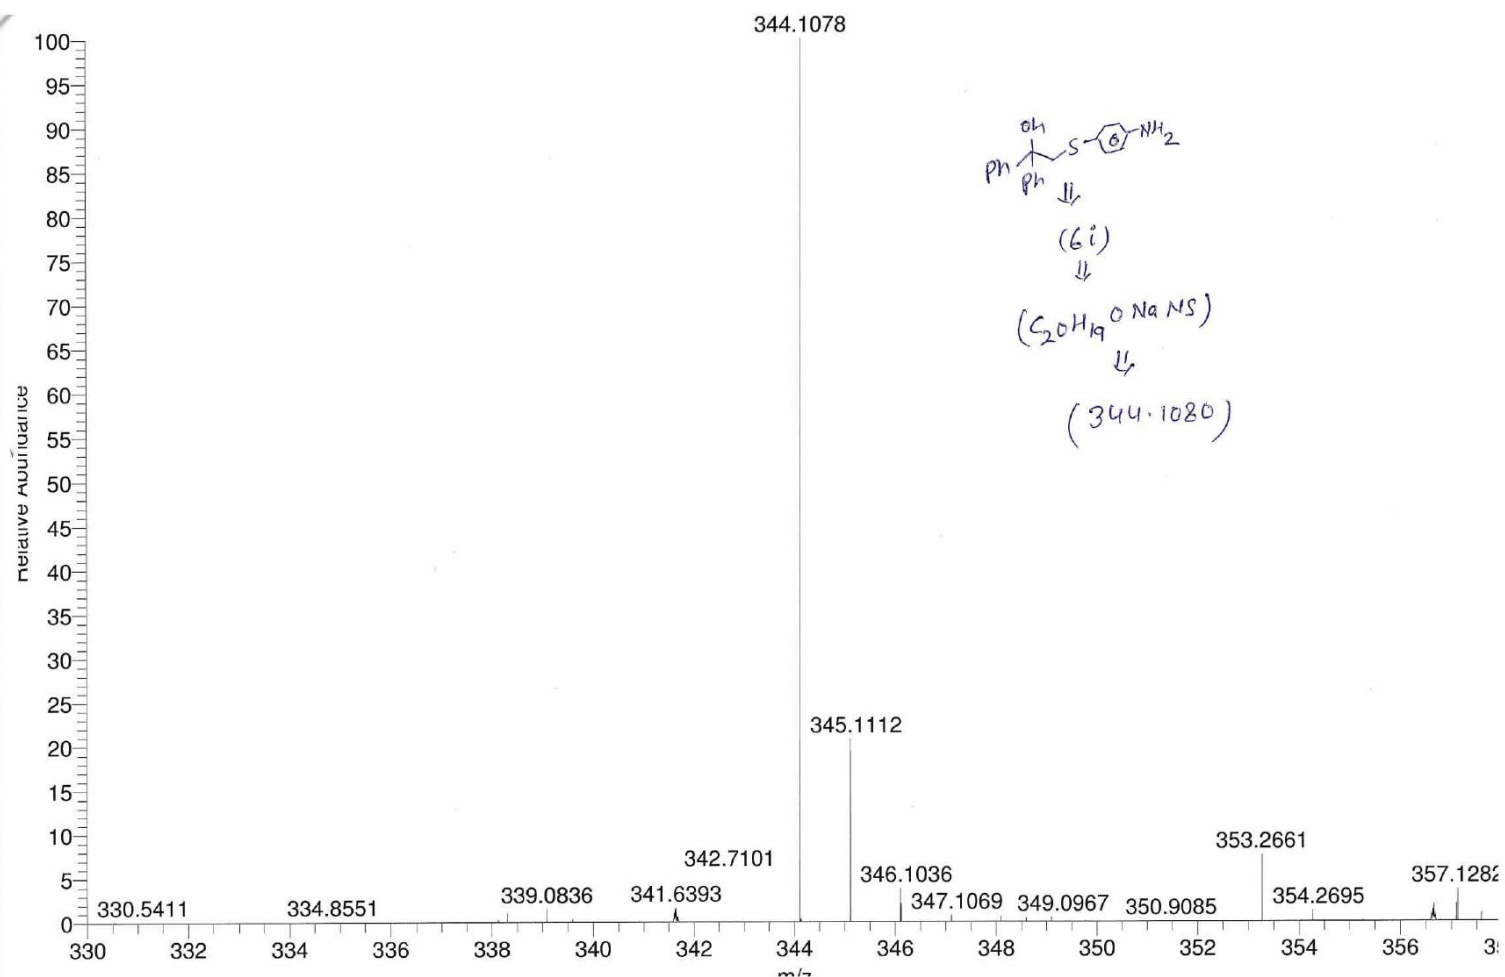

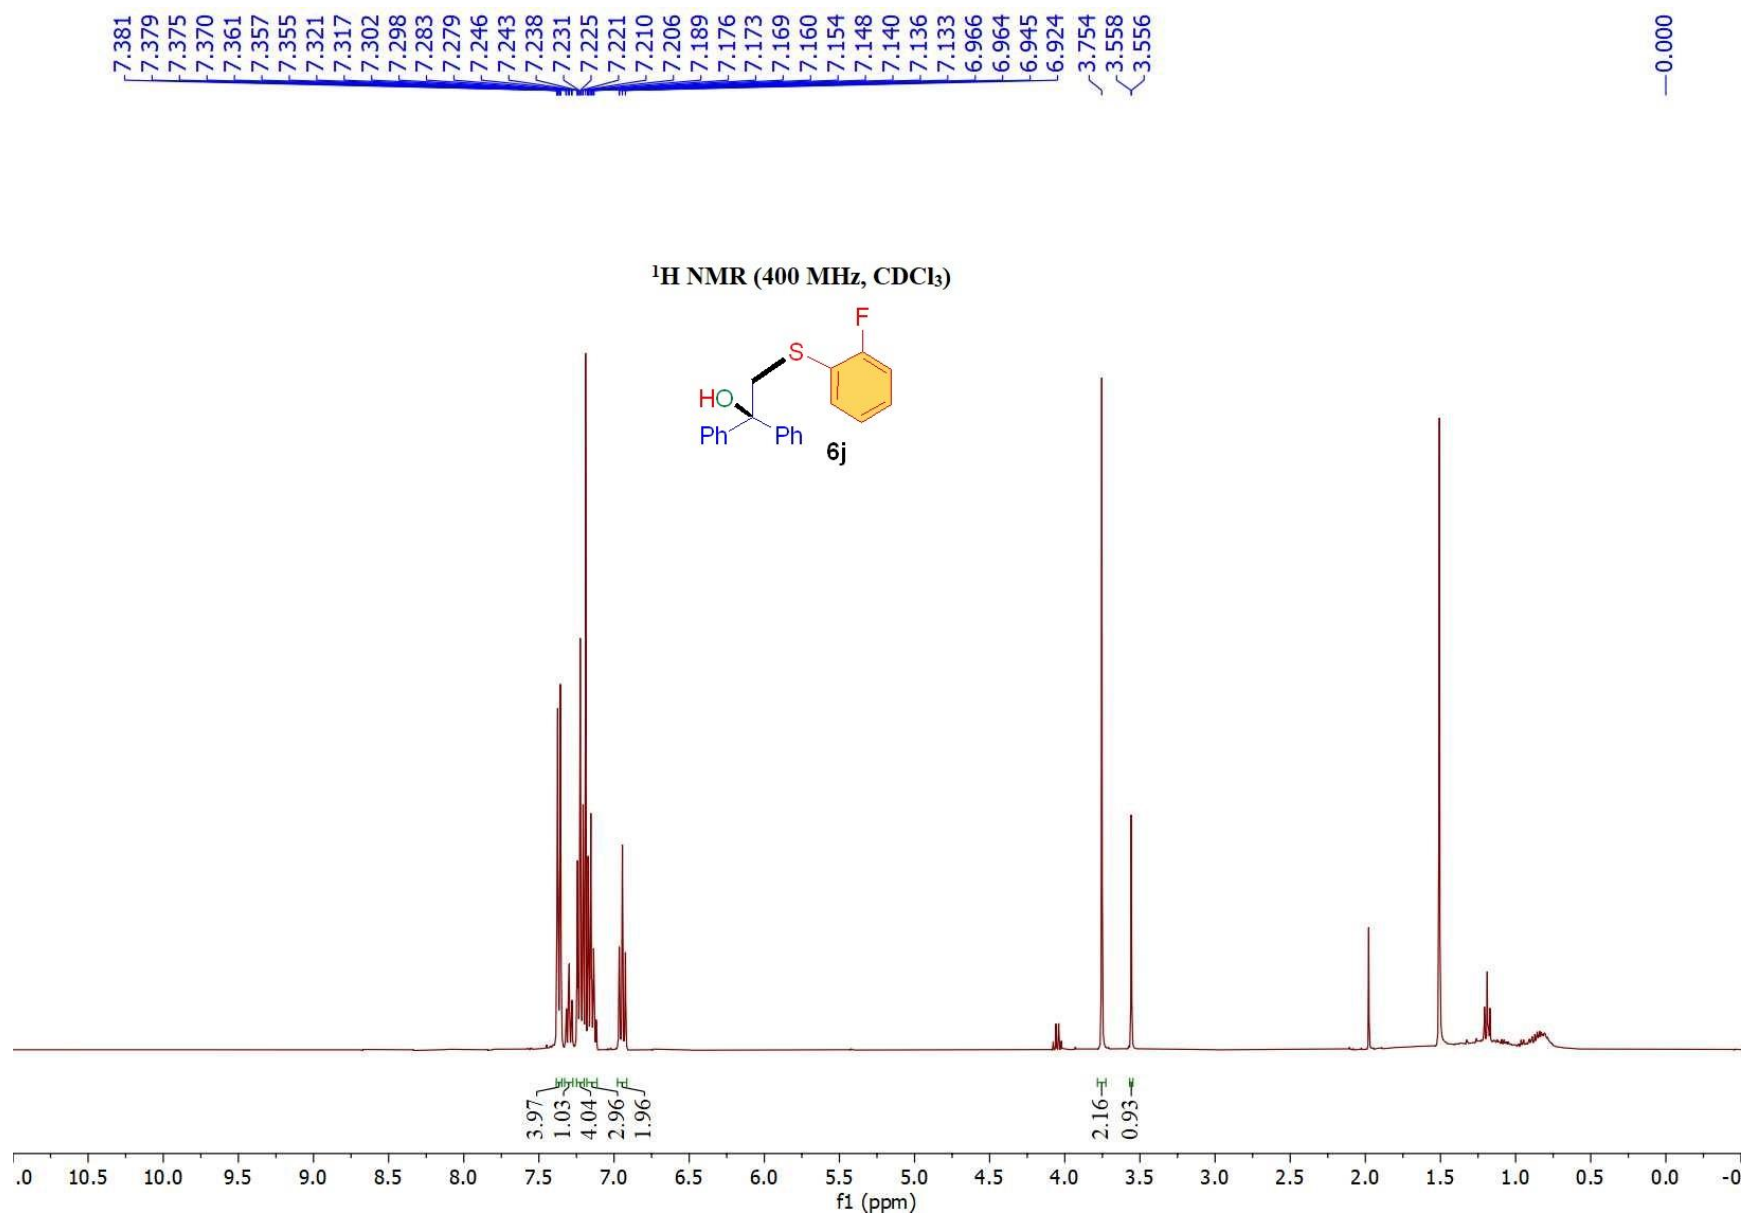

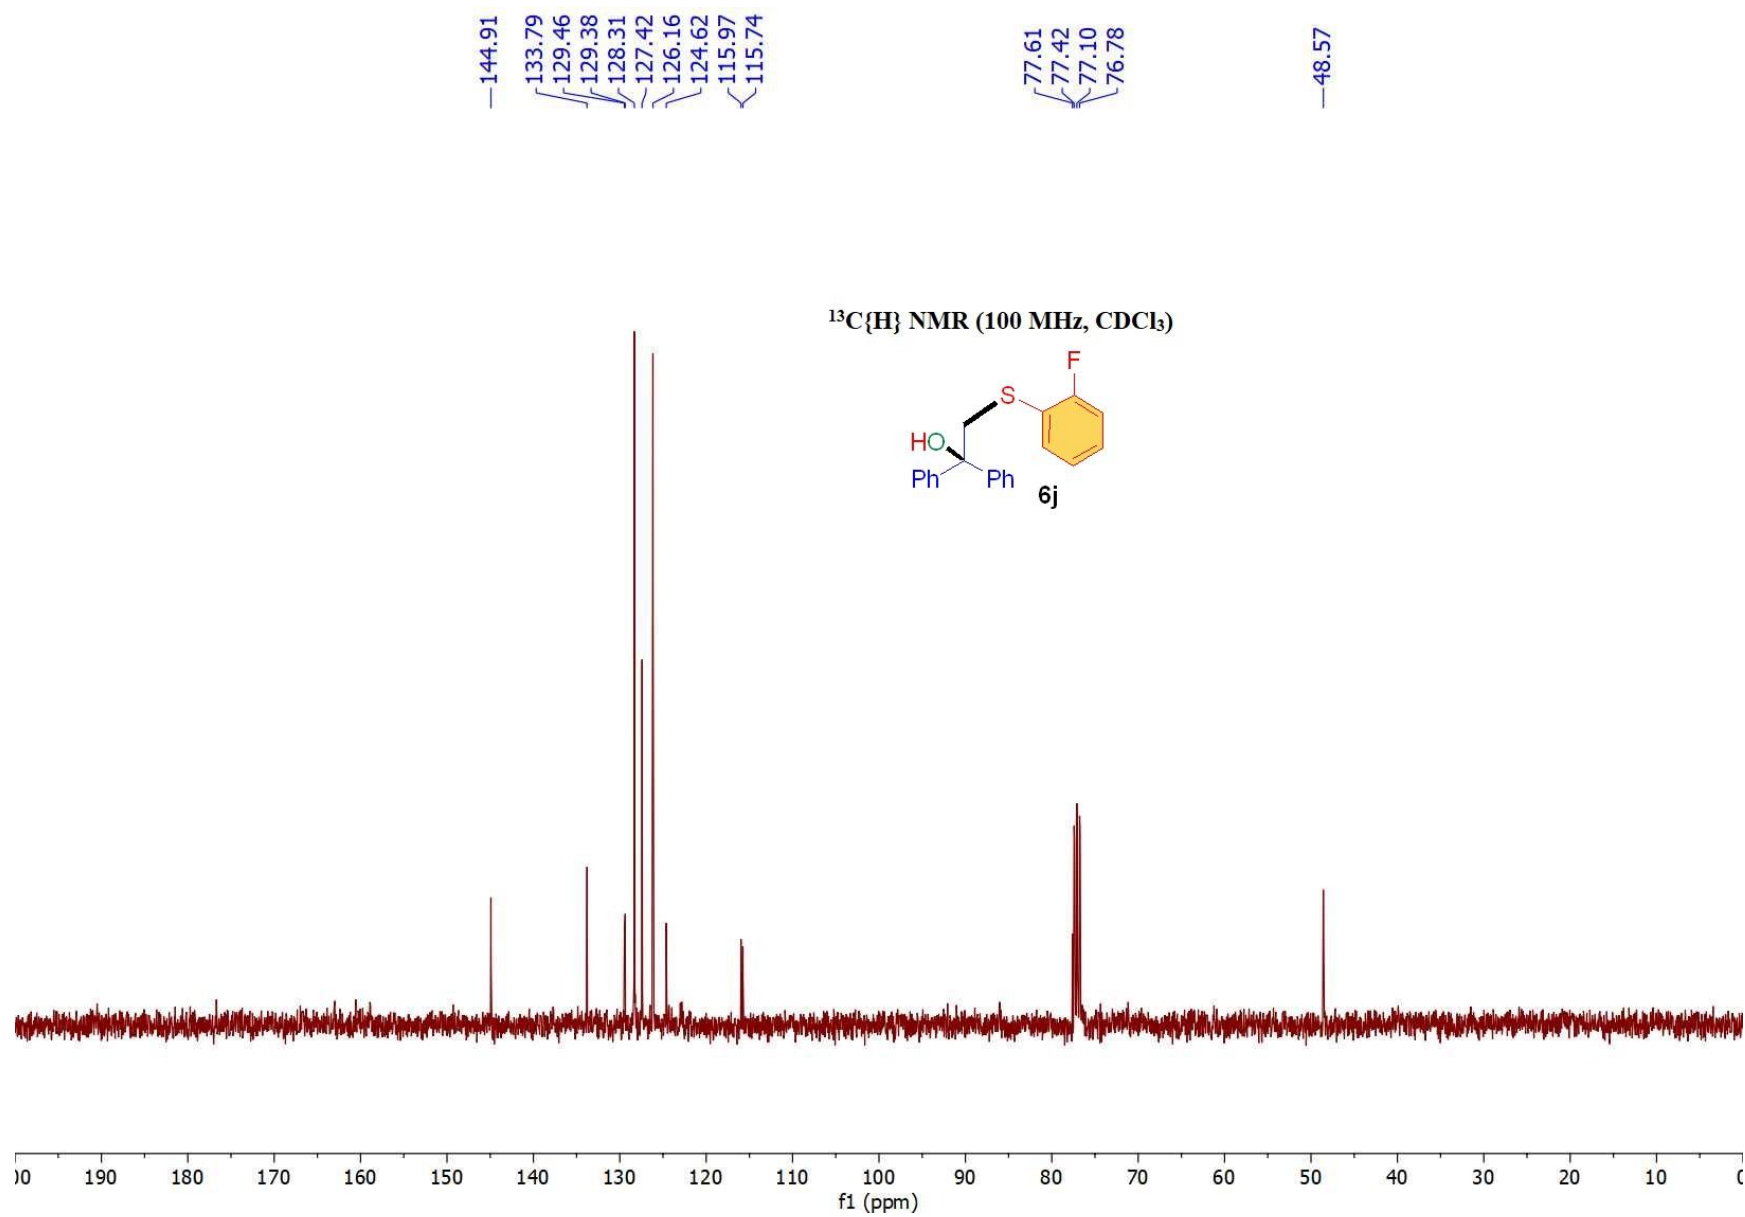

1223-2-floro

107.73

$^{19}\text{F}$  NMR (376 MHz,  $\text{CDCl}_3$ )

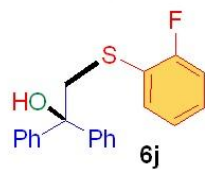

6j

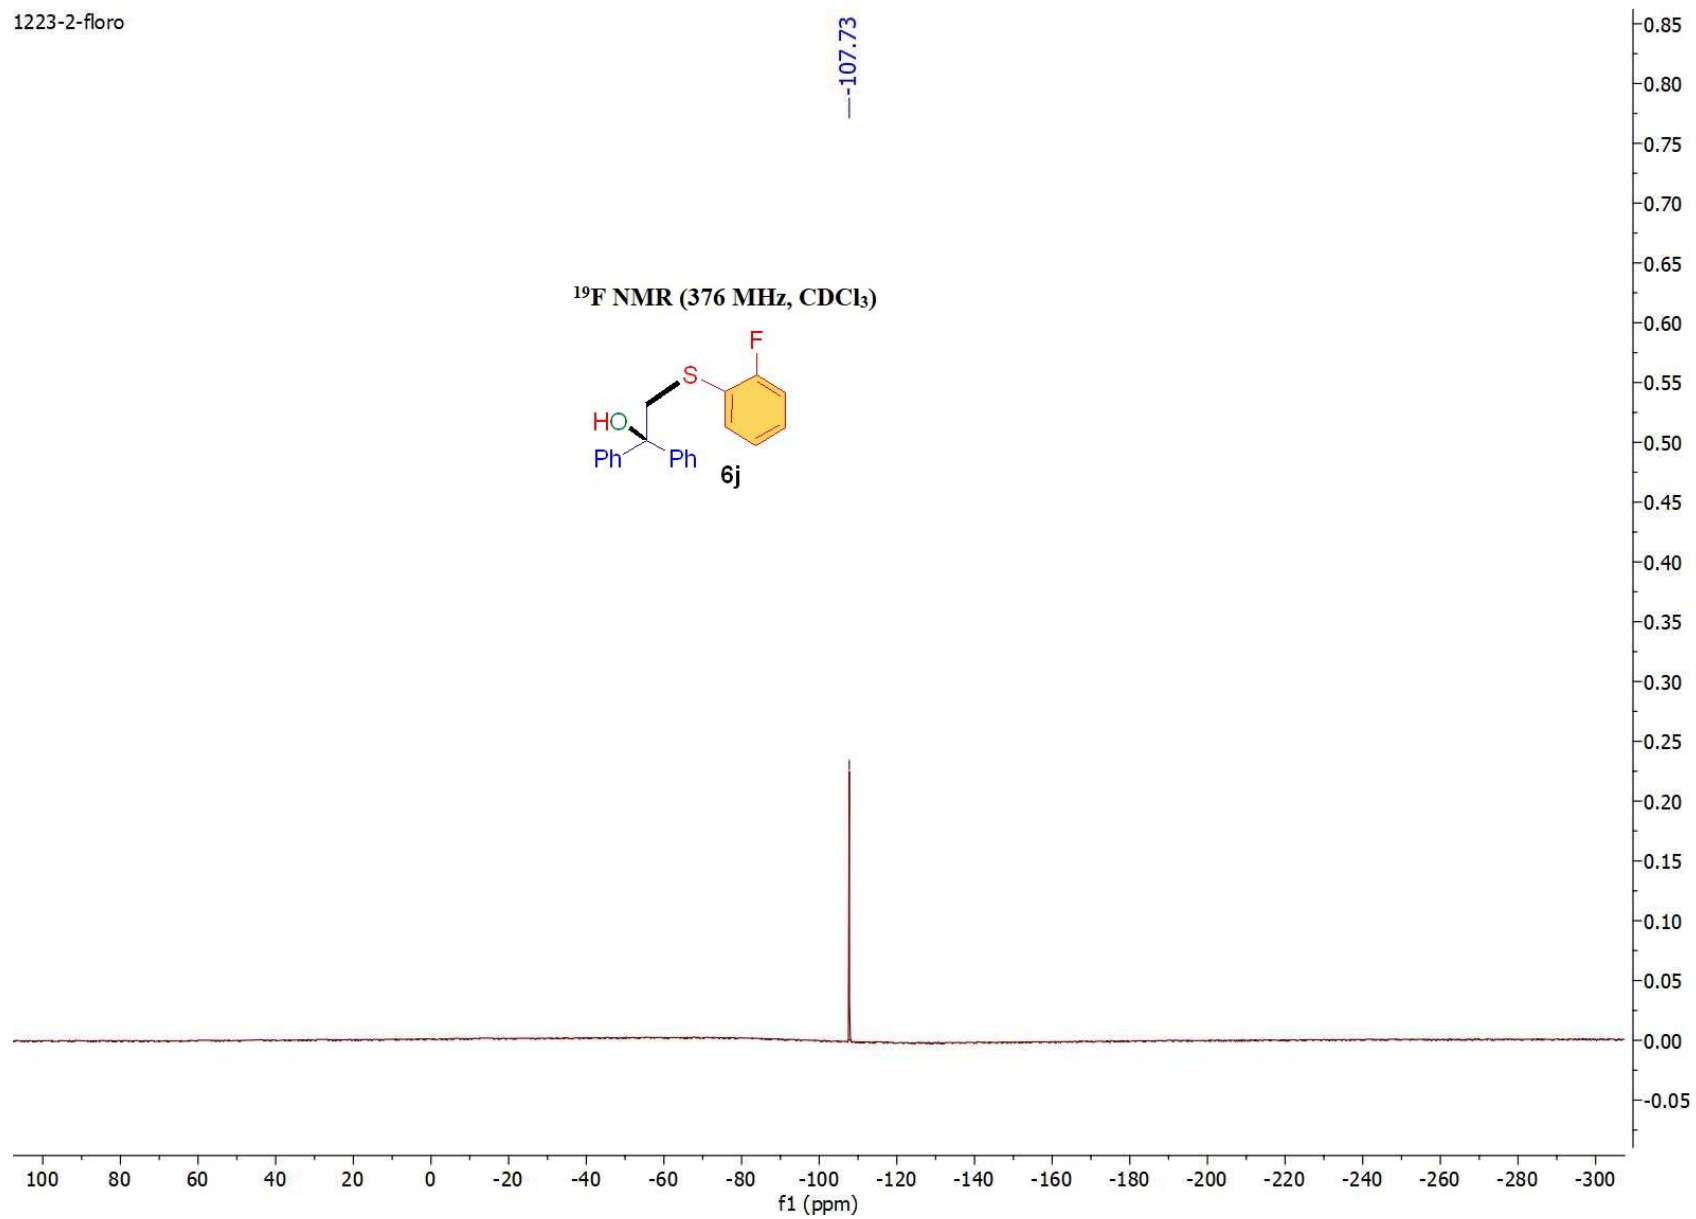

S101

0211-21-11#1-10 11.00-0.15 AV. 10 NL. 3.05E9  
FTMS + p ESI Full ms [200.00-2000.00]

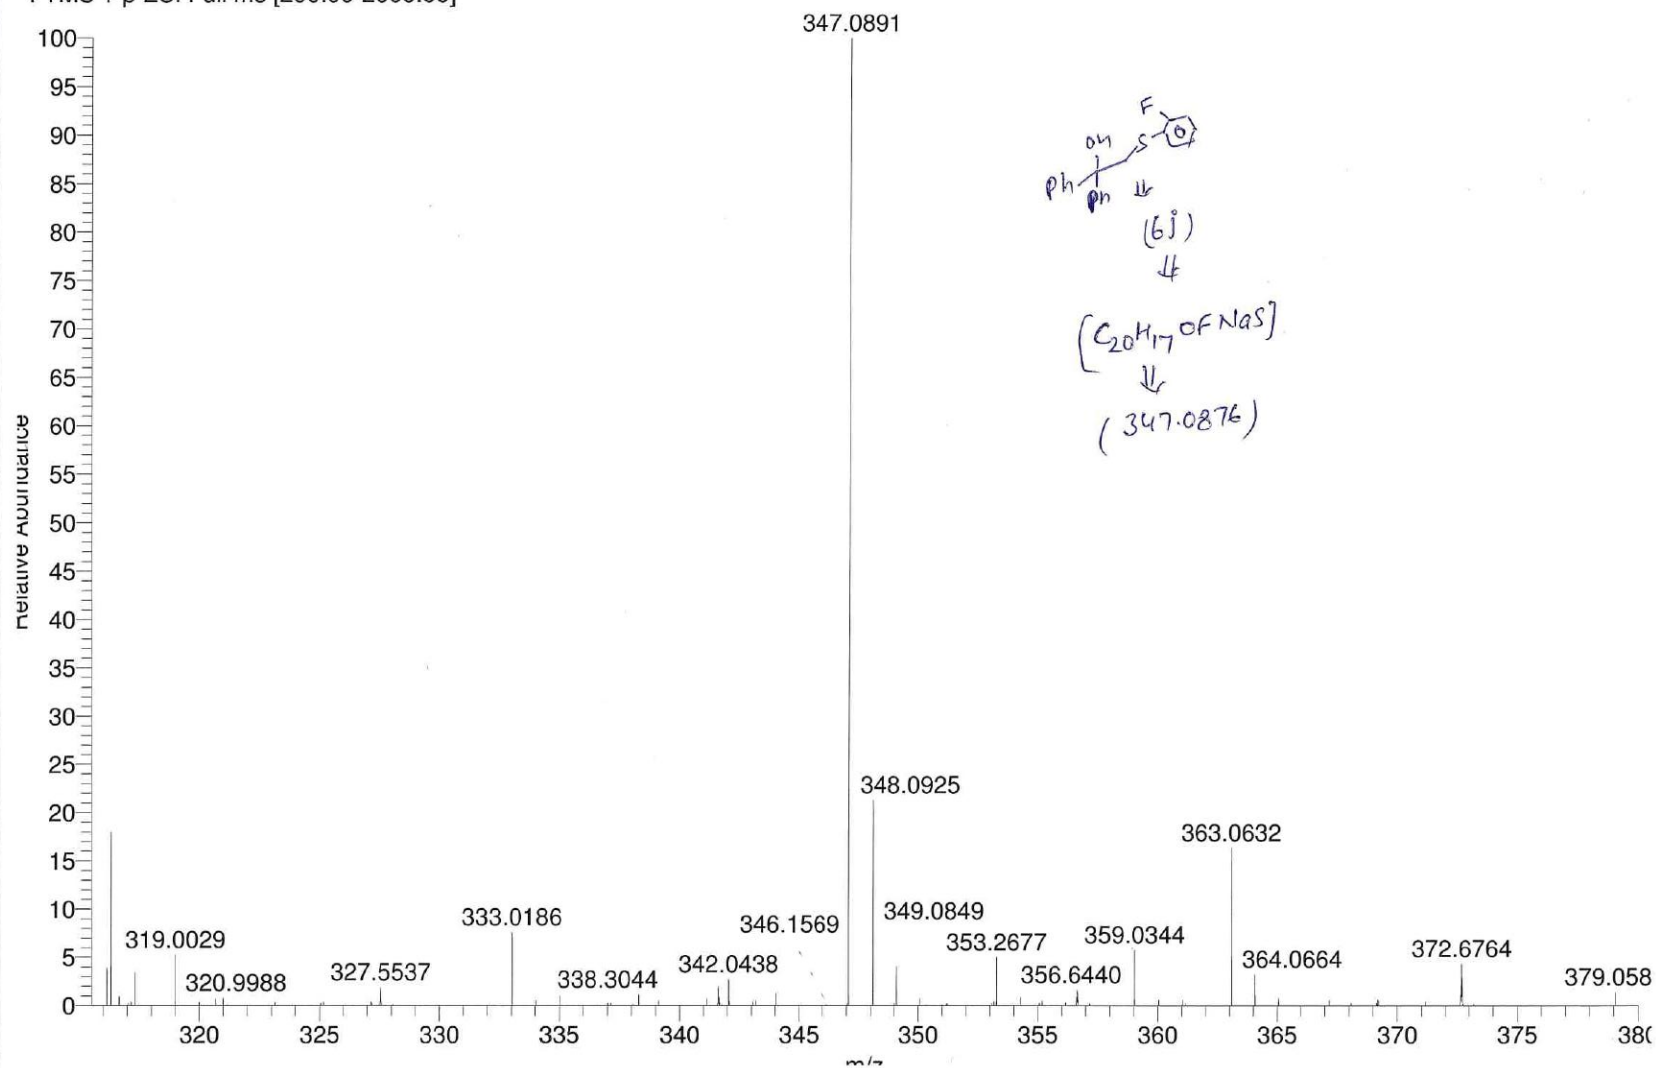

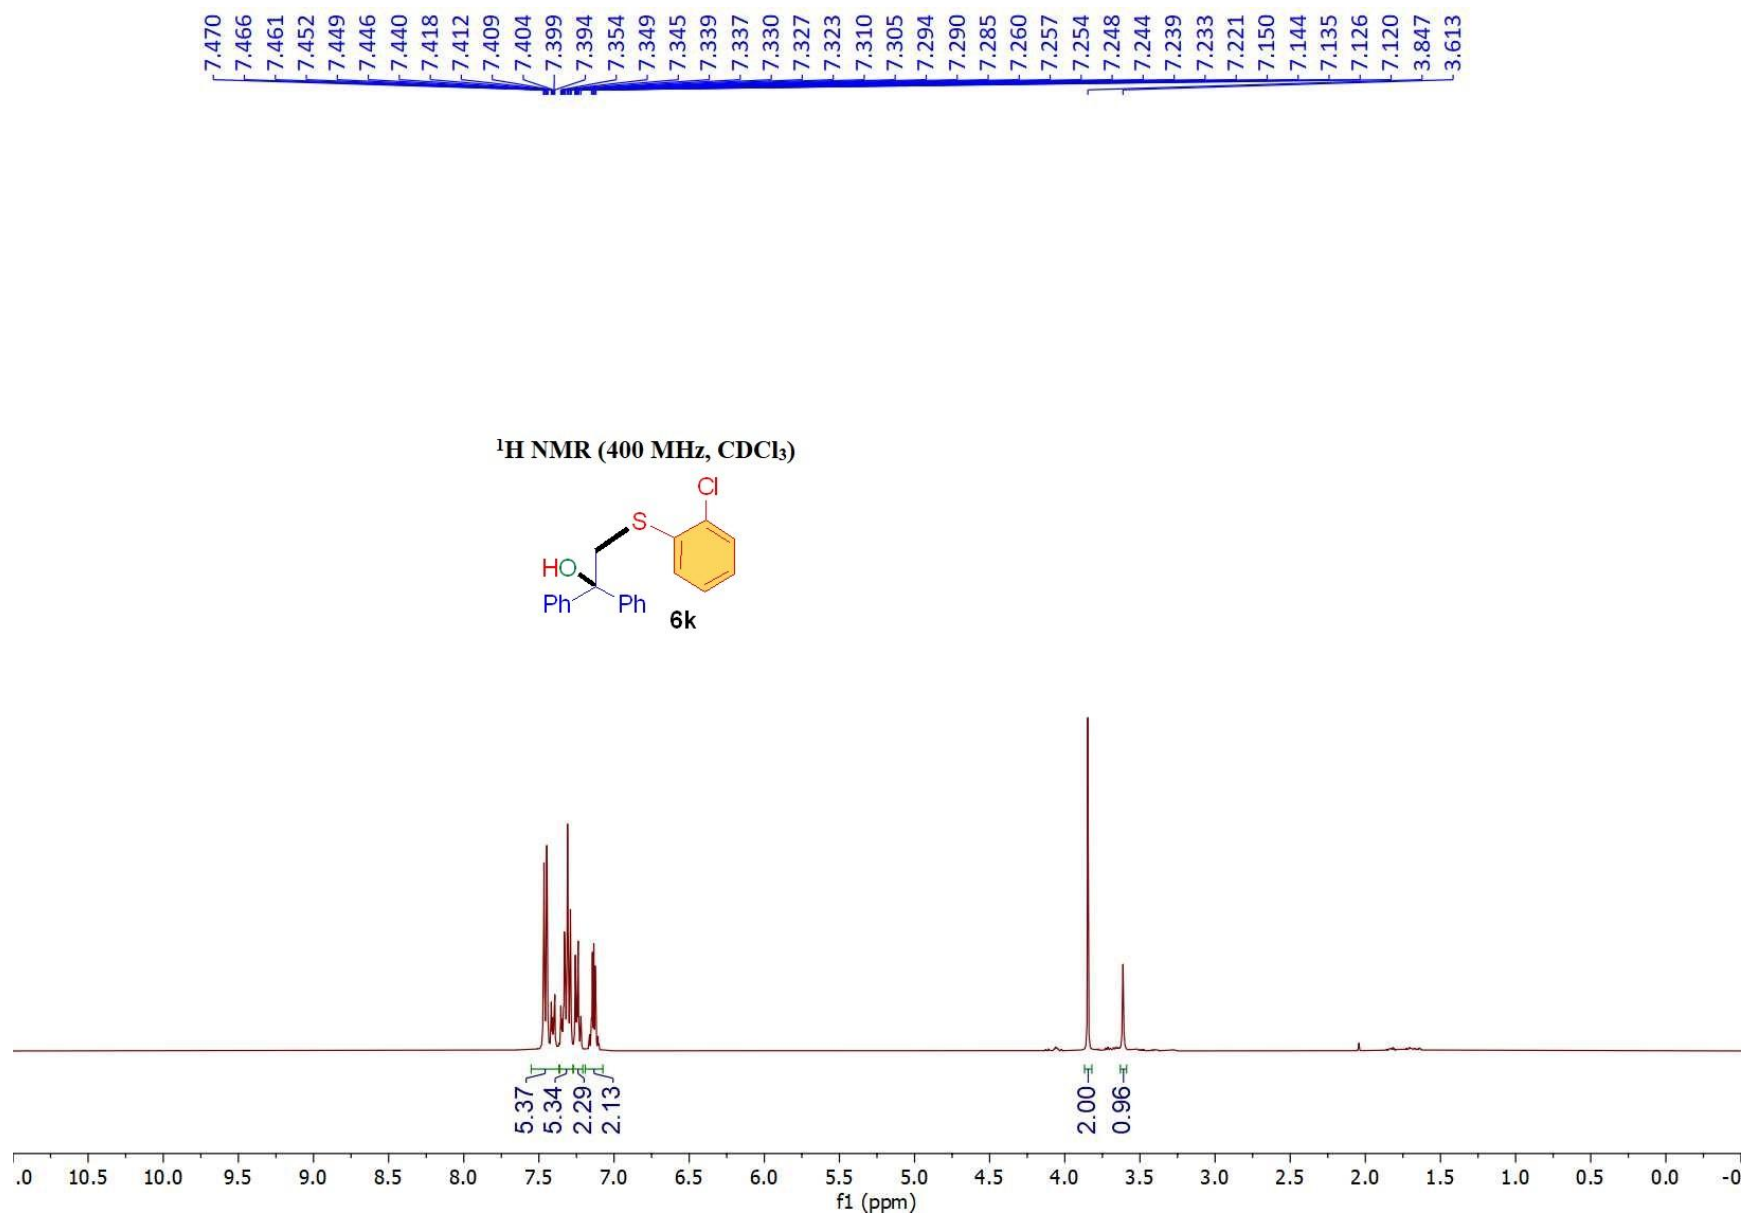

144.99  
135.30  
135.22  
131.66  
129.83  
128.35  
127.91  
127.47  
127.30  
126.16

77.66  
77.42  
77.10  
76.78

47.92

$^{13}\text{C}\{\text{H}\}$  NMR (100 MHz,  $\text{CDCl}_3$ )

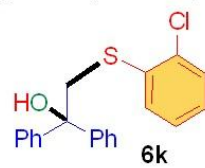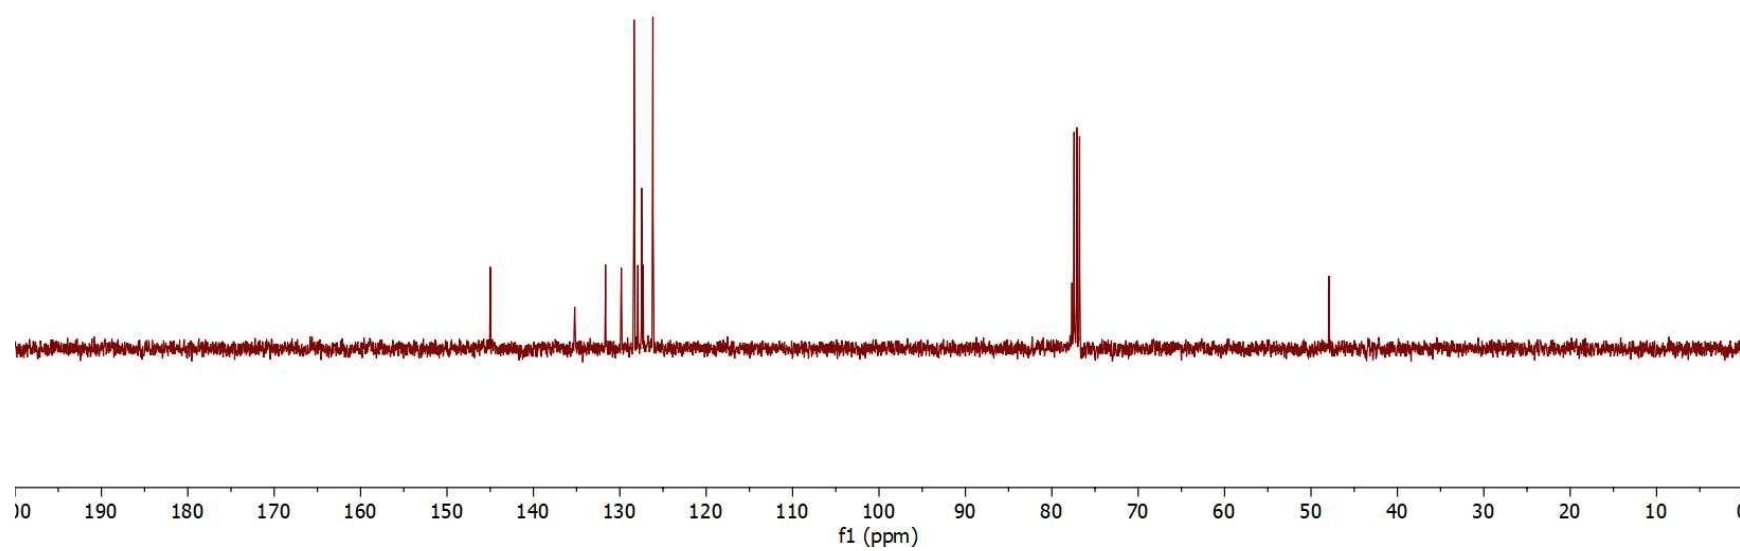

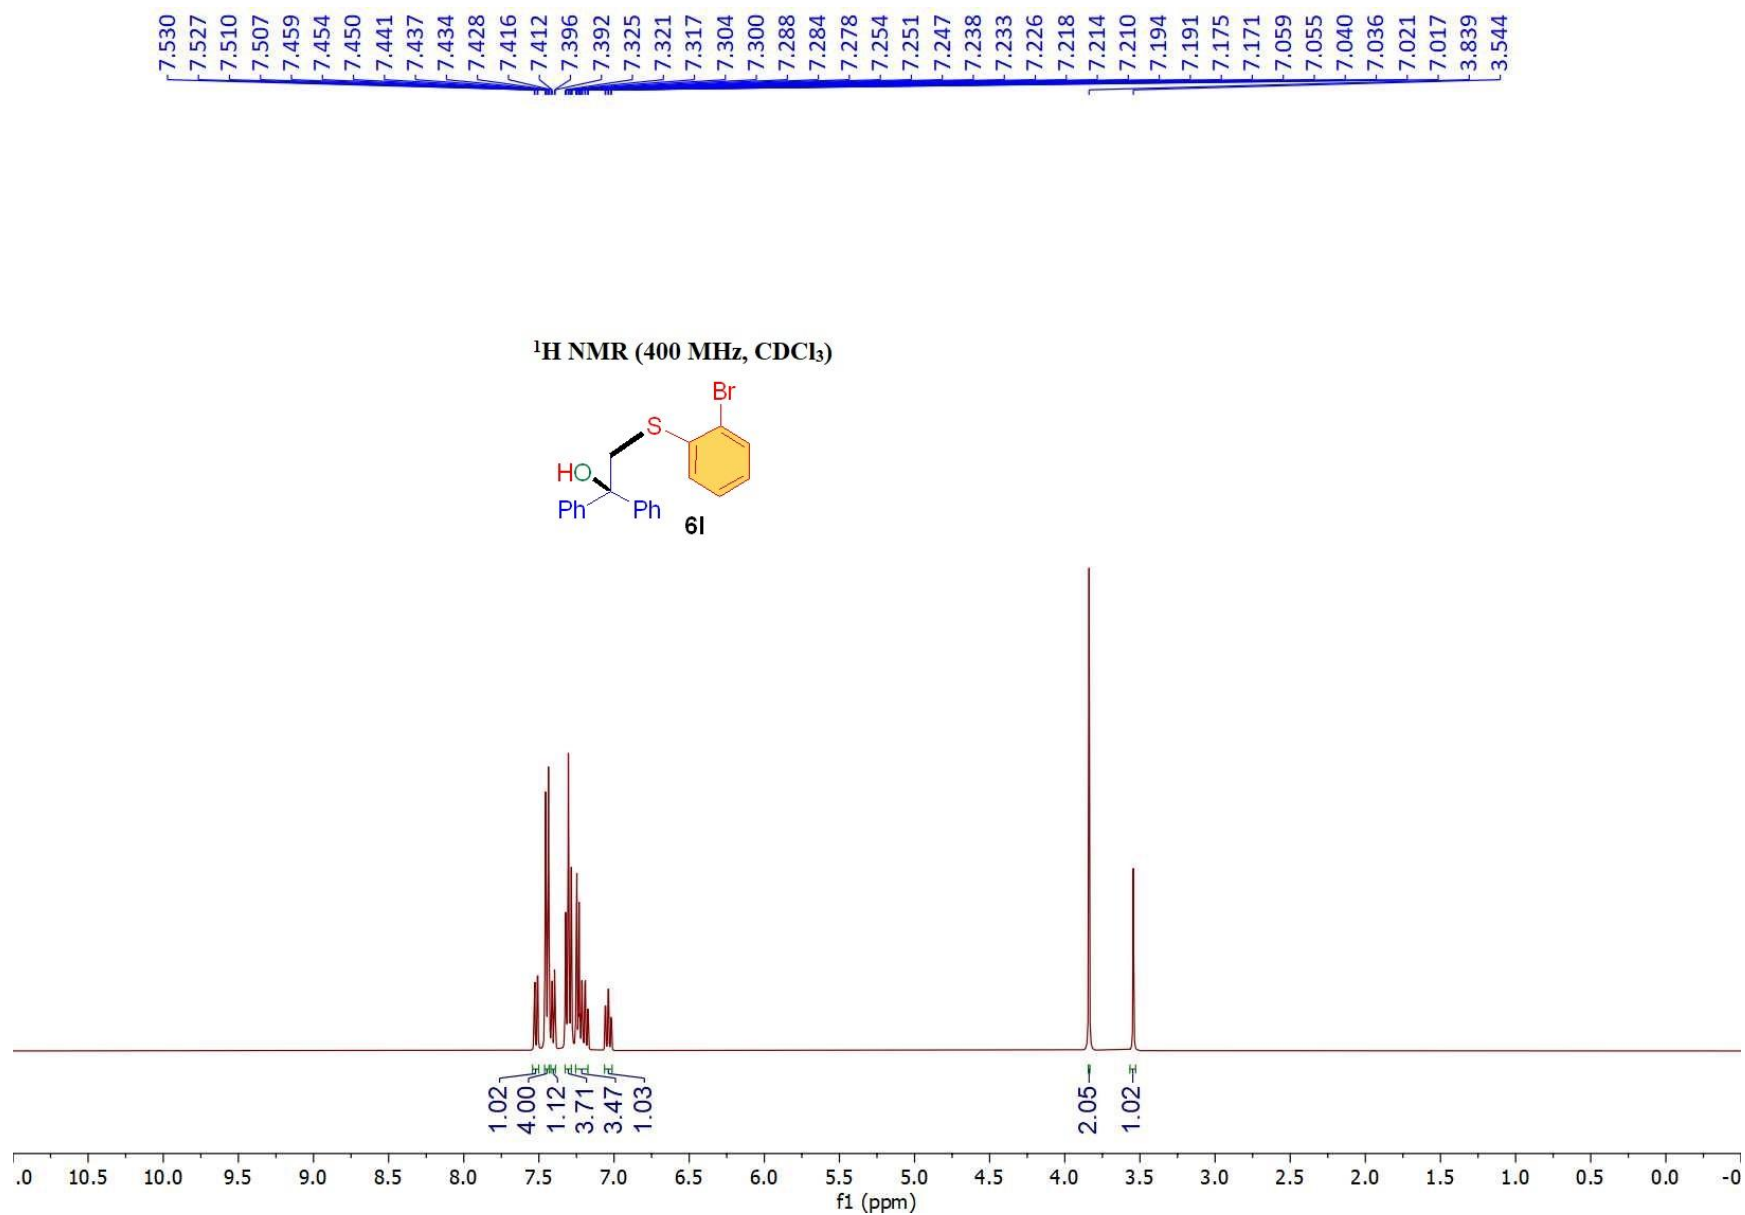

145.03  
133.16  
131.54  
128.39  
128.04  
127.98  
127.52  
126.20  
125.83

77.71  
77.42  
77.10  
76.78

48.40

$^{13}\text{C}\{\text{H}\}$  NMR (100 MHz,  $\text{CDCl}_3$ )

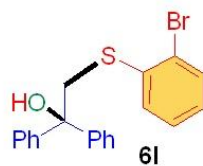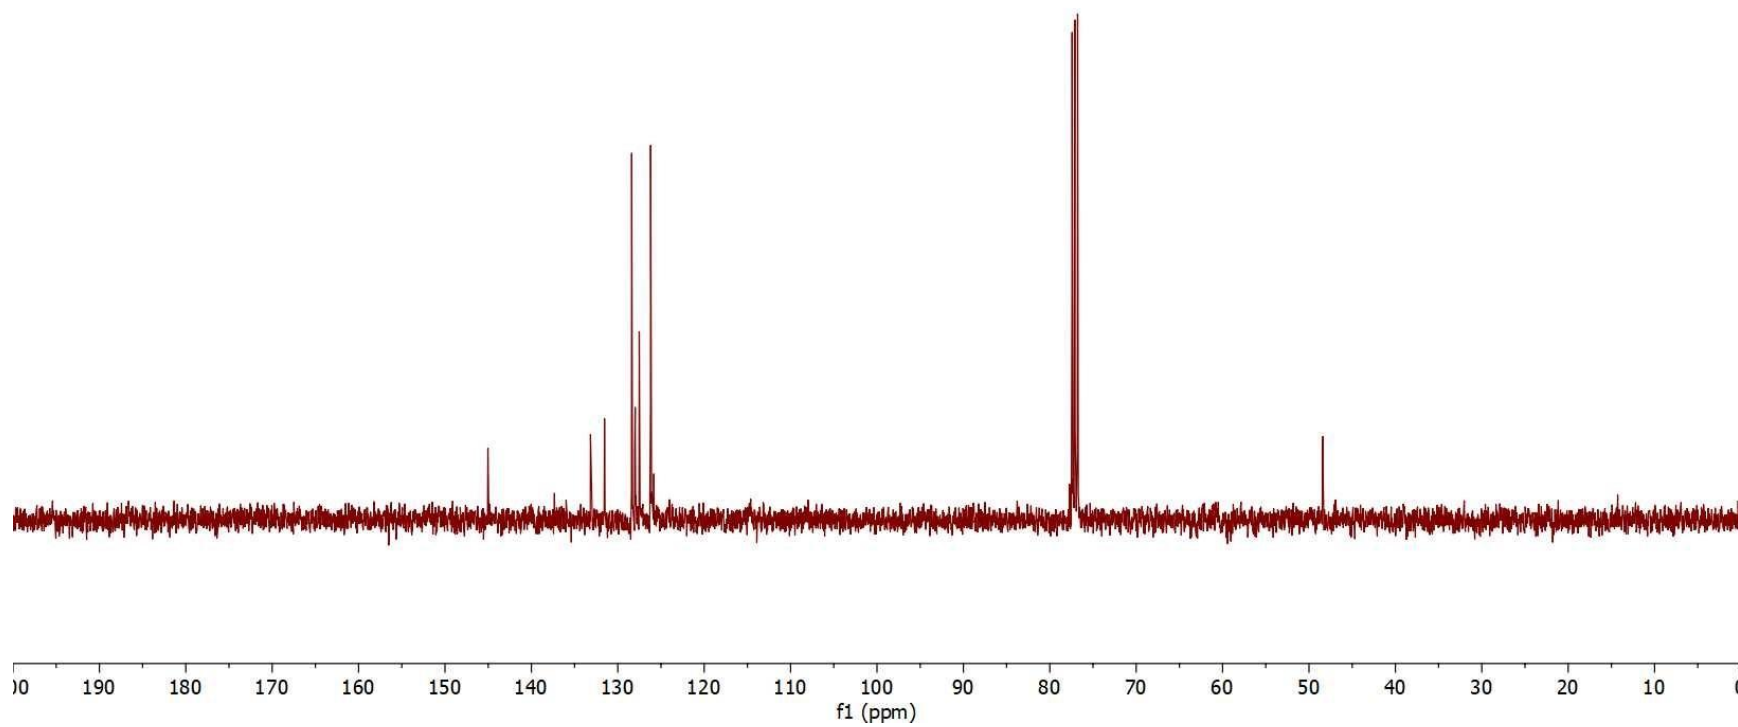

SPEC: lei1592\_1208-2-br 10-Dec-24 Elapse: 03:31.3 99  
 Samp: Start : 15:32:13 520  
 Mode: EI +VE +LMR BSCAN (EXP) UP LR NRM  
 Oper: Inlet :  
 Base: 183.1 Inten : 52062976 Masses: 45 > 400  
 Norm: 384.1 RIC : 262255990 #peaks: 463  
 Peak: 5.00 mmu

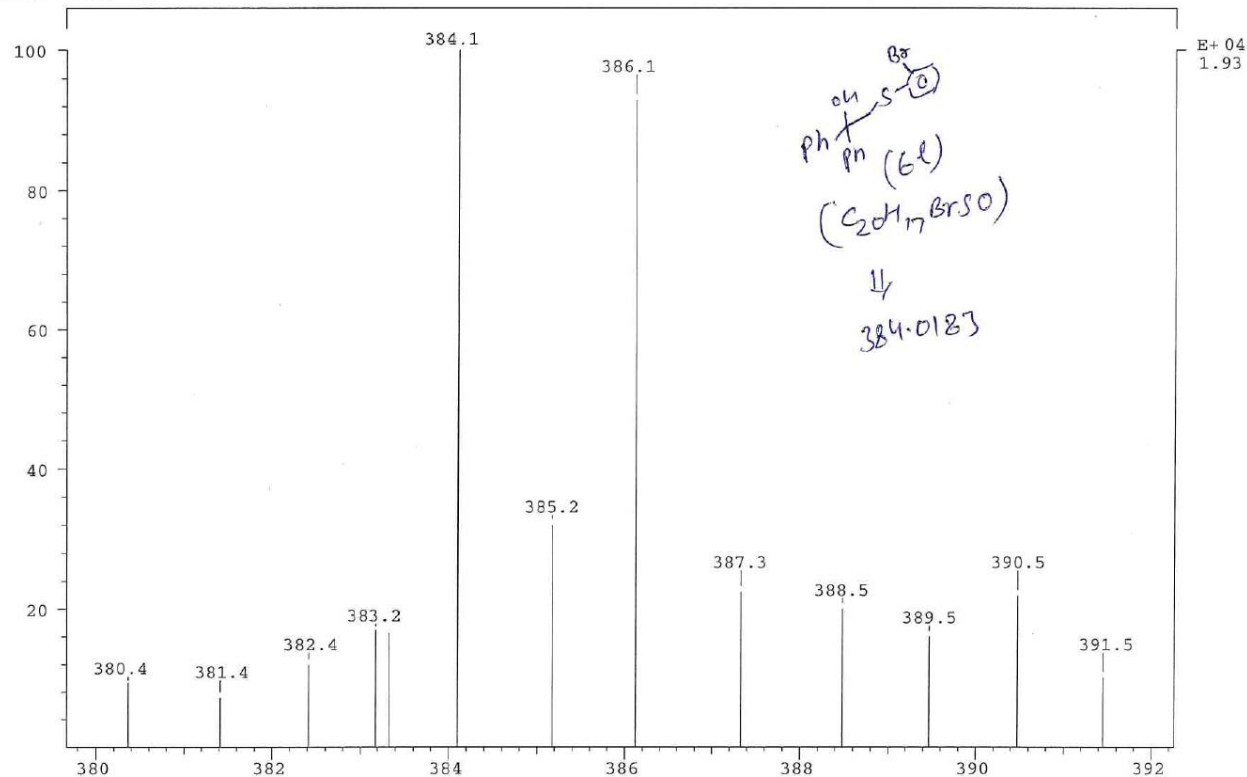

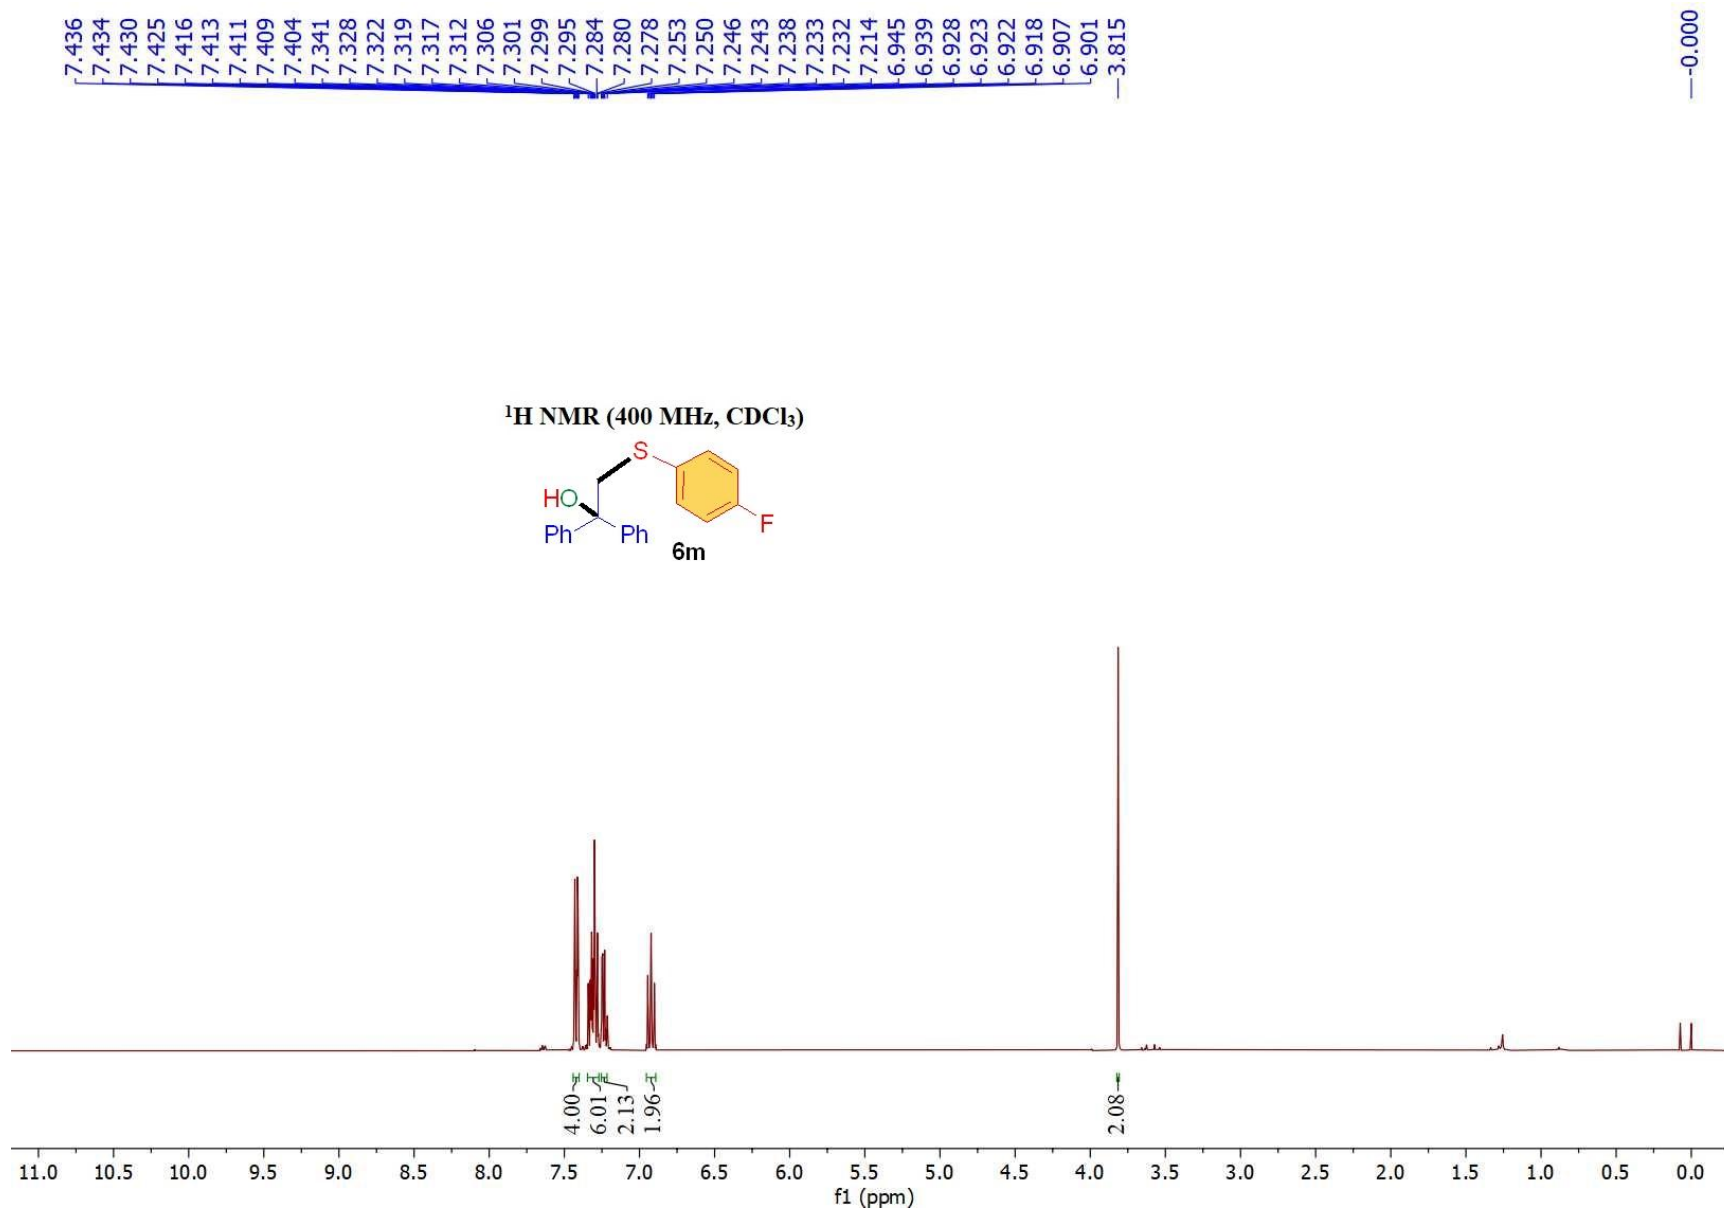

163.29  
160.83

145.08

133.27  
133.19

131.46

128.36

127.47

126.20

116.27  
116.06

77.75  
77.42  
77.10  
76.78

50.31

$^{13}\text{C}\{\text{H}\}$  NMR (100 MHz,  $\text{CDCl}_3$ )

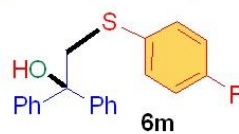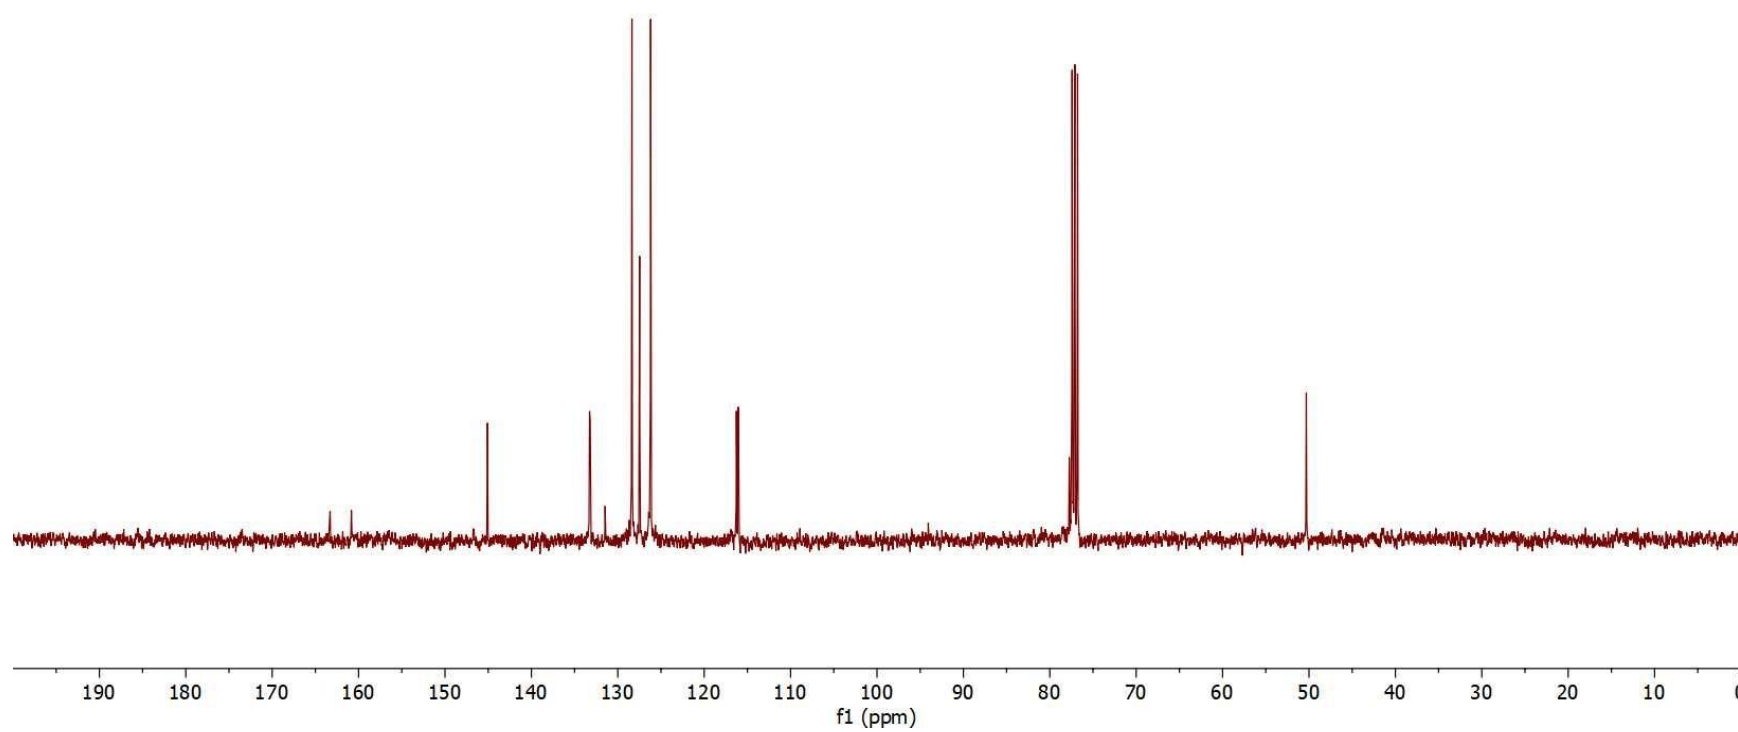

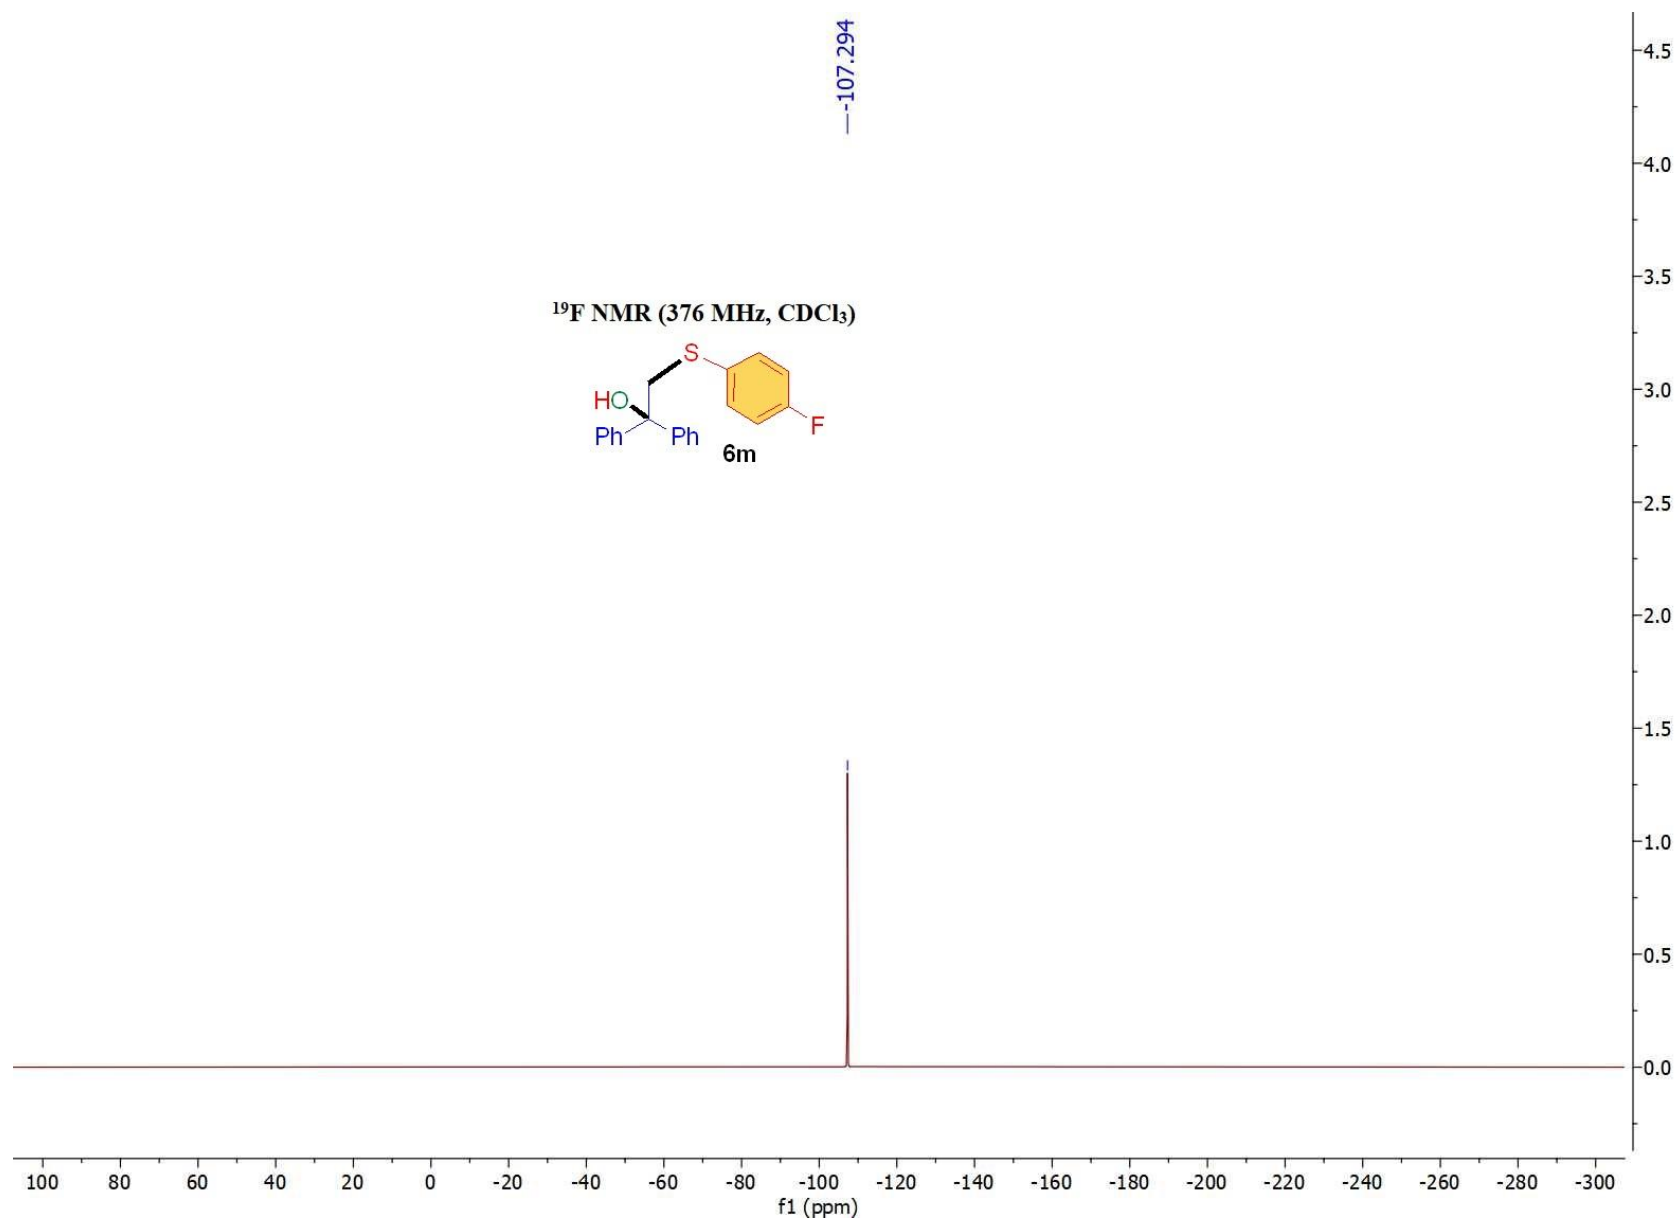

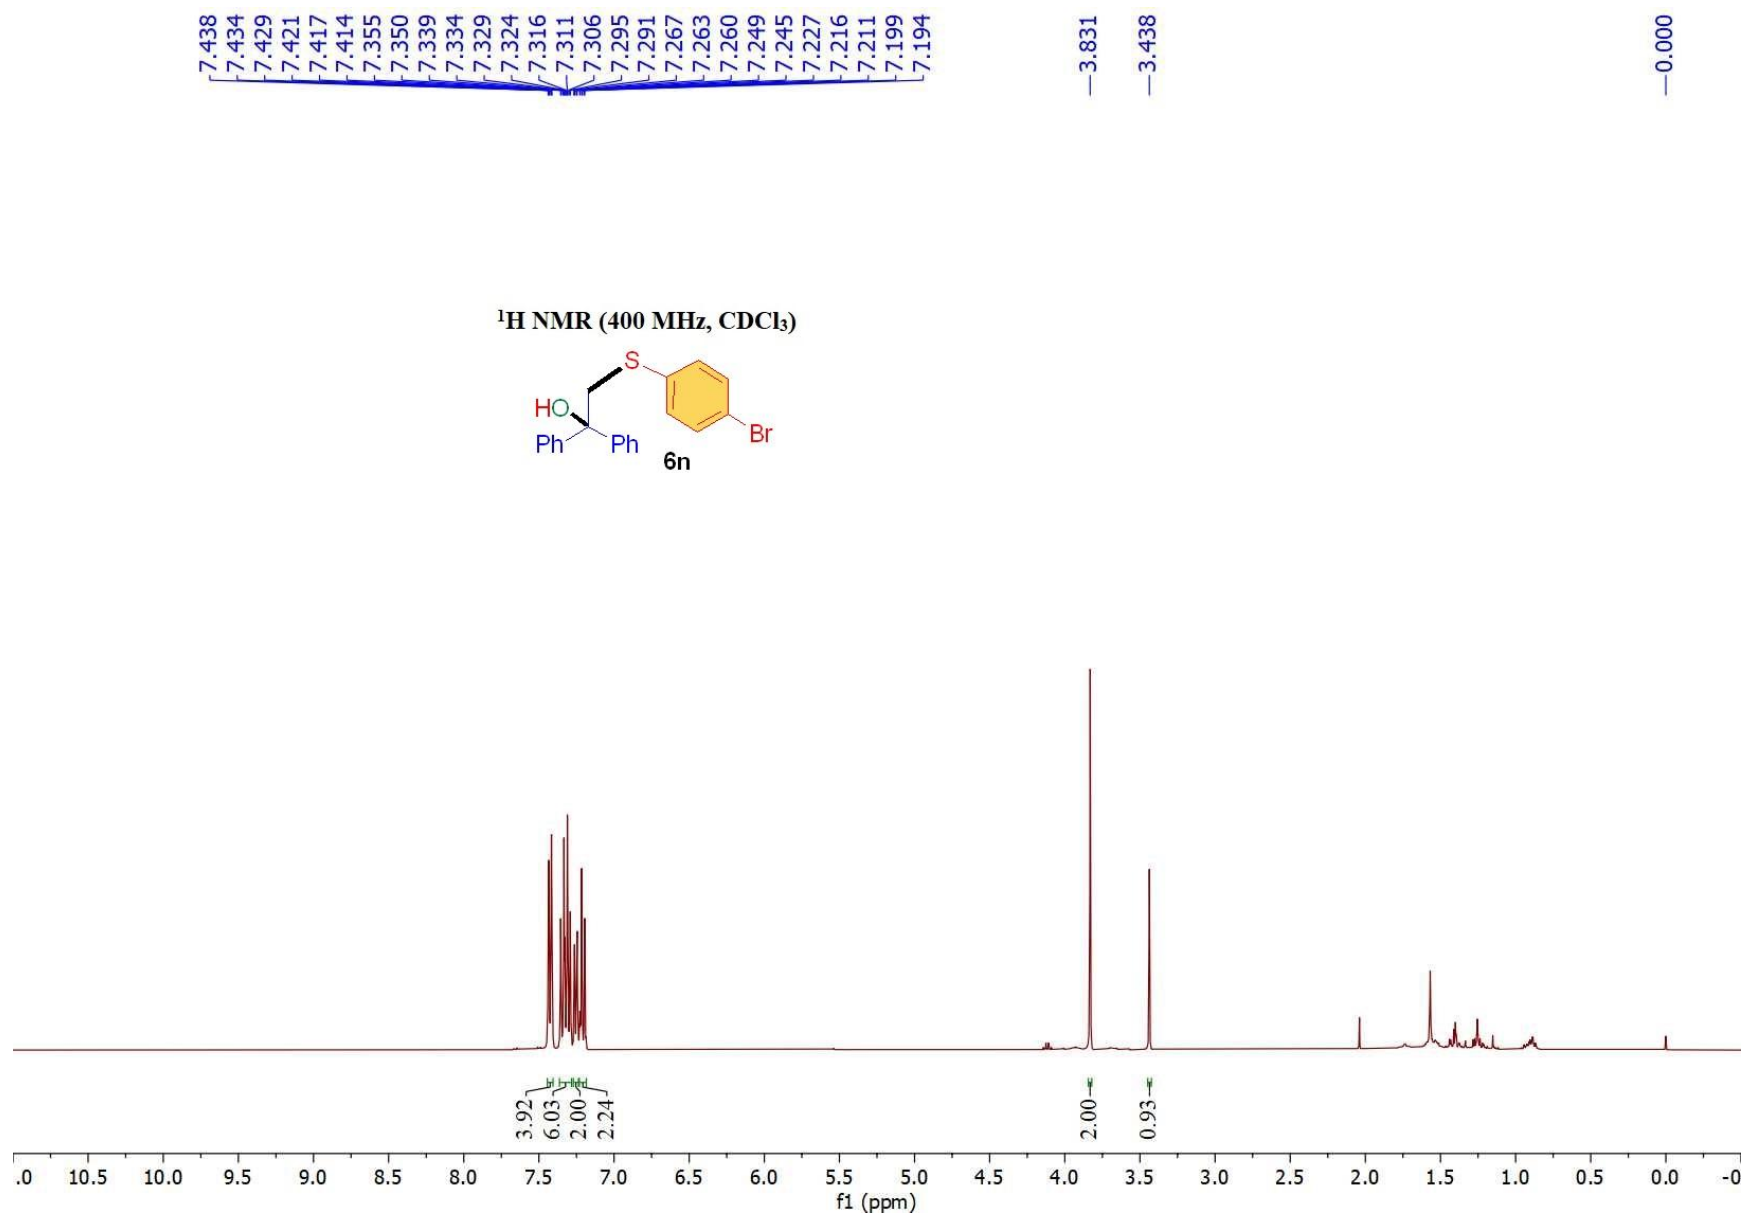

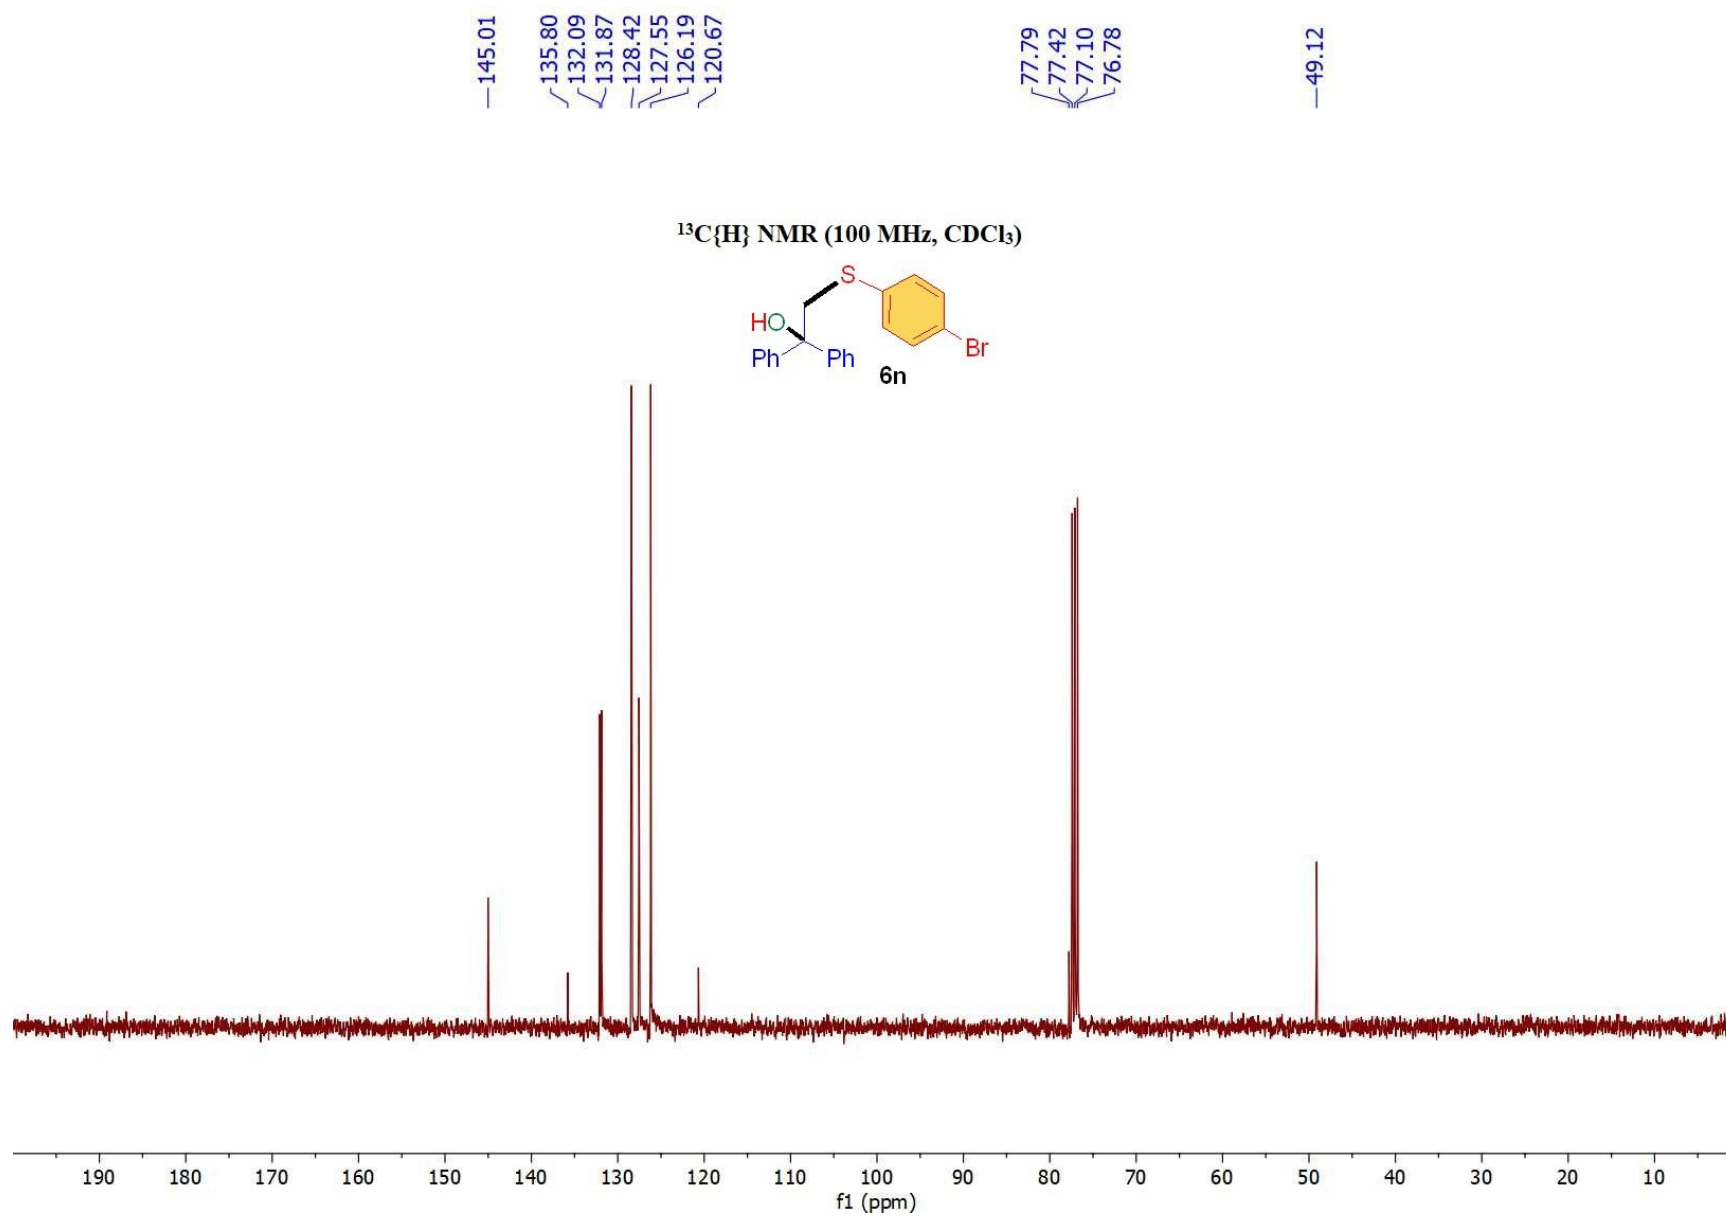

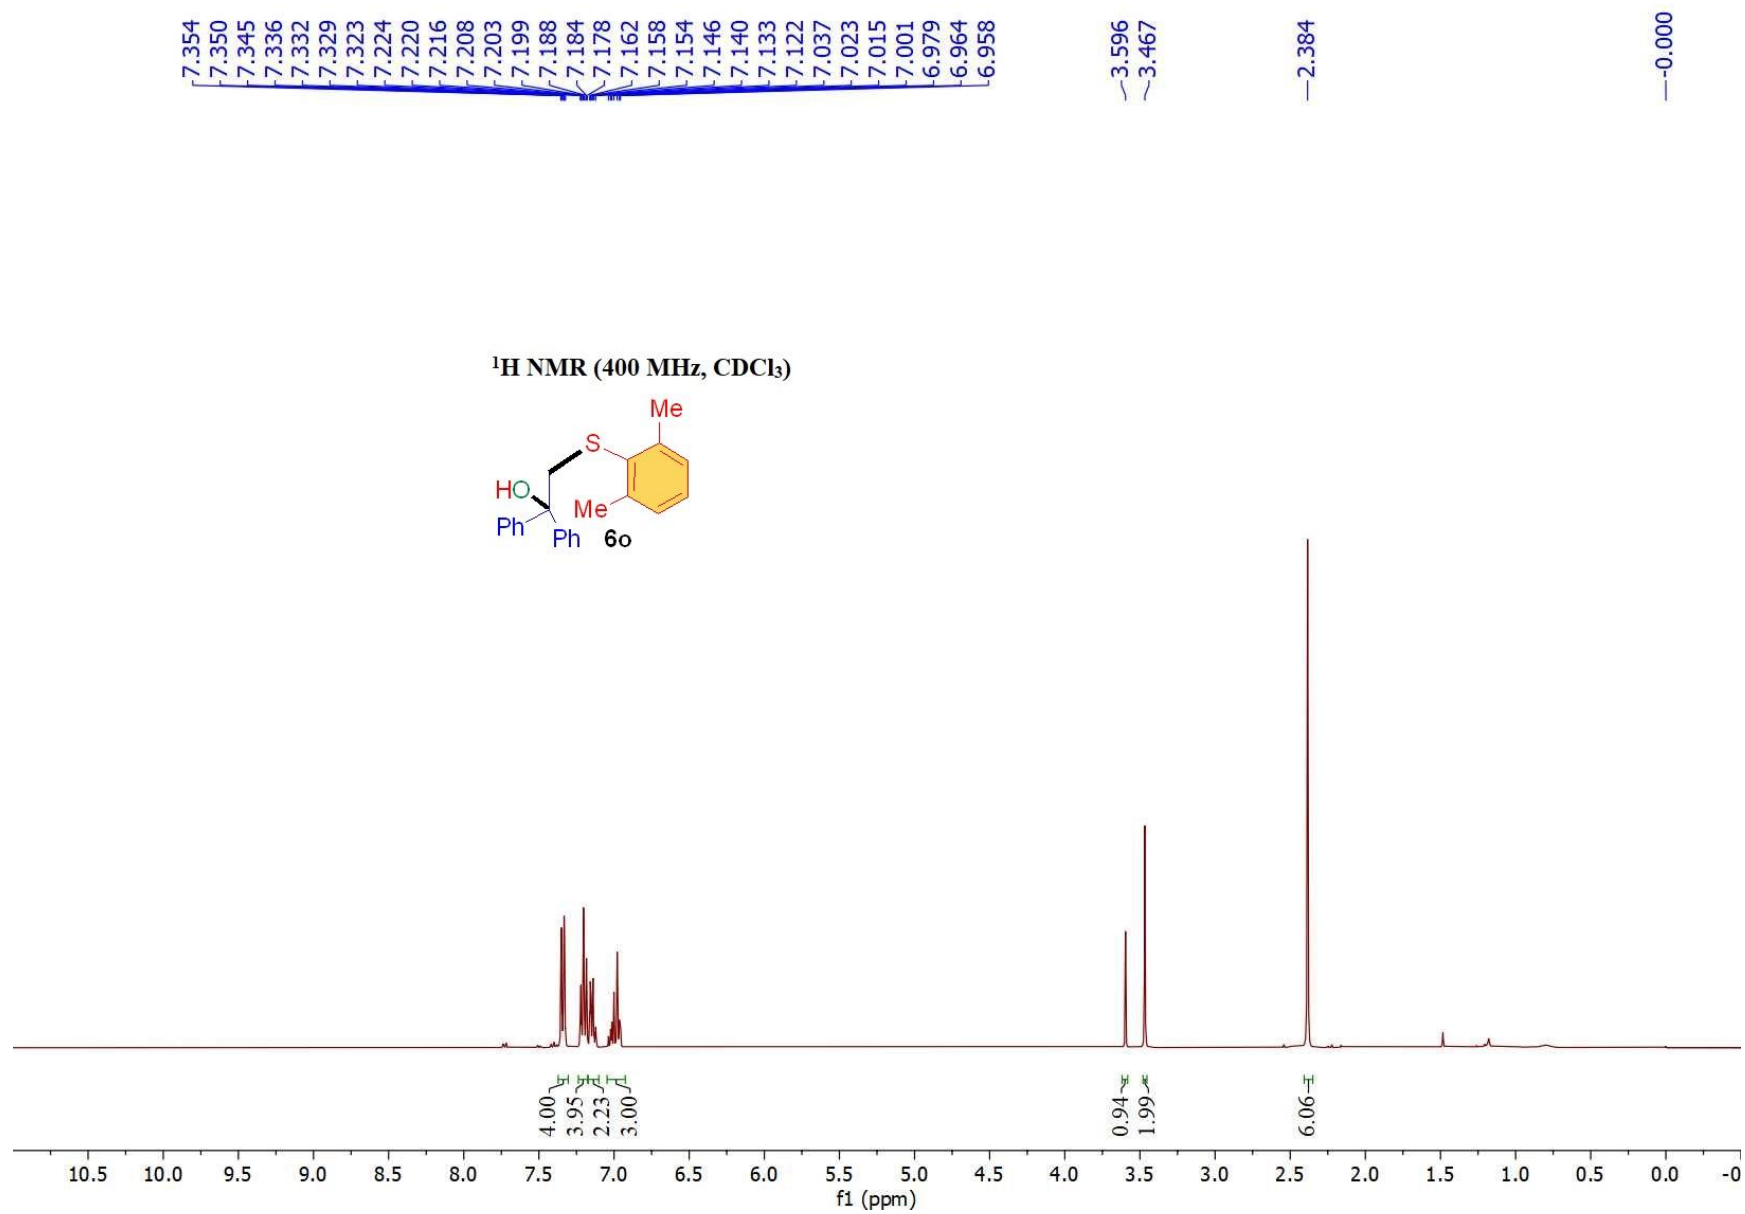

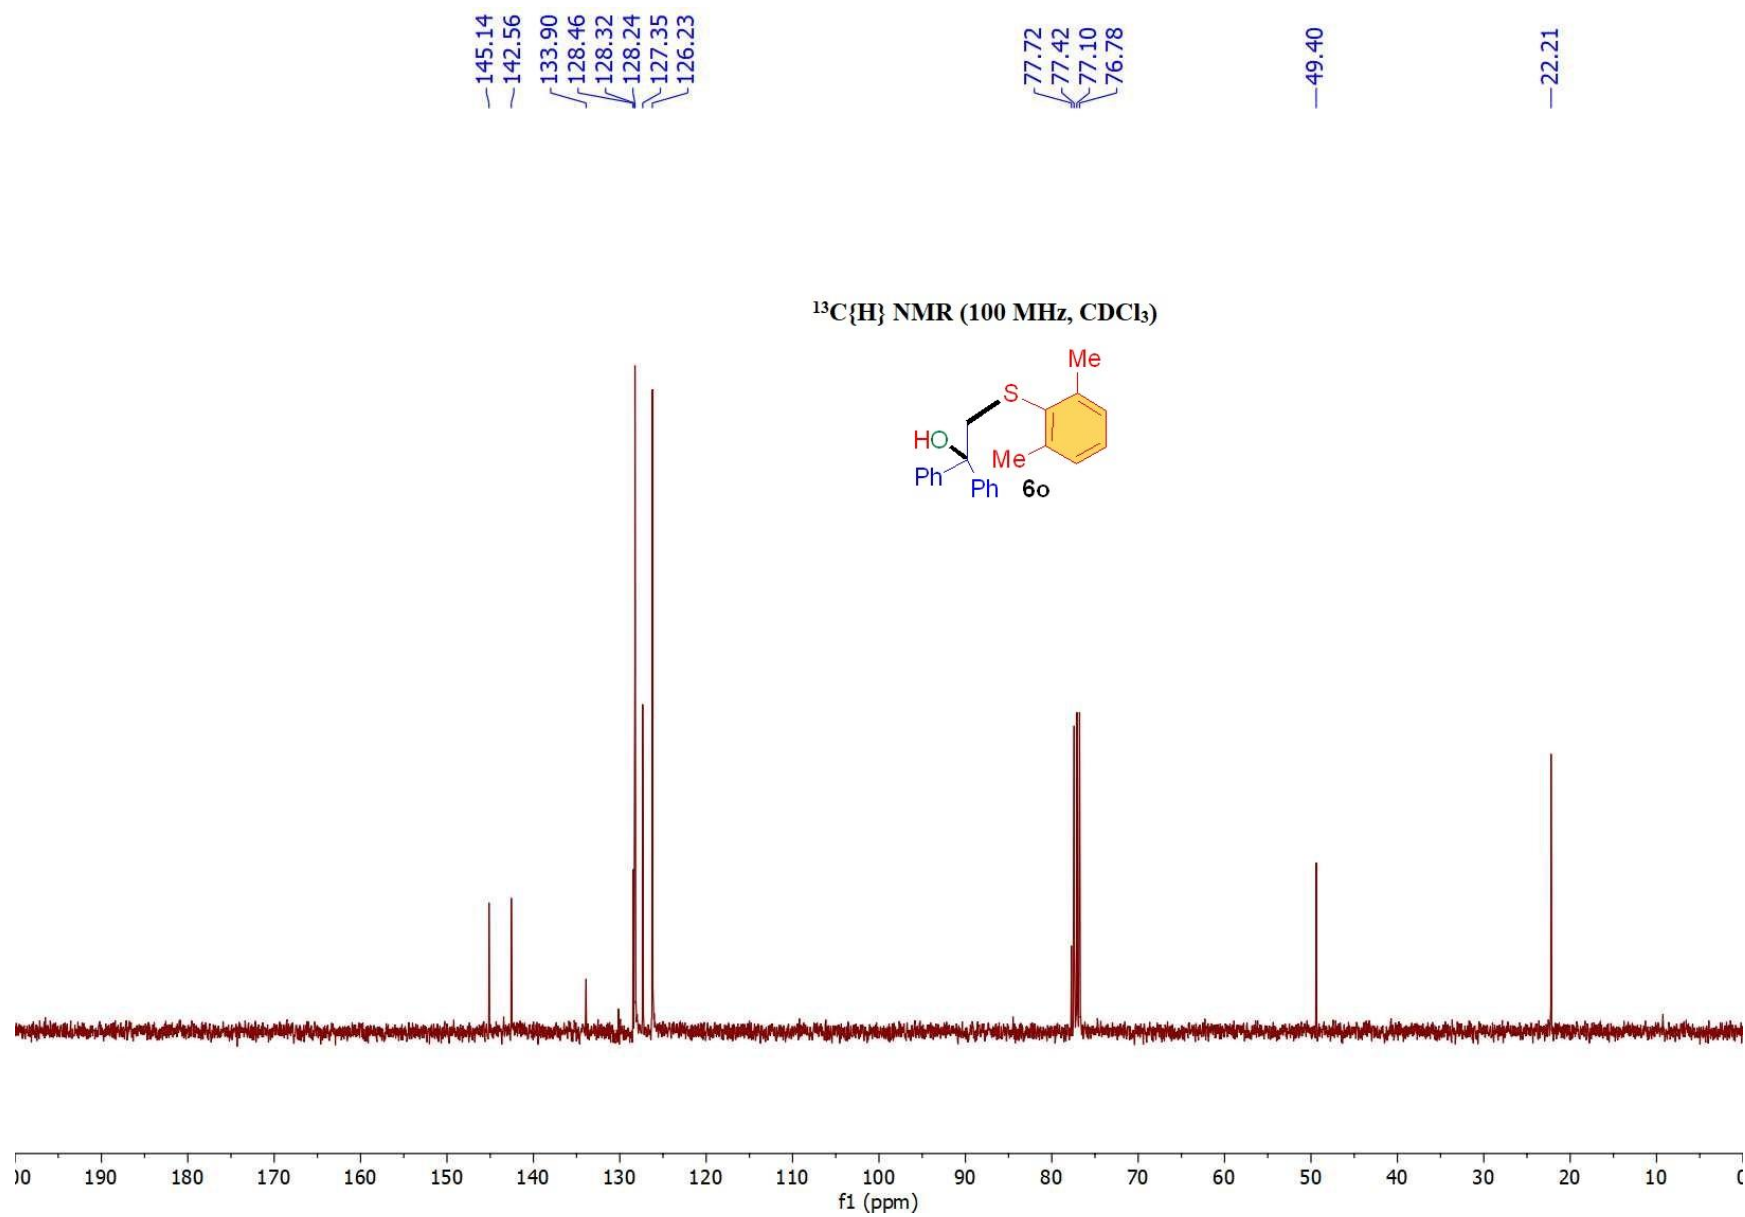

211-2\_5methyl-H #1-10 RT: 0.01-0.26 AV: 10 NL: 2.40E6  
FTMS + p ESI Full ms [200.00-2000.00]

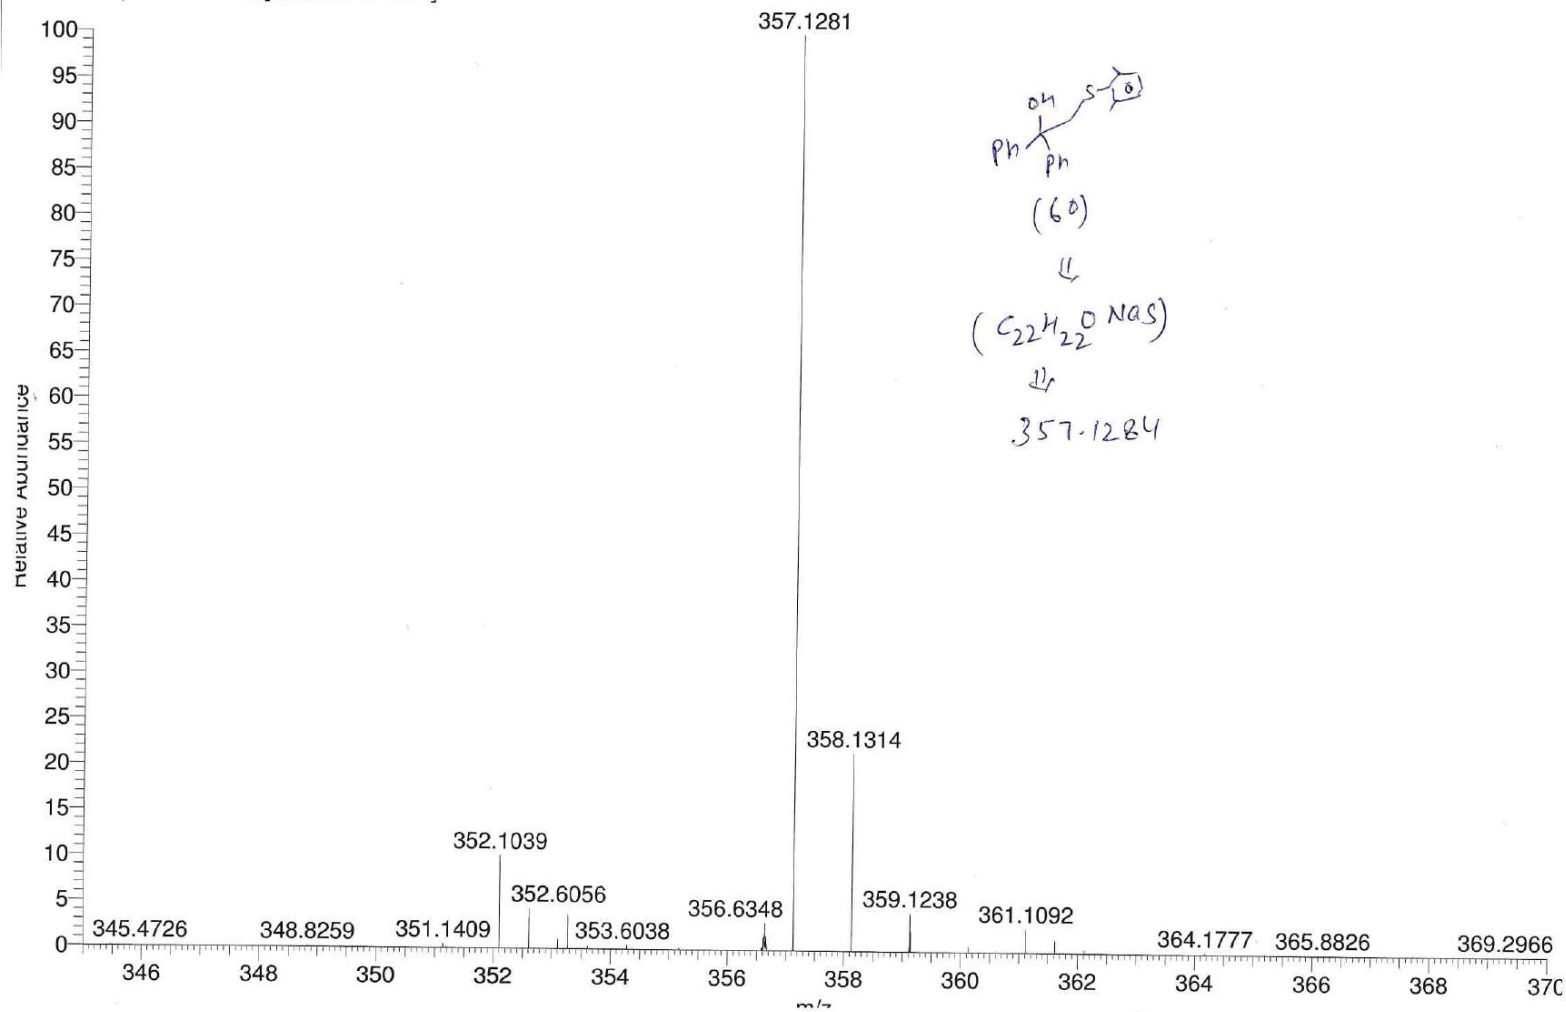

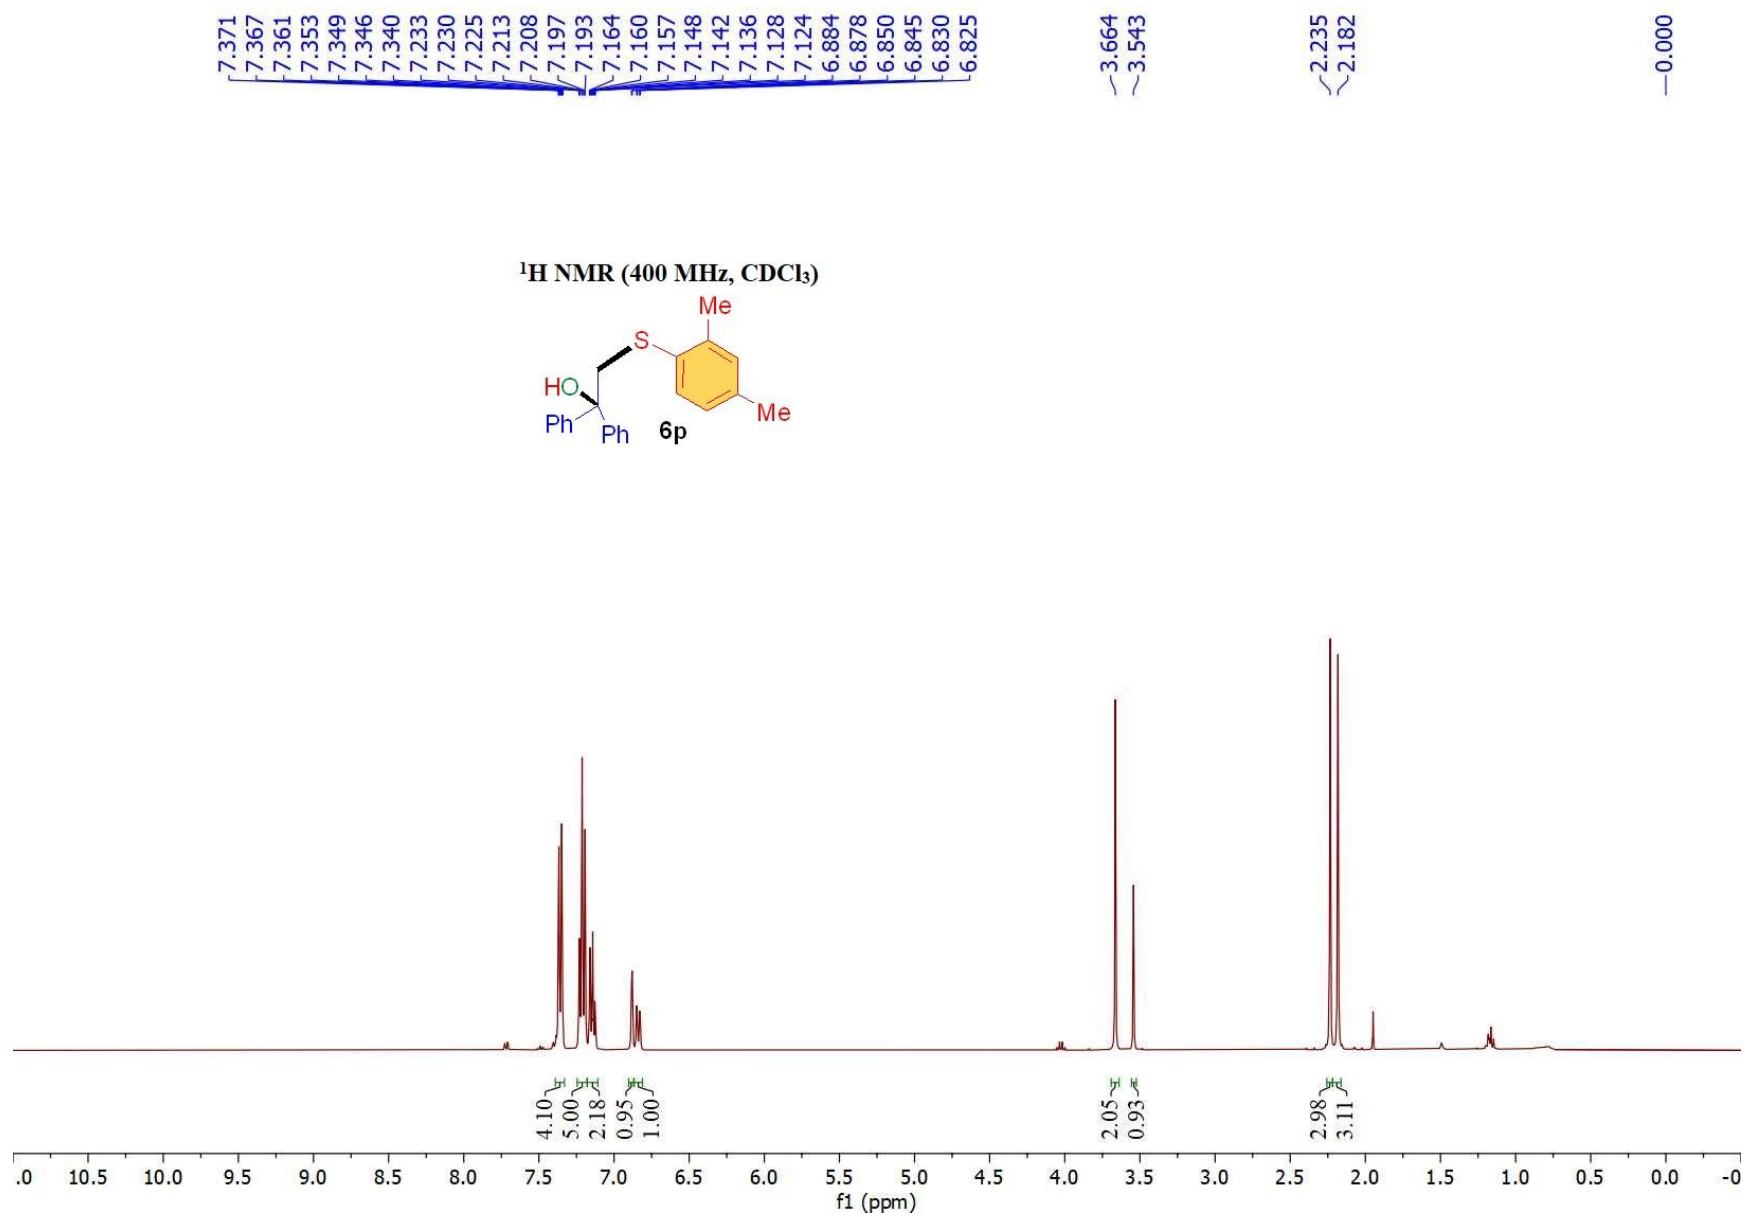

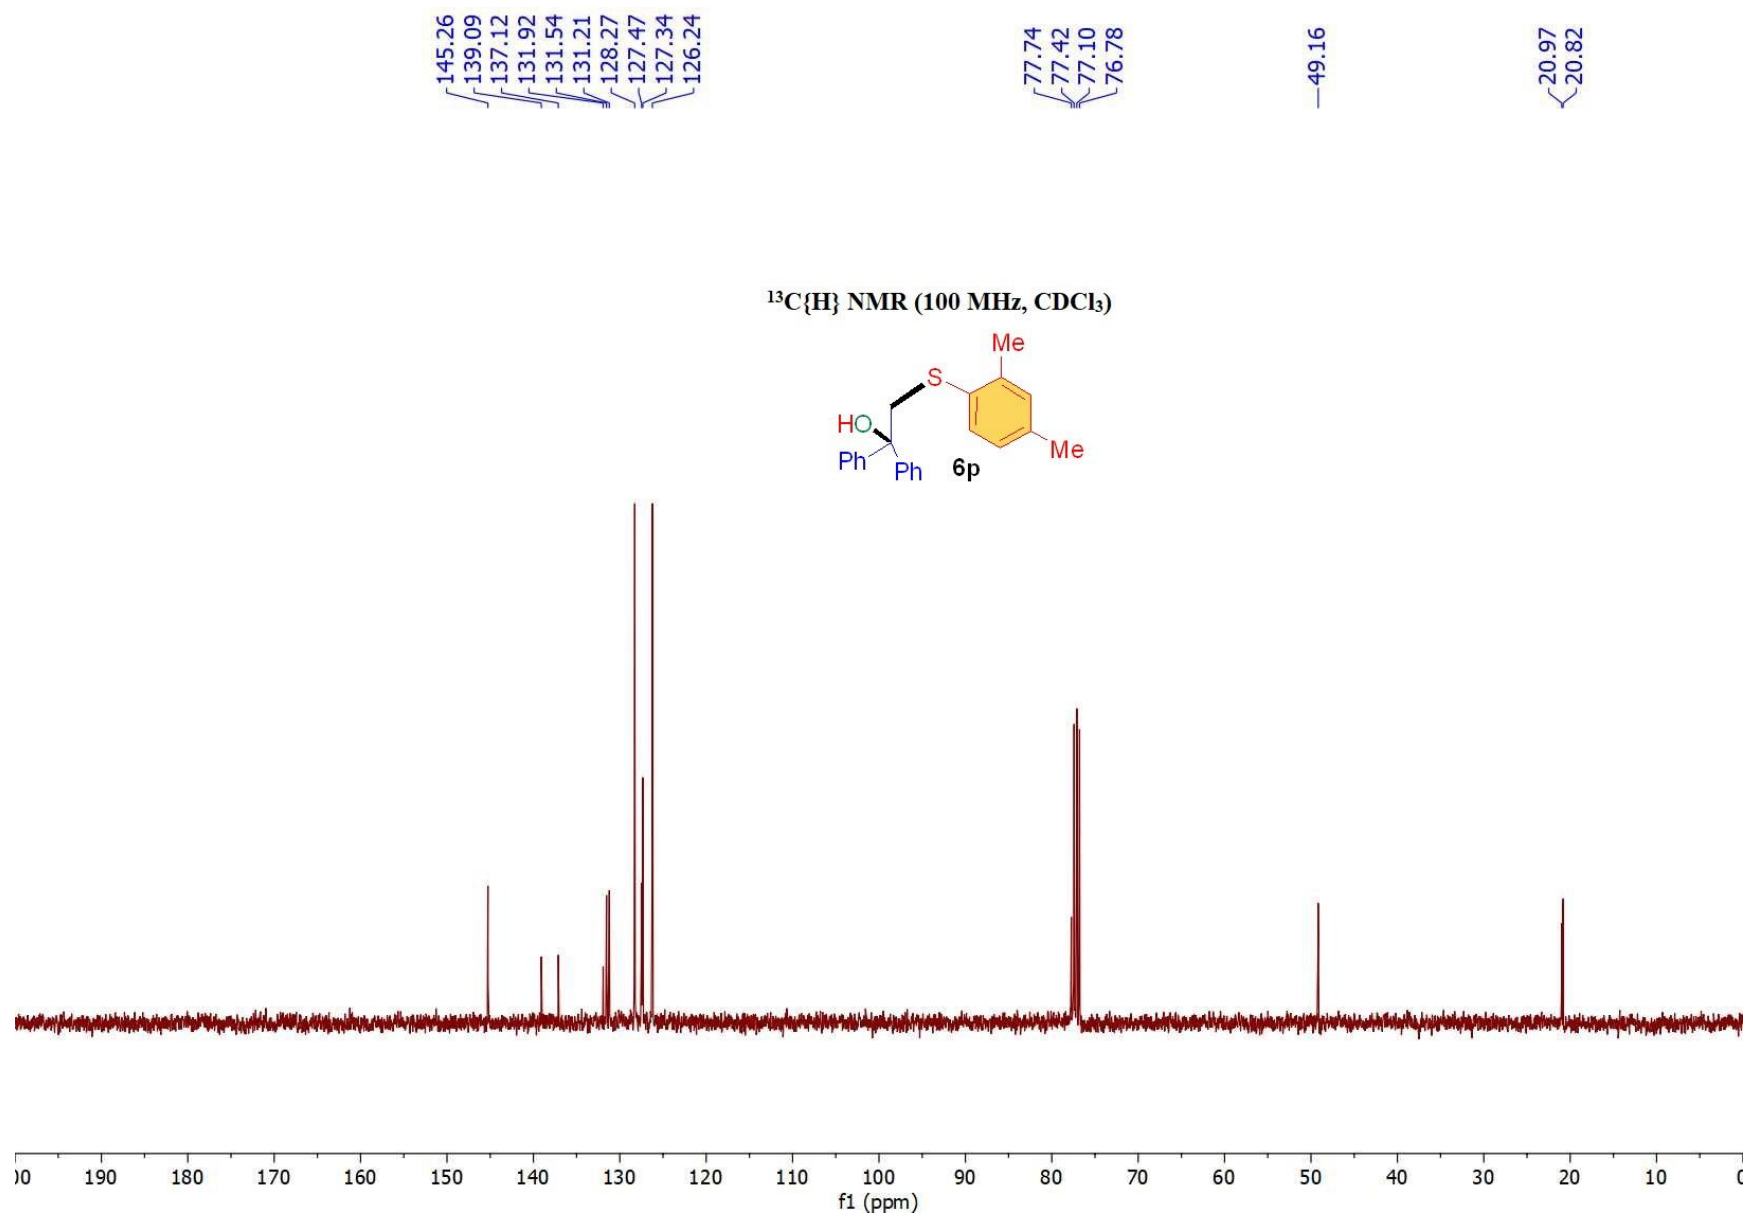

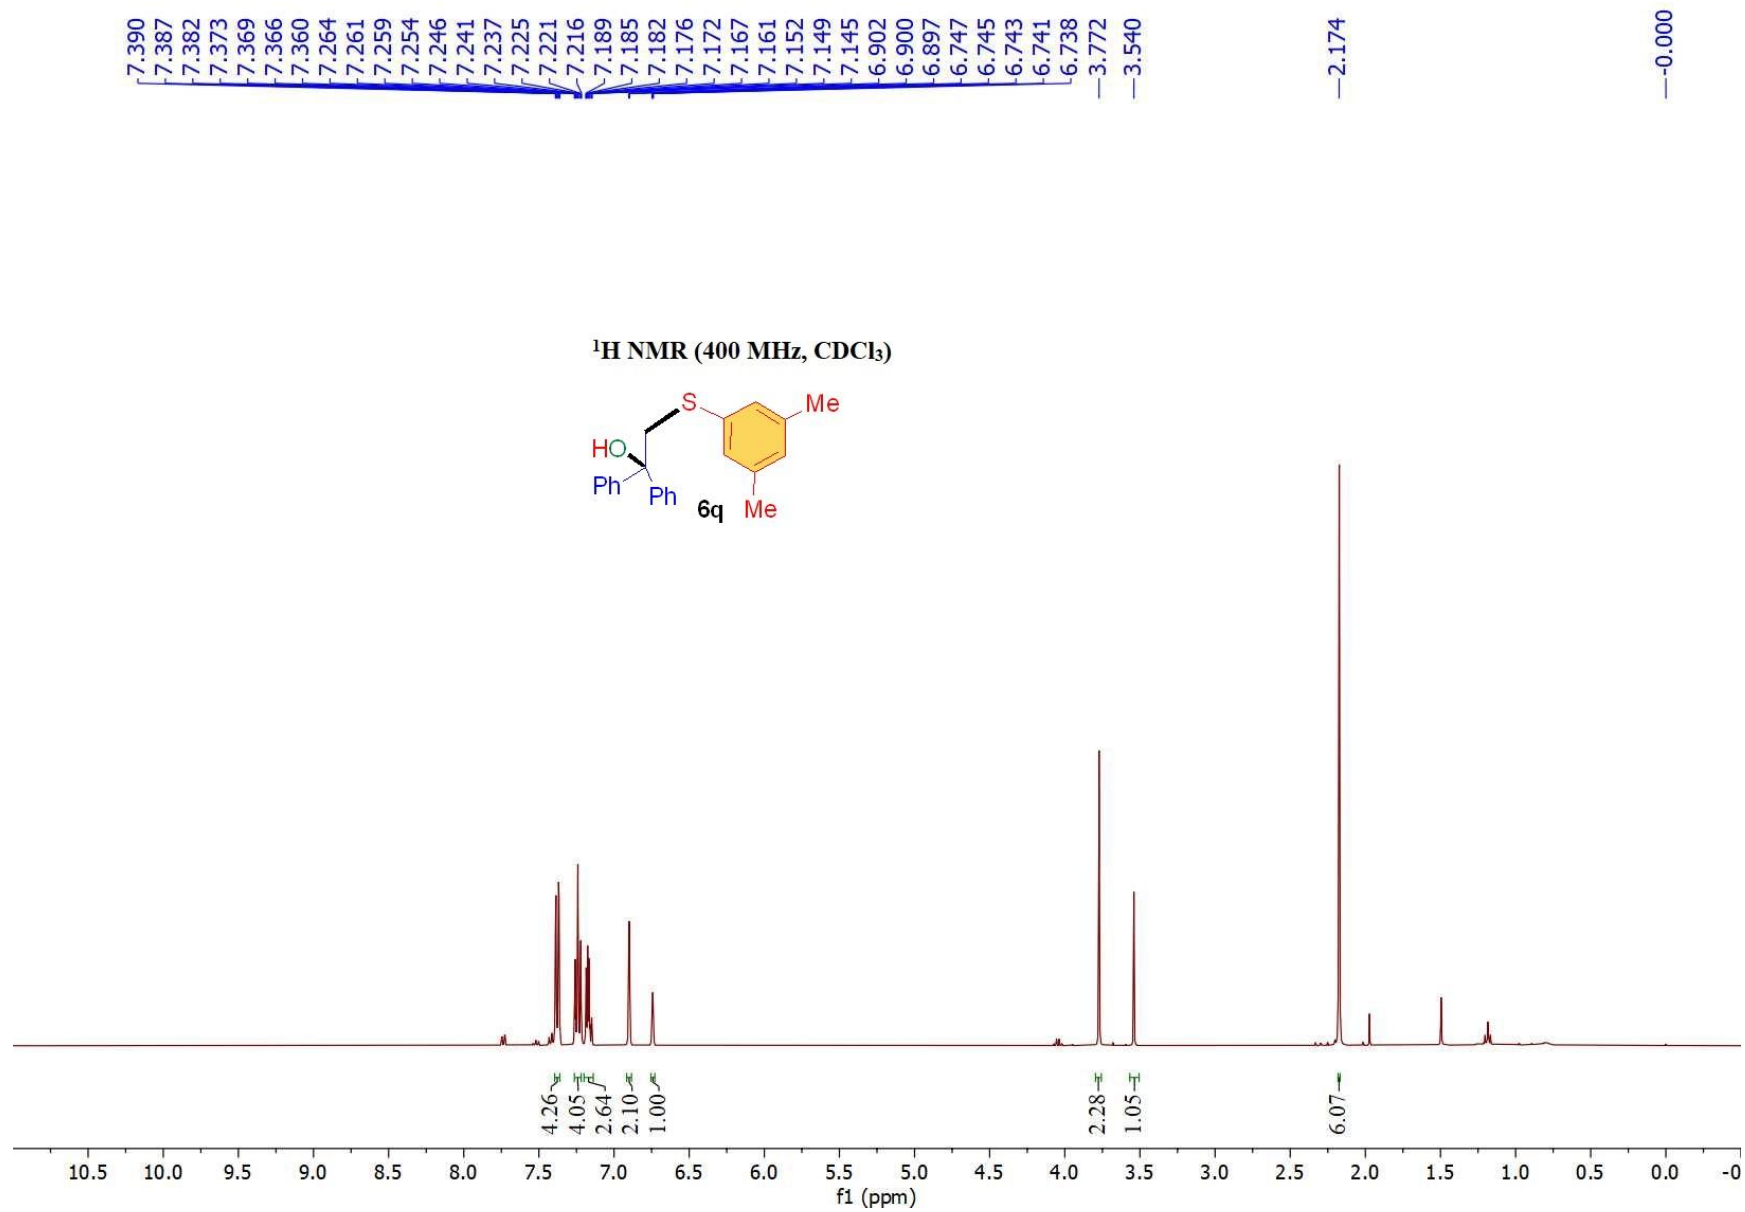

145.28  
138.75  
135.83  
128.70  
128.32  
128.18  
127.40  
126.24

77.68  
77.42  
77.10  
76.78

—49.11

—21.25

$^{13}\text{C}\{\text{H}\}$  NMR (100 MHz,  $\text{CDCl}_3$ )

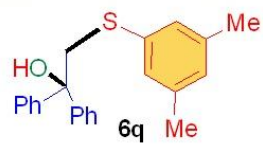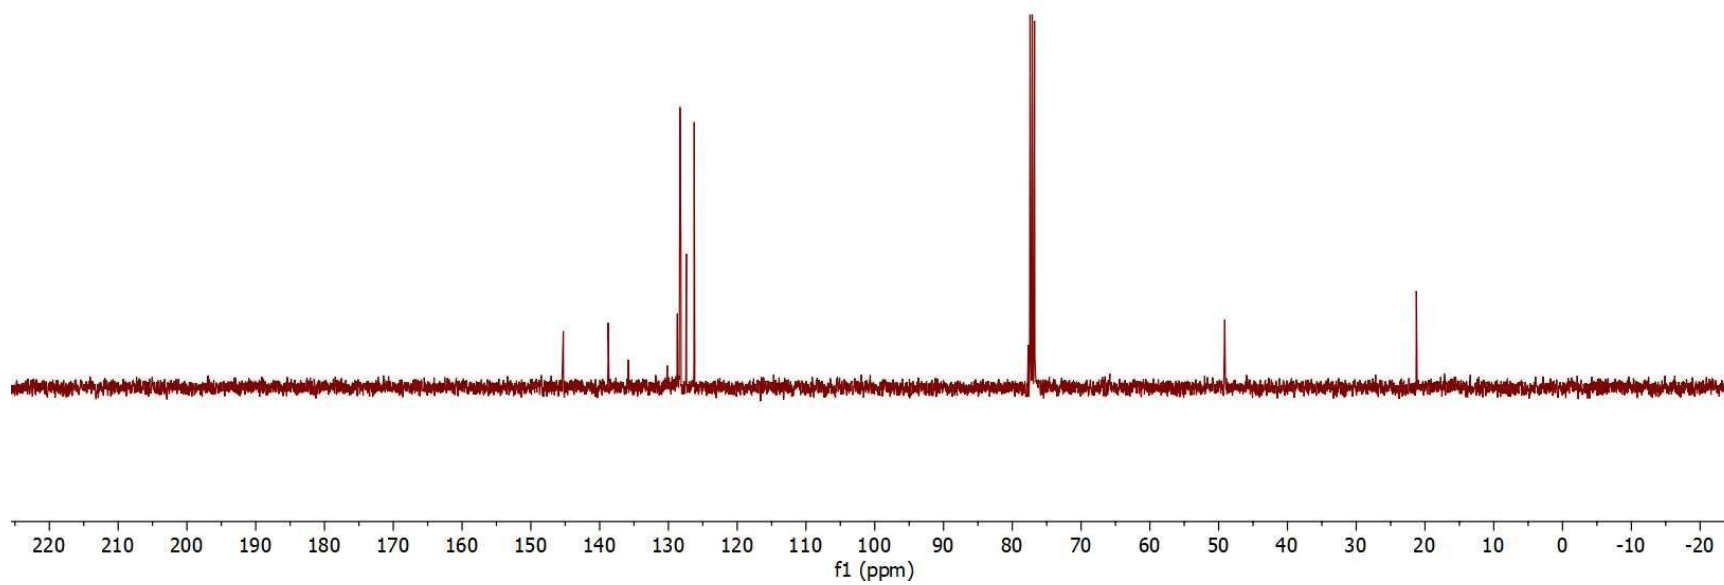

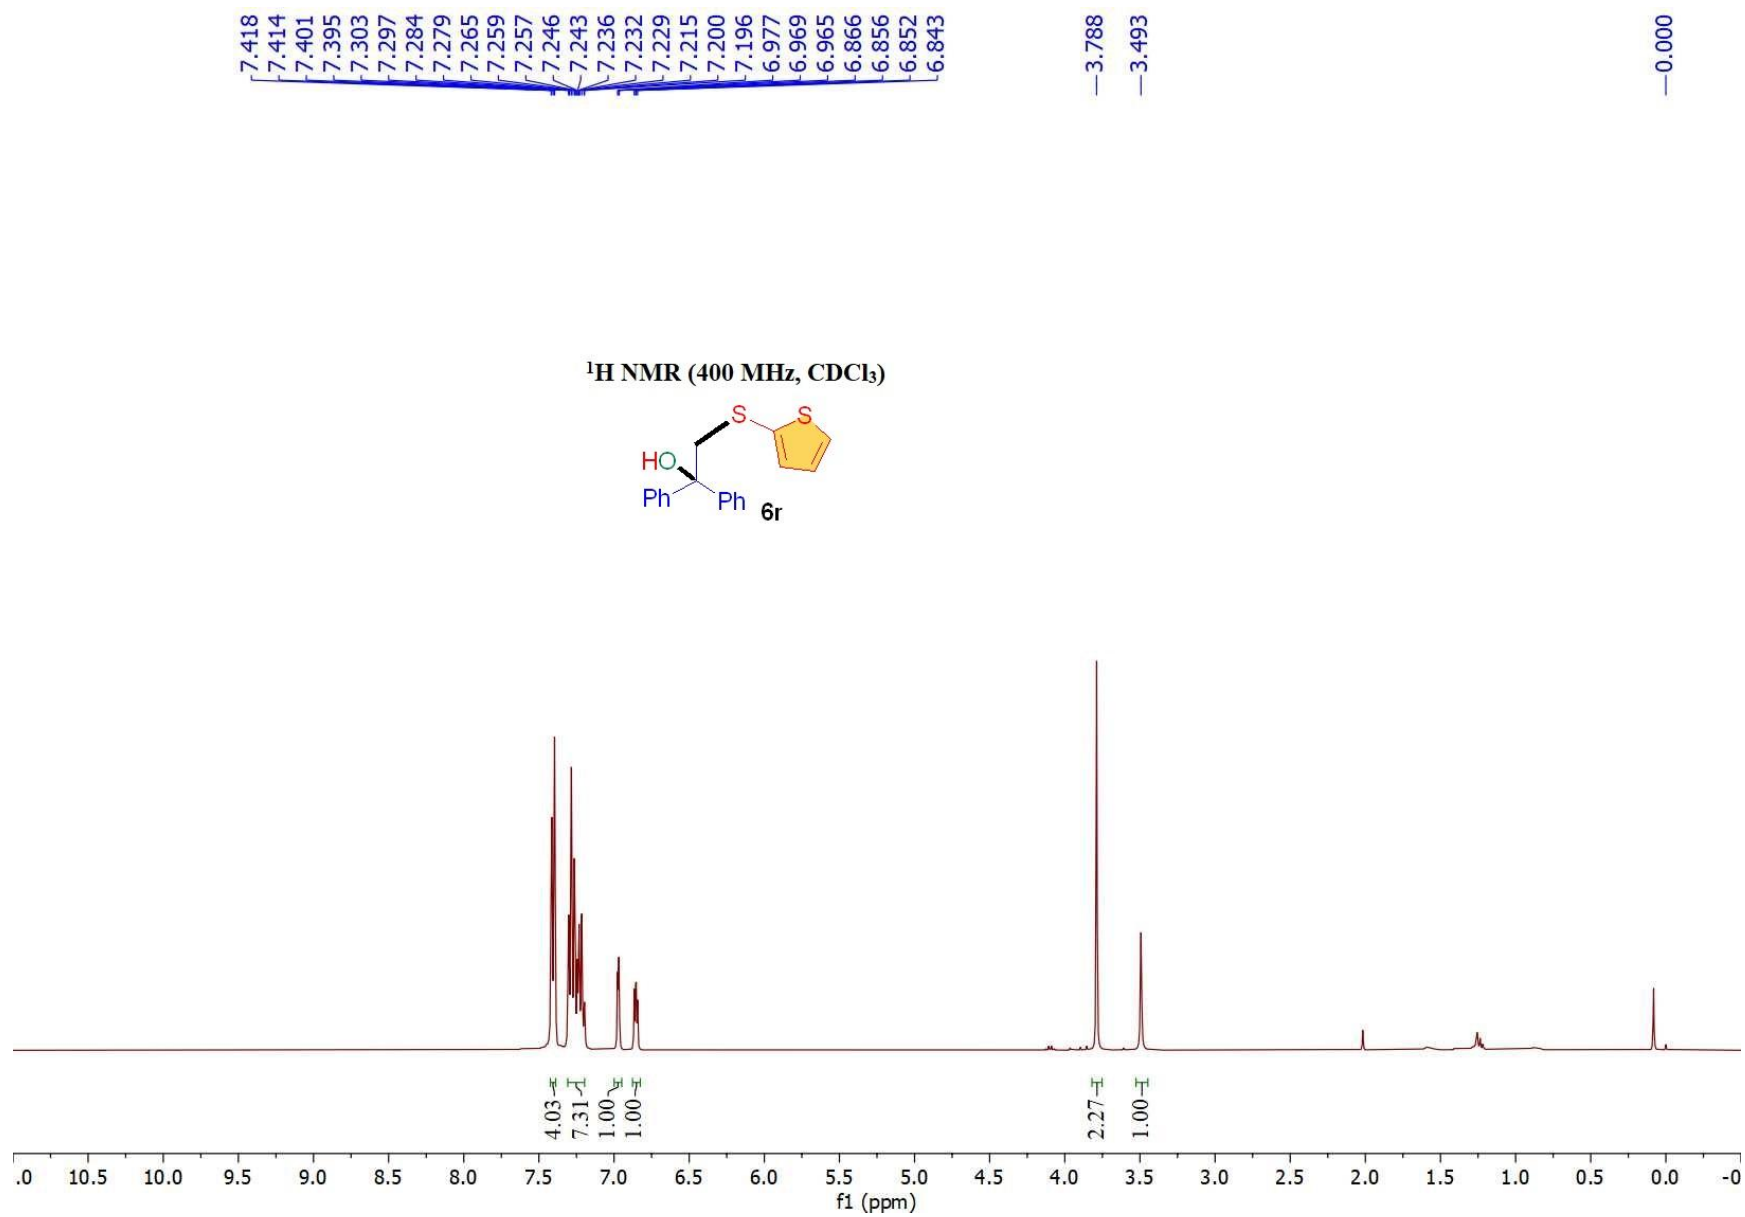

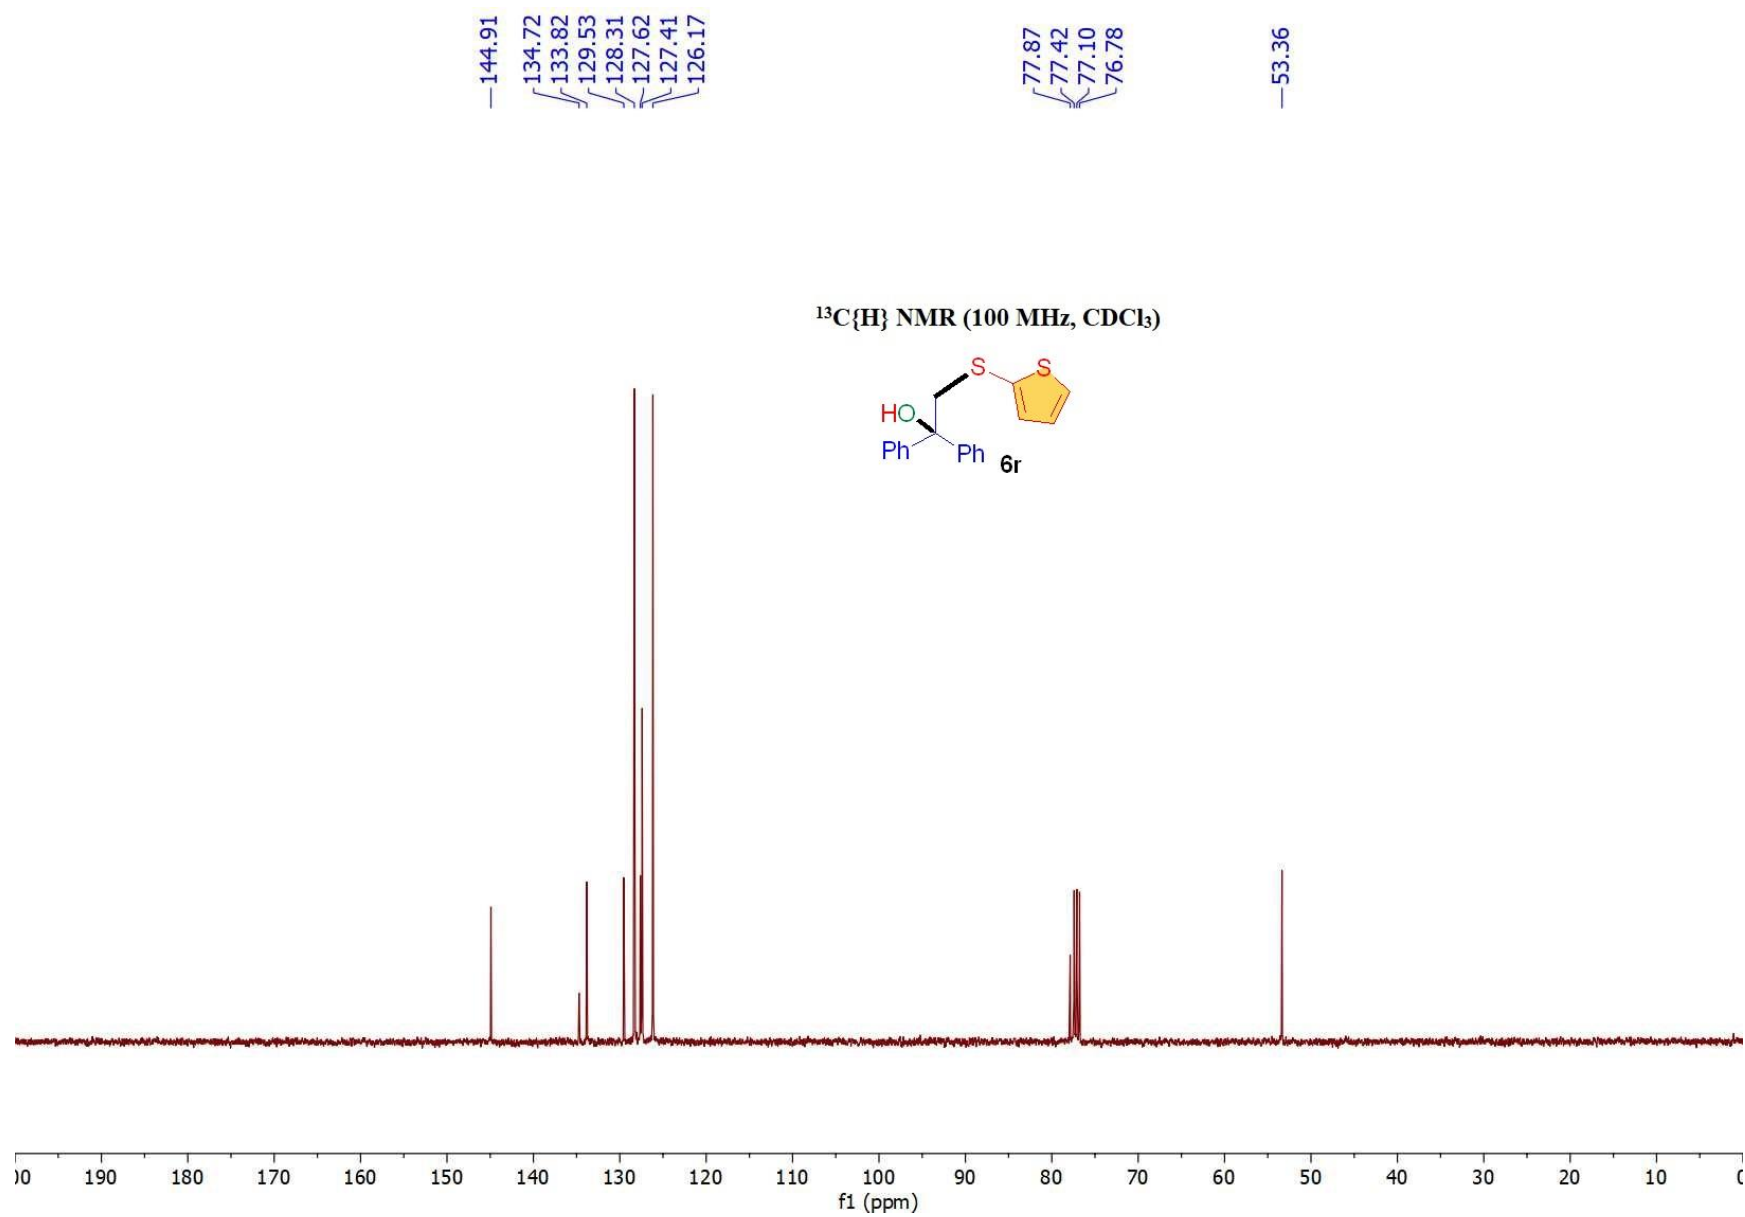

2-0313-thiophene-#1-10 11.000 0.2  
FTMS + p ESI Full ms [200.00-2000.00]

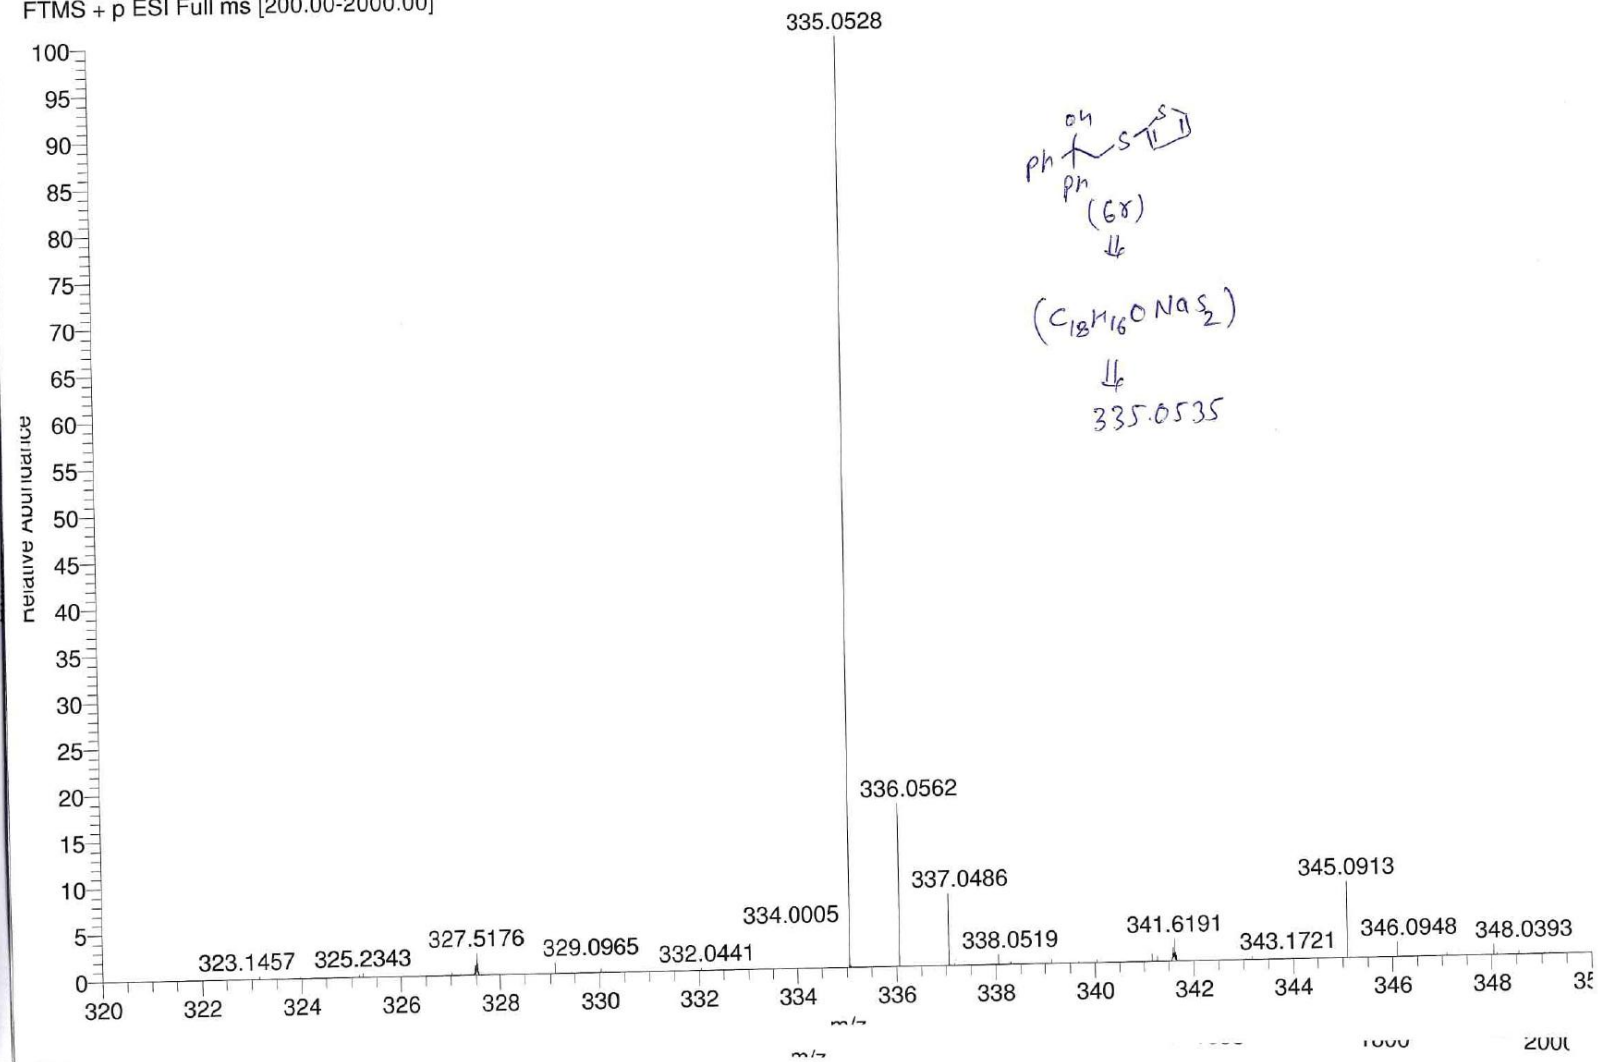

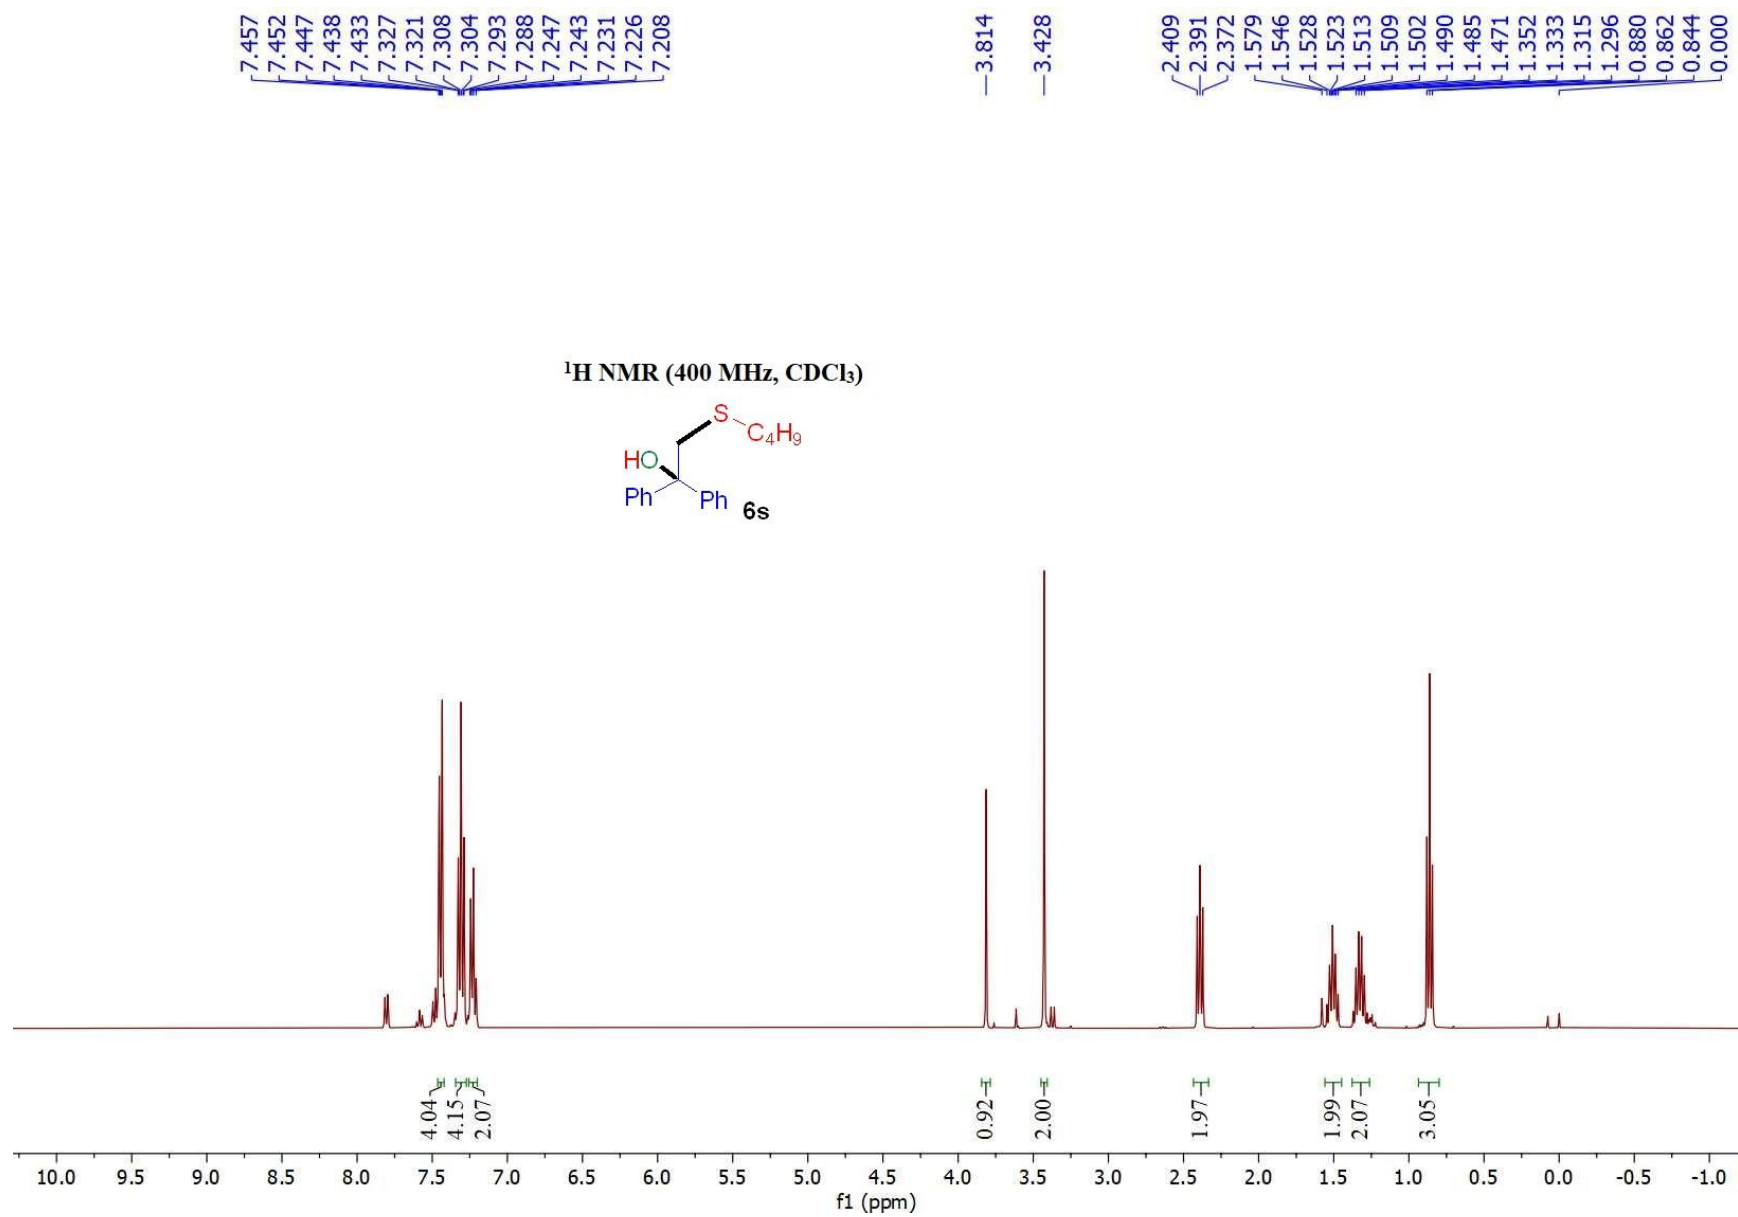

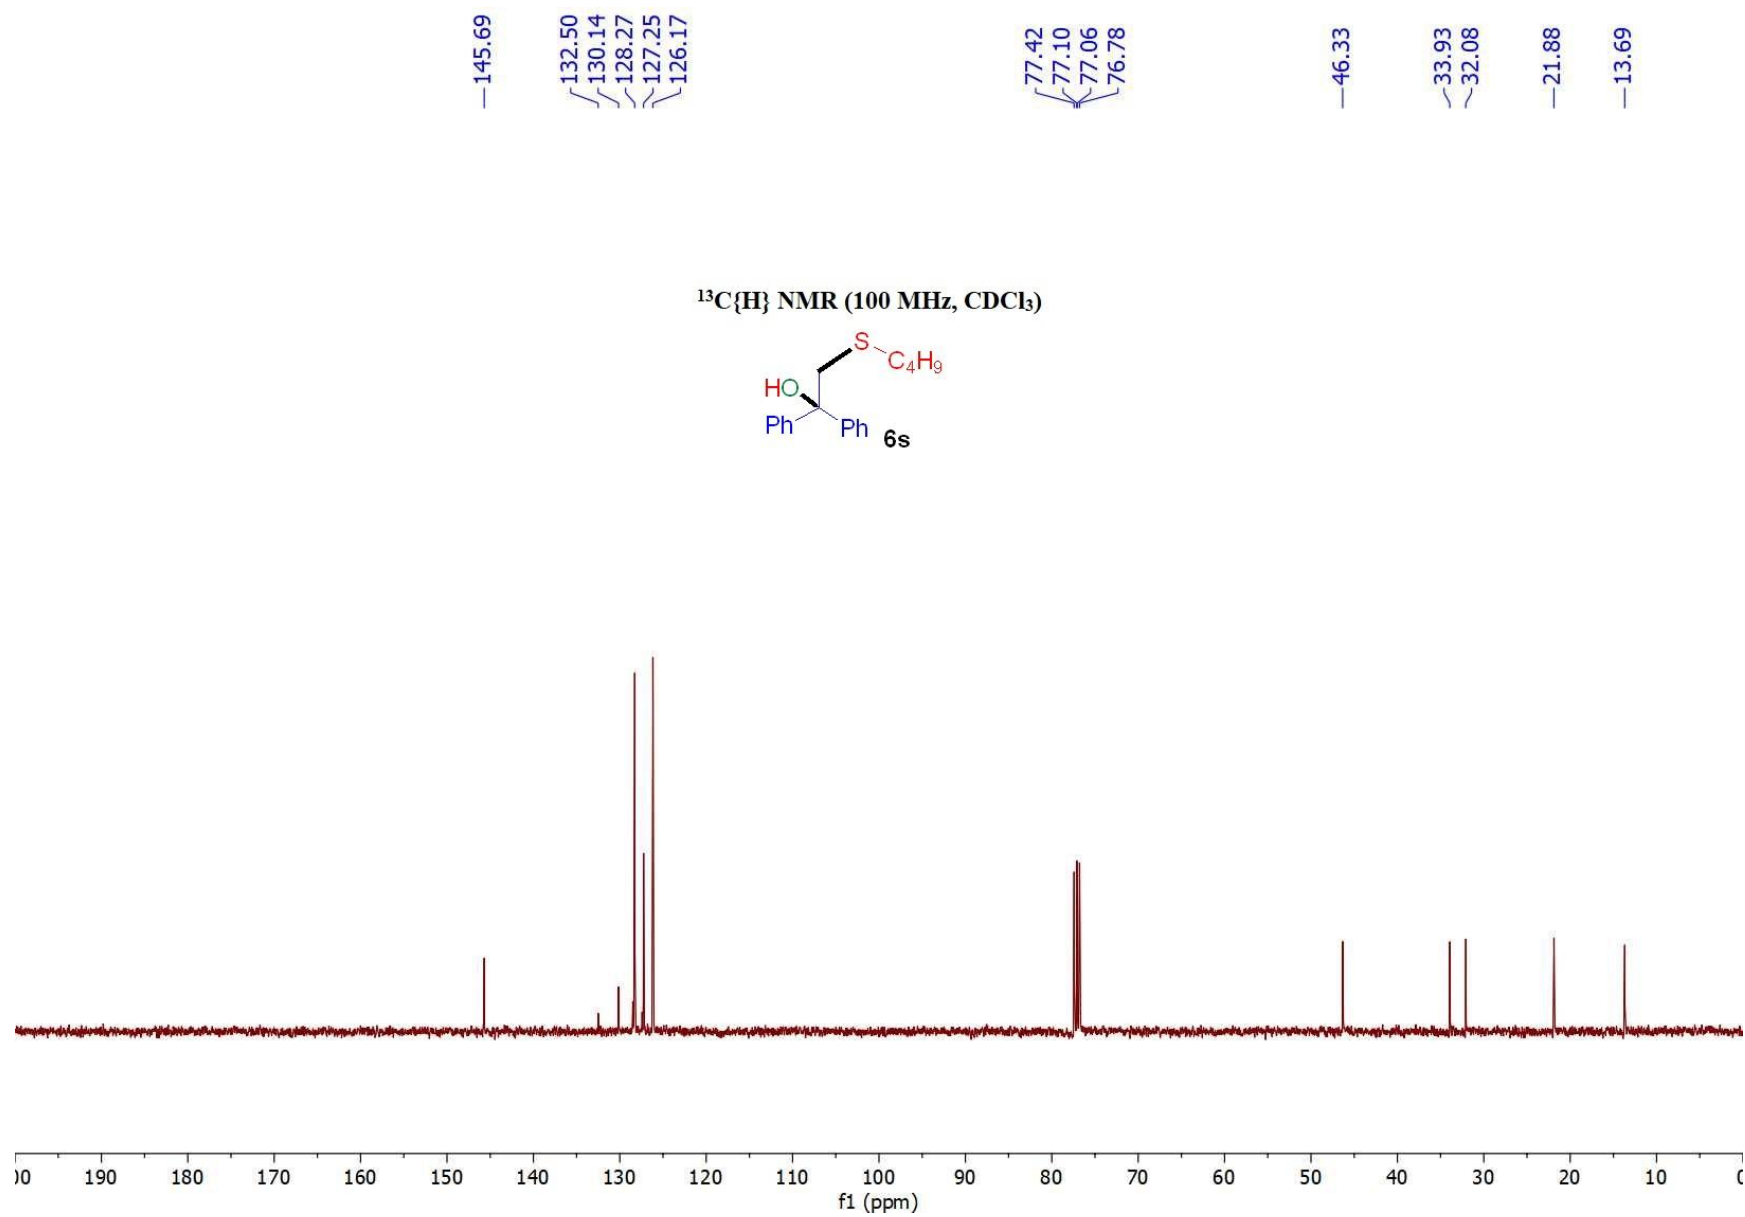

03-0319-butylthio-N-H #1-20 RT: 0.02-0.36 AV: 20 NL: 7.24E3  
T: FTMS - p ESI Full ms [200.0000-1000.0000]

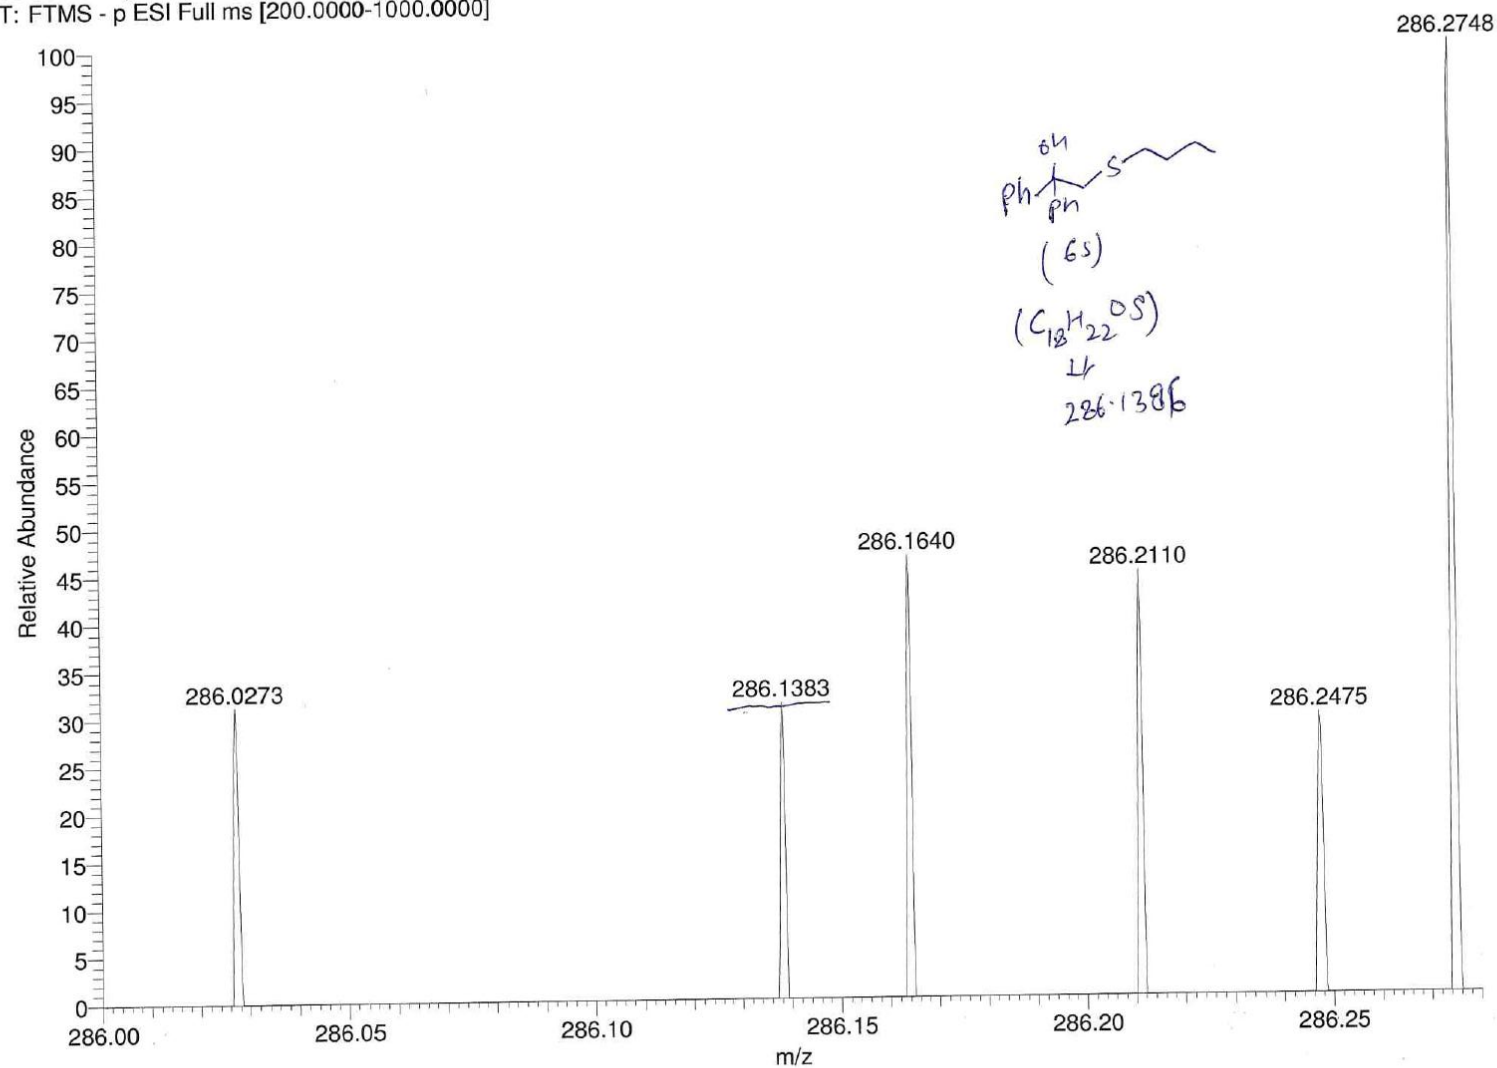

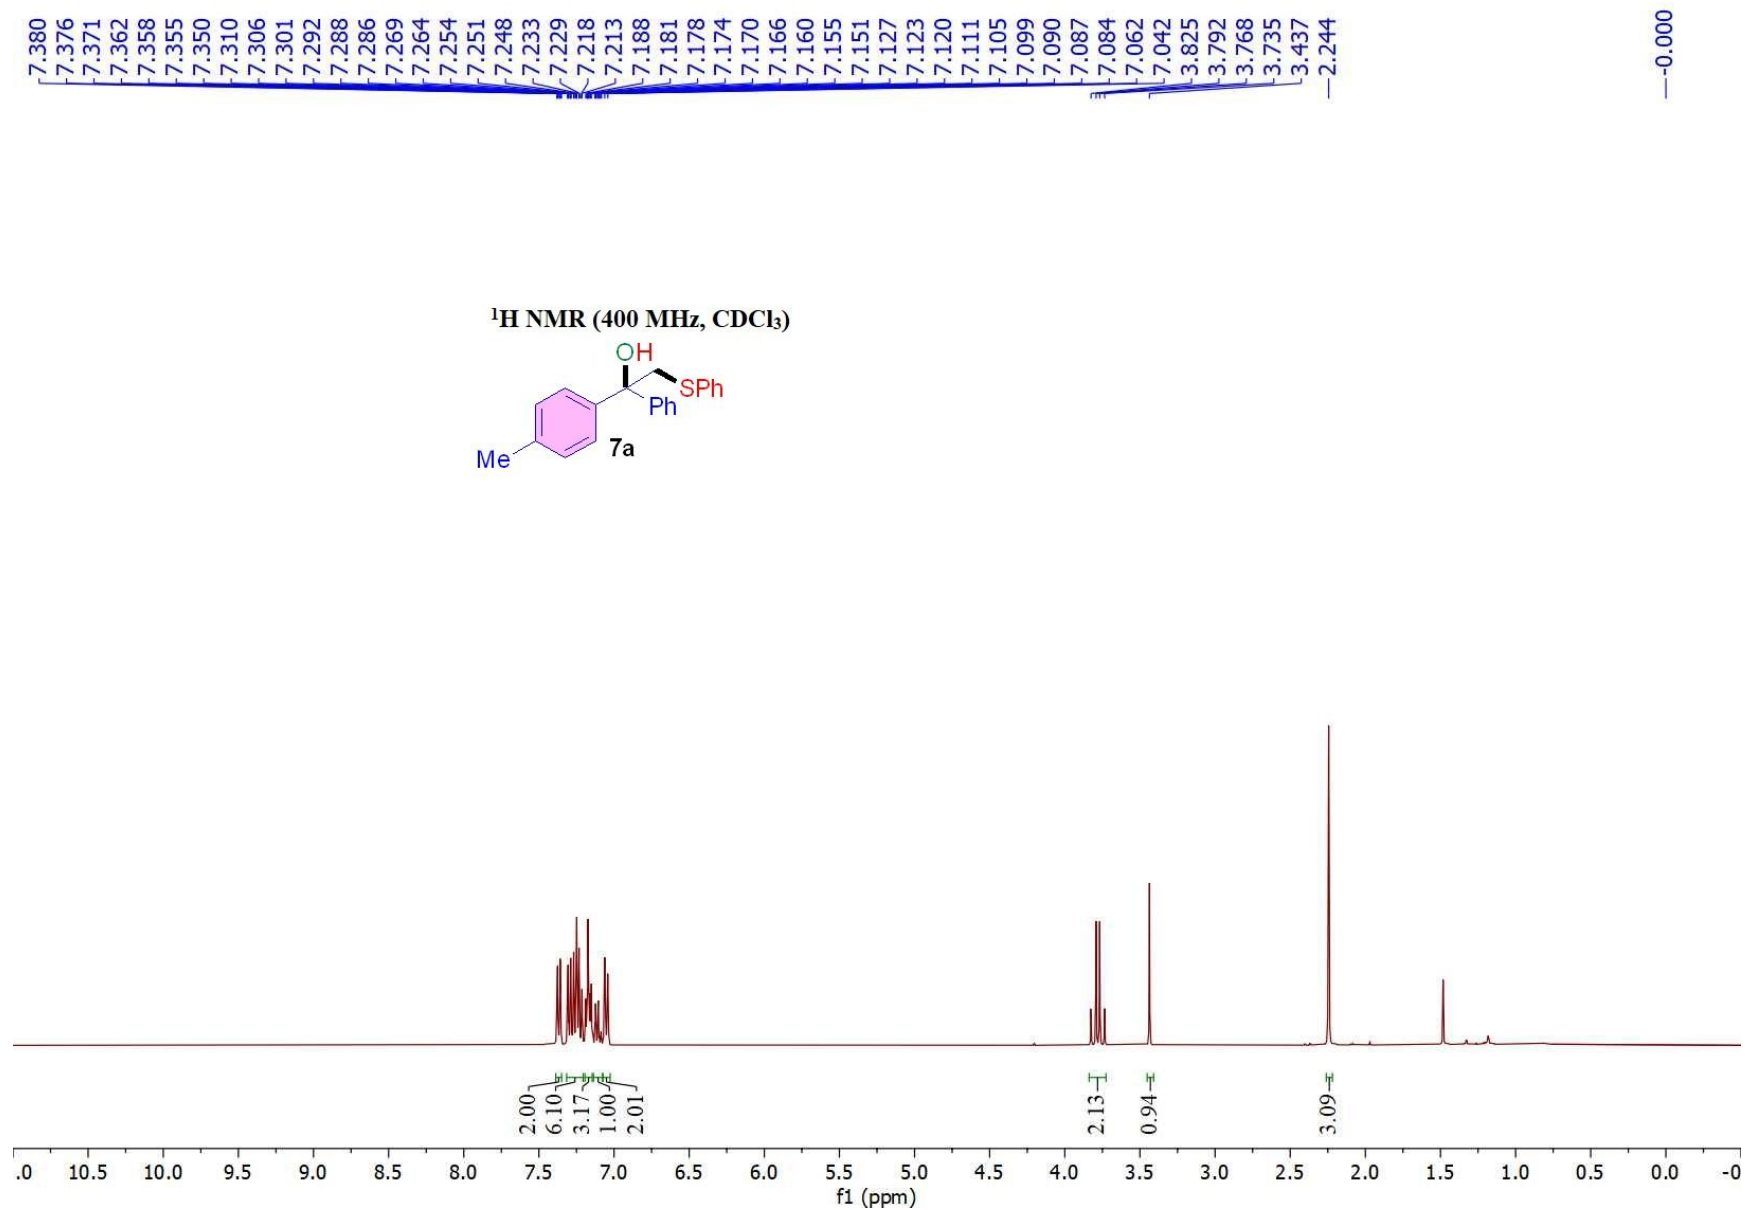

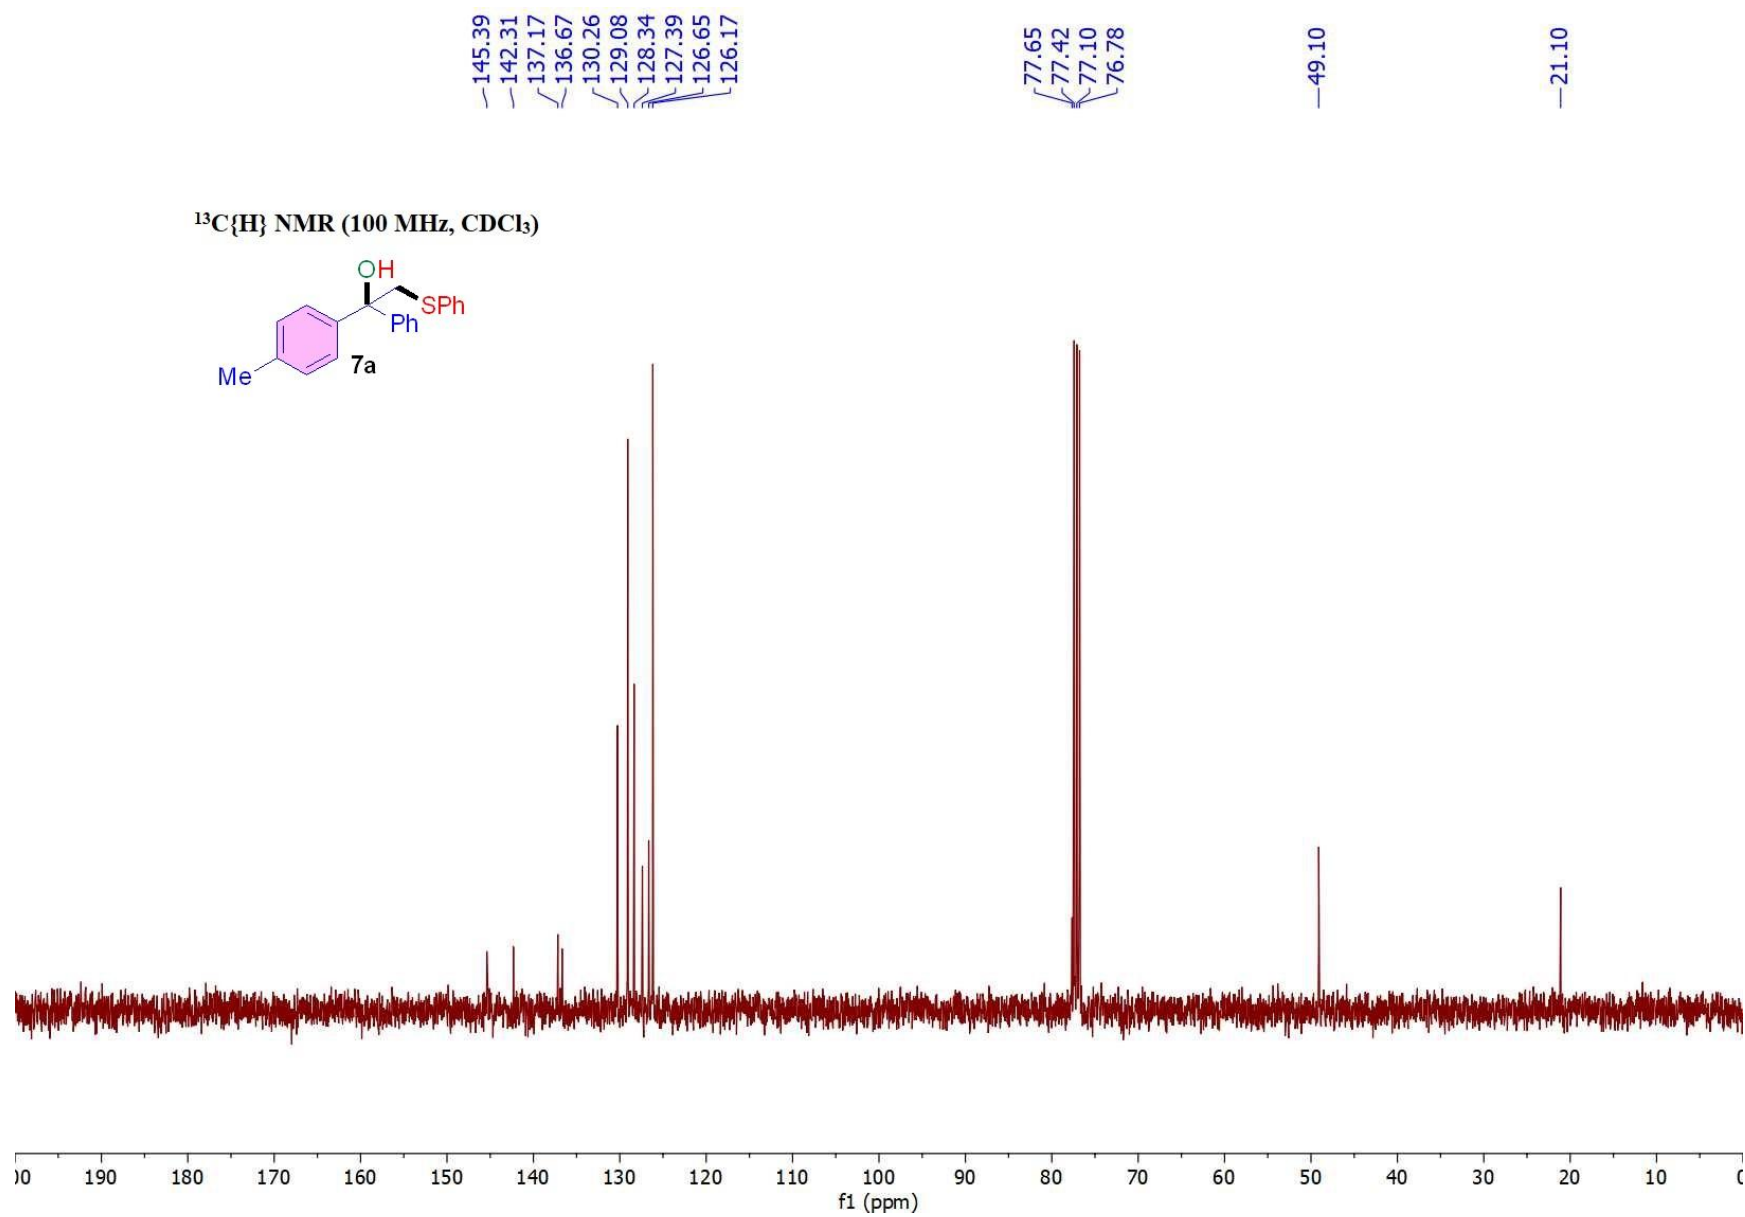

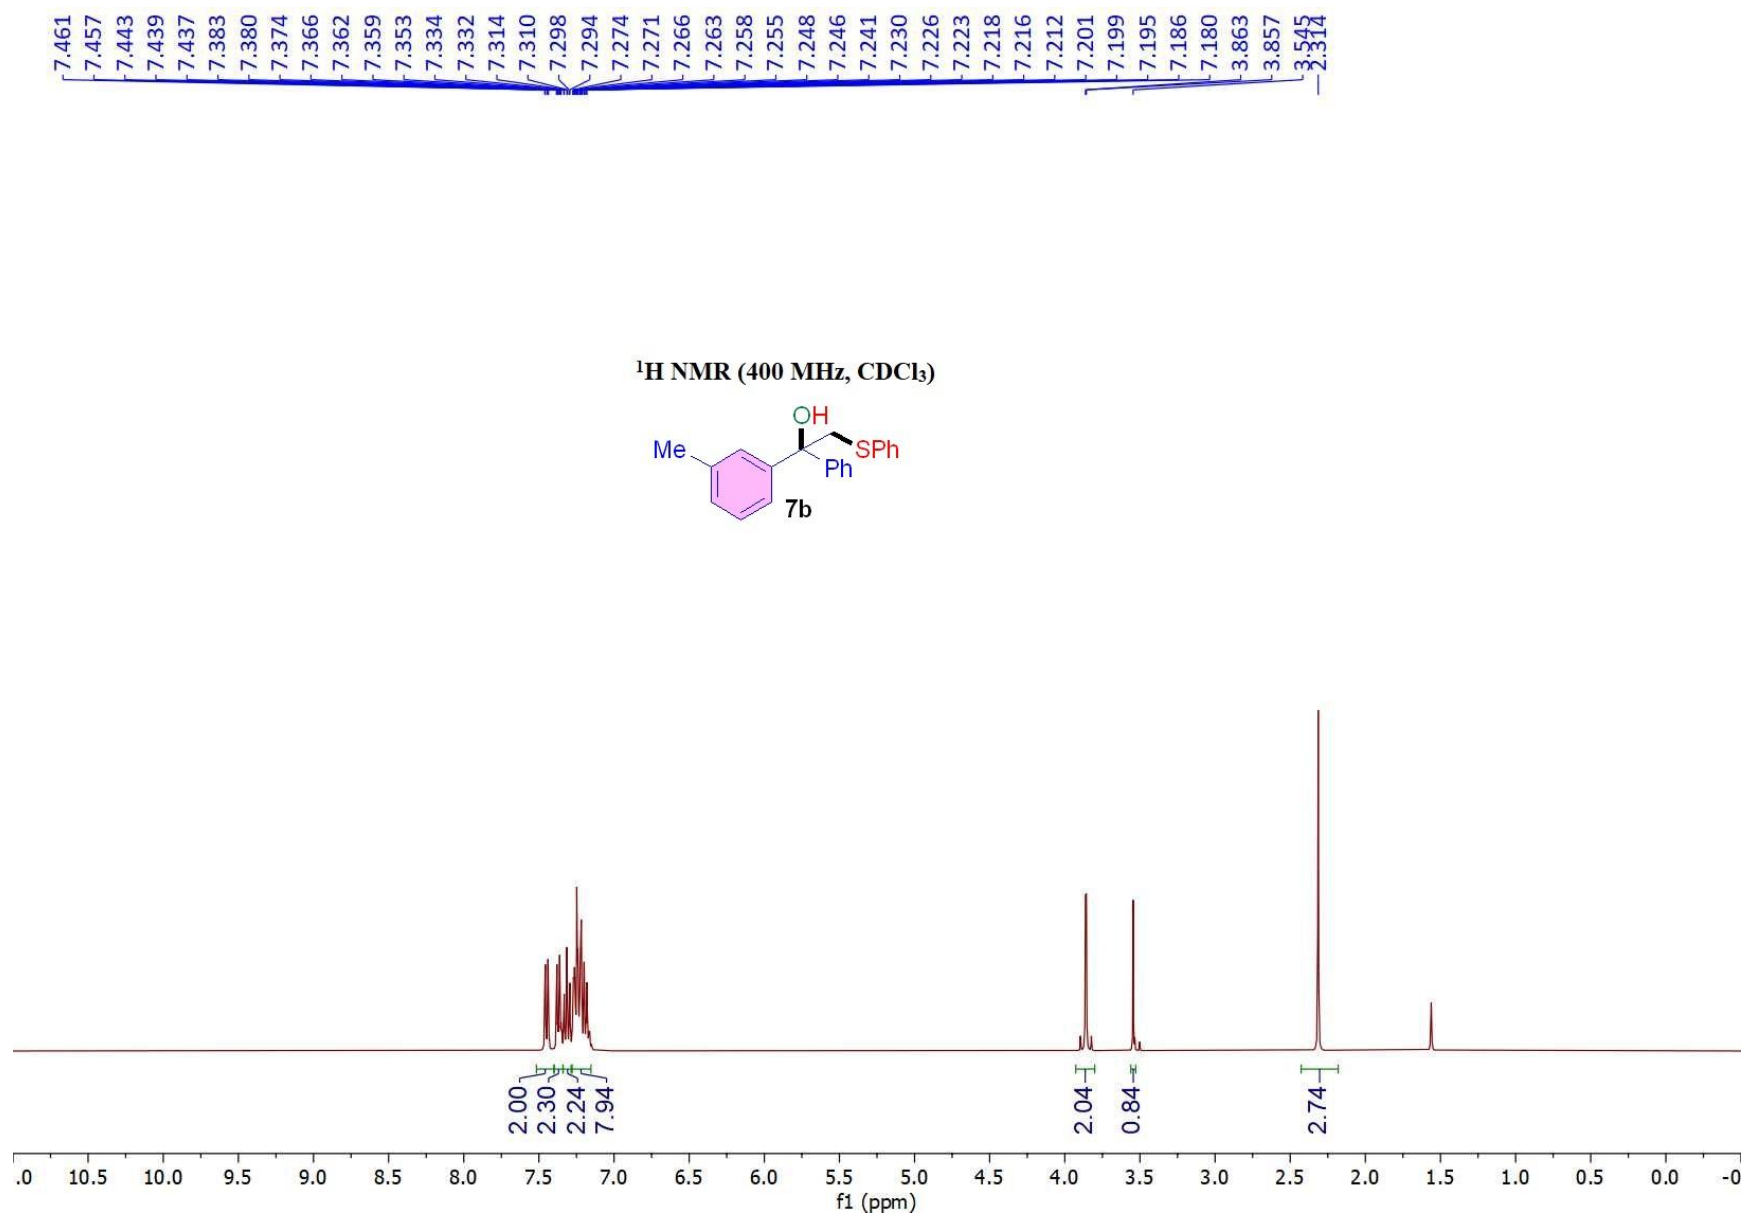

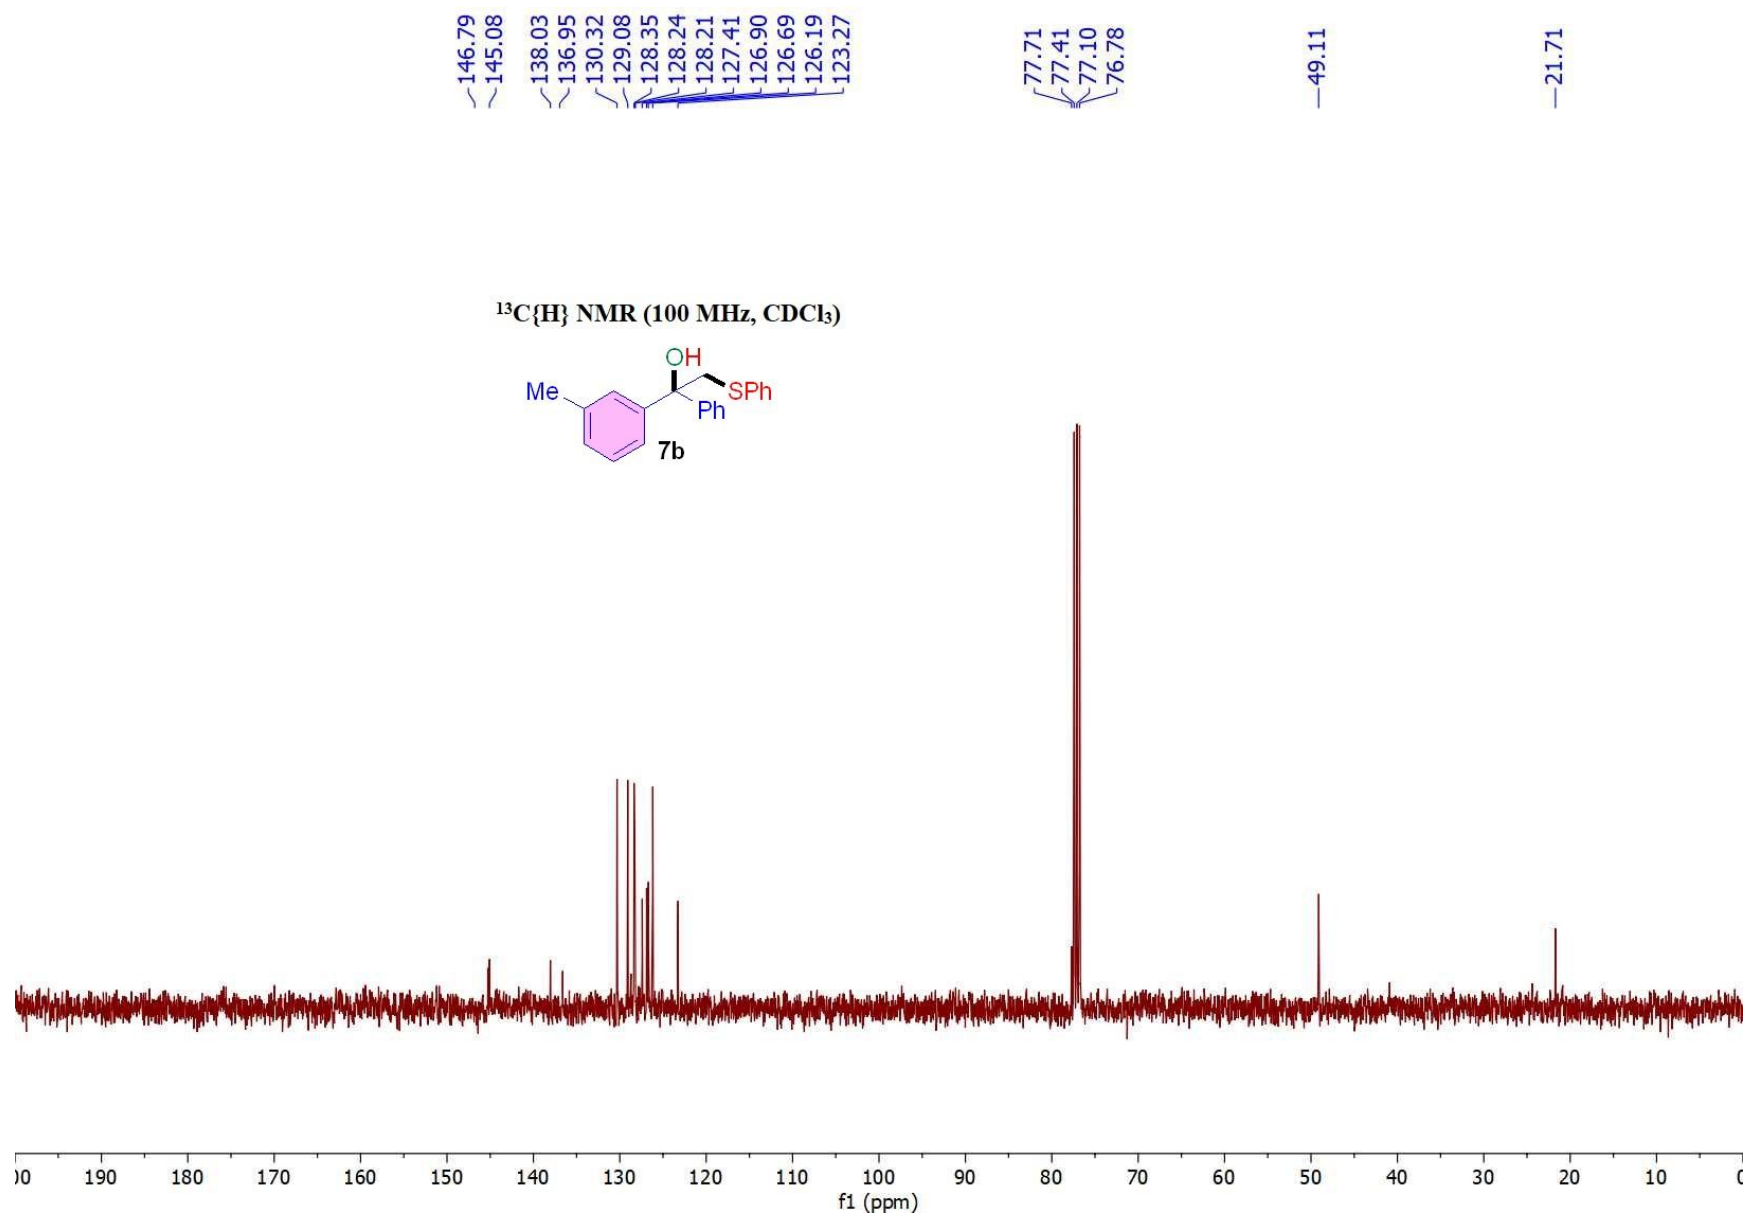

0210-3-Me-H #1-10 RT: 0.00-0.25 AV: 10 NL: 2.14E6  
FTMS + p ESI Full ms [200.00-2000.00]

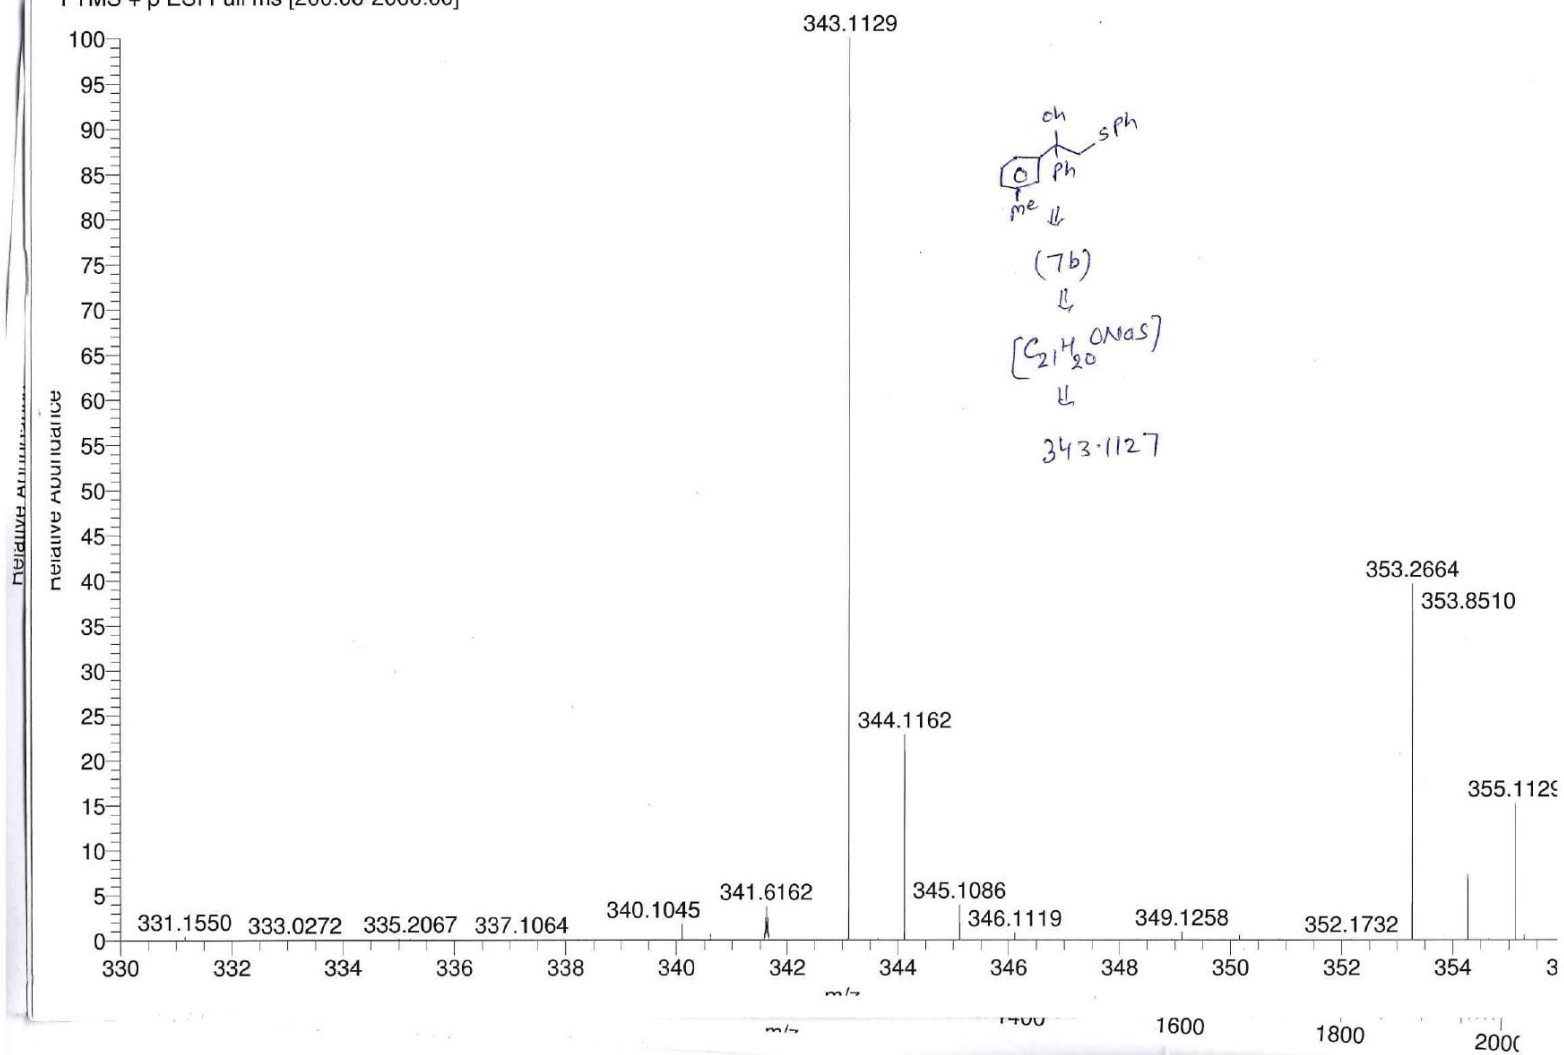

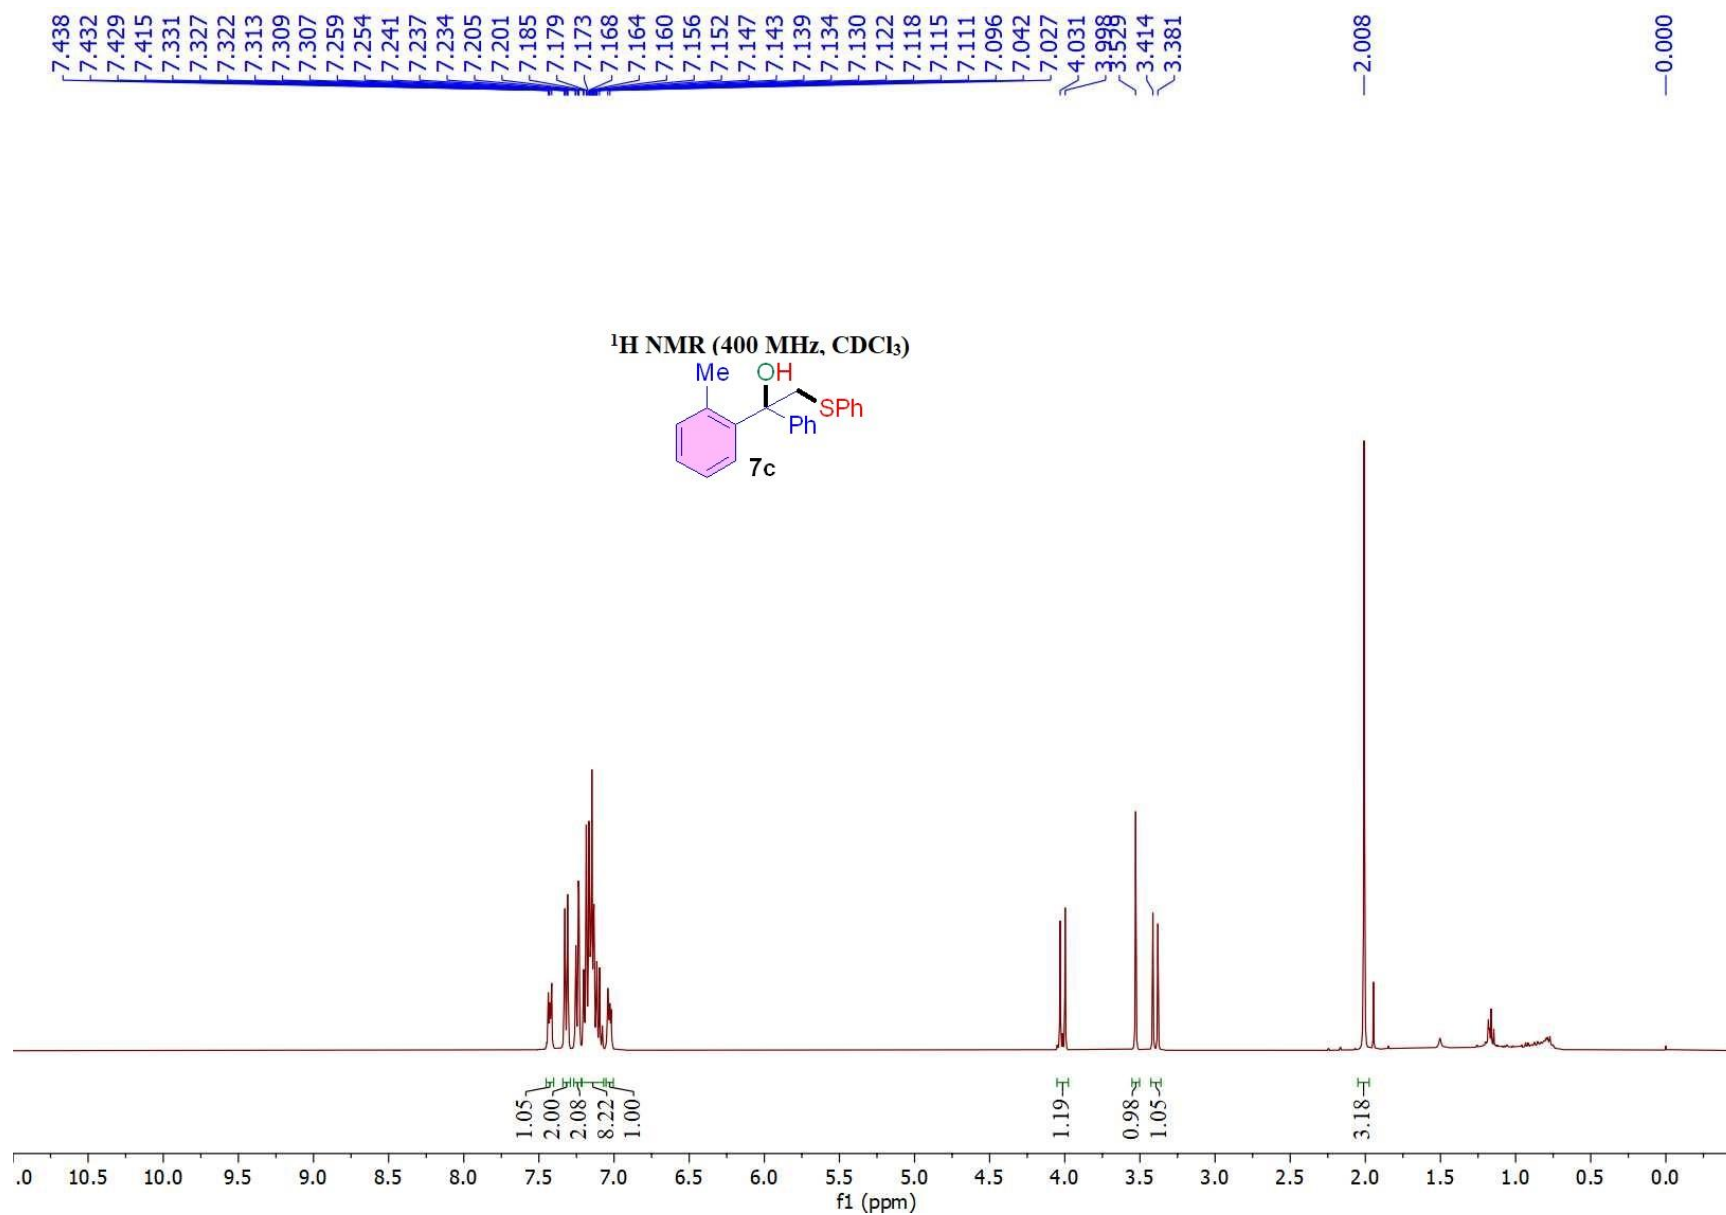

145.30  
141.78  
138.54  
136.91  
132.96  
130.26  
129.10  
128.16  
128.08  
127.15  
126.71  
126.66  
125.84  
125.17

78.67  
77.41  
77.10  
76.78

—50.43

—21.65

$^{13}\text{C}\{\text{H}\}$  NMR (100 MHz,  $\text{CDCl}_3$ )

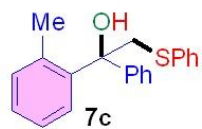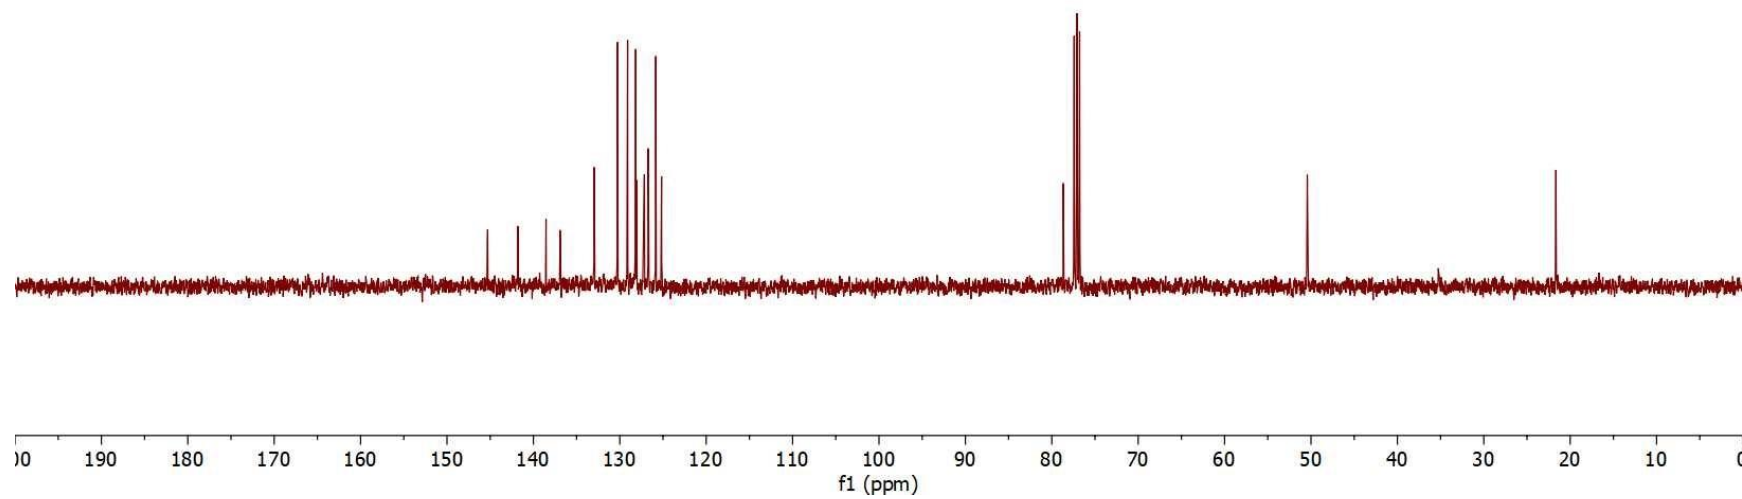

0-2-Me-H #1-10 RT: 0.01-0.26 AV: 10 NL: 1.9/E5  
TMS + p ESI Full ms [200.00-2000.00]

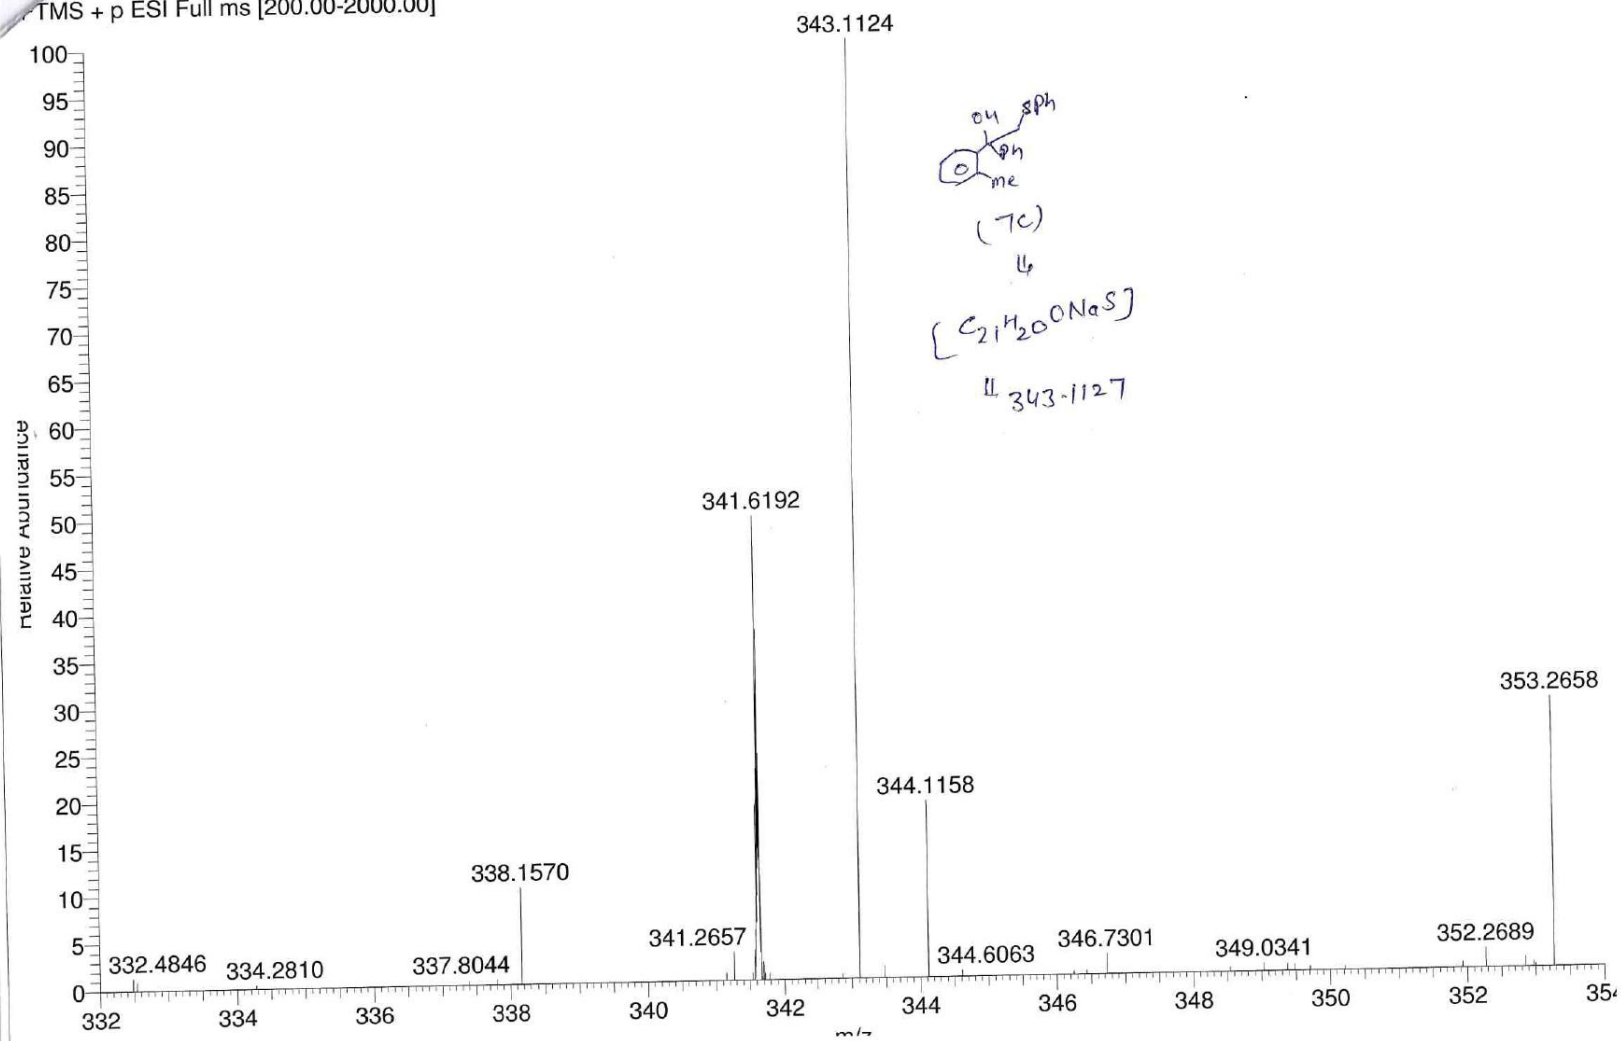

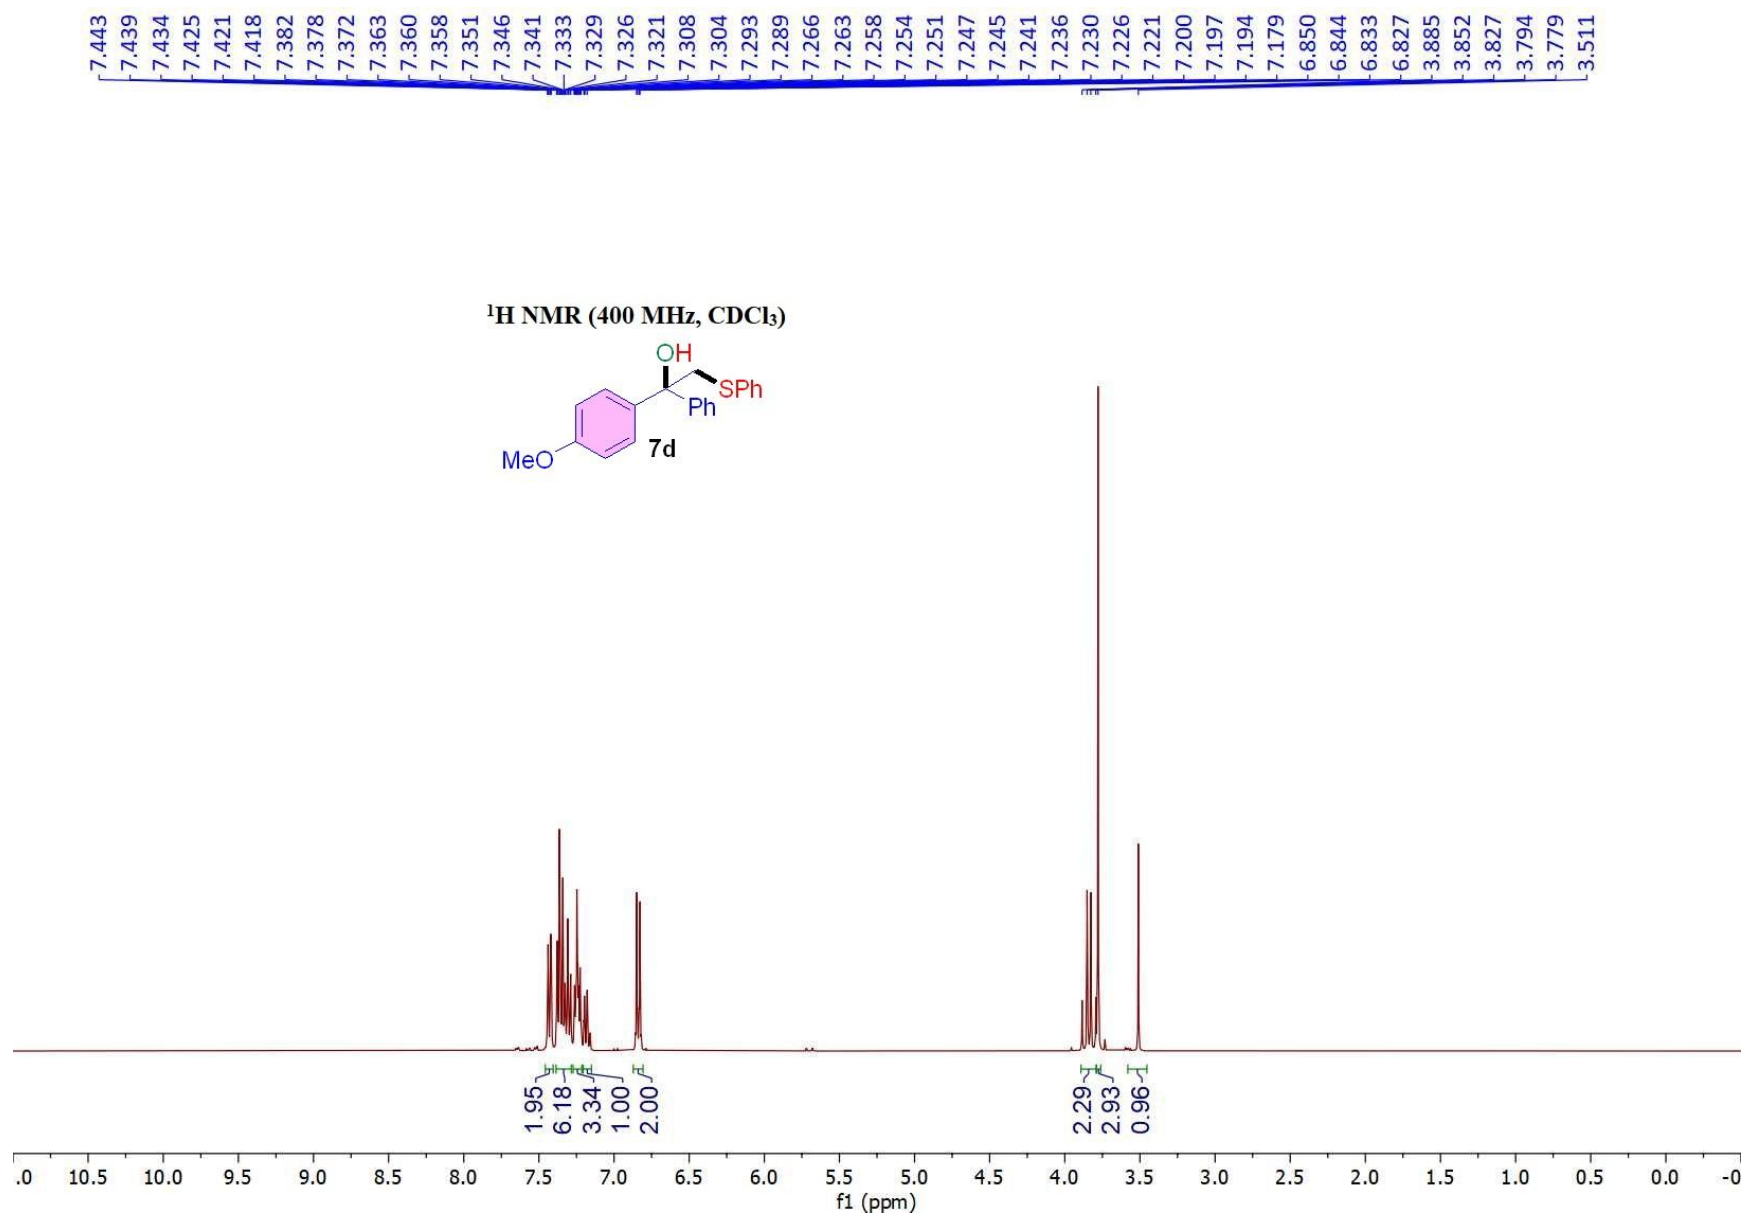

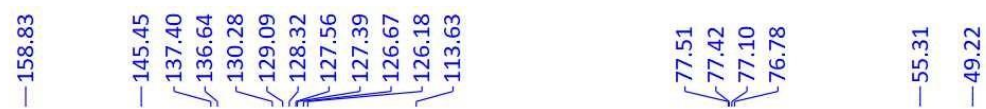

$^{13}\text{C}\{\text{H}\}$  NMR (100 MHz,  $\text{CDCl}_3$ )

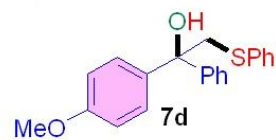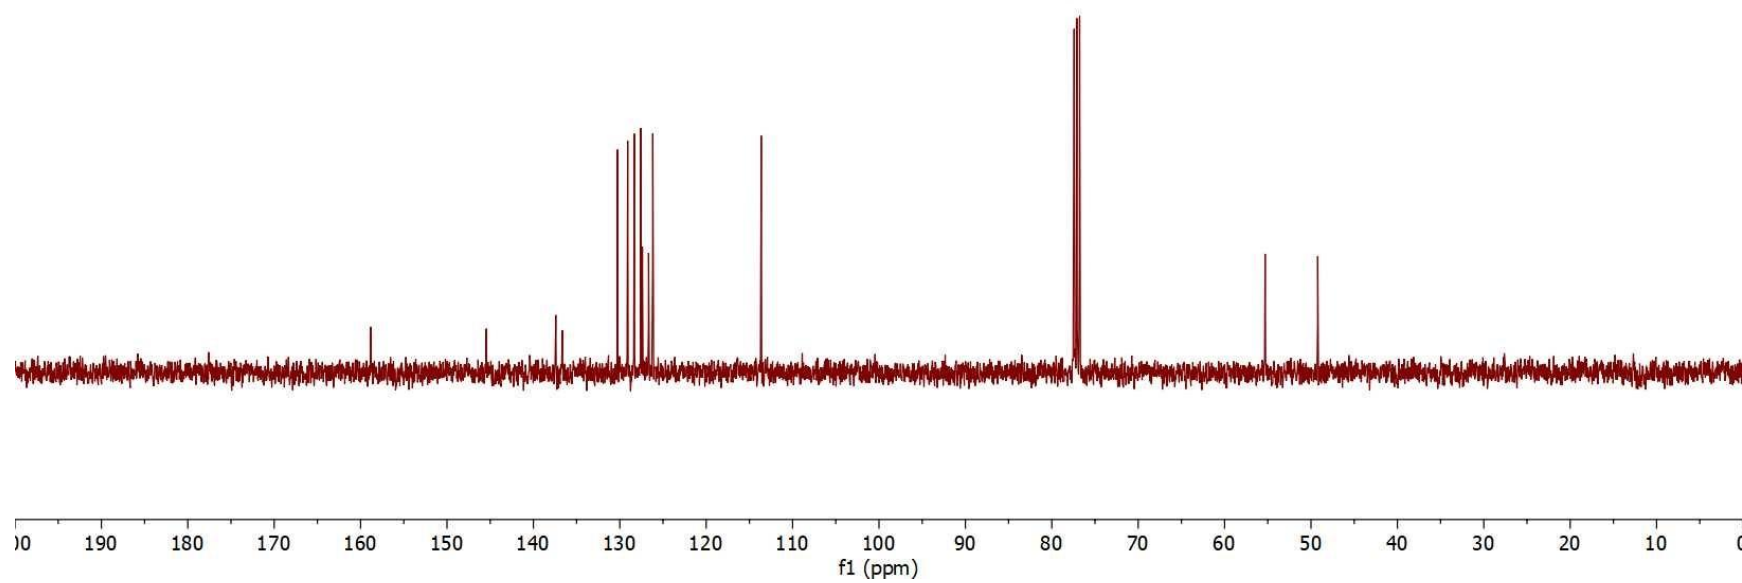

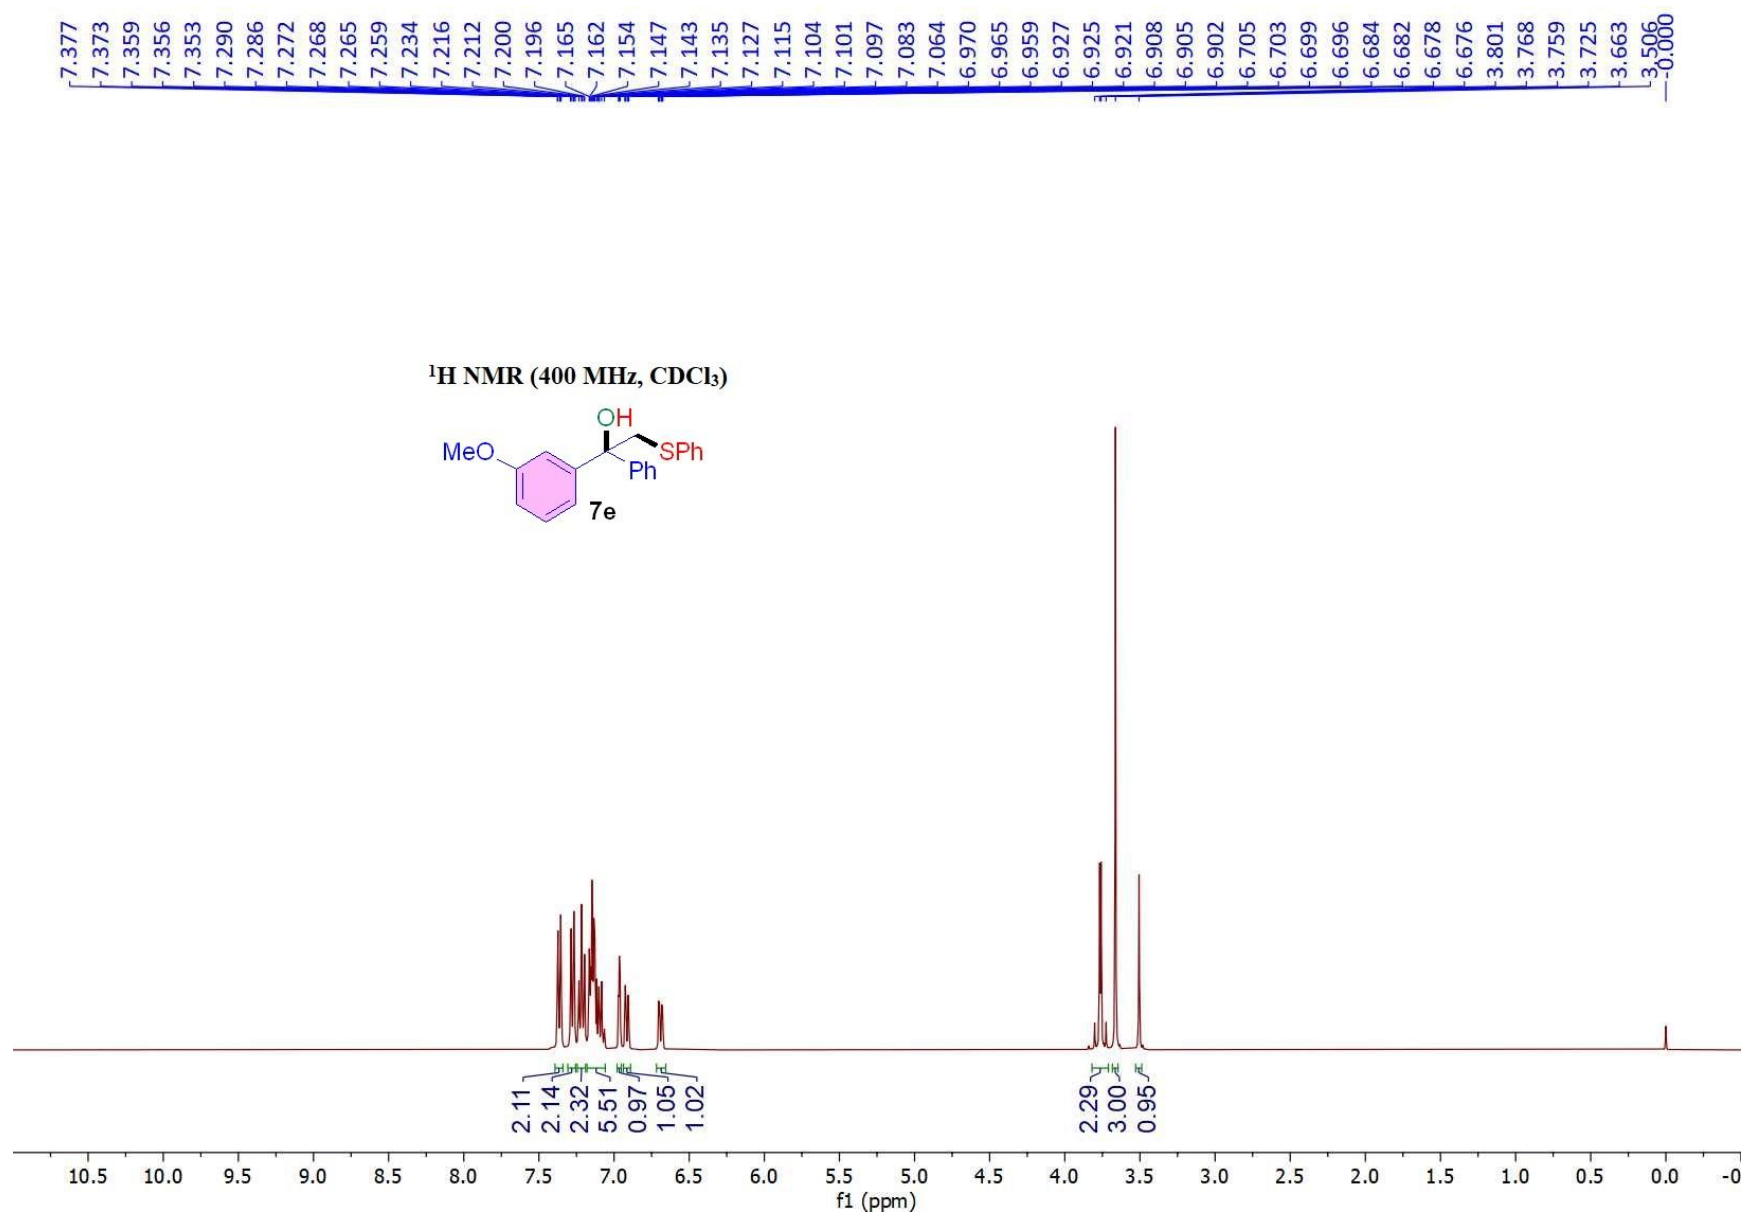

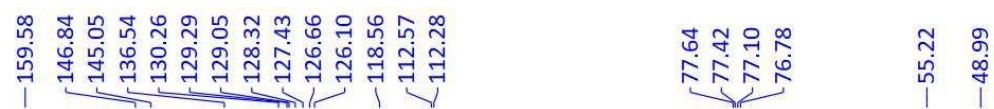

$^{13}\text{C}\{^1\text{H}\}$  NMR (100 MHz,  $\text{CDCl}_3$ )

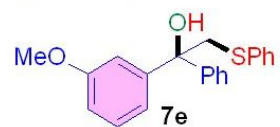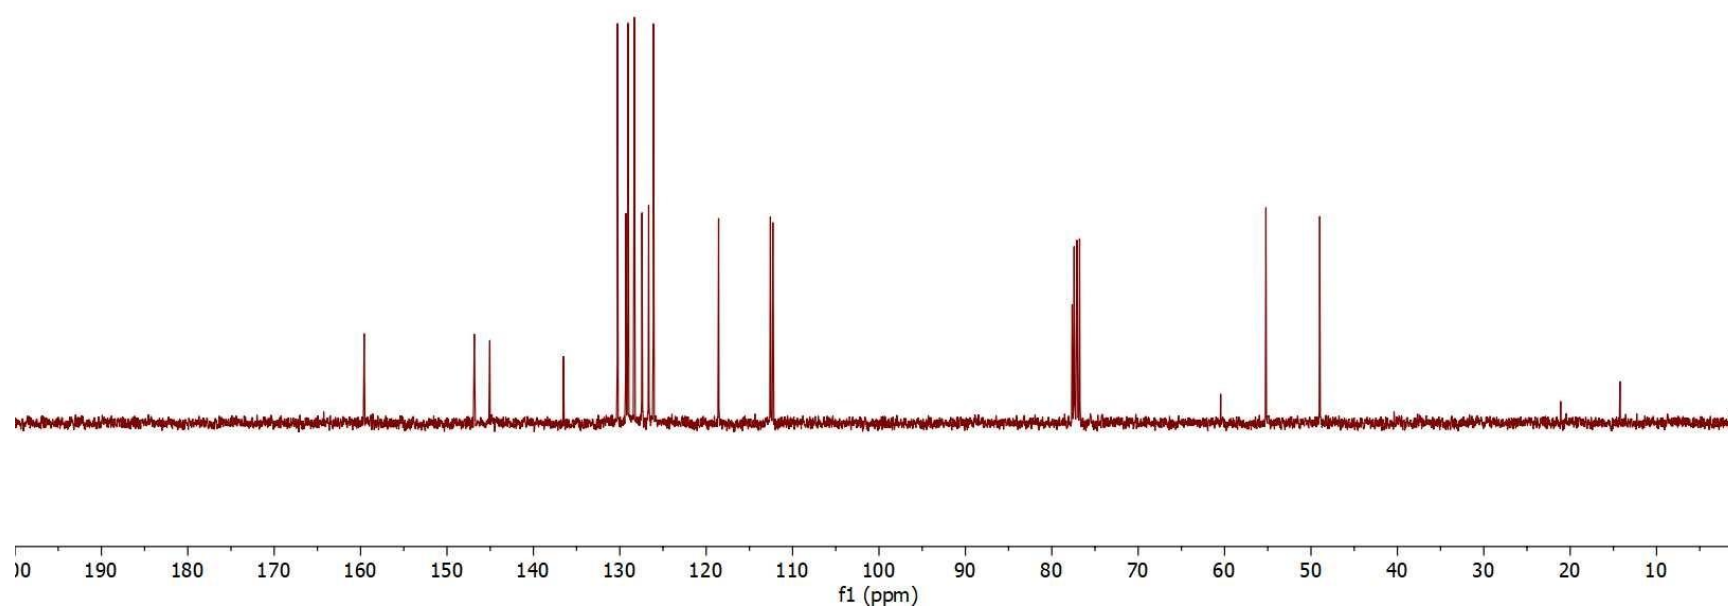

210-3-OMe-h #1-10 RT: 0.01-0.26 AV: 10 NL: 5.89E5  
FTMS + p ESI Full ms [200.00-2000.00]

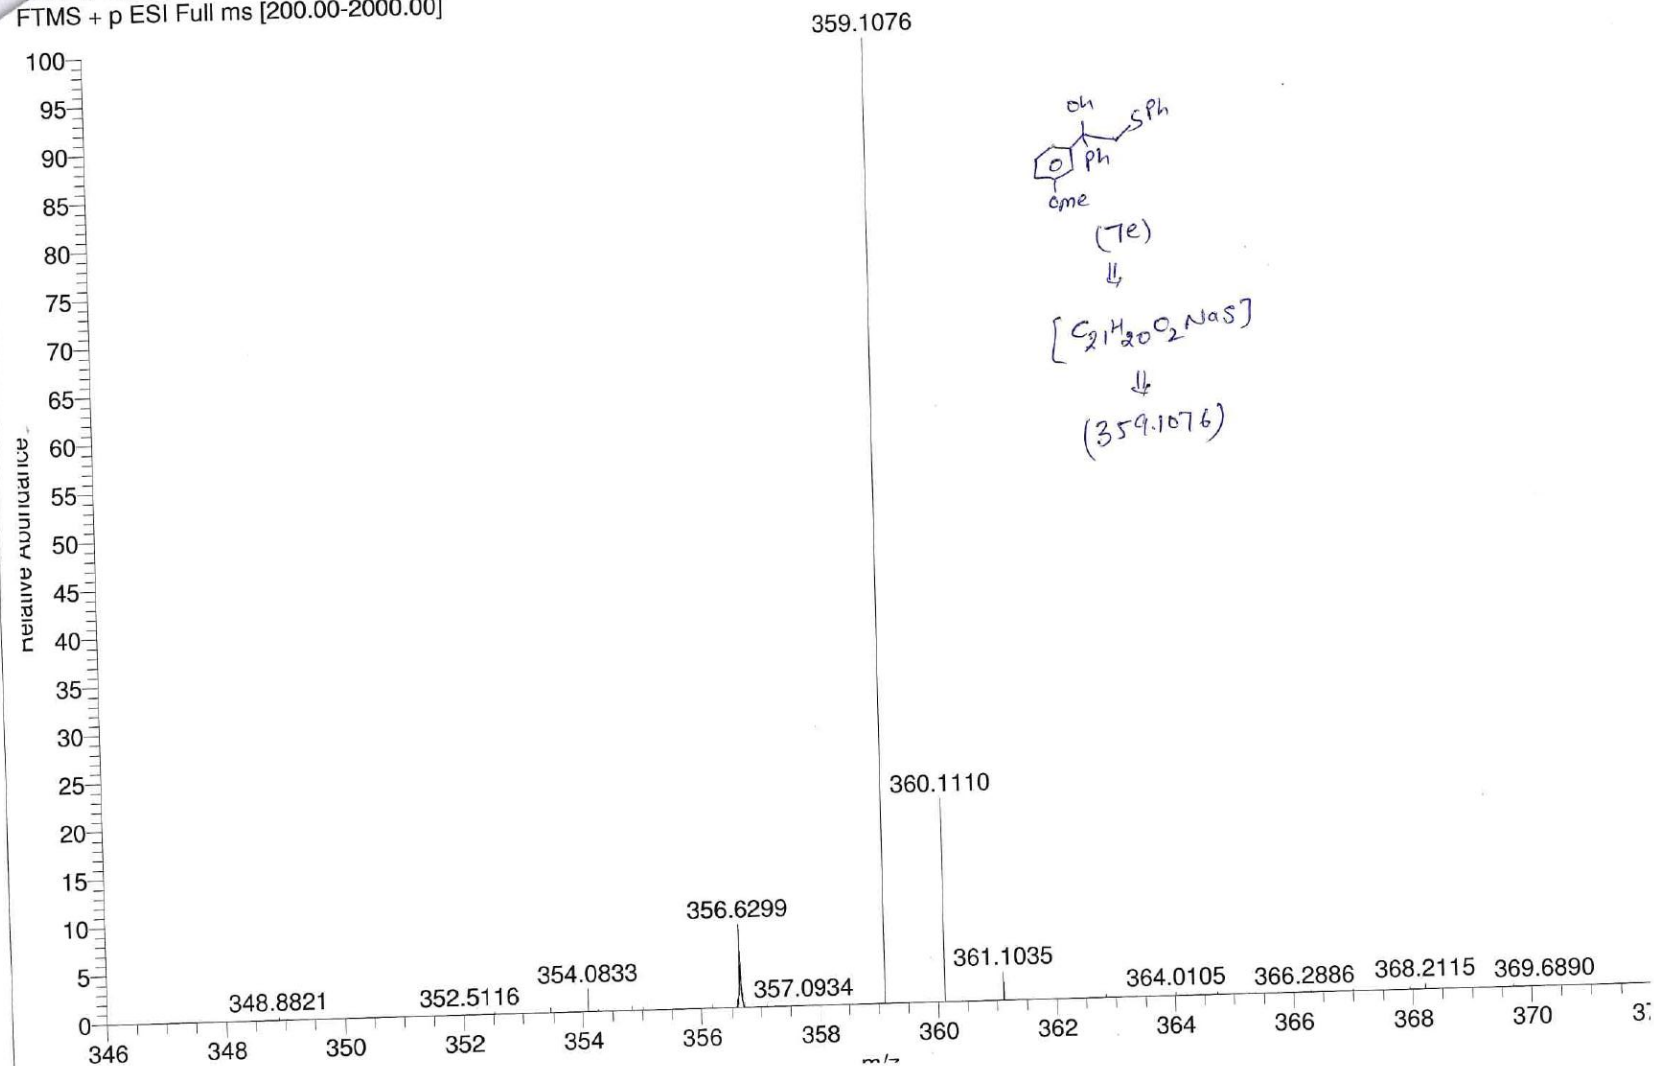

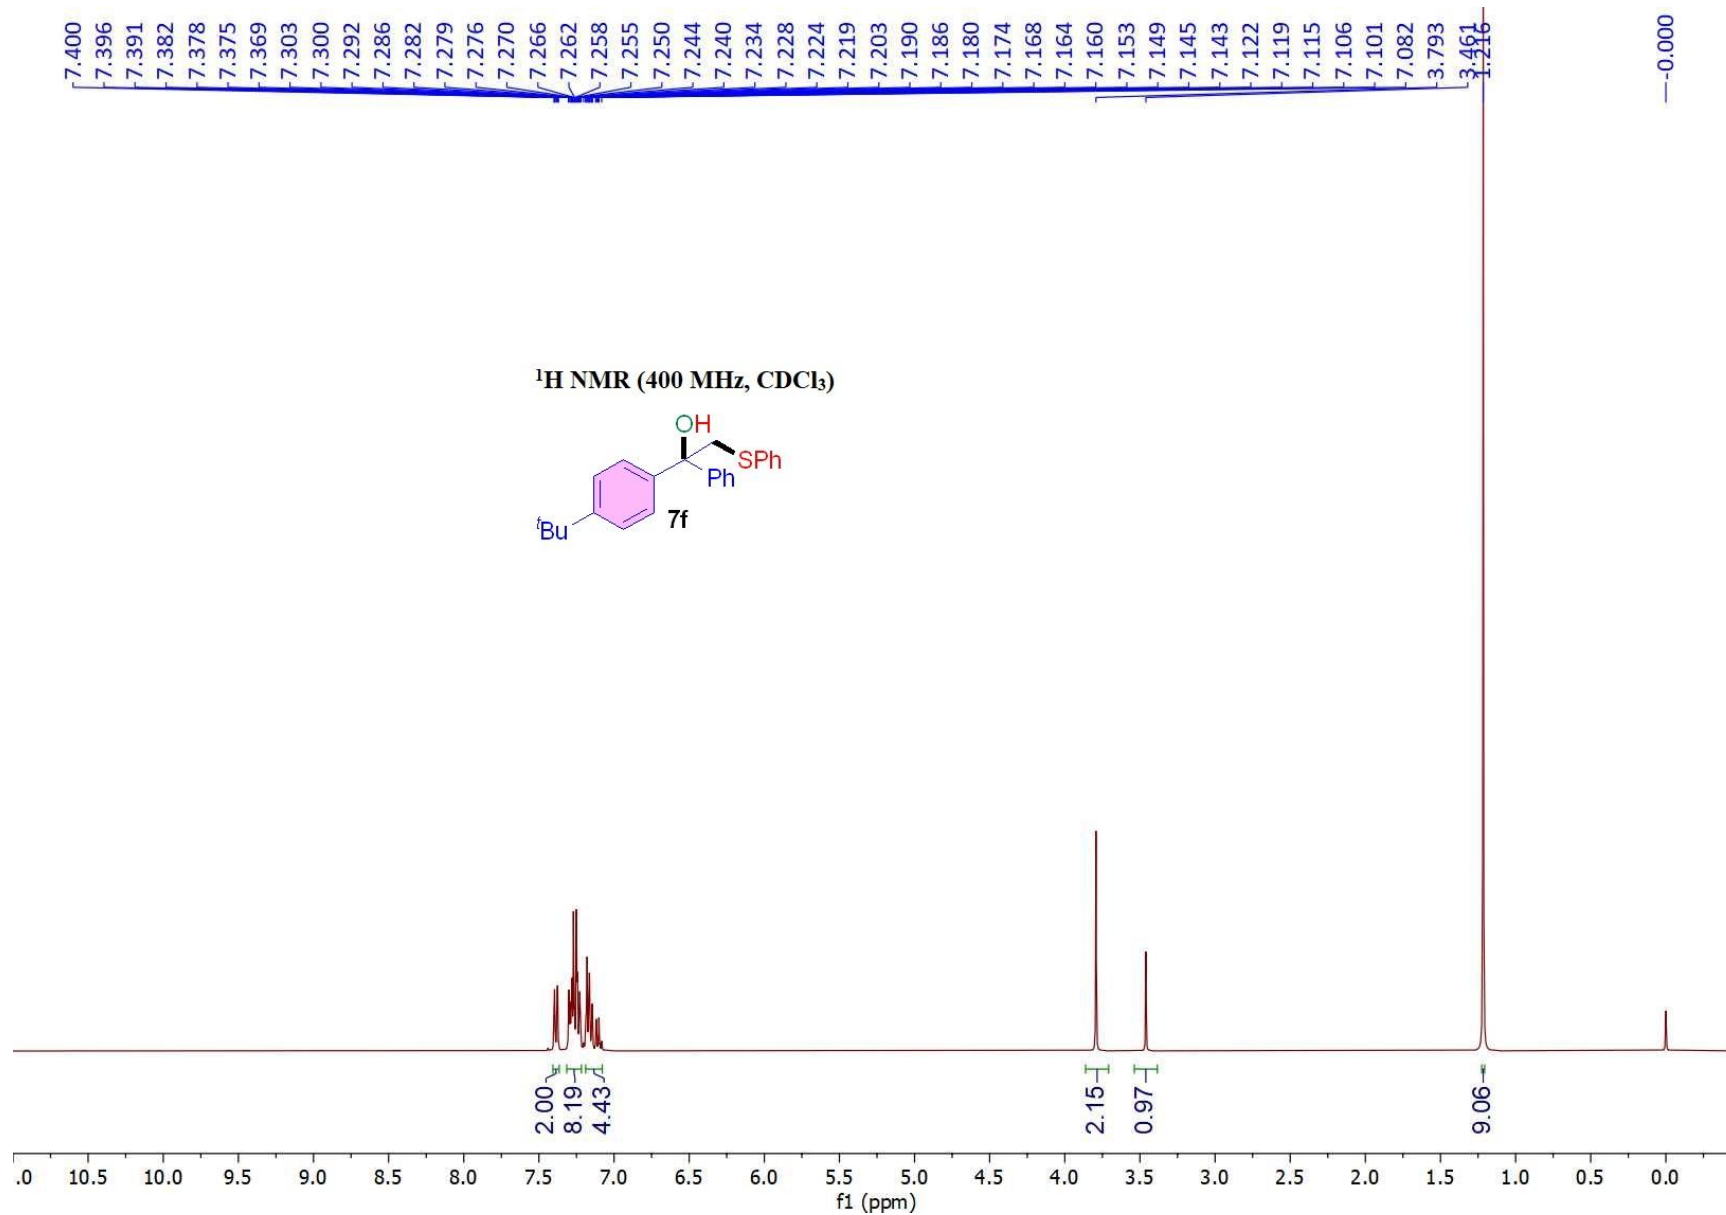

150.86  
145.92  
142.15  
130.31  
129.06  
128.31  
127.36  
126.65  
126.22  
125.86  
125.27

77.59  
77.41  
77.10  
76.78

49.13

34.50  
31.37

$^{13}\text{C}\{\text{H}\}$  NMR (100 MHz,  $\text{CDCl}_3$ )

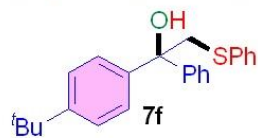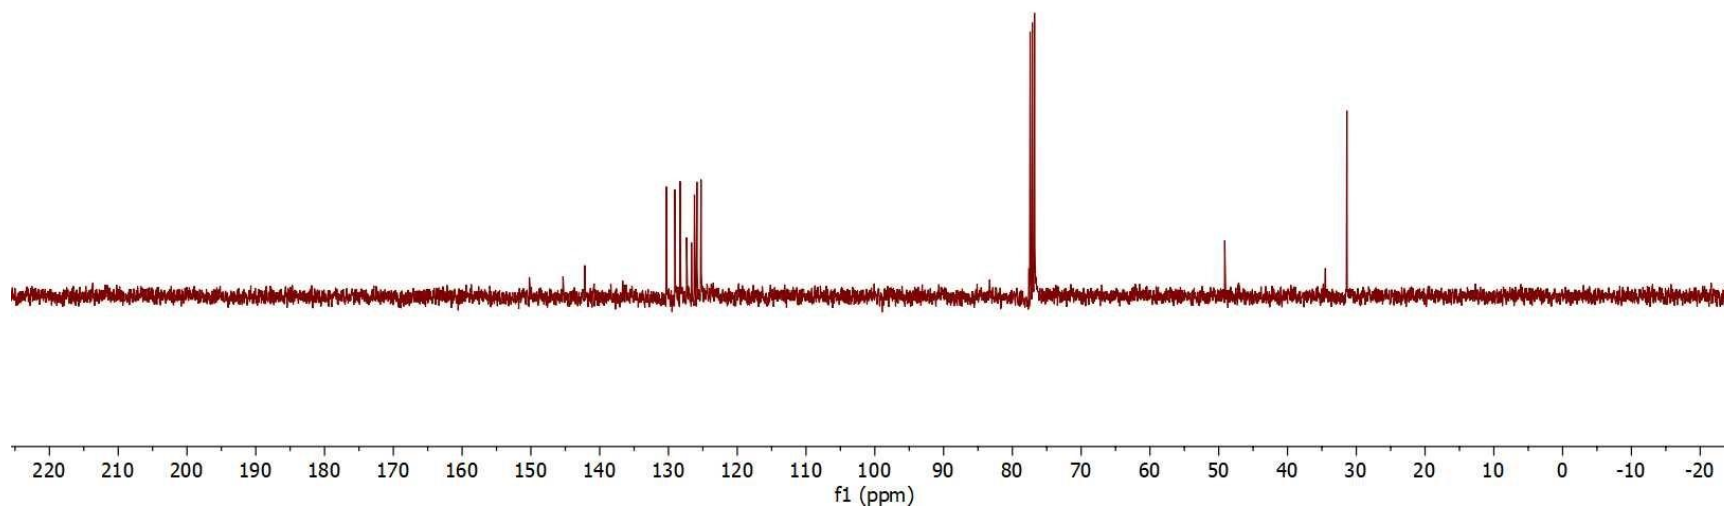

210-4-tBu-H #1-10 RT: 0.02-0.27 AV: 10 NL: 7.27E5  
FTMS + p ESI Full ms [200.00-2000.00]

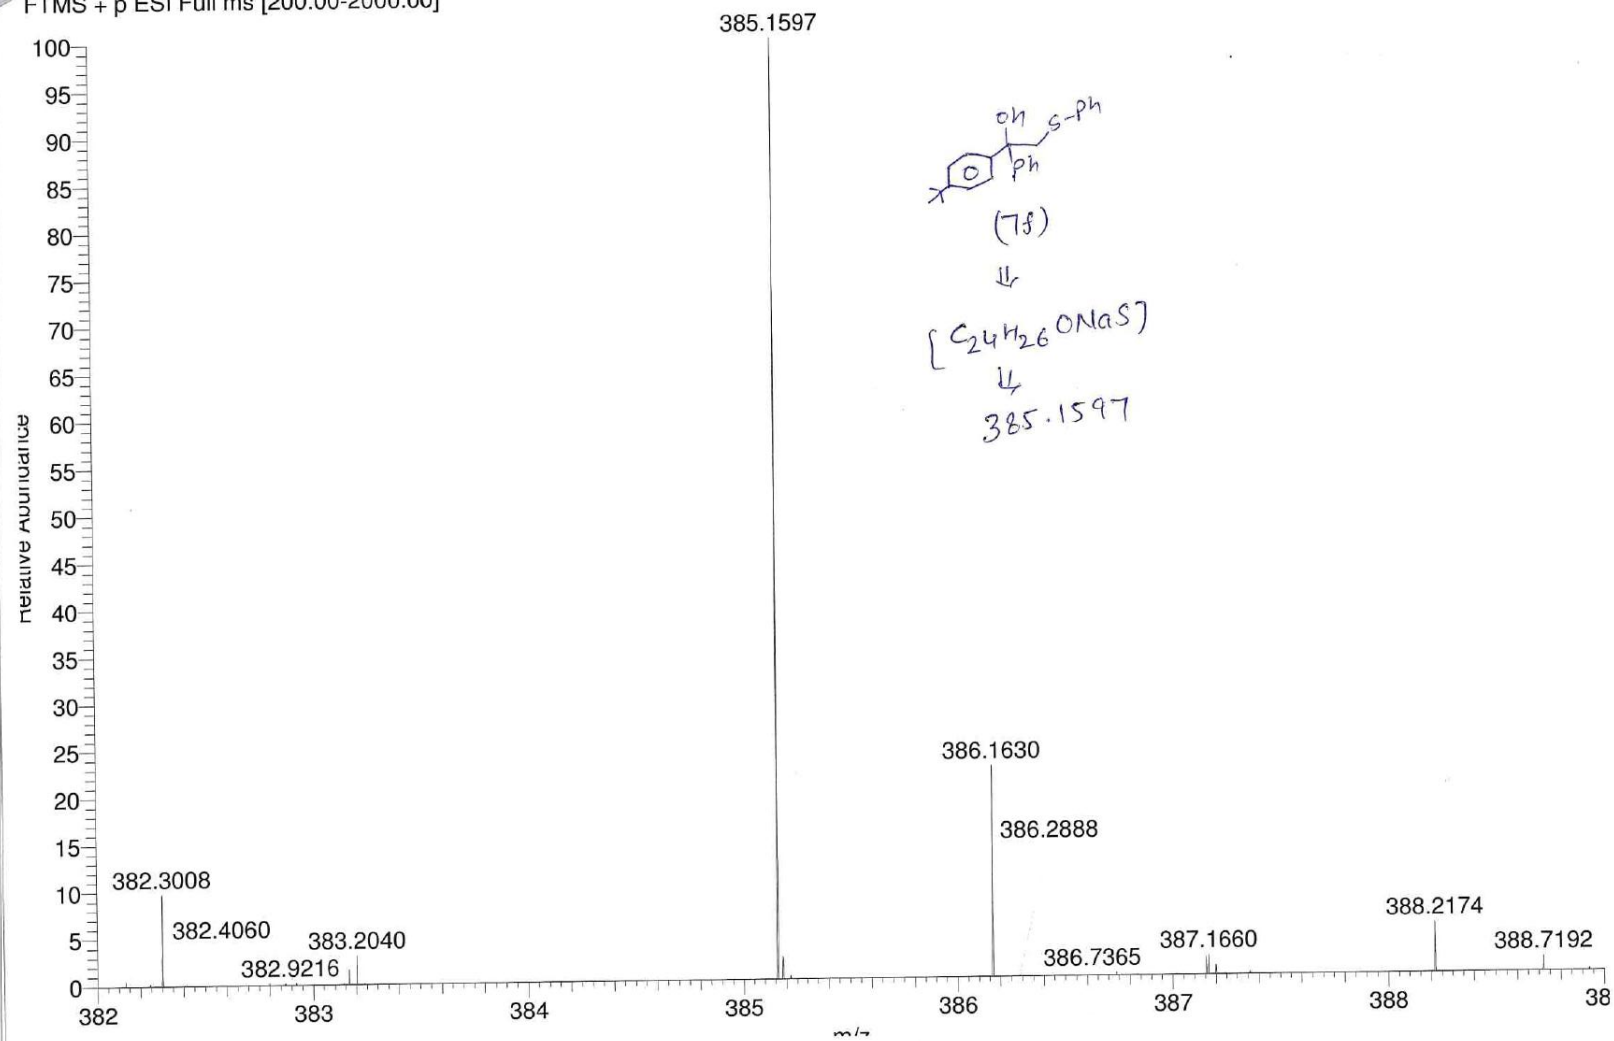

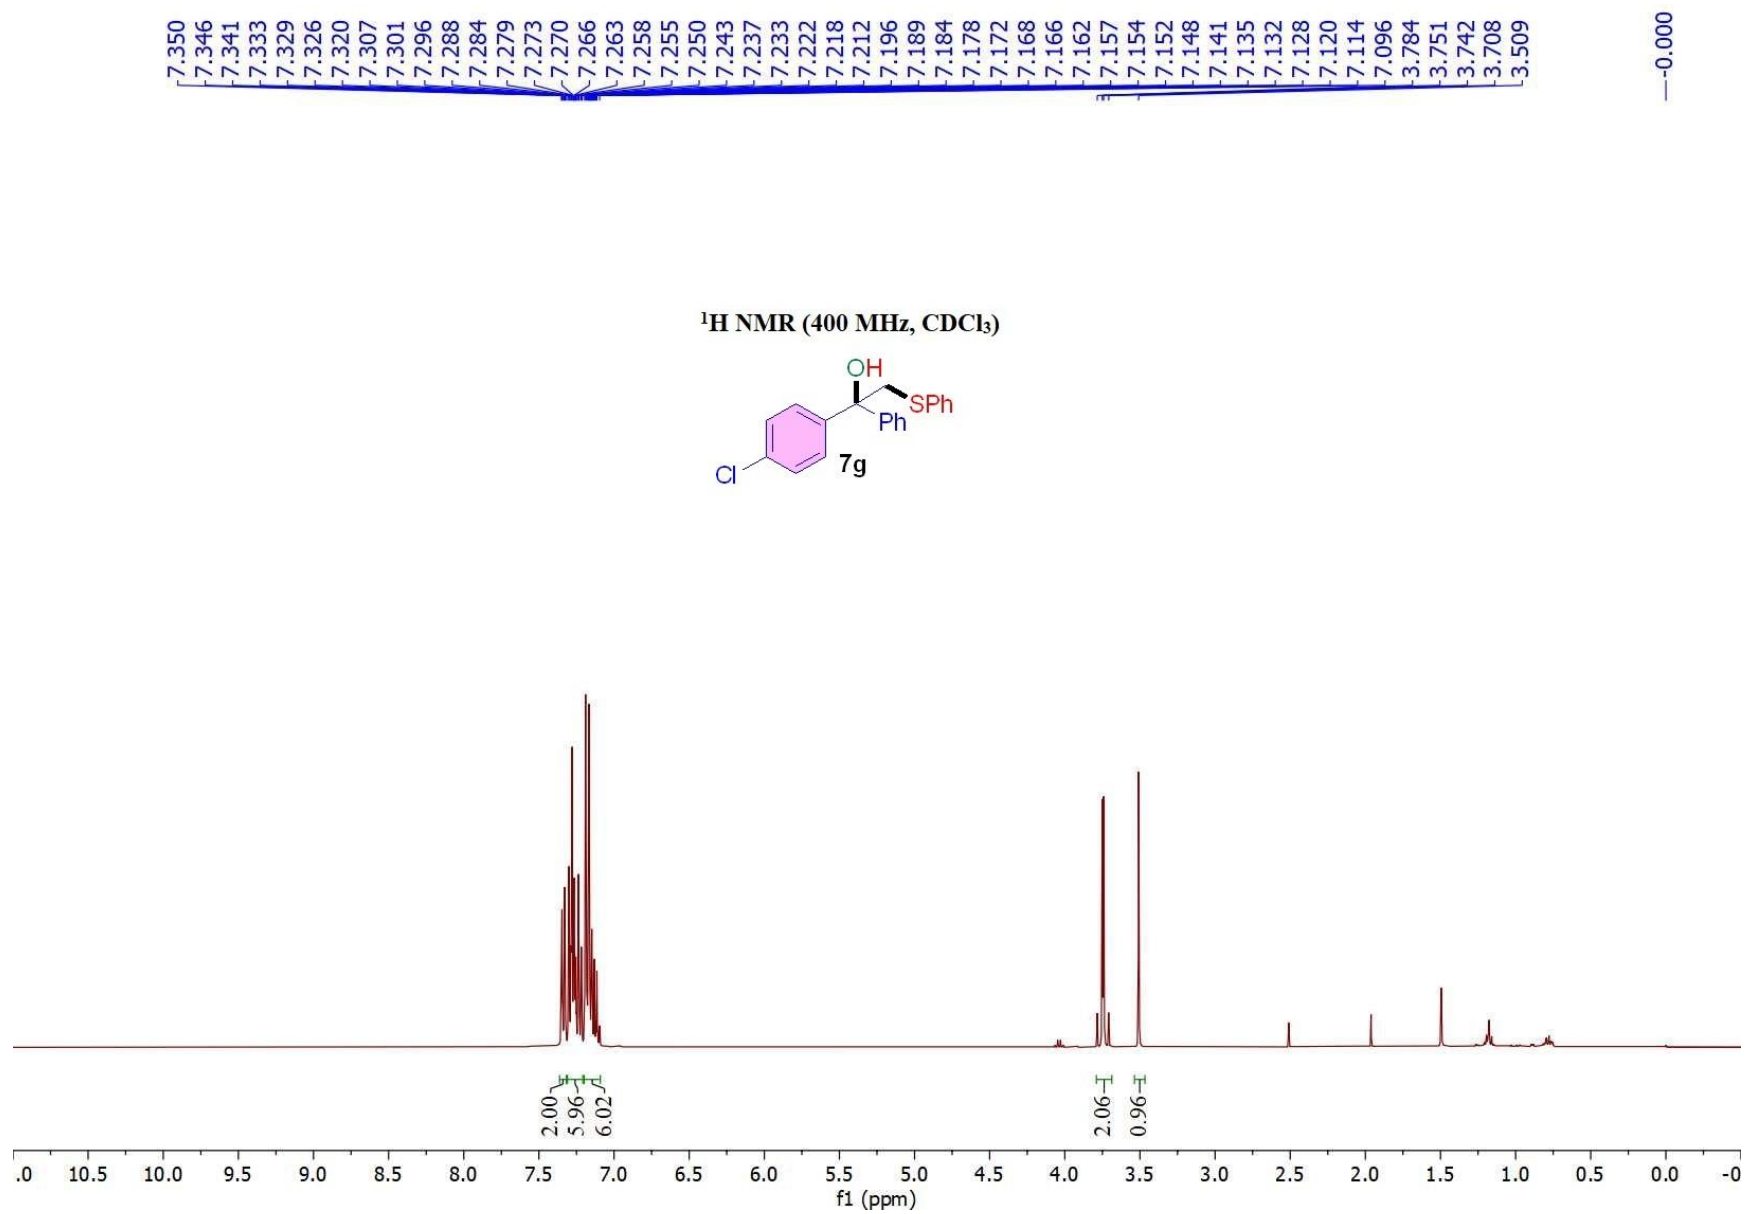

144.76  
143.76  
136.15  
133.30  
130.52  
129.15  
128.48  
128.44  
127.74  
127.66  
126.91  
126.11

77.42  
77.10  
76.78

—49.02

$^{13}\text{C}\{\text{H}\}$  NMR (100 MHz,  $\text{CDCl}_3$ )

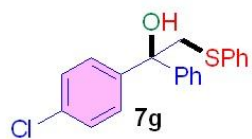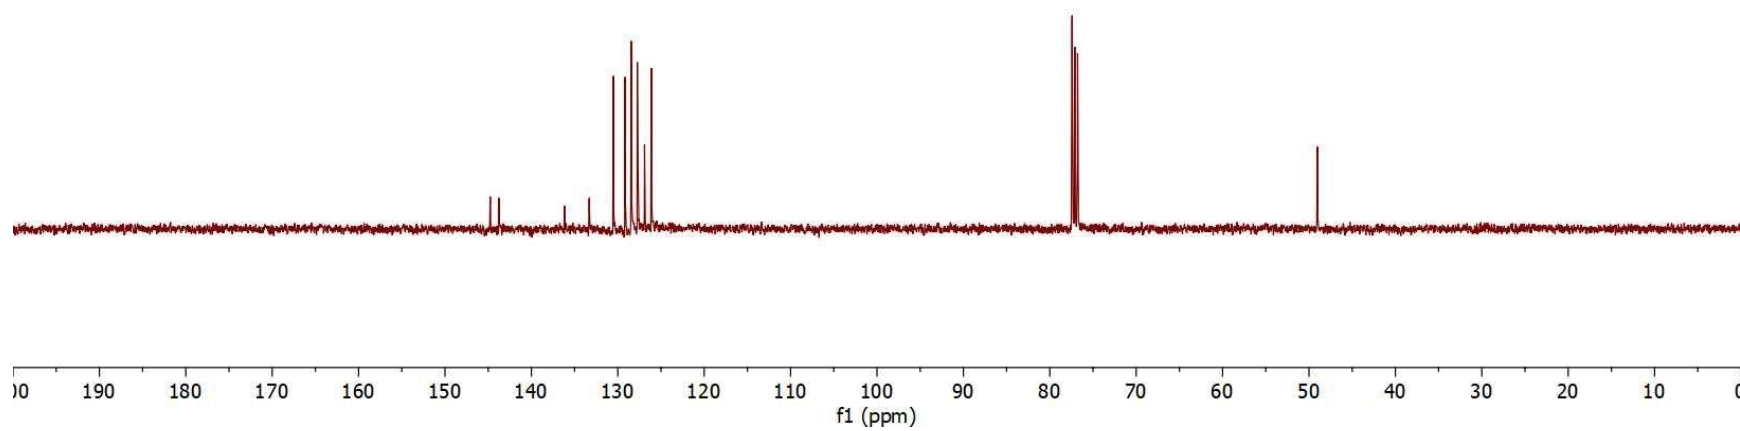

10-4-Cl-H #1-10 RT: 0.00-0.25 AV: 10 NL: 3.70E5  
TMS + p ESI Full ms [200.00-2000.00]

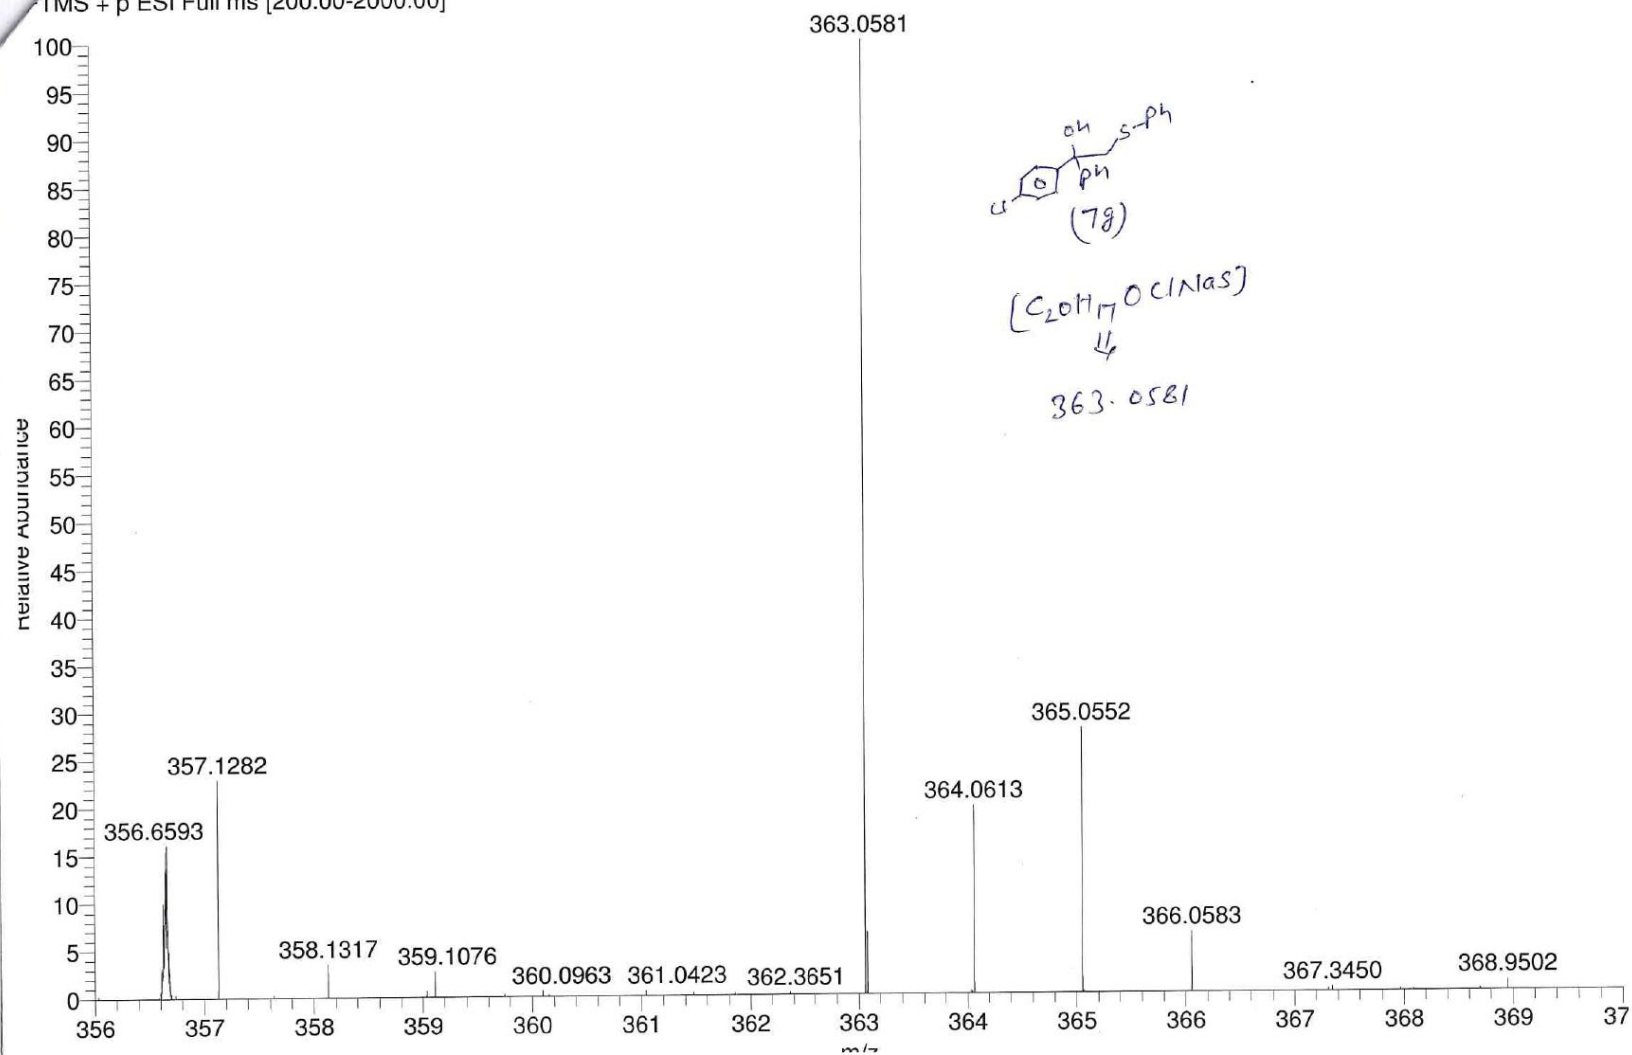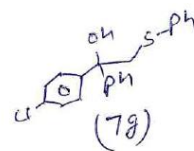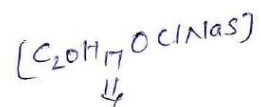

Handwritten value: 363.0581

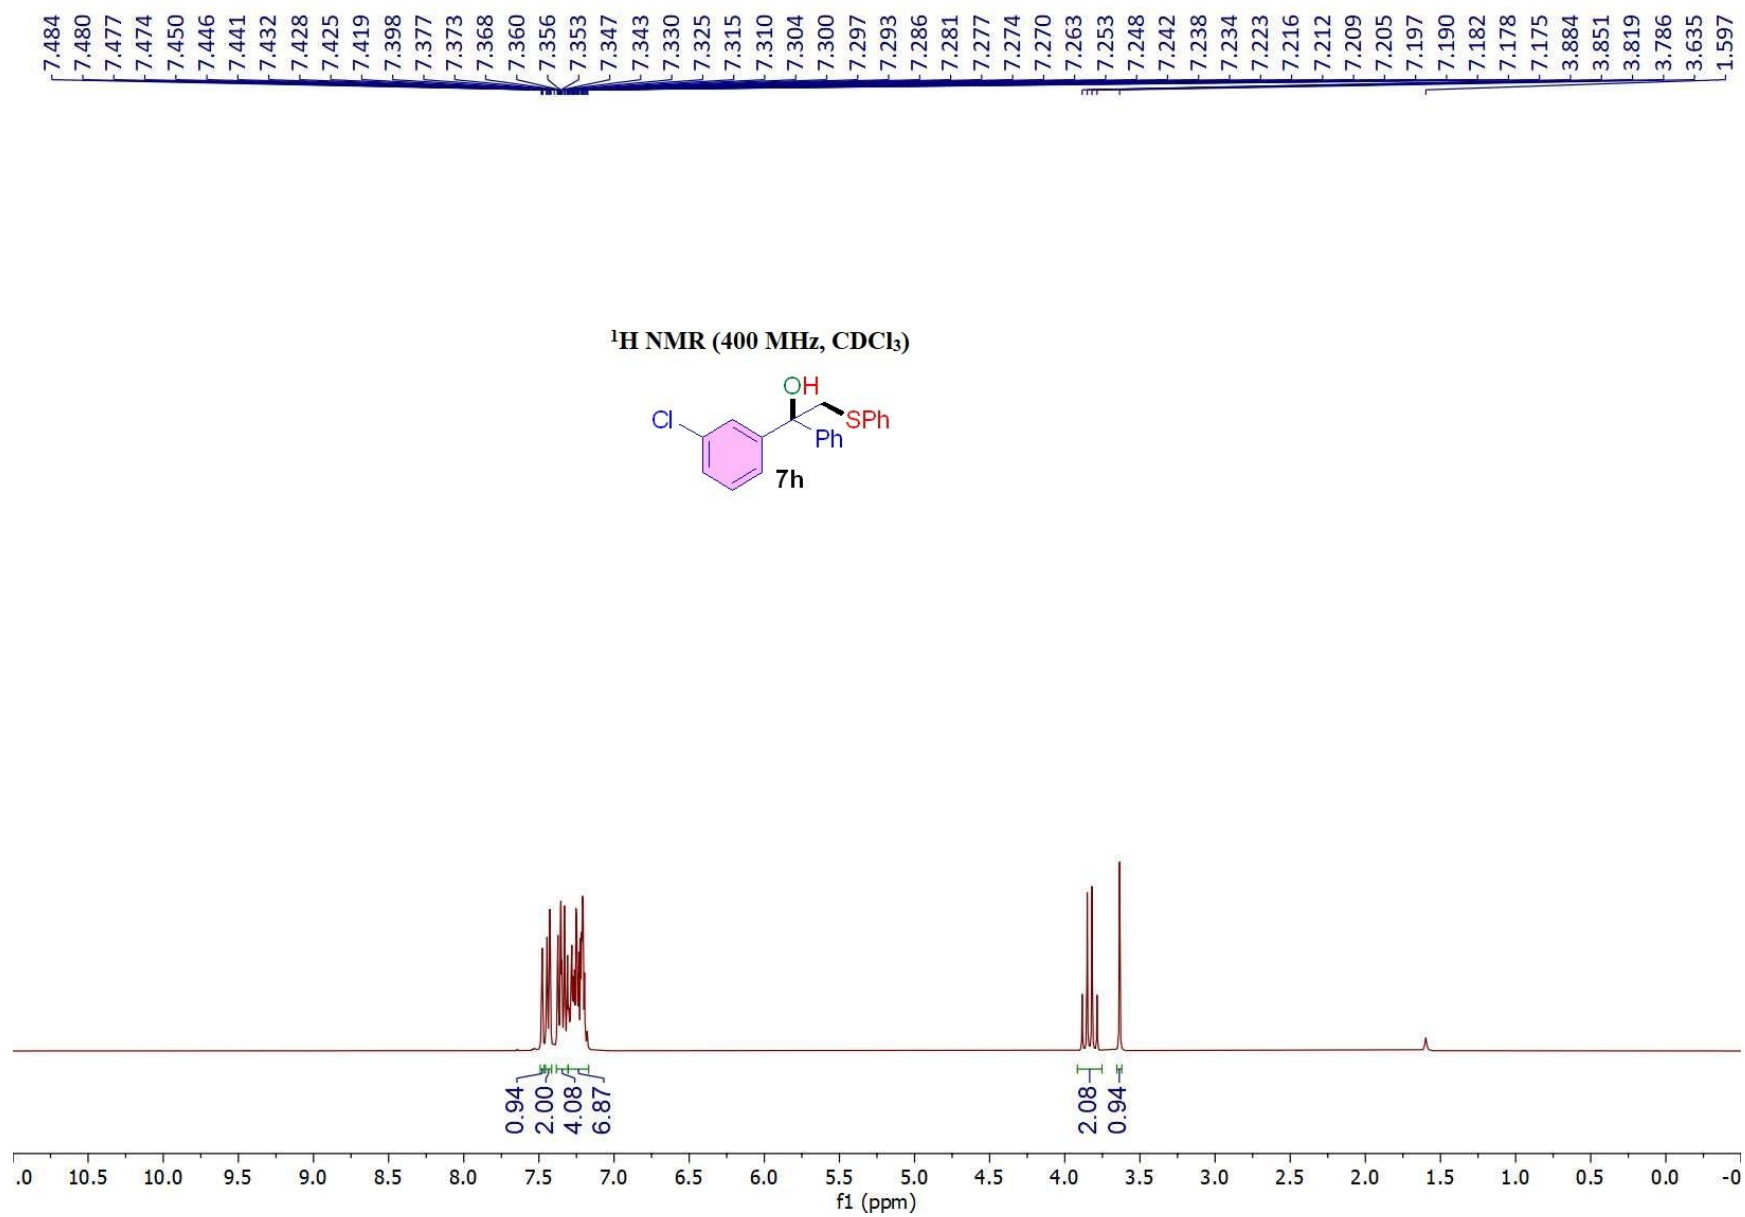

147.29  
144.51  
136.05  
134.38  
130.56  
129.57  
129.15  
128.51  
127.71  
127.57  
126.96  
126.52  
126.10  
124.39

77.42  
77.10  
76.78

60.49

48.93

$^{13}\text{C}\{\text{H}\}$  NMR (100 MHz,  $\text{CDCl}_3$ )

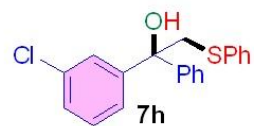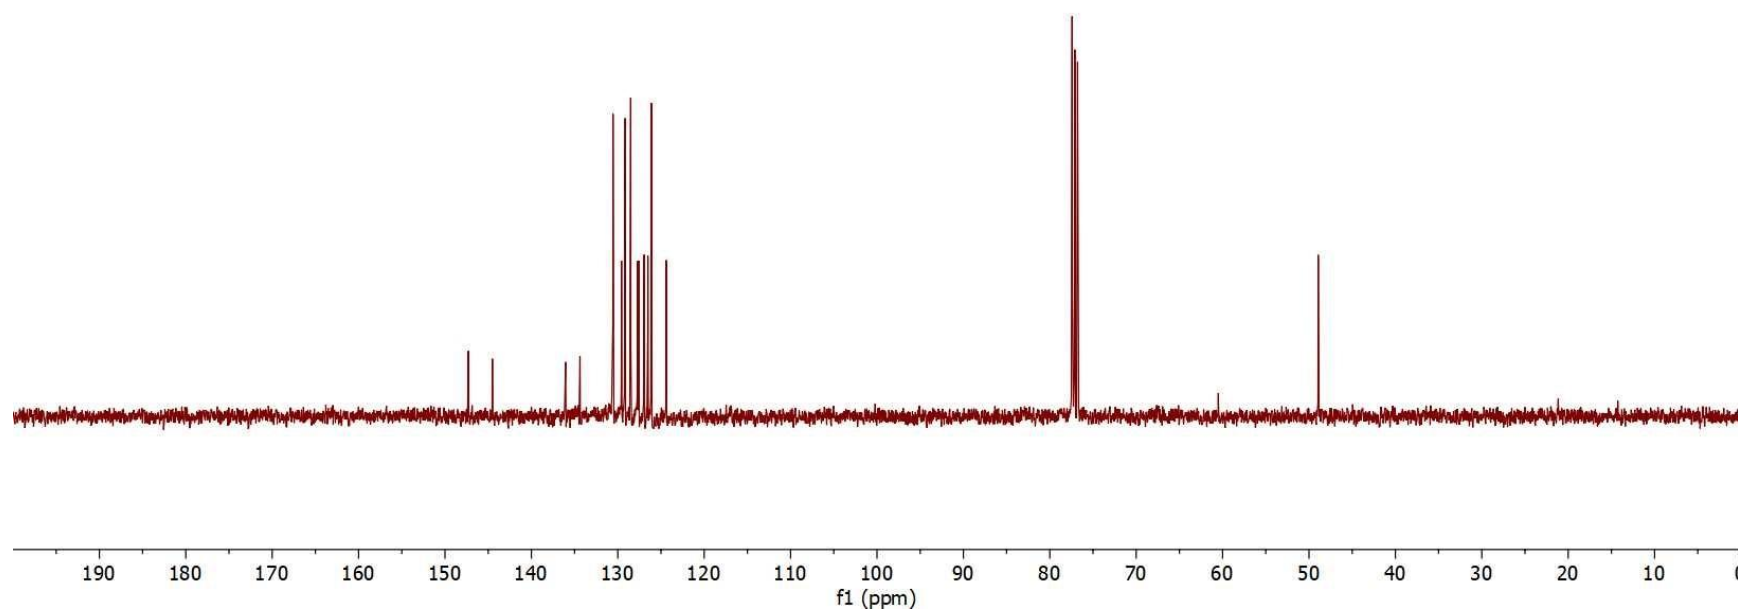

10-3-Cl-P-1-10 RT: 0.01-0.23 AV: 10 NL: 3.90E3  
FTMS + p ESI Full ms [200.00-2000.00]

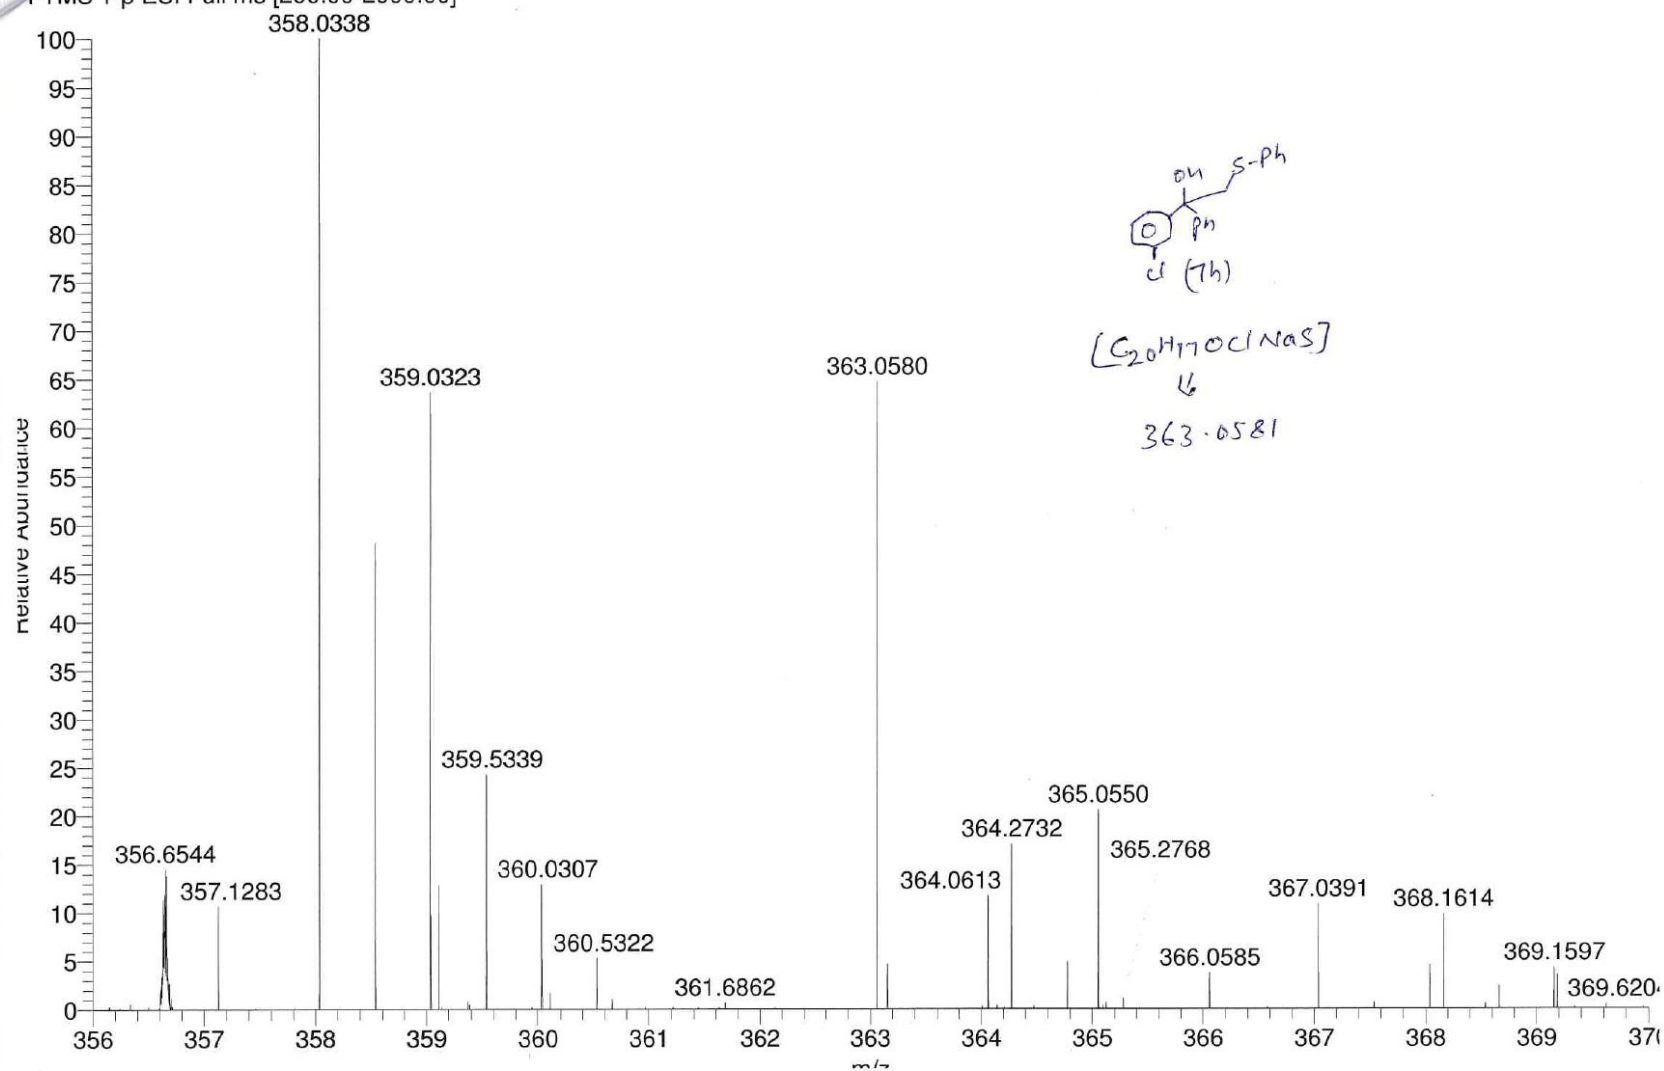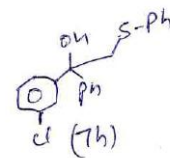

$[C_{20}H_{17}OClNaS]$

363.0581

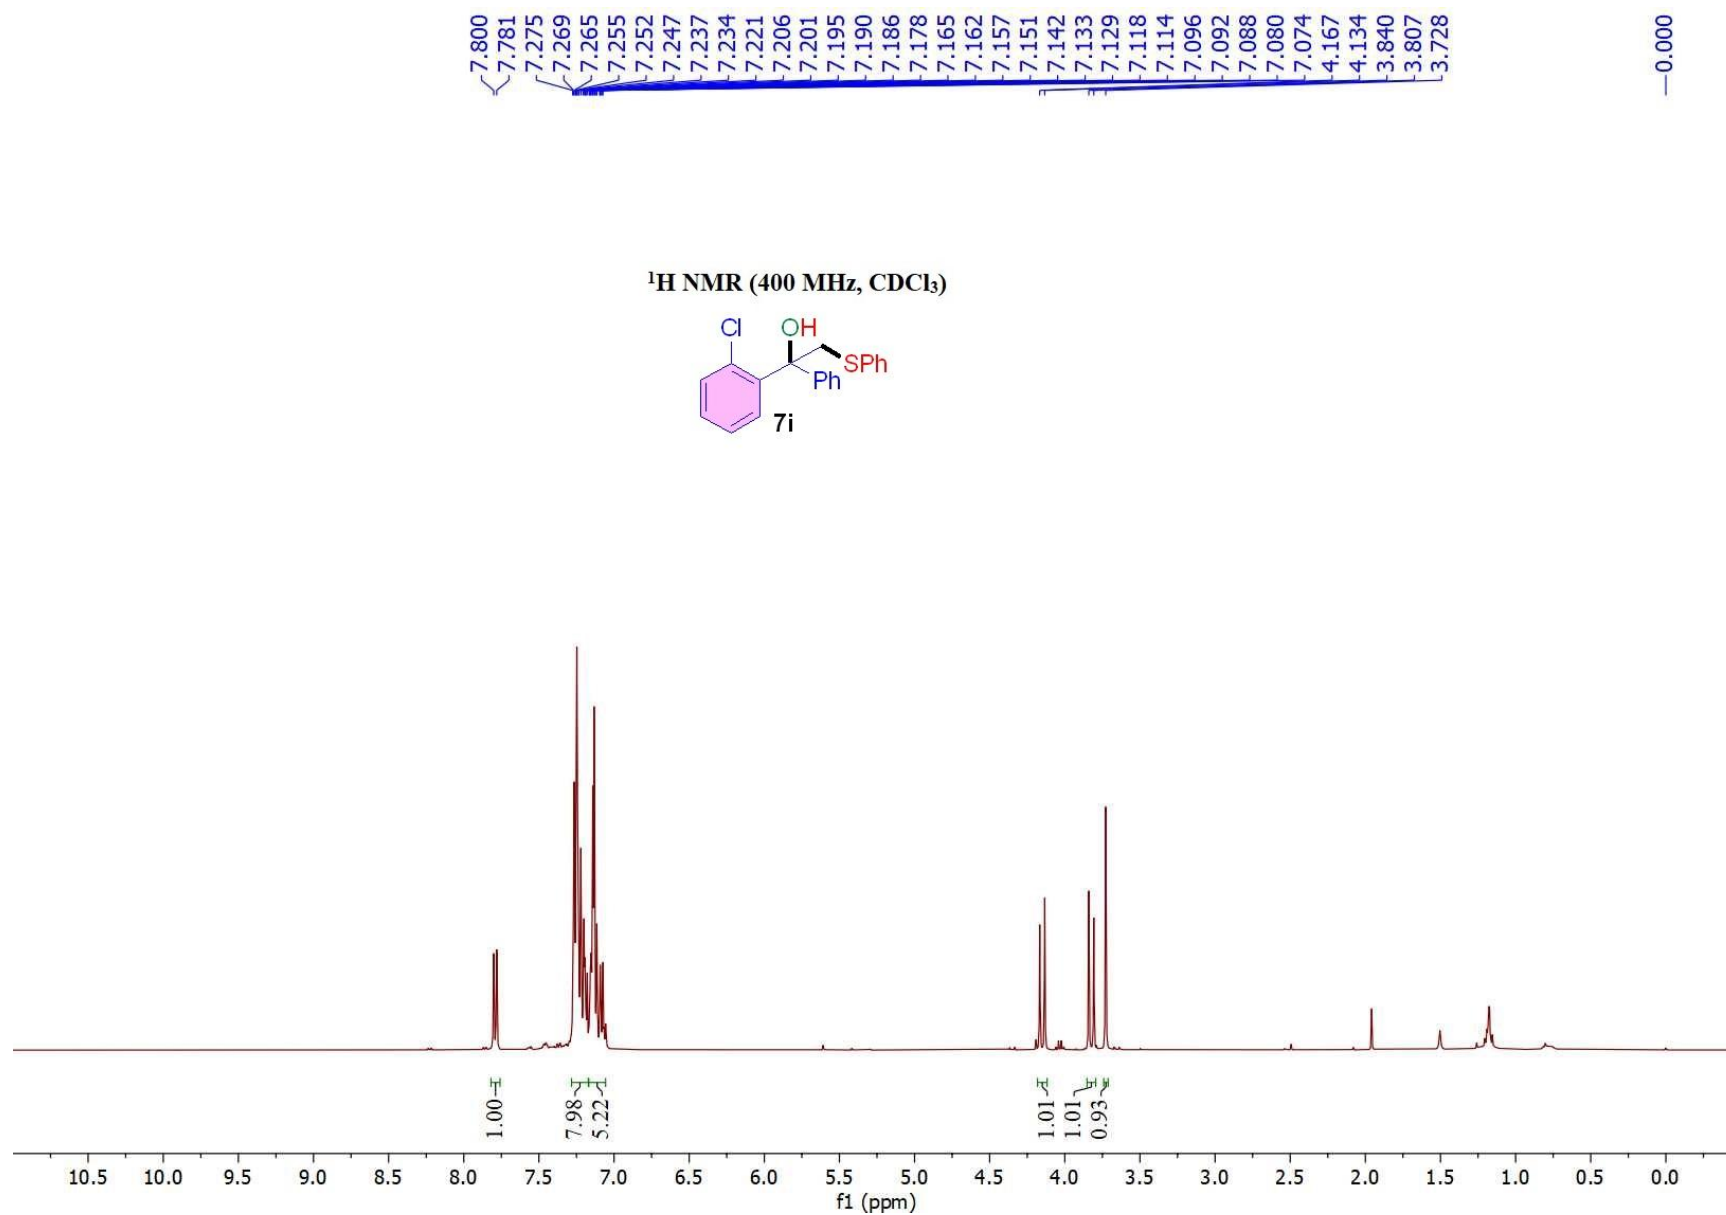

144.16  
141.30  
136.29  
132.59  
131.52  
130.38  
129.26  
128.94  
128.86  
128.20  
127.65  
126.62  
126.60  
126.50

78.04  
77.42  
77.10  
76.78

46.32

$^{13}\text{C}\{^1\text{H}\}$  NMR (100 MHz,  $\text{CDCl}_3$ )

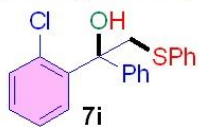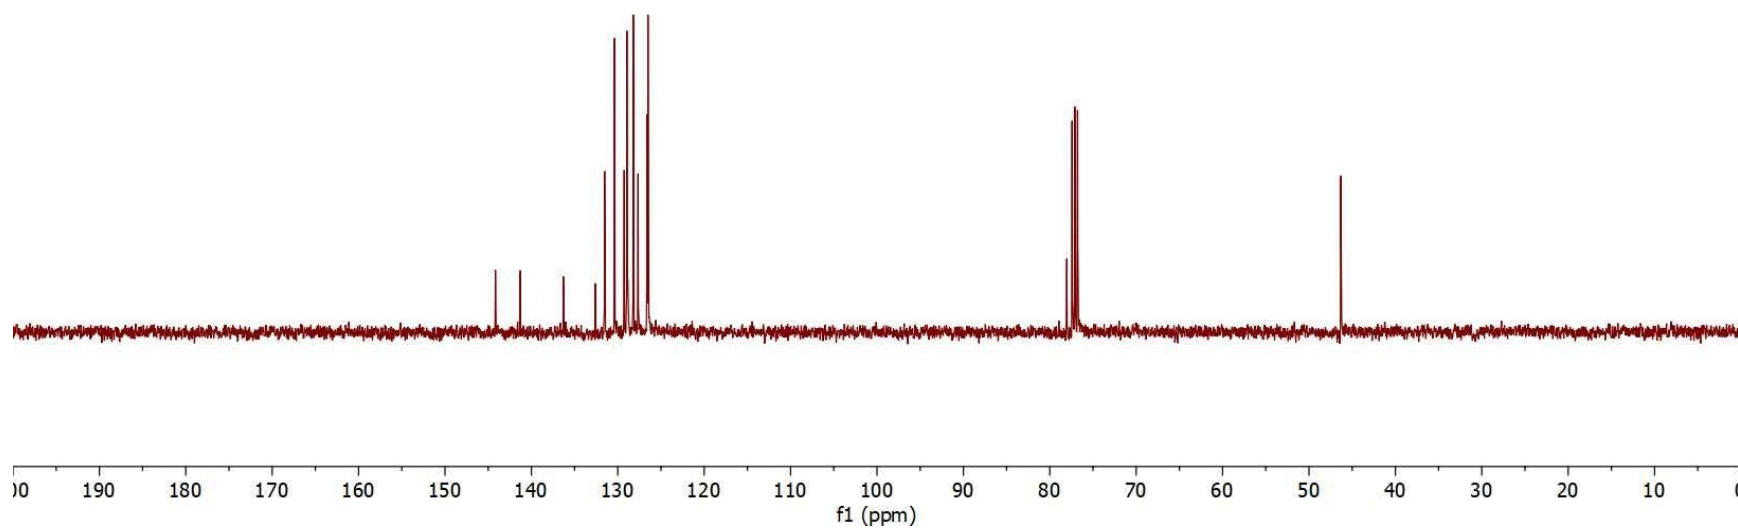

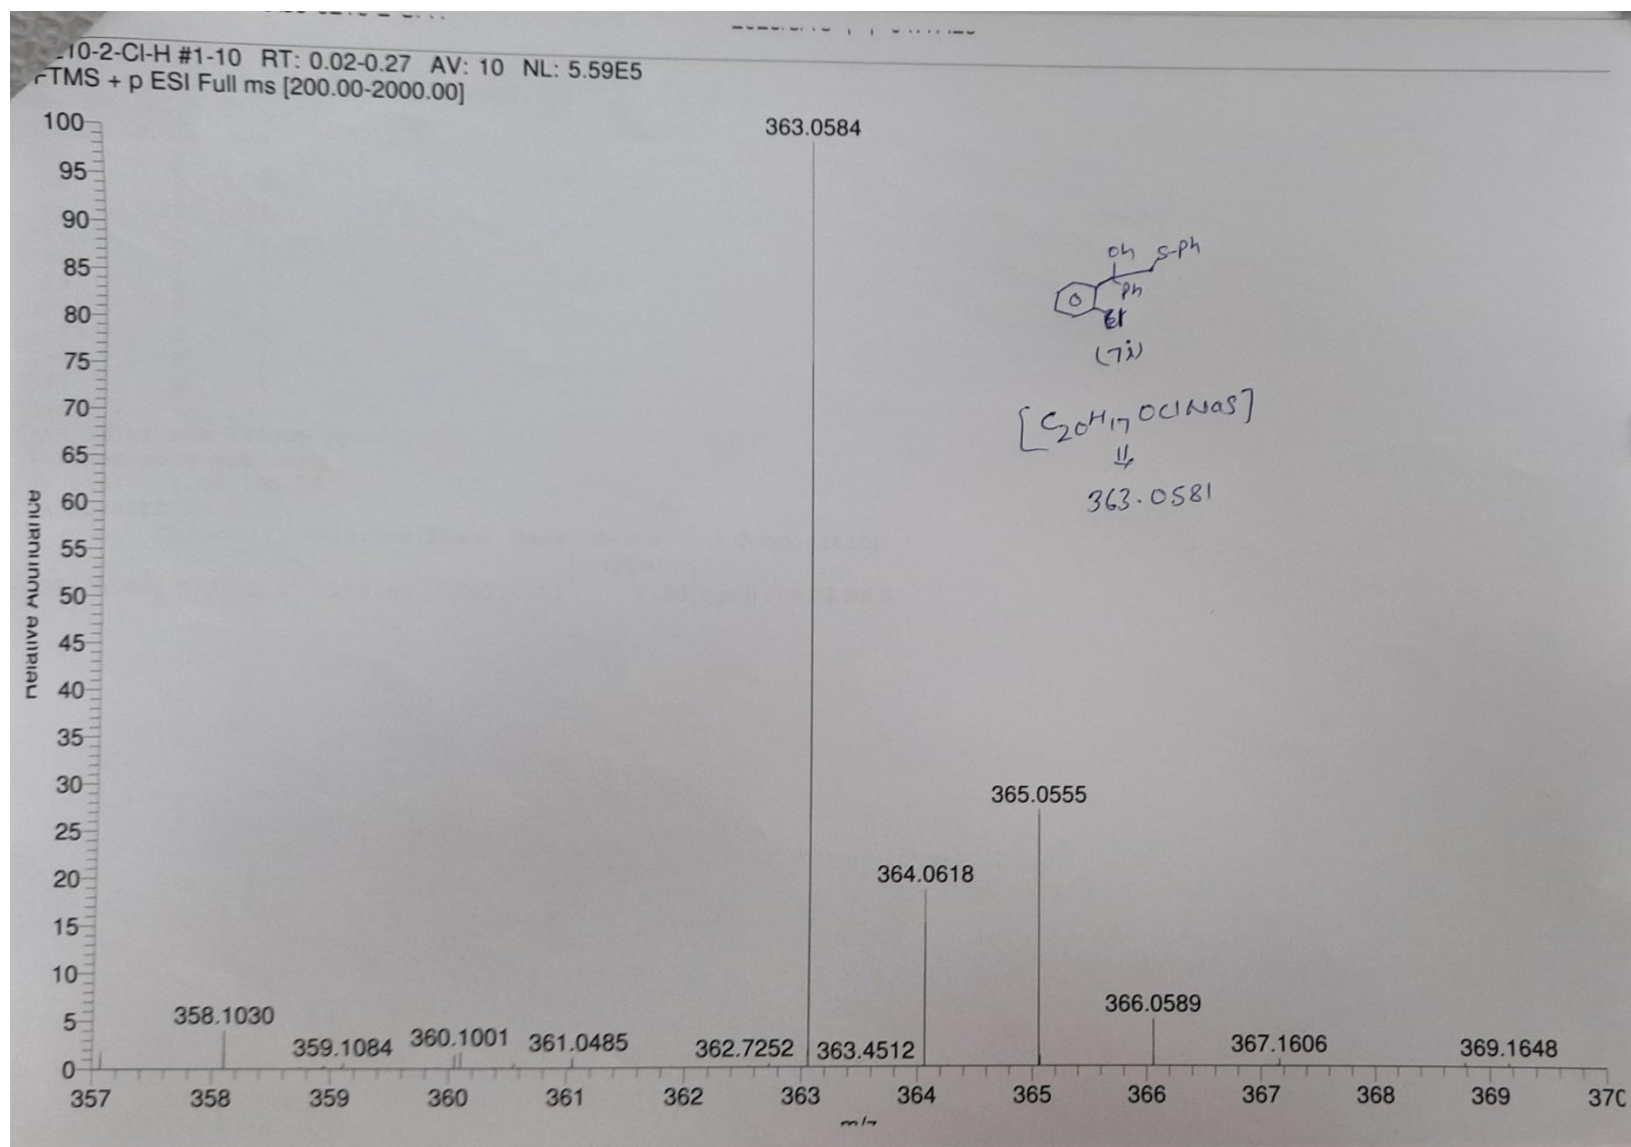

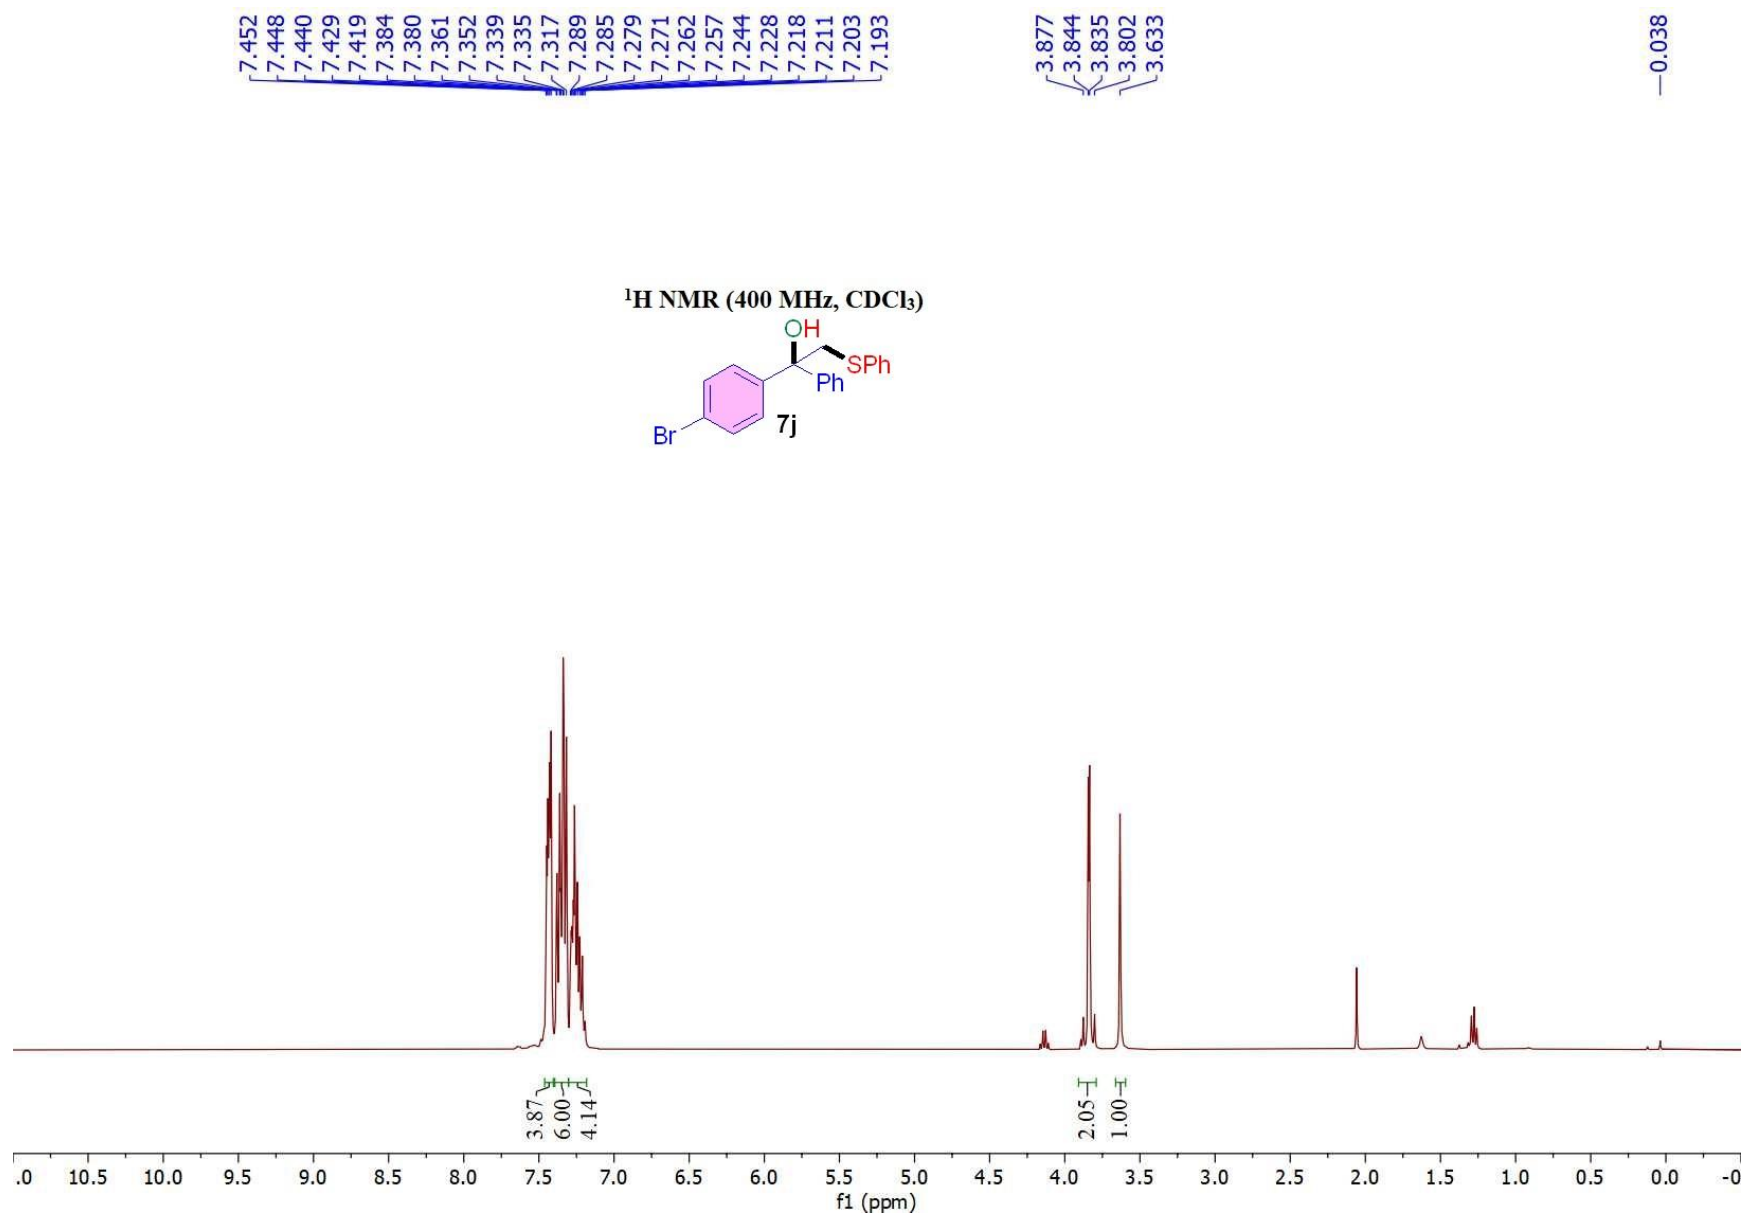

144.65  
144.25  
136.10  
131.34  
130.46  
129.11  
128.44  
128.05  
127.63  
126.85  
126.07  
121.48

77.42  
77.10  
76.78

—48.87

$^{13}\text{C}\{\text{H}\}$  NMR (100 MHz,  $\text{CDCl}_3$ )

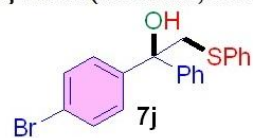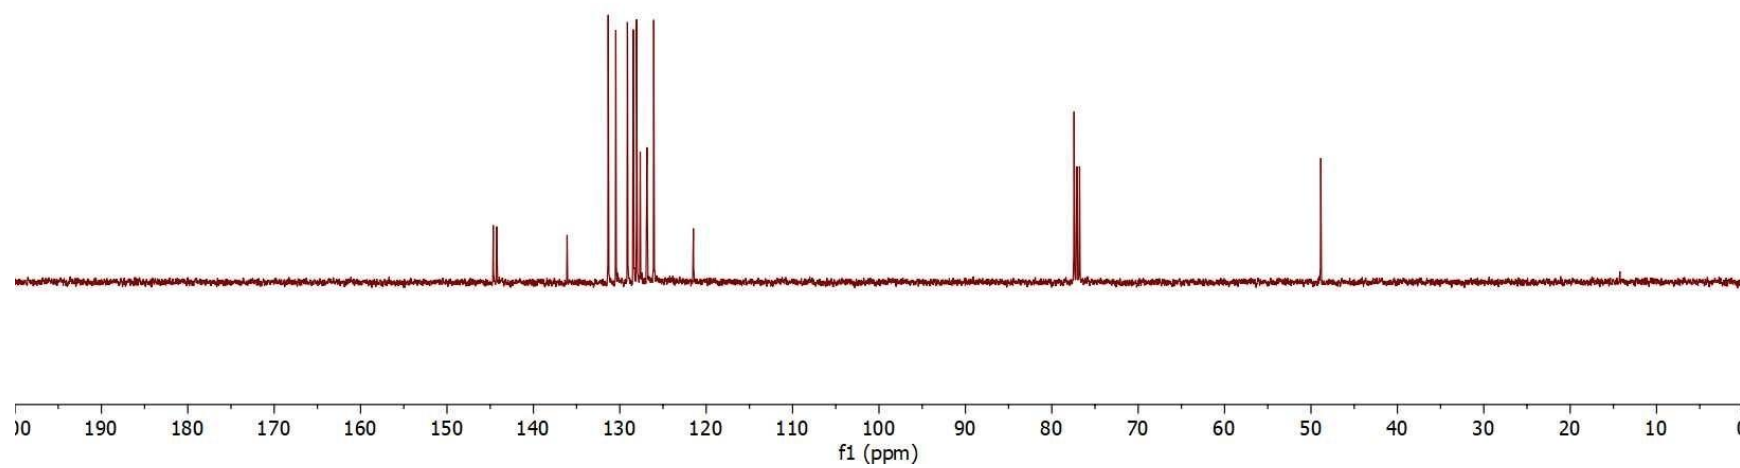

0312-4-Br-H#1-10 RT: 0.02-0.27 AV: 10 NL: 1.0/E0  
FTMS + p ESI Full ms [200.00-2000.00]

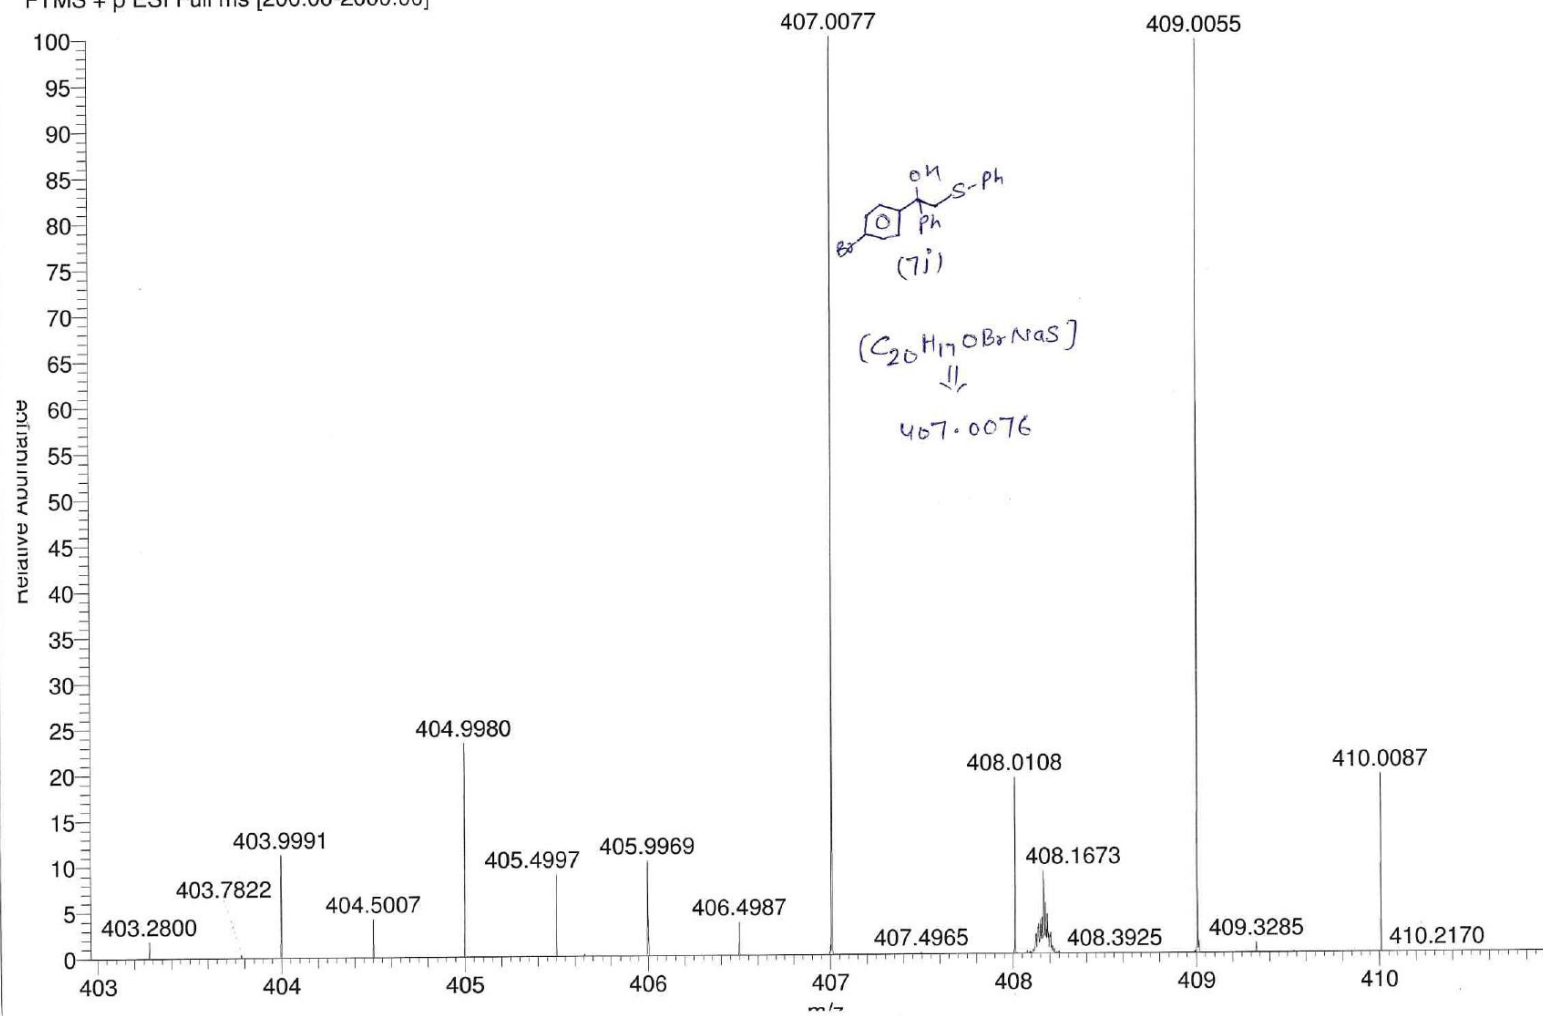

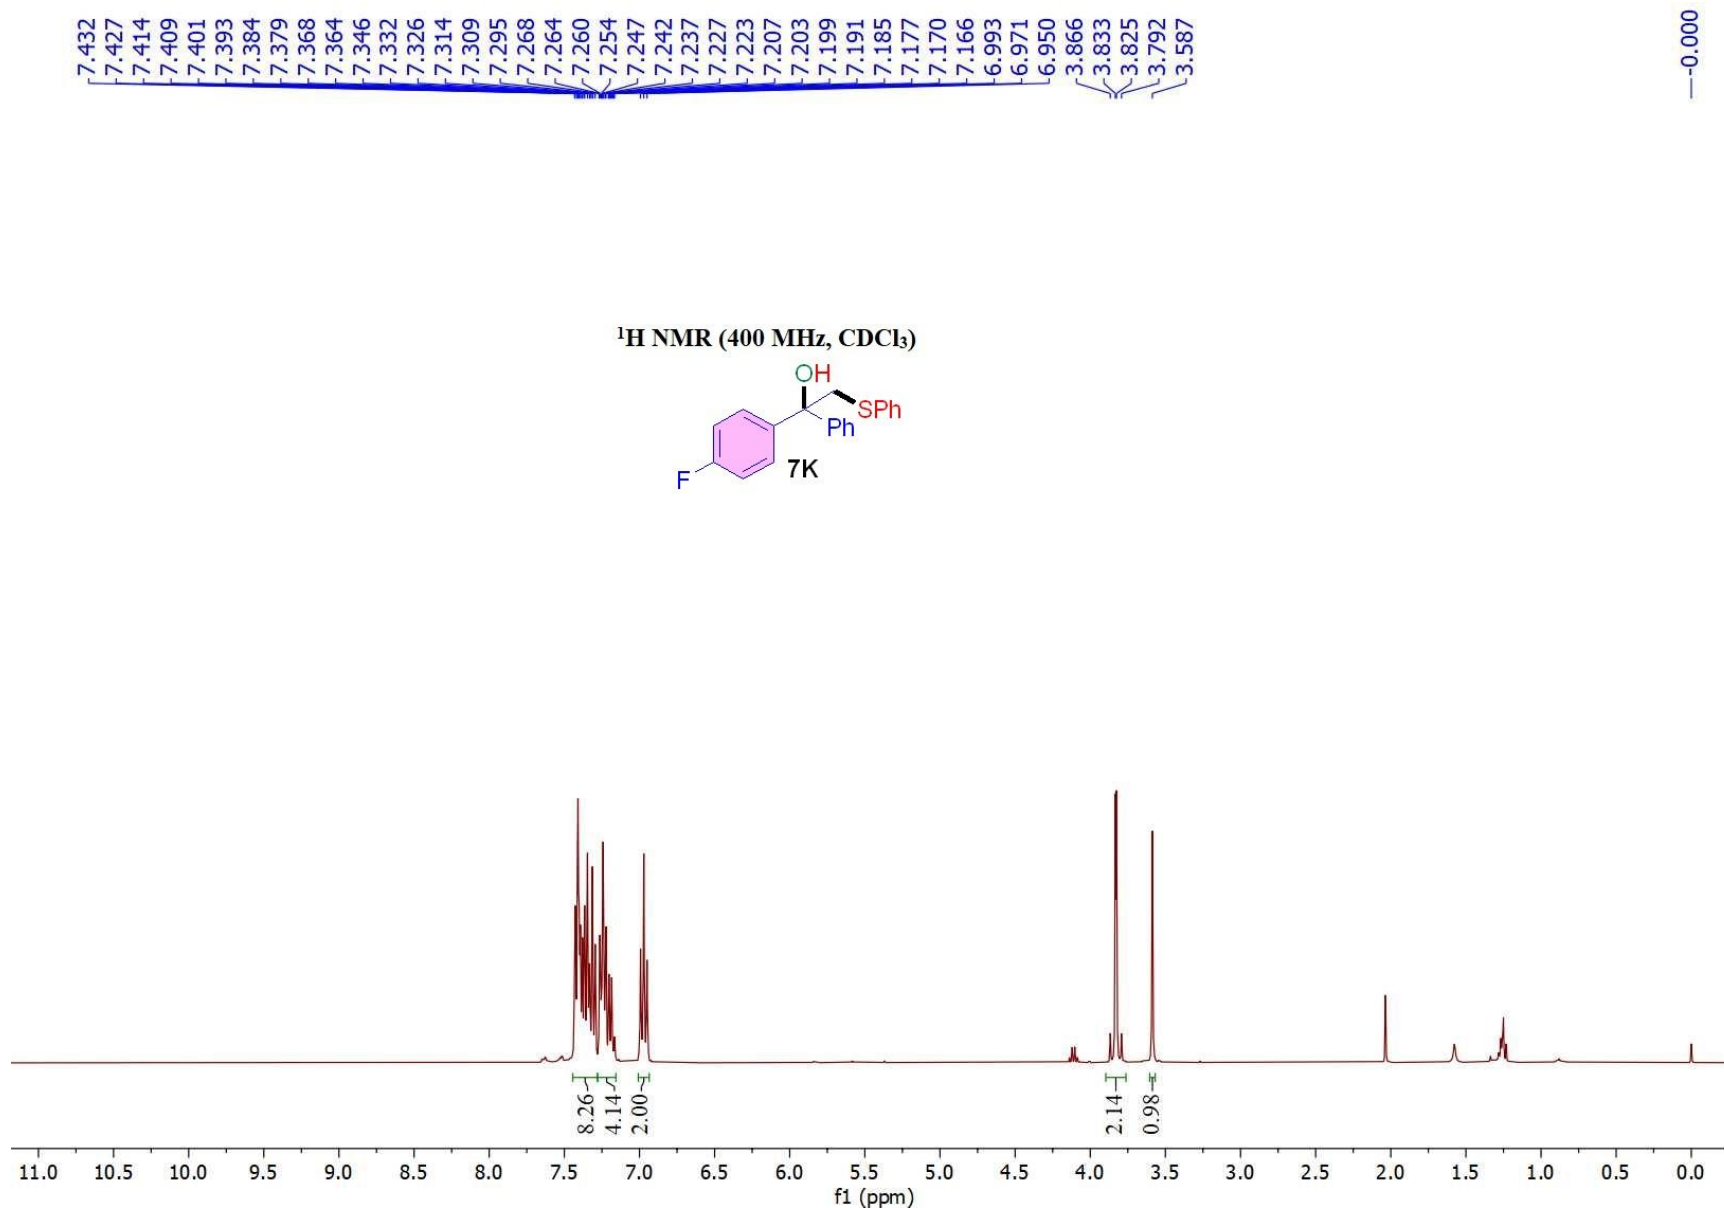

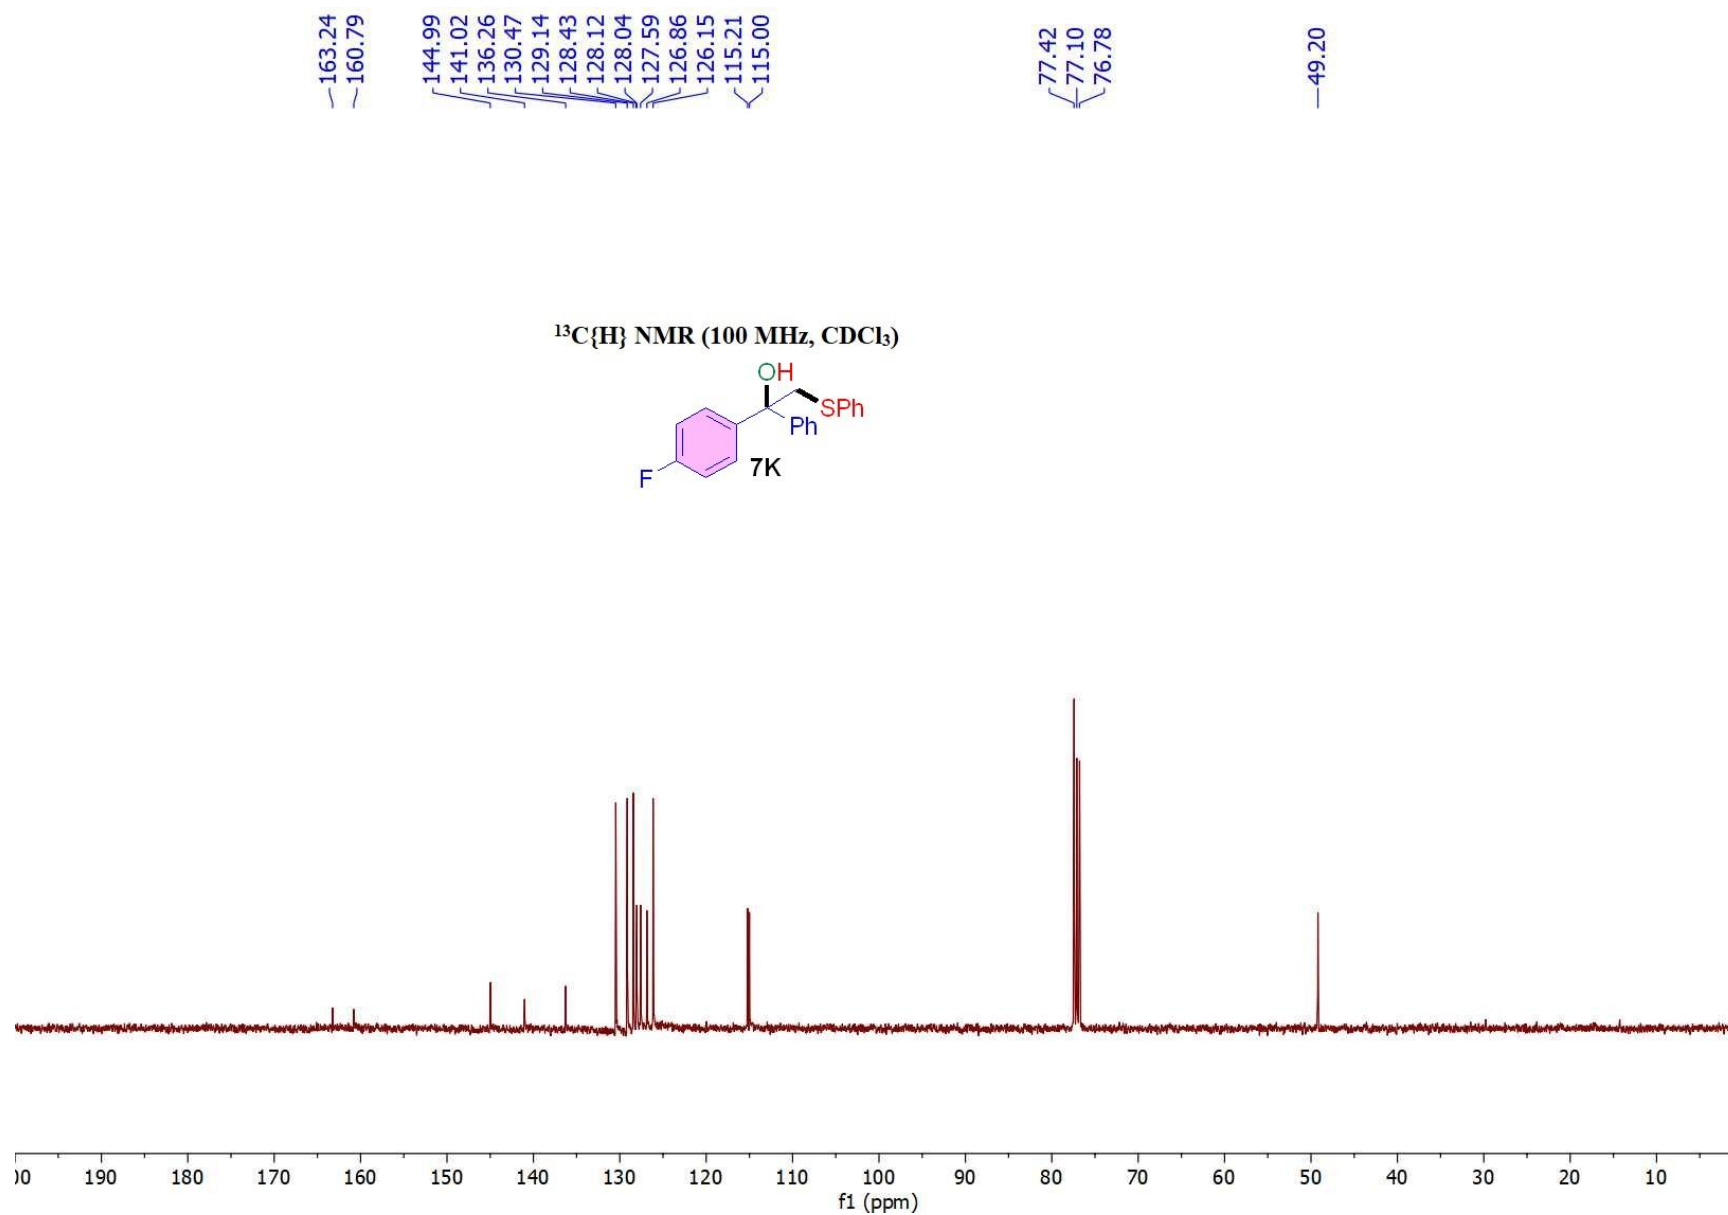

0227-4-dorodiphenyl-p

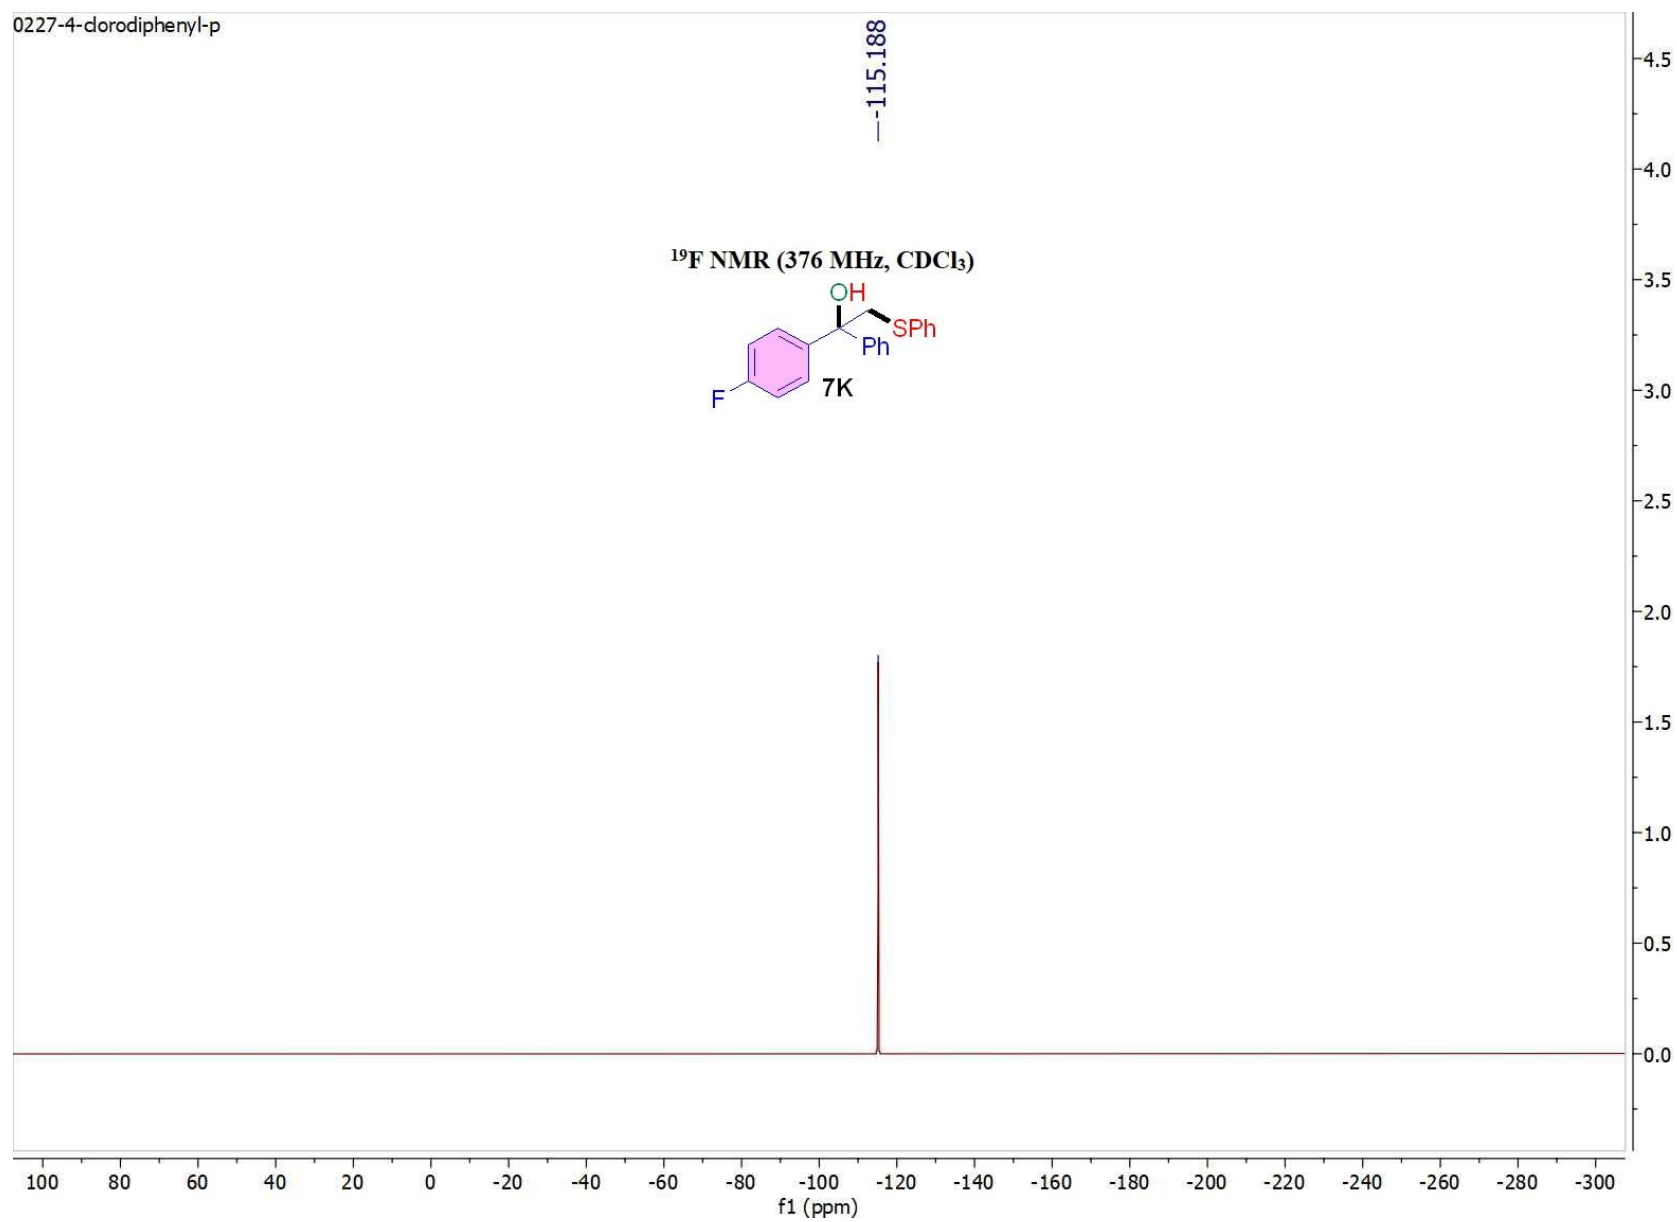

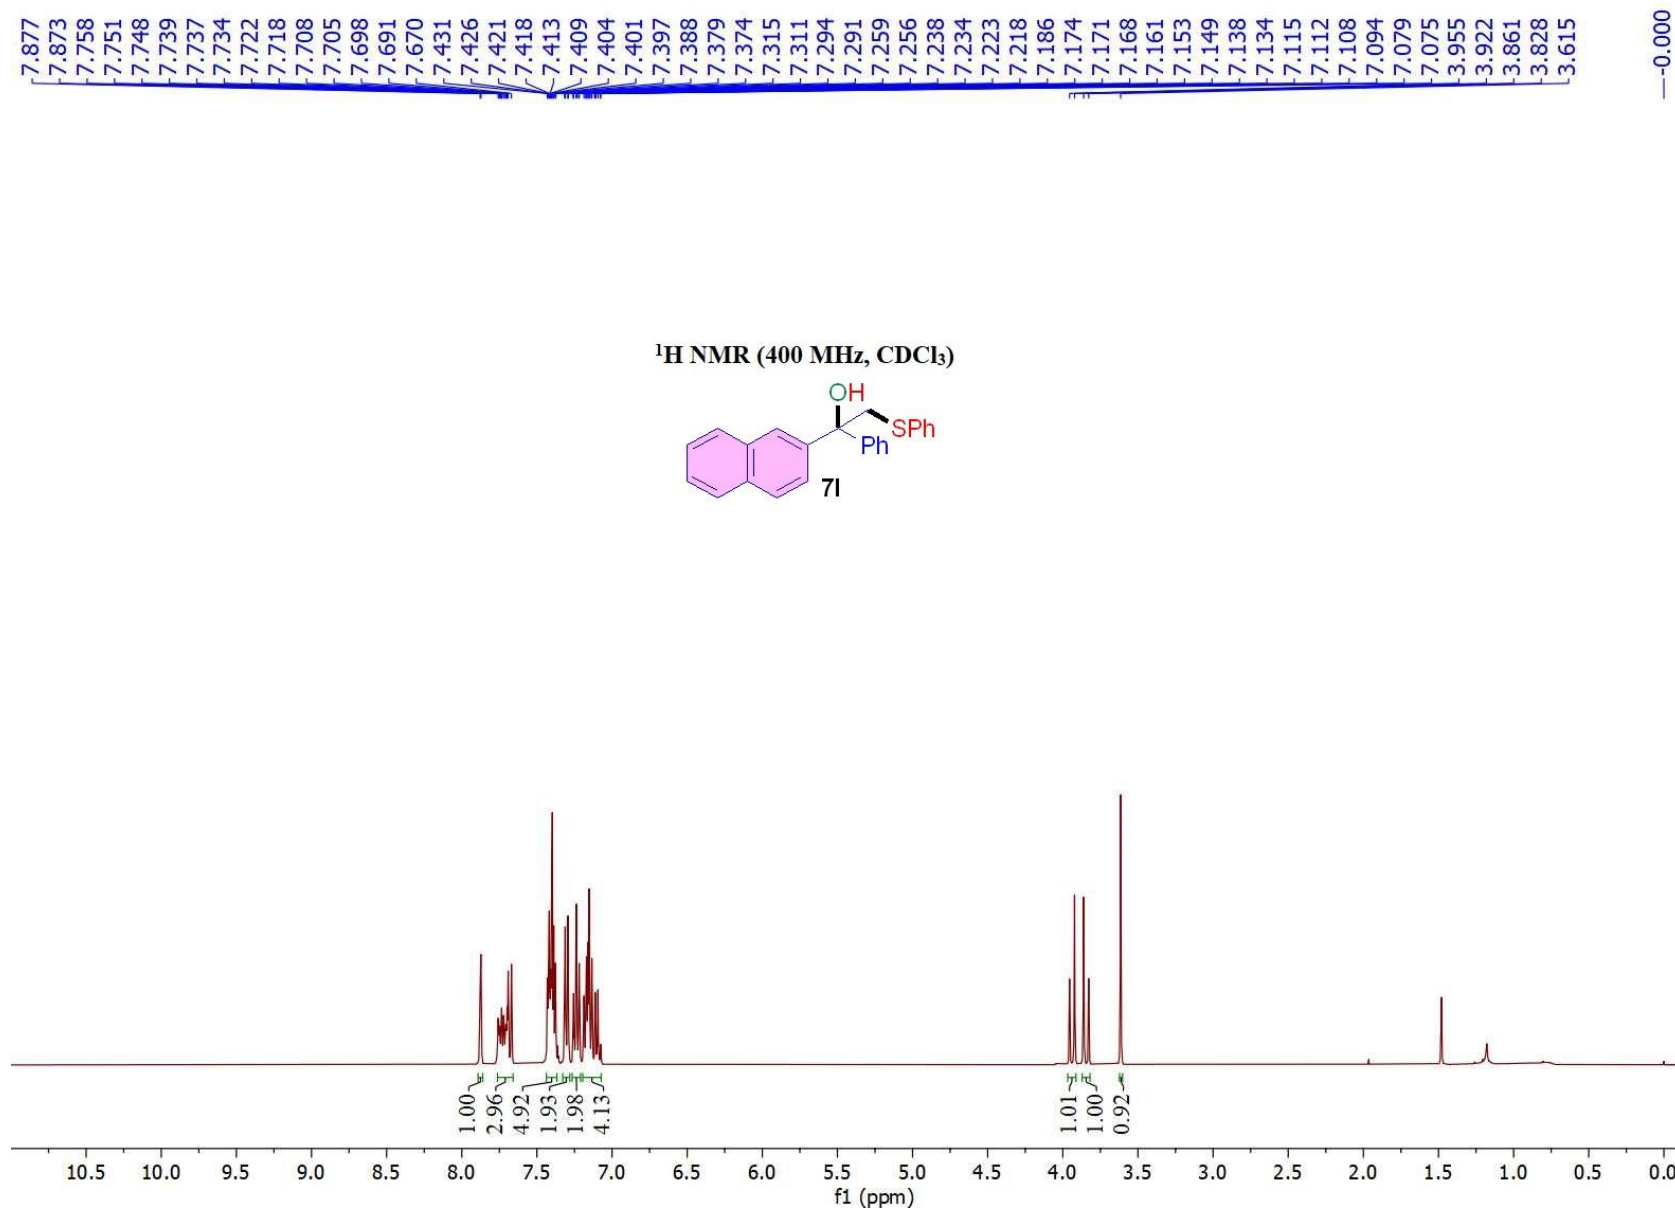



210-2-naphthyl-H #1-10 RT: 0.01-0.26 AV: 10 NL: 2.87E6  
FTMS + p ESI Full ms [200.00-2000.00]

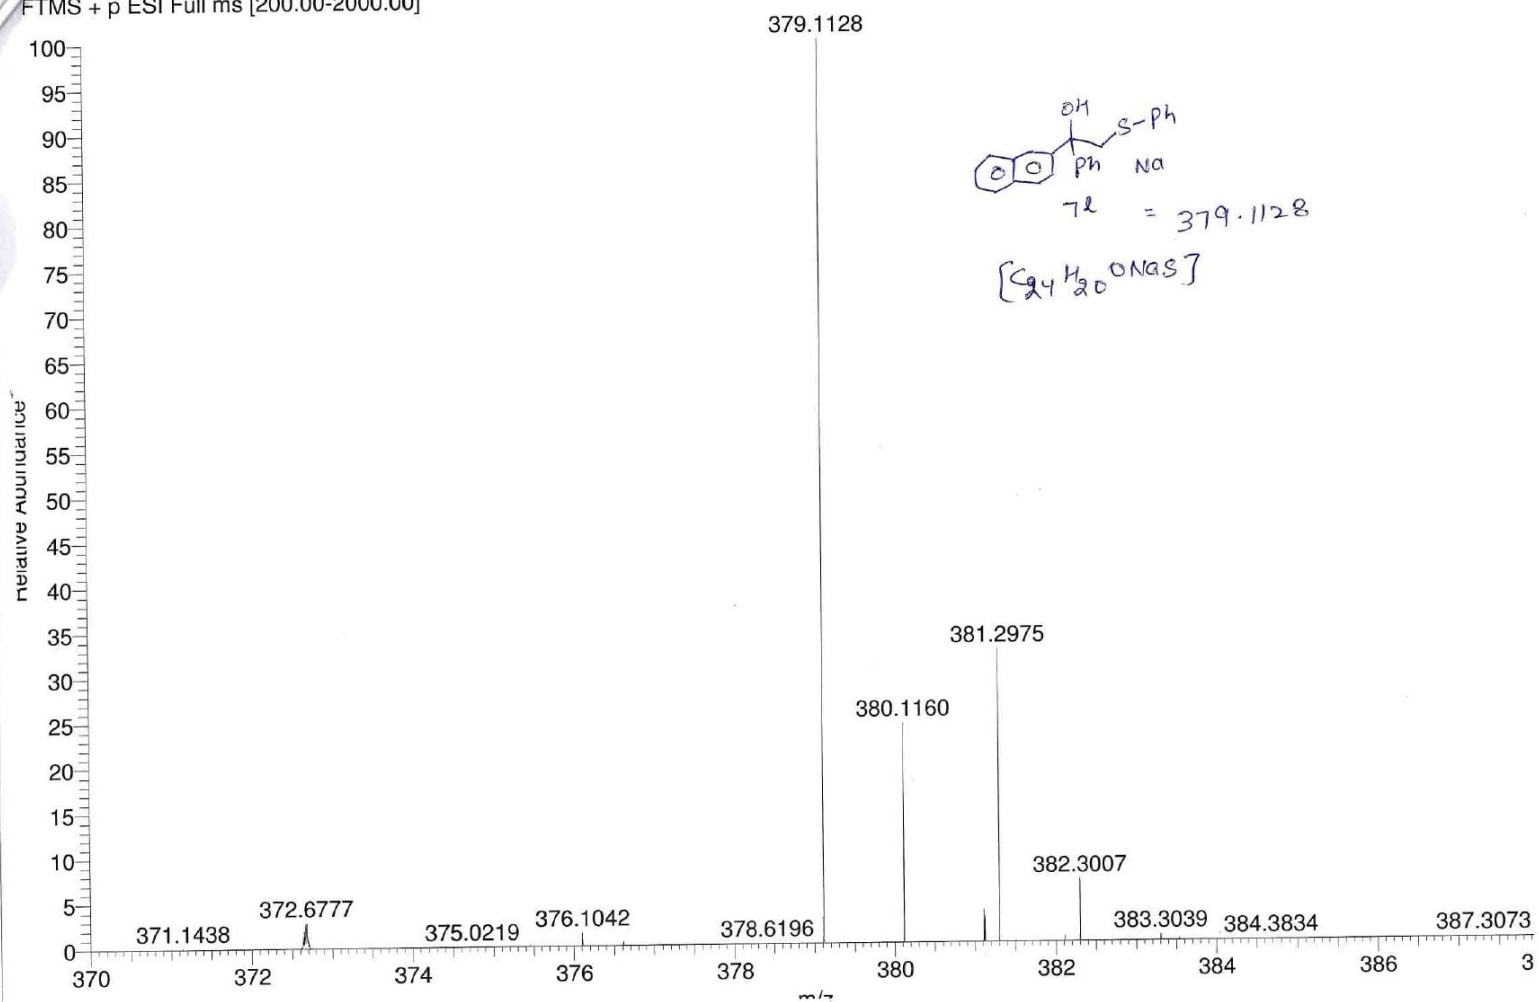

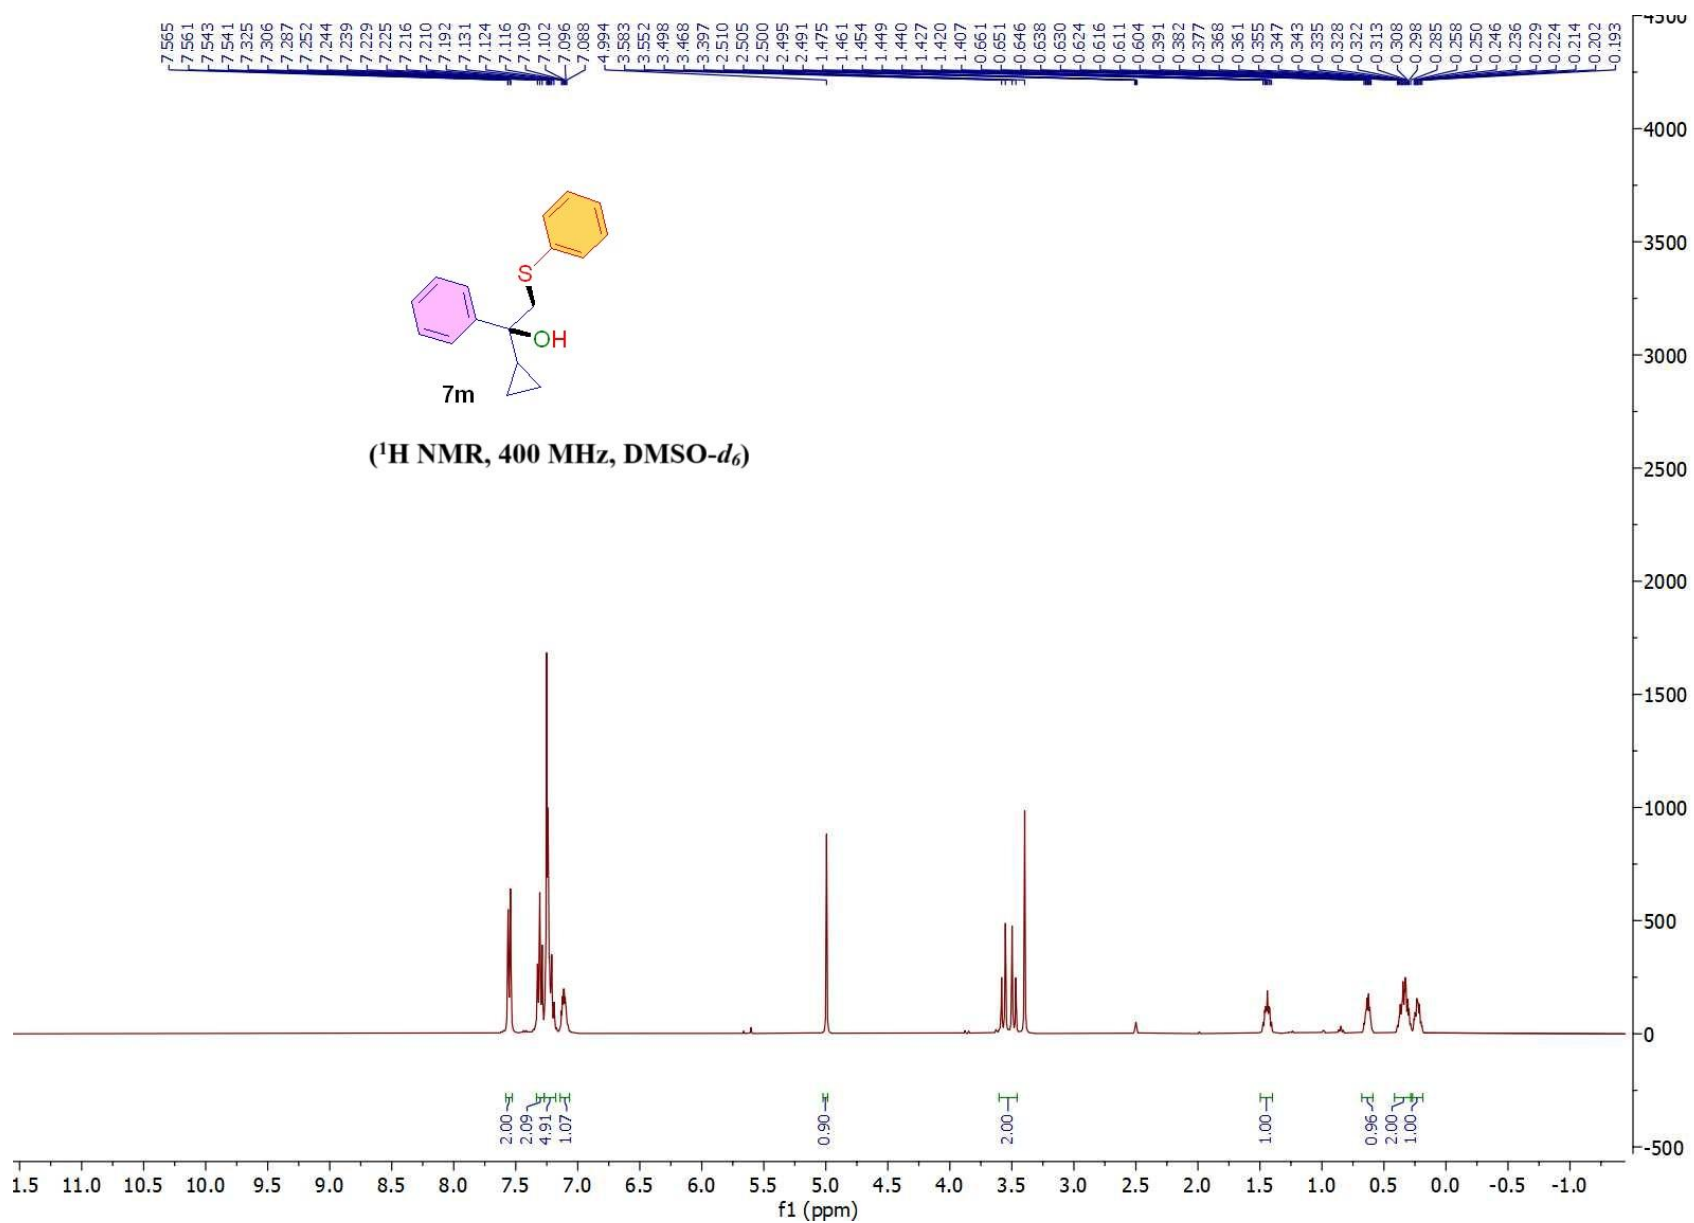

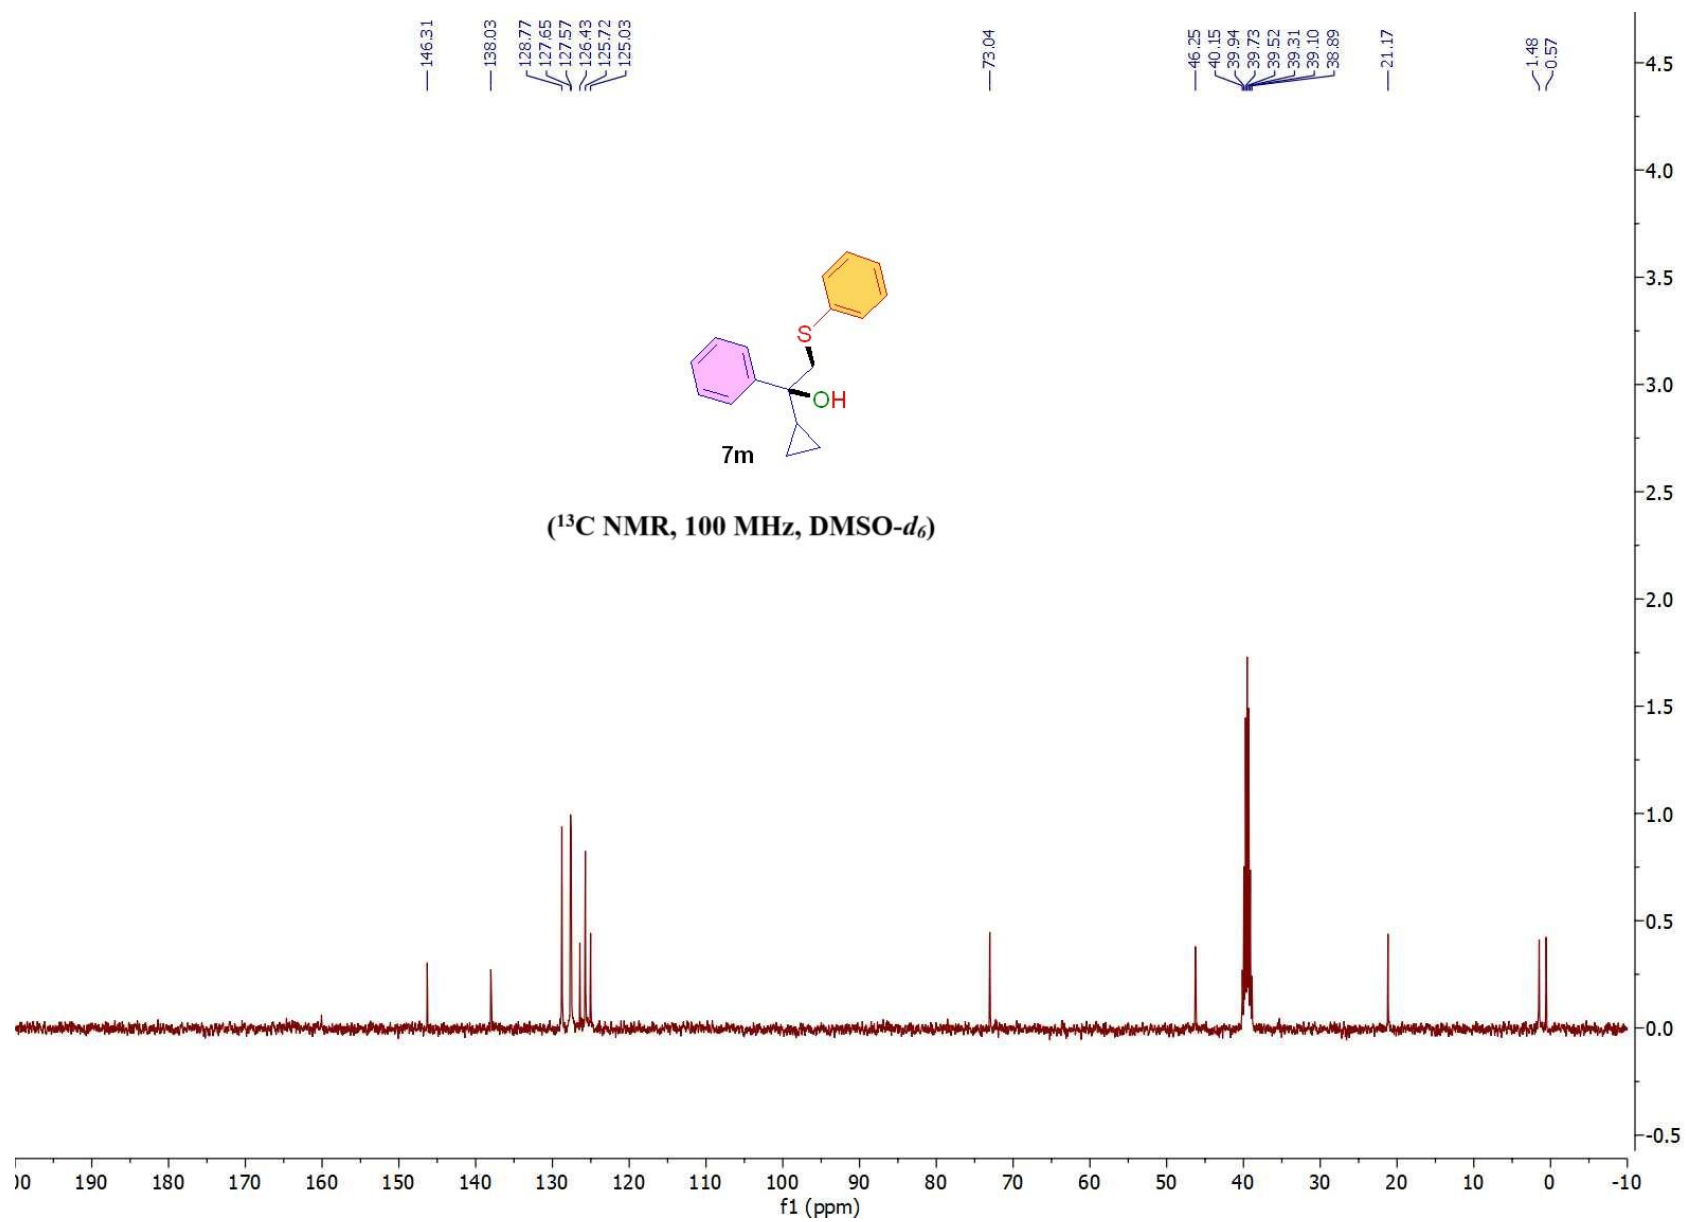

07-thiol-H #1-20 RT: 0.00-0.09 AV: 20 NL: 4.03E6

T: FTMS + p ESI Full ms [100.0000-1000.0000]

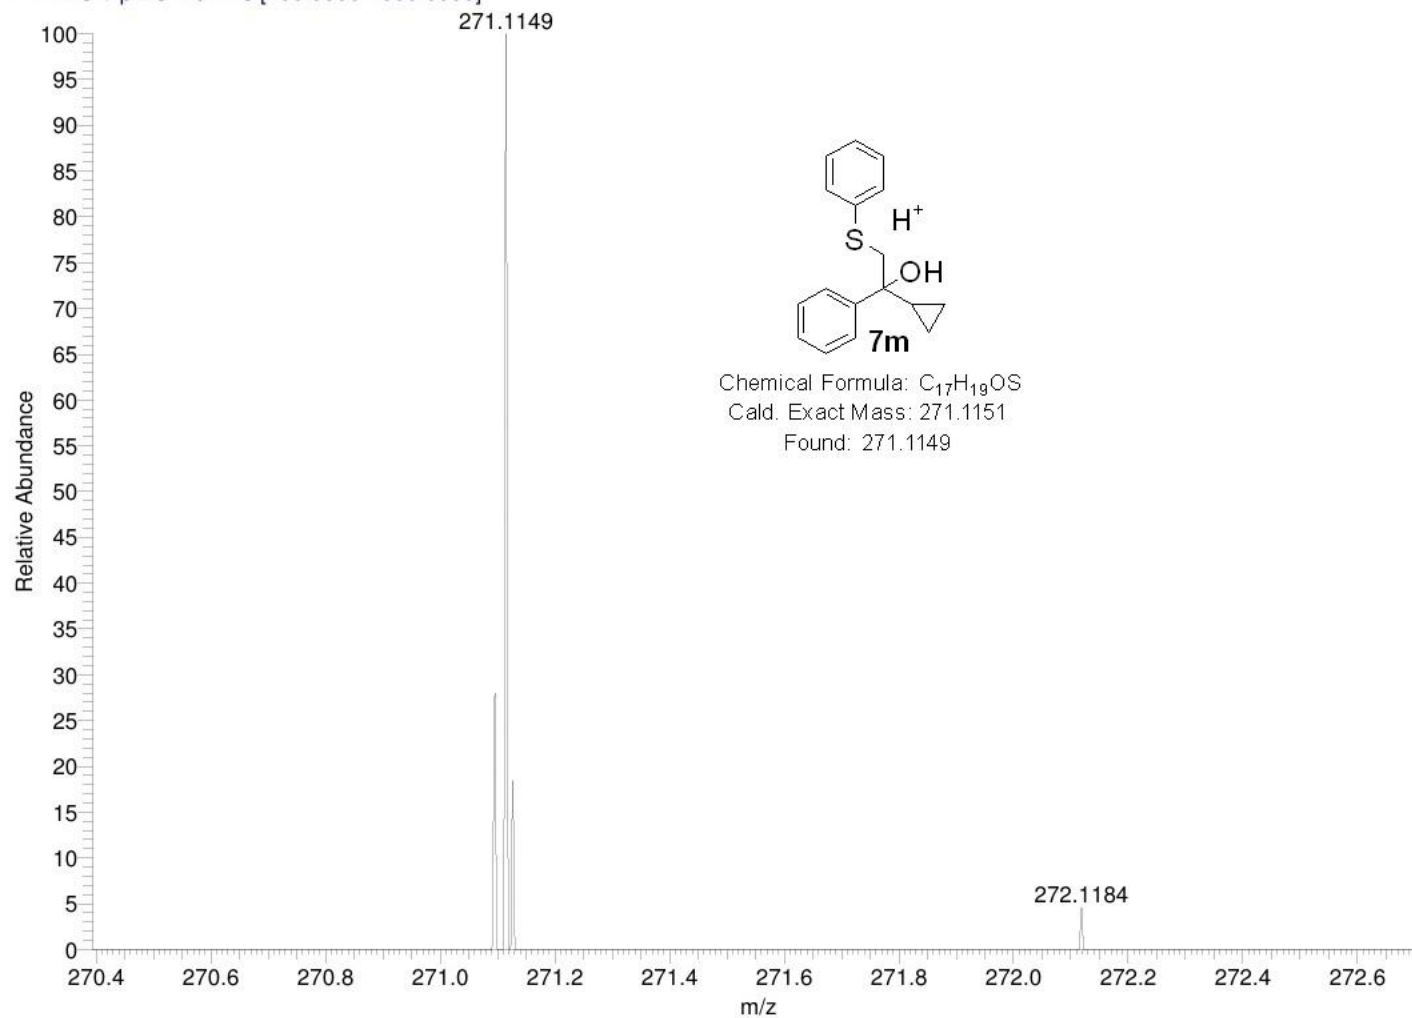

File :D:\MassHunter\GCMS\1\data\830\5JC24040201.D  
Operator :  
Acquired : 02 Apr 2024 14:31 using AcqMethod 20190906-1.M  
Instrument : 830-GCMS  
Sample Name: 1  
Misc Info :  
Vial Number: 13

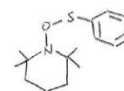

Exact Mass : 266.

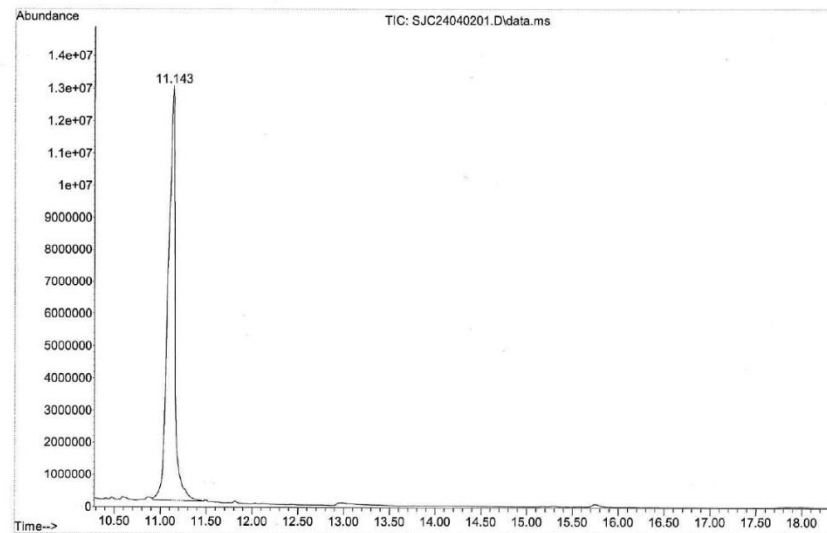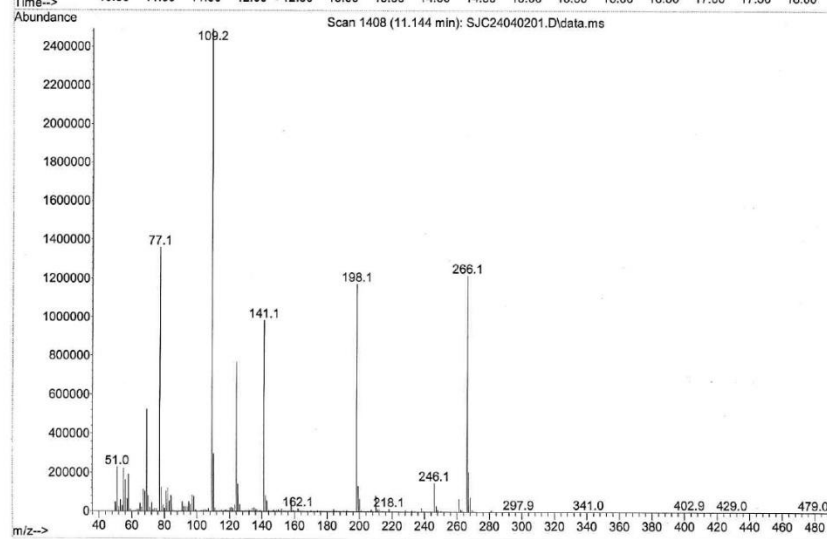

FTMS + p ESI Full ms [200.00-2000.00]  
304.1341

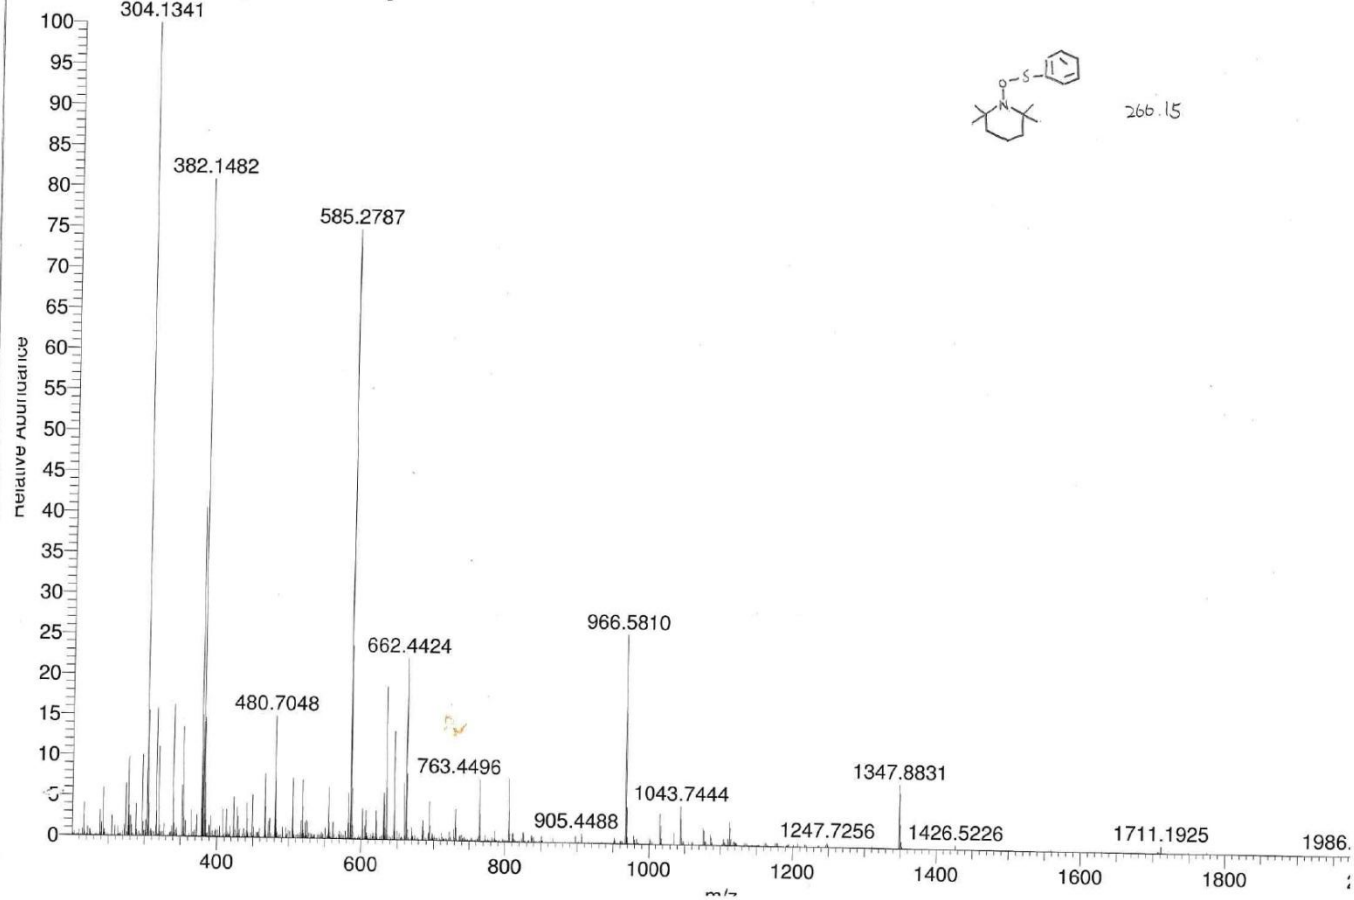

Supplement: d5ob01424g1.pdf [file d5ob01424g1.pdf]
